# Supplementary material for: Design and synthesis of chiral and regenerable [2.2]paracyclophane-based NAD(P)H models and application in biomimetic reduction of flavonoids
Source: Royal Society of Chemistry journal article supplement (doi:10.1039/d0sc04188b), 2020-01-01

## Supporting Information

### Design and Synthesis of Chiral and Regenerable [2.2]Paracyclophane-Based NAD(P)H Models and Application in Biomimetic Reduction of Flavonoids

*Zhou-Hao Zhu, Yi-Xuan Ding, Bo Wu, Yong-Gui Zhou*

*Email: ygzhou@dicp.ac.cn*

#### Table of Contents

|                                                             |         |
|-------------------------------------------------------------|---------|
| 1. General.....                                             | S1      |
| 2. Procedures for Synthesis of NAD(P)H Model CYNAMs.....    | S1-5    |
| 3. Lewis Acid-Promoted Biomimetic Asymmetric Reduction..... | S6-16   |
| 4. Transformations of the Products.....                     | S17-20  |
| 5. Mechanistic Investigation.....                           | S21-26  |
| 6. Determination of the Absolute Configuration.....         | S27     |
| 7. References.....                                          | S28     |
| 8. Copy of NMR and HPLC Spectra.....                        | S29-168 |

## 1. General

All reactions were carried out under an atmosphere of nitrogen using the standard Schlenk techniques, unless otherwise noted. Commercially available reagents were used without further purification. Solvents were treated prior to use according to the standard methods.  $^1\text{H}$  NMR,  $^{13}\text{C}$  NMR spectra were recorded at 400 MHz and 100 MHz with Bruker spectrometer.  $^{19}\text{F}$  was recorded at 376 MHz with Bruker spectrometer. Chemical shifts are reported in ppm using tetramethylsilane (0) as internal standard when using  $\text{CDCl}_3$  as solvent for  $^1\text{H}$  NMR spectra. The following abbreviations were used to symbolize the multiplicities: s = singlet, d = doublet, t = triplet, q = quartet, m = multiplet, br = broad. Flash column chromatography was performed on silica gel (200-300 mesh). All reactions were monitored by TLC analysis. Optical rotations were measured by polarimeter. Enantiomeric excess was determined by HPLC analysis using chiral column described below in detail.

## 2. Procedures for Synthesis of NAD(P)H Model CYNAMs

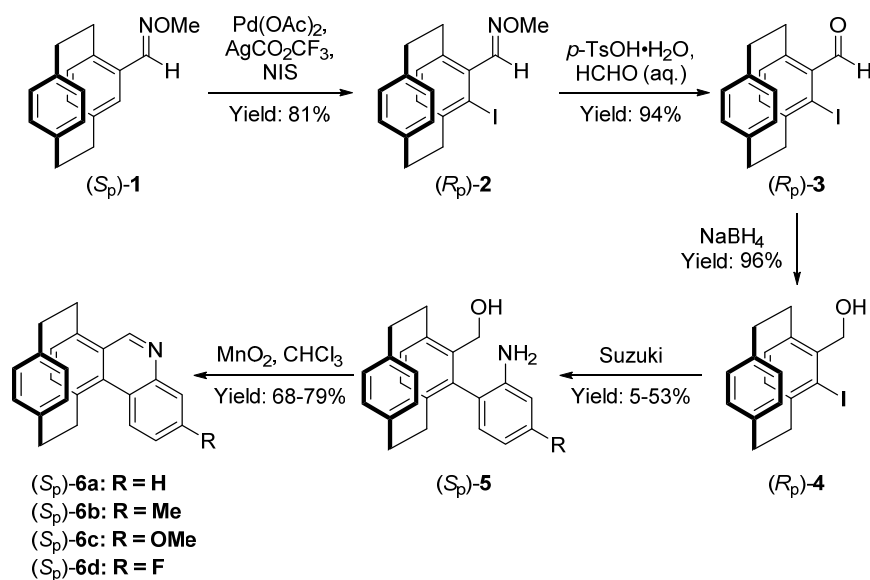

A series of NAD(P)H models **6a-6d** with planar chirality could be synthesized in five steps from the known starting material oxime ether ( $S_p$ )-**1**. Compound ( $S_p$ )-**1** can be prepared according to the known literature procedure with some minor modifications.<sup>[1]</sup>

### 2.1. Synthesis of ( $R_p$ )-5-Formyl-4-iodo[2.2]paracyclophan-*O*-methylaldoxime ( $R_p$ )-**2**

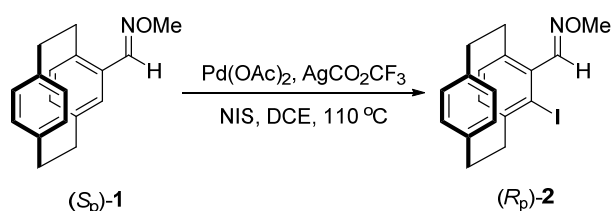

To a solution of *N*-iodosuccinimide (1.981 g, 8.80 mmol), palladium(II) acetate (330 mg, 1.47 mmol) and silver trifluoroacetate (324 mg, 1.47 mmol) in anhydrous dichloroethane (120 mL) in a 250 mL Schlenk flask, ( $S_p$ )-4-formyl[2.2]paracyclophan-*O*-methylaldoxime ( $S_p$ )-**1** (1.947 g, 7.34 mmol) was added under nitrogen. The reaction mixture was stirred for 6 h at 110 °C. The mixture was cooled to ambient temperature and then filtered through celite. The solvent was evaporated in *vacuo*. The crude product was purified by flash chromatography to give the *O*-methylaldoxime

(*R<sub>p</sub>*)-**2** (2.326 g, 81% yield, >99% ee). Yellow solid, new compound, m.p. = 98-99 °C, *R<sub>f</sub>* = 0.60 (hexanes/dichloromethane 1/1),  $[\alpha]_D^{20} = -147.03$  (*c* 0.54, CHCl<sub>3</sub>). <sup>1</sup>H NMR (400 MHz, CDCl<sub>3</sub>) δ 8.05 (d, *J* = 1.1 Hz, 1H), 7.01 (d, *J* = 7.8 Hz, 1H), 6.64-6.56 (m, 2H), 6.56-6.49 (m, 2H), 6.46 (d, *J* = 7.7 Hz, 1H), 4.03 (s, 3H), 3.83-3.73 (m, 1H), 3.46 (t, *J* = 10.6 Hz, 1H), 3.21-2.95 (m, 5H), 2.91-2.83 (m, 1H). <sup>13</sup>C NMR (100 MHz, CDCl<sub>3</sub>) δ 153.5, 143.8, 140.7, 139.6, 138.8, 135.0, 134.3, 133.5, 133.2, 132.9, 130.0, 128.6, 110.1, 62.2, 40.0, 35.0, 34.7, 33.1. HRMS: Calculated for C<sub>18</sub>H<sub>19</sub>INO [M+H]<sup>+</sup> 392.0506, found: 392.0507.

## 2.2. Synthesis of (*R<sub>p</sub>*)-5-Formyl-4-iodo[2.2]paracyclophane (*R<sub>p</sub>*)-**3**

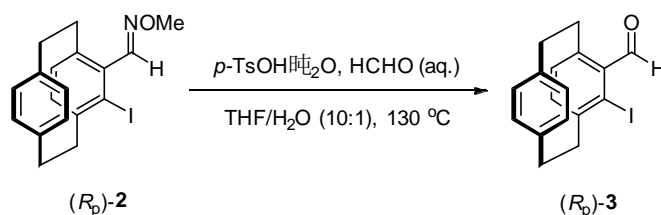

In a sealed tube, (*R<sub>p</sub>*)-5-formyl-4-iodo[2.2]paracyclophane-*O*-methylaldehyde (*R<sub>p</sub>*)-**2** (4.534 g, 11.59 mmol), formaldehyde (37% solution in water, 17.4 mL, 231.80 mmol) and *p*-toluene-sulfonic acid monohydrate (4.413 g, 23.18 mmol) were dissolved in tetrahydrofuran/water (44 mL, 10:1), and the reaction mixture was stirred for 72 h at 130 °C. The mixture was cooled to ambient temperature and extracted with dichloromethane (40 mL×3). Then the combined organic layer was dried over anhydrous sodium sulfate and concentrated in *vacuo*. The solid obtained was purified by flash column chromatography using hexanes/ethyl acetate as eluent to deliver the iodated aldehyde (*R<sub>p</sub>*)-**3** (3.953 g, 94% yield, >99% ee). Yellow solid, new compound, m.p. = 83-84 °C, *R<sub>f</sub>* = 0.80 (hexanes/ethyl acetate 30/1),  $[\alpha]_D^{20} = -163.99$  (*c* 0.40, CHCl<sub>3</sub>). <sup>1</sup>H NMR (400 MHz, CDCl<sub>3</sub>) δ 9.79 (s, 1H), 6.98 (dd, *J* = 7.9, 1.8 Hz, 1H), 6.69-6.54 (m, 3H), 6.49 (dd, *J* = 7.9, 1.8 Hz, 1H), 6.38 (dd, *J* = 7.9, 1.8 Hz, 1H), 3.93-3.80 (m, 1H), 3.62-3.52 (m, 1H), 3.26-3.13 (m, 3H), 3.09-2.96 (m, 2H), 2.87-2.76 (m, 1H). <sup>13</sup>C NMR (100 MHz, CDCl<sub>3</sub>) δ 197.8, 144.6, 144.2, 139.8, 138.8, 137.0, 135.4, 135.3, 133.2, 132.8, 131.1, 128.8, 111.1, 39.2, 35.0, 34.3, 33.1. HRMS: Calculated for C<sub>17</sub>H<sub>16</sub>IO [M+H]<sup>+</sup> 363.0240, found: 363.0244.

## 2.3. Synthesis of (*R<sub>p</sub>*)-5-(Hydroxymethyl)-4-iodo[2.2]paracyclophane (*R<sub>p</sub>*)-**4**

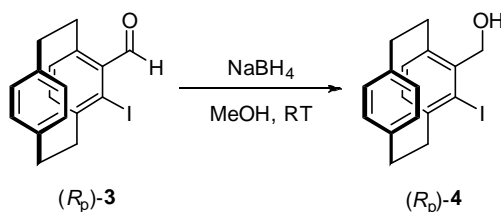

To a solution of (*R<sub>p</sub>*)-5-formyl-4-iodo[2.2]paracyclophane (*R<sub>p</sub>*)-**3** (3.931 g, 10.90 mmol) in methanol (50 mL) under nitrogen was added sodium borohydride (455 mg, 12.00 mmol). The mixture was stirred for 6 h at ambient temperature. When TLC indicated that the reaction was finished, the reaction mixture was quenched with water (20 mL). After being extracted with dichloromethane and washed with water twice, the combined organic layer was dried over anhydrous sodium sulfate and concentrated in *vacuo*. A short silica gel column filtration of the crude mixture afforded the desired product (*R<sub>p</sub>*)-5-(hydroxymethyl)-4-iodo[2.2]paracyclophane (*R<sub>p</sub>*)-**4** (3.791 g, 96% yield, >99% ee). White solid, new compound, m.p. = 92-93 °C, *R<sub>f</sub>* = 0.40 (hexanes/ethyl acetate 5/1),  $[\alpha]_D^{20} = -90.19$  (*c* 0.50, CHCl<sub>3</sub>). <sup>1</sup>H NMR (400 MHz, CDCl<sub>3</sub>) δ 7.01

(dd,  $J = 7.9, 1.9$  Hz, 1H), 6.66-6.52 (m, 3H), 6.47 (d,  $J = 7.7$  Hz, 2H), 4.61 (s, 2H), 3.57-3.45 (m, 2H), 3.24-3.13 (m, 2H), 3.11-2.97 (m, 4H), 1.80 (br s, 1H).  $^{13}\text{C}$  NMR (100 MHz,  $\text{CDCl}_3$ )  $\delta$  144.1, 140.5, 140.2, 139.1, 138.9, 134.5, 133.3, 133.2, 132.8, 130.7, 128.6, 111.3, 67.6, 40.2, 35.1, 34.0, 33.1. HRMS: Calculated for  $\text{C}_{17}\text{H}_{17}\text{INaO}$   $[\text{M}+\text{Na}]^+$  387.0216, found: 387.0215.

#### 2.4. Suzuki Cross-Coupling

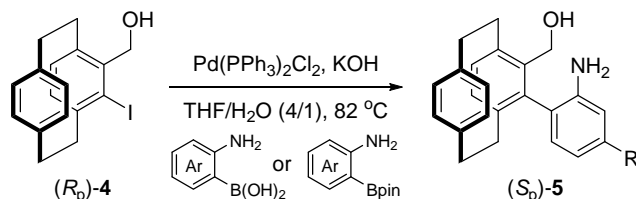

Under nitrogen, a solution of the above alcohol ( $R_p$ )-**4** (911 mg, 2.50 mmol), bis(triphenylphosphine)palladium(II) chloride (351 mg, 20 mol%), potassium hydroxide (421 mg, 7.50 mmol) and the corresponding 2-aminoarylboronic acid or 2-aminoarylboronic acid pinacolate ester<sup>[2]</sup> (5.0 mmol) in tetrahydrofuran (36 mL) and water (9 mL) was heated at 82 °C for 24 h. The mixture was cooled to room temperature and extracted with ethyl acetate (20 mL $\times$ 3). Then the combined organic layer was dried over anhydrous sodium sulfate and concentrated in *vacuo*. The residue was purified by flash column chromatography using hexanes and ethyl acetate as eluent to achieve the corresponding products ( $S_p$ )-**5a-c**.

**( $S_p$ )-5-(Hydroxymethyl)-4-(2-aminophenyl)-[2.2]paracyclophane (5a):** 0.274 g, 33% yield with 2-aminophenylboronic acid, brown foamy solid, new compound, m.p. = 145-146 °C,  $R_f = 0.20$  (hexanes/ethyl acetate 5/1), >99% ee,  $[\alpha]_D^{20} = +7.50$  ( $c$  1.0,  $\text{CHCl}_3$ ).  $^1\text{H}$  NMR (400 MHz,  $\text{CDCl}_3$ )  $\delta$  7.38 (dd,  $J = 7.6, 1.3$  Hz, 1H), 7.15-7.08 (m, 1H), 6.94-6.87 (m, 1H), 6.67-6.58 (m, 4H), 6.50-6.41 (m, 3H), 4.23 (s, 2H), 3.54-3.43 (m, 1H), 3.14-3.06 (m, 1H), 3.05-2.98 (m, 1H), 2.98-2.88 (m, 3H), 2.87-2.76 (m, 4H), 2.75-2.68 (m, 1H).  $^{13}\text{C}$  NMR (100 MHz,  $\text{CDCl}_3$ )  $\delta$  143.9, 140.3, 139.7, 139.5, 138.8, 137.4, 135.4, 134.7, 134.4, 133.3, 132.5, 130.8, 130.6, 129.4, 128.4, 125.5, 118.7, 116.1, 61.1, 35.3, 34.9, 33.0, 32.6. HRMS Calculated for  $\text{C}_{23}\text{H}_{24}\text{NO}$   $[\text{M}+\text{H}]^+$  330.1852, found: 330.1854.

**( $S_p$ )-5-(Hydroxymethyl)-4-(2-amino-4-methylphenyl)-[2.2]paracyclophane (5b):** 0.277 g, 40% yield with 2-amino-4-methylphenylboronic acid, brown foamy solid, new compound, m.p. = 63-64 °C,  $R_f = 0.30$  (hexanes/ethyl acetate 3/1), >99% ee,  $[\alpha]_D^{20} = -2.38$  ( $c$  0.93,  $\text{CHCl}_3$ ).  $^1\text{H}$  NMR (400 MHz,  $\text{CDCl}_3$ )  $\delta$  7.33 (d,  $J = 7.7$  Hz, 1H), 6.79 (d,  $J = 7.2$  Hz, 1H), 6.75-6.64 (m, 3H), 6.57-6.45 (m, 4H), 4.37-4.27 (m, 2H), 3.61-3.50 (m, 1H), 3.21-3.13 (m, 1H), 3.12-3.05 (m, 1H), 3.04-2.89 (m, 4H), 2.89-2.68 (m, 4H), 2.33 (s, 3H).  $^{13}\text{C}$  NMR (100 MHz,  $\text{CDCl}_3$ )  $\delta$  144.1, 140.2, 139.7, 139.6, 139.0, 138.2, 137.5, 135.2, 134.9, 134.3, 133.3, 132.4, 130.9, 130.6, 129.2, 122.4, 119.4, 116.6, 61.2, 35.3, 34.9, 33.0, 32.6, 21.3. HRMS Calculated for  $\text{C}_{24}\text{H}_{25}\text{NONa}$   $[\text{M}+\text{Na}]^+$  366.1828, found: 366.1833.

**( $S_p$ )-5-(Hydroxymethyl)-4-(2-amino-4-methoxyphenyl)-[2.2]paracyclophane (5c):** 0.296 g, 53% yield with 2-amino-4-methoxyphenylboronic acid pinacolate ester, pale yellow foamy solid, new compound, m.p. = 69-70 °C,  $R_f = 0.20$  (hexanes/ethyl acetate 5/1), >99% ee,  $[\alpha]_D^{20} = +2.89$  ( $c$  0.90,  $\text{CHCl}_3$ ).  $^1\text{H}$  NMR (400 MHz,  $\text{CDCl}_3$ )  $\delta$  7.34 (d,  $J = 8.4$  Hz, 1H), 6.74-6.63 (m, 3H), 6.58-6.46 (m, 4H), 6.27 (d,  $J = 2.4$  Hz, 1H), 4.34 (dd,  $J = 28.7, 11.9$  Hz, 2H), 3.83 (s, 3H),

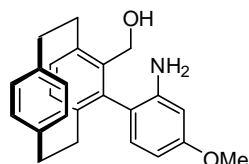

3.59-3.51 (m, 1H), 3.21-3.14 (m, 1H), 3.12-3.05 (m, 1H), 3.05-2.86 (m, 5H), 2.86-2.79 (m, 1H), 2.61 (br s, 2H). <sup>13</sup>C NMR (101 MHz, CDCl<sub>3</sub>) δ 159.9, 145.7, 140.4, 139.7, 139.6, 139.3, 137.6, 135.1, 134.8, 134.3, 133.3, 132.4, 130.9, 130.5, 130.4, 117.8, 103.9, 101.2, 61.1, 55.2, 35.3, 35.0, 33.1, 32.7. HRMS: Calculated for C<sub>24</sub>H<sub>26</sub>NO<sub>2</sub> [M+H]<sup>+</sup> 360.1958, found: 360.1972.

## 2.5. Synthesis of Chiral and Regenerable NAD(P)H Model CYNAMs (*S<sub>p</sub>*)-6

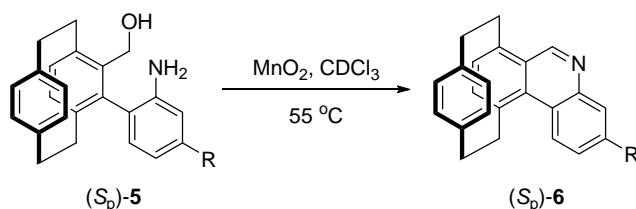

To a solution of compound (*S<sub>p</sub>*)-5 (0.80 mmol) in chloroform (35 mL) was added manganese dioxide (1.251 g, 14.40 mmol). The resulted brown slurry was warmed to 55 °C for 72 h. When TLC indicated that the reaction was finished, the reaction mixture was directly purified by column chromatography on silica gel using hexanes and ethyl acetate to give products (*S<sub>p</sub>*)-6a-6c.

**(*S<sub>p</sub>*)-[2]Paracyclo[2](7,10)phenanthridinophane (6a):** 0.190 g, 77% yield, yellow solid, new compound, mp = 142-143 °C, *R<sub>f</sub>* = 0.60 (hexanes/ethyl acetate 3/1), >99% ee, [α]<sub>D</sub><sup>20</sup> = +407.70 (*c* 0.22, CHCl<sub>3</sub>).

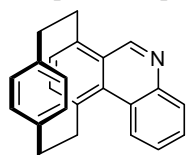

<sup>1</sup>H NMR (400 MHz, CDCl<sub>3</sub>) δ 9.19 (s, 1H), 8.52 (dd, *J* = 8.3, 1.1 Hz, 1H), 8.19 (dd, *J* = 8.1, 1.0 Hz, 1H), 7.74-7.67 (m, 1H), 7.65-7.56 (m, 1H), 7.07 (d, *J* = 7.5 Hz, 1H), 6.88 (d, *J* = 7.5 Hz, 1H), 6.56-6.45 (m, 2H), 5.81 (dd, *J* = 7.8, 1.8 Hz, 1H), 5.31 (dd, *J* = 7.8, 1.8 Hz, 1H), 4.38-4.29 (m, 1H), 4.06-3.97 (m, 1H), 3.37-3.23 (m, 2H), 3.18-3.10 (m, 1H), 3.09-2.98 (m, 2H), 2.85-2.76 (m, 1H). <sup>13</sup>C NMR (100 MHz, CDCl<sub>3</sub>) δ 150.3, 144.6, 138.7, 138.3, 138.1, 137.9, 135.9, 134.8, 132.8, 132.4, 132.0, 130.4, 130.0, 128.6, 128.4, 128.1, 126.8, 126.4, 124.9, 38.3, 34.8, 34.2, 32.6. HRMS Calculated for C<sub>23</sub>H<sub>20</sub>N [M+H]<sup>+</sup> 310.1590, found: 310.1593.

**(*S<sub>p</sub>*)-3-Methyl[2]paracyclo[2](7,10)phenanthridinophane (6b):** 0.204 g, 79% yield, yellow solid, new compound, mp = 153-154 °C, *R<sub>f</sub>* = 0.60 (hexanes/ethyl acetate 3/1), >99% ee, [α]<sub>D</sub><sup>20</sup> = +253.48 (*c* 0.20, CHCl<sub>3</sub>).

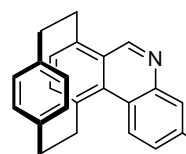

<sup>1</sup>H NMR (400 MHz, CDCl<sub>3</sub>) δ 9.16 (s, 1H), 8.43 (d, *J* = 8.5 Hz, 1H), 7.97 (s, 1H), 7.45 (dd, *J* = 8.5, 1.7 Hz, 1H), 7.07 (d, *J* = 7.5 Hz, 1H), 6.87 (d, *J* = 7.5 Hz, 1H), 6.61-6.41 (m, 2H), 5.81 (dd, *J* = 7.8, 1.8 Hz, 1H), 5.33 (dd, *J* = 7.8, 1.7 Hz, 1H), 4.39-4.30 (m, 1H), 4.06-3.97 (m, 1H), 3.36-3.24 (m, 2H), 3.19-3.11 (m, 1H), 3.10-3.00 (m, 2H), 2.86-2.77 (m, 1H), 2.62 (s, 3H). <sup>13</sup>C NMR (100 MHz, CDCl<sub>3</sub>) δ 150.2, 144.5, 138.6, 138.3, 138.3, 138.1, 137.9, 135.6, 134.9, 132.4, 132.4, 132.0, 130.3, 129.3, 128.4, 128.3, 128.2, 126.5, 122.7, 38.4, 34.8, 34.1, 32.5, 21.5. HRMS Calculated for C<sub>24</sub>H<sub>22</sub>N [M+H]<sup>+</sup> 324.1747, found: 324.1752.

**(*S<sub>p</sub>*)-3-Methoxy[2]paracyclo[2](7,10)phenanthridinophane (6c):** 0.191 g, 74% yield, yellow solid, new compound, mp = 181-182 °C, *R<sub>f</sub>* = 0.50 (hexanes/ethyl acetate 3/1), >99% ee, [α]<sub>D</sub><sup>20</sup> = +256.89 (*c* 0.42, CHCl<sub>3</sub>).

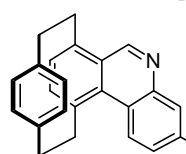

<sup>1</sup>H NMR (400 MHz, CDCl<sub>3</sub>) δ 9.13 (s, 1H), 8.44 (d, *J* = 9.2 Hz, 1H), 7.58 (d, *J* = 2.7 Hz, 1H), 7.26 (dd, *J* = 9.1, 2.8 Hz, 1H), 7.04 (d, *J* = 7.5 Hz, 1H), 6.84 (d, *J* = 7.5 Hz, 1H), 6.55-6.43 (m, 2H), 5.80 (dd, *J* = 7.8, 1.8 Hz, 1H), 5.34 (dd, *J* = 7.8, 1.7 Hz, 1H), 4.34-4.26 (m, 1H), 4.06-3.95 (m, 1H), 4.01 (s, 3H), 3.33-3.23 (m, 2H), 3.18-3.10 (m, 1H), 3.09-2.98 (m, 2H), 2.83-2.74 (m, 1H). <sup>13</sup>C NMR (100 MHz, CDCl<sub>3</sub>) δ 159.3, 150.7, 146.3, 138.6, 138.3, 138.2, 137.8,

135.1, 132.3, 132.1, 131.9, 130.2, 128.1, 127.9, 127.8, 119.2, 117.5, 109.4, 55.5, 38.6, 34.8, 34.1, 32.5. HRMS Calculated for C<sub>24</sub>H<sub>22</sub>NO [M+H]<sup>+</sup> 340.1696, found: 340.1697.

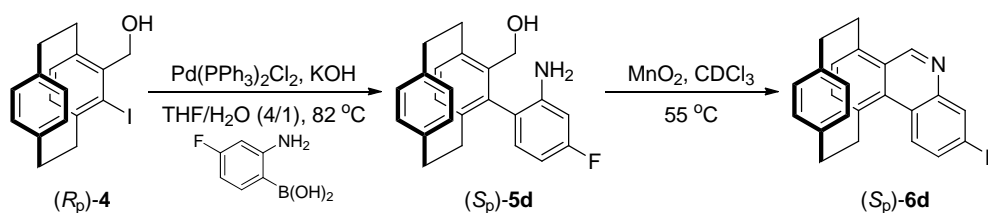

Under nitrogen, a solution of alcohol (*R<sub>p</sub>*)-**4** (729 mg, 2.0 mmol), bis(triphenylphosphine)-palladium(II) chloride (421 mg, 30 mol%), potassium hydroxide (505 mg, 9.0 mmol) and (2-amino-4-fluorophenyl)boronic acid<sup>2</sup> (643 mg, 4.2 mmol) in tetrahydrofuran (30 mL) and water (7.5 mL) was heated at 82 °C for 24 h. The mixture was cooled to ambient temperature and extracted with ethyl acetate (20 mL×3). Then the combined organic layer was dried over anhydrous sodium sulfate and concentrated in *vacuo*. The oil obtained was simply purified by flash column chromatography to achieve the product (*S<sub>p</sub>*)-**5d** (36 mg, 5% yield). Then to a solution of crude product (*S<sub>p</sub>*)-**5d** (36 mg, 0.10 mmol) in chloroform (30 mL) was added manganese dioxide (162 mg, 1.80 mmol). The resulted brown slurry was warmed to 55 °C for 72 h. When TLC indicated that the reaction was finished, the reaction mixture was directly purified by column chromatography on silica gel using hexanes and ethyl acetate to give compound (*S<sub>p</sub>*)-**6d**.

**(*S<sub>p</sub>*)-3-Fluoro[2]paracyclo[2](7,10)phenanthridinophane (6d)**: 23 mg, 68% yield, brown oil, new compound, *R<sub>f</sub>* = 0.50 (hexanes/ethyl acetate 5/1), >99% ee, [α]<sub>D</sub><sup>20</sup> = +254.57 (*c* 0.48, CHCl<sub>3</sub>).

<sup>1</sup>H NMR (400 MHz, CDCl<sub>3</sub>) δ 9.19 (s, 1H), 8.51 (dd, *J* = 9.2, 6.0 Hz, 1H), 7.83 (dd, *J* = 9.7, 2.7 Hz, 1H), 7.44-7.34 (m, 1H), 7.09 (d, *J* = 7.5 Hz, 1H), 6.90 (d, *J* = 7.5 Hz, 1H), 6.59-6.43 (m, 2H), 5.79 (dd, *J* = 7.8, 1.7 Hz, 1H), 5.33 (dd, *J* = 7.8, 1.6 Hz, 1H), 4.33-4.22 (m, 1H), 4.01 (dd, *J* = 12.9, 11.0 Hz, 1H), 3.38-3.25 (m, 2H), 3.21-3.12 (m, 1H), 3.09-3.00 (m, 2H), 2.84-2.74 (m, 1H). <sup>13</sup>C NMR (100 MHz, CDCl<sub>3</sub>) δ 161.8 (d, <sup>1</sup>*J*<sub>F-C</sub> = 247.1 Hz), 151.4, 146.0, 145.9, 138.5, 138.5, 138.5, 137.9, 135.4, 134.7, 132.7, 132.5, 132.1, 130.4, 128.6 (d, <sup>3</sup>*J*<sub>F-C</sub> = 9.1 Hz), 128.3, 121.7, 115.4 (d, <sup>2</sup>*J*<sub>F-C</sub> = 23.3 Hz), 114.2 (d, <sup>2</sup>*J*<sub>F-C</sub> = 20.1 Hz), 38.4, 34.8, 34.2, 32.5. <sup>19</sup>F NMR (376 MHz, CDCl<sub>3</sub>) δ -112.49. HRMS Calculated for C<sub>23</sub>H<sub>19</sub>FN [M+H]<sup>+</sup> 328.1496, found: 328.1498.

### 3. Lewis Acid-Promoted Biomimetic Asymmetric Reduction

#### 3.1 Synthesis of Flavonoids

Flavonoids **7** could be prepared from readily available 2-fluoroaryl formyl chloride<sup>[3]</sup> and beta-ketoester<sup>[4-5]</sup> according to the known literature procedure with minor modification.<sup>[6]</sup> Among them, compounds **7a-b**,<sup>[7]</sup> **7c**<sup>[8]</sup> and **7e-f**<sup>[8]</sup> are the known compounds.

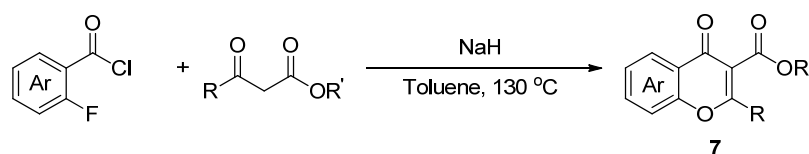

Under nitrogen, beta-ketoester (10 mmol) was dissolved in dry toluene (20 mL). Sodium hydride (11 mmol) was added and the mixture was stirred at room temperature for 30 min. Then the solution of 2-fluoroaryl formyl chloride (10 mmol) in dry toluene (20 mL) was added dropwise to the stirred mixture. After that the reaction was stirred under reflux overnight. The mixture was cooled to ambient temperature and quenched with water (20 mL). Then the mixture was extracted with ethyl acetate (40 mL×3). Then the combined organic layer was dried over anhydrous sodium sulfate and concentrated in *vacuo*. The products **7** were purified by flash column chromatography using hexanes/ethyl acetate as eluent. The solid products **7** could be obtained by recrystallization from dichloromethane/hexanes.

**Butyl 4-oxo-2-phenyl-4H-chromene-3-carboxylate (7d):** 1.631 g, 56% yield, pale yellow oil, new compound, mp = 53-54 °C,  $R_f$  = 0.20 (hexanes/ethyl acetate 5/1). <sup>1</sup>H NMR (400 MHz, CDCl<sub>3</sub>)

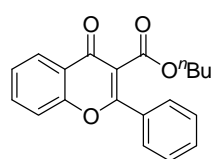

$\delta$  8.29 (dd,  $J$  = 8.0, 1.6 Hz, 1H), 7.80-7.70 (m, 3H), 7.60-7.50 (m, 4H), 7.49-7.43 (m, 1H), 4.22 (t,  $J$  = 6.6 Hz, 2H), 1.57-1.48 (m, 2H), 1.24-1.14 (m, 2H), 0.84 (t,  $J$  = 7.4 Hz, 3H). <sup>13</sup>C NMR (100 MHz, CDCl<sub>3</sub>)  $\delta$  175.0, 165.2, 163.1, 155.9, 134.3, 132.1, 131.6, 128.8, 128.1, 126.2, 125.7, 123.2, 118.5, 118.1, 65.8, 30.3, 18.9, 13.6. HRMS Calculated for C<sub>20</sub>H<sub>19</sub>O<sub>4</sub> [M+H]<sup>+</sup> 323.1278, found: 323.1276.

**Cyclohexyl 4-oxo-2-phenyl-4H-chromene-3-carboxylate (7g):** 1.474 g, 43% yield, white solid, new compound, mp = 109-110 °C,  $R_f$  = 0.25 (hexanes/ethyl acetate 10/1). <sup>1</sup>H NMR (400

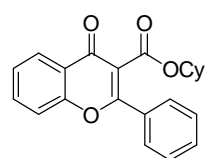

MHz, CDCl<sub>3</sub>)  $\delta$  8.26 (d,  $J$  = 7.8 Hz, 1H), 7.82-7.68 (m, 3H), 7.58-7.41 (m, 5H), 5.02-4.91 (m, 1H), 1.84-1.74 (m, 2H), 1.66-1.56 (m, 2H), 1.52-1.44 (m, 1H), 1.39-1.26 (m, 4H), 1.24-1.14 (m, 1H). <sup>13</sup>C NMR (100 MHz, CDCl<sub>3</sub>)  $\delta$  175.0, 164.5, 162.8, 155.9, 134.2, 132.1, 131.5, 128.7, 128.2, 126.1, 125.6, 123.3, 118.9, 118.1, 74.4, 31.2, 25.3, 23.6. HRMS Calculated for C<sub>22</sub>H<sub>21</sub>O<sub>4</sub> [M+H]<sup>+</sup> 349.1434, found: 349.1433.

**Cyclohexyl 4-oxo-2-(*p*-tolyl)-4H-chromene-3-carboxylate (7h):** 1.876 g, 59% yield, white solid, new compound, mp = 110-111 °C,  $R_f$  = 0.35 (hexanes/ethyl acetate 10/1). <sup>1</sup>H NMR (400

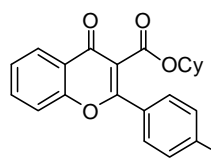

MHz, CDCl<sub>3</sub>)  $\delta$  8.27 (d,  $J$  = 7.7 Hz, 1H), 7.78-7.64 (m, 3H), 7.52 (d,  $J$  = 8.4 Hz, 1H), 7.44 (t,  $J$  = 7.5 Hz, 1H), 7.34-7.27 (m, 2H), 5.09-4.91 (m, 1H), 2.45 (s, 3H), 1.92-1.80 (m, 2H), 1.70-1.59 (m, 2H), 1.55-1.47 (m, 1H), 1.45-1.29 (m, 4H), 1.28-1.17 (m, 1H). <sup>13</sup>C NMR (100 MHz, CDCl<sub>3</sub>)  $\delta$  175.1, 164.8, 162.8, 155.9, 142.2, 134.2, 129.4, 129.2, 128.1, 126.1, 125.5, 123.3, 118.4, 118.0, 74.4, 31.2, 25.3, 23.6, 21.6. HRMS Calculated for C<sub>23</sub>H<sub>23</sub>O<sub>4</sub> [M+H]<sup>+</sup> 363.1591, found: 363.1593.

**Cyclohexyl 4-oxo-2-(*m*-tolyl)-4*H*-chromene-3-carboxylate (7i):** 0.806 g, 33% yield, white solid, new compound, mp = 119-120 °C,  $R_f = 0.30$  (hexanes/ethyl acetate 10/1).  $^1\text{H}$  NMR (400 MHz,  $\text{CDCl}_3$ )  $\delta$  8.28 (dd,  $J = 7.9, 1.1$  Hz, 1H), 7.76-7.69 (m, 1H), 7.63-7.51 (m, 3H), 7.48-7.35 (m, 3H), 5.05-4.94 (m, 1H), 2.44 (s, 3H), 1.89-1.78 (m, 2H), 1.68-1.57 (m, 2H), 1.54-1.46 (m, 1H), 1.43-1.29 (m, 4H), 1.27-1.17 (m, 1H).  $^{13}\text{C}$  NMR (100 MHz,  $\text{CDCl}_3$ )  $\delta$  175.1, 164.6, 163.0, 155.9, 138.6, 134.2, 132.3, 132.0, 128.7, 126.1, 125.6, 125.4, 123.3, 118.8, 118.1, 74.3, 31.2, 25.3, 23.6, 21.4. HRMS Calculated for  $\text{C}_{23}\text{H}_{23}\text{O}_4$   $[\text{M}+\text{H}]^+$  363.1591, found: 363.1597.

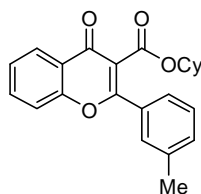

**Cyclohexyl 4-oxo-2-(*o*-tolyl)-4*H*-chromene-3-carboxylate (7j):** 0.492 g, 15% yield, white solid, new compound, mp = 130-131 °C,  $R_f = 0.30$  (hexanes/ethyl acetate 10/1).  $^1\text{H}$  NMR (400 MHz,  $\text{CDCl}_3$ )  $\delta$  8.36-8.28 (m, 1H), 7.78-7.68 (m, 1H), 7.51-7.40 (m, 4H), 7.34 (d,  $J = 7.6$  Hz, 1H), 7.31-7.25 (m, 1H), 4.84-4.73 (m, 1H), 2.41 (s, 3H), 1.65-1.39 (m, 5H), 1.30-1.07 (m, 5H).  $^{13}\text{C}$  NMR (100 MHz,  $\text{CDCl}_3$ )  $\delta$  174.7, 165.2, 163.5, 156.0, 137.0, 134.2, 131.9, 130.9, 130.5, 129.0, 126.2, 125.8, 125.7, 123.6, 120.2, 118.1, 73.8, 31.0, 25.2, 23.5, 19.6. HRMS Calculated for  $\text{C}_{23}\text{H}_{23}\text{O}_4$   $[\text{M}+\text{H}]^+$  363.1591, found: 363.1593.

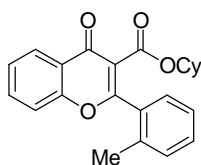

**Cyclohexyl 2-(naphthalen-2-yl)-4-oxo-4*H*-chromene-3-carboxylate (7k):** 1.021 g, 33% yield, white solid, new compound, mp = 120-121 °C,  $R_f = 0.50$  (hexanes/ethyl acetate 5/1).  $^1\text{H}$  NMR (400 MHz,  $\text{CDCl}_3$ )  $\delta$  8.40-8.22 (m, 2H), 8.01-7.90 (m, 3H), 7.85 (dd,  $J = 8.6, 1.4$  Hz, 1H), 7.75 (t,  $J = 7.8$  Hz, 1H), 7.69-7.54 (m, 3H), 7.47 (t,  $J = 7.5$  Hz, 1H), 5.13-4.92 (m, 1H), 1.94-1.73 (m, 2H), 1.66-1.51 (m, 2H), 1.50-1.42 (m, 1H), 1.41-1.23 (m, 4H), 1.21-1.12 (m, 1H).  $^{13}\text{C}$  NMR (100 MHz,  $\text{CDCl}_3$ )  $\delta$  175.1, 164.7, 162.6, 156.0, 134.5, 134.3, 132.6, 129.3, 129.1, 128.9, 128.7, 128.1, 127.9, 127.1, 126.2, 125.6, 124.3, 123.3, 119.1, 118.1, 74.5, 31.2, 25.2, 23.5. HRMS Calculated for  $\text{C}_{26}\text{H}_{23}\text{O}_4$   $[\text{M}+\text{H}]^+$  399.1591, found: 399.1595.

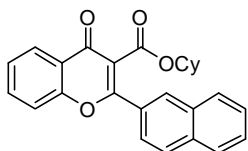

**Cyclohexyl 2-(4-fluorophenyl)-4-oxo-4*H*-chromene-3-carboxylate (7l):** 0.998 g, 36% yield, white solid, new compound, mp = 114-115 °C,  $R_f = 0.32$  (hexanes/ethyl acetate 10/1).  $^1\text{H}$  NMR (400 MHz,  $\text{CDCl}_3$ )  $\delta$  8.27 (d,  $J = 7.8$  Hz, 1H), 7.86-7.70 (m, 3H), 7.56-7.42 (m, 2H), 7.21 (t,  $J = 8.5$  Hz, 2H), 5.06-4.91 (m, 1H), 1.90-1.78 (m, 2H), 1.70-1.60 (m, 2H), 1.55-1.47 (m, 1H), 1.43-1.30 (m, 4H), 1.27-1.17 (m, 1H).  $^{13}\text{C}$  NMR (100 MHz,  $\text{CDCl}_3$ )  $\delta$  175.0, 164.6 (d,  $^1J_{\text{F-C}} = 251.8$  Hz), 164.5, 161.5, 155.8, 134.3, 130.5 (d,  $^3J_{\text{F-C}} = 8.8$  Hz), 128.2 (d,  $^4J_{\text{F-C}} = 3.2$  Hz), 126.1, 125.71, 123.2, 118.8, 118.0, 116.0 (d,  $^2J_{\text{F-C}} = 22.0$  Hz), 74.6, 31.3, 25.2, 23.6.  $^{19}\text{F}$  NMR (376 MHz,  $\text{CDCl}_3$ )  $\delta$  -107.16. HRMS Calculated for  $\text{C}_{22}\text{H}_{20}\text{FO}_4$   $[\text{M}+\text{H}]^+$  367.1340, found: 367.1339.

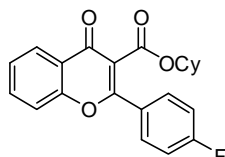

**Cyclohexyl 2-(4-chlorophenyl)-4-oxo-4*H*-chromene-3-carboxylate (7m):** 1.245 g, 35% yield, white solid, new compound, mp = 148-149 °C,  $R_f = 0.30$  (hexanes/ethyl acetate 10/1).  $^1\text{H}$  NMR (400 MHz,  $\text{CDCl}_3$ )  $\delta$  8.28 (d,  $J = 7.9$  Hz, 1H), 7.80-7.70 (m, 3H), 7.58-7.44 (m, 4H), 5.07-4.93 (m, 1H), 1.94-1.77 (m, 2H), 1.70-1.60 (m, 2H), 1.57-1.49 (m, 1H), 1.44-1.31 (m, 4H), 1.28-1.18 (m, 1H).  $^{13}\text{C}$  NMR (100 MHz,  $\text{CDCl}_3$ )  $\delta$  174.9, 164.4, 161.3, 155.8, 137.9, 134.4, 130.4, 129.6, 129.1, 126.1, 125.8, 123.2, 119.0, 118.0, 74.7, 31.2, 25.2, 23.6. HRMS Calculated for  $\text{C}_{22}\text{H}_{20}\text{ClO}_4$   $[\text{M}+\text{H}]^+$  383.1045 and 385.1015, found: 383.1050 and 385.1023.

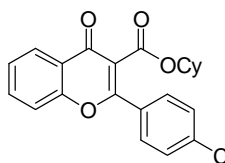



**Cyclohexyl 2-(4-bromophenyl)-4-oxo-4H-chromene-3-carboxylate (7n):** 2.709 g, 77% yield, white solid, new compound, mp = 149-150 °C,  $R_f$  = 0.30 (hexanes/ethyl acetate 10/1).  $^1\text{H}$  NMR (400 MHz,  $\text{CDCl}_3$ )  $\delta$  8.27 (d,  $J$  = 7.9 Hz, 1H), 7.78-7.61 (m, 5H), 7.56-7.42 (m, 2H), 5.08-4.90 (m, 1H), 1.94-1.75 (m, 2H), 1.69-1.60 (m, 2H), 1.56-1.48 (m, 1H), 1.45-1.30 (m, 4H), 1.29-1.19 (m, 1H).  $^{13}\text{C}$  NMR (100 MHz,  $\text{CDCl}_3$ )  $\delta$  174.9, 164.4, 161.4, 155.8, 134.4, 132.1, 130.9, 129.7, 126.3, 126.1, 125.8, 123.2, 119.0, 118.1, 74.7, 31.2, 25.3, 23.6. HRMS Calculated for  $\text{C}_{22}\text{H}_{20}\text{BrO}_4$   $[\text{M}+\text{H}]^+$  427.0539 and 429.0519, found: 427.0536 and 429.0513.

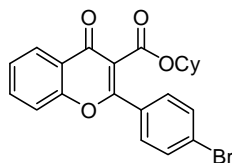

**Cyclohexyl 2-(4-methoxyphenyl)-4-oxo-4H-chromene-3-carboxylate (7o):** 1.393 g, 42% yield, yellow solid, new compound, mp = 116-117 °C,  $R_f$  = 0.30 (hexanes/ethyl acetate 5/1).  $^1\text{H}$  NMR (400 MHz,  $\text{CDCl}_3$ )  $\delta$  8.26 (d,  $J$  = 7.9 Hz, 1H), 7.77 (d,  $J$  = 8.8 Hz, 2H), 7.74-7.67 (m, 1H), 7.52 (d,  $J$  = 8.4 Hz, 1H), 7.43 (t,  $J$  = 7.5 Hz, 1H), 7.01 (d,  $J$  = 8.8 Hz, 2H), 5.09-4.95 (m, 1H), 3.89 (s, 3H), 1.97-1.76 (m, 2H), 1.70-1.62 (m, 2H), 1.57-1.48 (m, 1H), 1.47-1.31 (m, 4H), 1.28-1.18 (m, 1H).  $^{13}\text{C}$  NMR (100 MHz,  $\text{CDCl}_3$ )  $\delta$  175.1, 165.0, 162.4, 162.3, 155.8, 134.1, 130.0, 126.1, 125.4, 124.2, 123.2, 118.0, 117.9, 114.2, 74.4, 55.5, 31.3, 25.3, 23.6. HRMS Calculated for  $\text{C}_{23}\text{H}_{23}\text{O}_5$   $[\text{M}+\text{H}]^+$  379.1540, found: 379.1536.

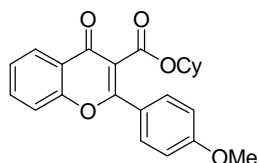

**Cyclohexyl 2-(3-methoxyphenyl)-4-oxo-4H-chromene-3-carboxylate (7p):** 1.431 g, 47% yield, pale yellow solid, new compound, mp = 114-115 °C,  $R_f$  = 0.25 (hexanes/ethyl acetate 10/1).  $^1\text{H}$  NMR (400 MHz,  $\text{CDCl}_3$ )  $\delta$  8.27 (d,  $J$  = 7.8 Hz, 1H), 7.73 (t,  $J$  = 7.6 Hz, 1H), 7.53 (d,  $J$  = 8.3 Hz, 1H), 7.48-7.34 (m, 3H), 7.31 (s, 1H), 7.10 (d,  $J$  = 7.6 Hz, 1H), 5.08-4.90 (m, 1H), 3.88 (s, 3H), 1.89-1.76 (m, 2H), 1.69-1.57 (m, 2H), 1.54-1.46 (m, 1H), 1.43-1.28 (m, 4H), 1.26-1.17 (m, 1H).  $^{13}\text{C}$  NMR (100 MHz,  $\text{CDCl}_3$ )  $\delta$  175.1, 164.5, 162.5, 159.7, 155.9, 134.3, 133.2, 129.9, 126.1, 125.6, 123.3, 120.6, 118.9, 118.1, 117.3, 113.5, 74.4, 55.5, 31.2, 25.3, 23.5. HRMS Calculated for  $\text{C}_{23}\text{H}_{23}\text{O}_5$   $[\text{M}+\text{H}]^+$  379.1540, found: 379.1536.

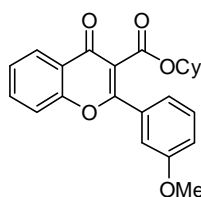

**Cyclohexyl 6-methyl-4-oxo-2-phenyl-4H-chromene-3-carboxylate (7q):** 1.738 g, 60% yield, white solid, new compound, mp = 134-135 °C,  $R_f$  = 0.30 (hexanes/ethyl acetate 10/1).  $^1\text{H}$  NMR (400 MHz,  $\text{CDCl}_3$ )  $\delta$  8.06 (s, 1H), 7.79 (d,  $J$  = 7.2 Hz, 2H), 7.60-7.48 (m, 4H), 7.43 (d,  $J$  = 8.4 Hz, 1H), 5.05-4.89 (m, 1H), 2.49 (s, 3H), 1.88-1.73 (m, 2H), 1.65-1.60 (m, 2H), 1.53-1.45 (m, 1H), 1.40-1.28 (m, 4H), 1.25-1.16 (m, 1H).  $^{13}\text{C}$  NMR (100 MHz,  $\text{CDCl}_3$ )  $\delta$  175.1, 164.7, 162.6, 154.2, 135.7, 135.5, 132.2, 131.4, 128.7, 128.2, 125.4, 122.9, 118.7, 117.8, 74.3, 31.2, 25.3, 23.5, 21.0. HRMS Calculated for  $\text{C}_{23}\text{H}_{23}\text{O}_4$   $[\text{M}+\text{H}]^+$  363.1591, found: 363.1594.

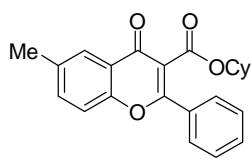

**Cyclohexyl 6-methoxy-4-oxo-2-phenyl-4H-chromene-3-carboxylate (7r):** 1.435 g, 38% yield, white solid, new compound, mp = 126-127 °C,  $R_f$  = 0.20 (hexanes/ethyl acetate 10/1).  $^1\text{H}$  NMR (400 MHz,  $\text{CDCl}_3$ )  $\delta$  7.78 (d,  $J$  = 7.2 Hz, 2H), 7.63 (d,  $J$  = 2.9 Hz, 1H), 7.59-7.45 (m, 4H), 7.34-7.29 (m, 1H), 5.05-4.92 (m, 1H), 3.92 (s, 3H), 1.88-1.76 (m, 2H), 1.68-1.58 (m, 2H), 1.54-1.46 (m, 1H), 1.41-1.28 (m, 4H), 1.26-1.16 (m, 1H).  $^{13}\text{C}$  NMR (100 MHz,  $\text{CDCl}_3$ )  $\delta$  174.9, 164.7, 162.5, 157.2, 150.7, 132.2, 131.4, 128.7, 128.2, 124.3, 123.9, 119.5, 118.1, 105.2, 74.3, 56.0, 31.2, 25.3, 23.6. HRMS Calculated for  $\text{C}_{23}\text{H}_{23}\text{O}_5$   $[\text{M}+\text{H}]^+$  379.1540, found: 379.1540.

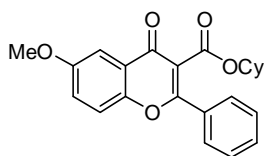

**Cyclohexyl 7-bromo-4-oxo-2-phenyl-4H-chromene-3-carboxylate (7s):** 2.721 g, 64% yield, white solid, new compound, mp = 124-125 °C,  $R_f$  = 0.40 (hexanes/ethyl acetate 10/1).  $^1\text{H}$  NMR

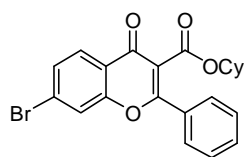

(400 MHz,  $\text{CDCl}_3$ )  $\delta$  8.14 (d,  $J$  = 8.5 Hz, 1H), 7.82-7.71 (m, 3H), 7.61-7.55 (m, 2H), 7.55-7.48 (m, 2H), 5.05-4.90 (m, 1H), 1.88-1.73 (m, 2H), 1.67-1.56 (m, 2H), 1.54-1.45 (m, 1H), 1.40-1.28 (m, 4H), 1.25-1.16 (m, 1H).  $^{13}\text{C}$  NMR (100 MHz,  $\text{CDCl}_3$ )  $\delta$  174.4, 164.1, 162.8, 155.9, 131.8, 131.6, 129.3, 128.8, 128.5, 128.2, 127.5, 122.2, 121.2, 119.1, 74.6, 31.2, 25.2, 23.5. HRMS Calculated for  $\text{C}_{22}\text{H}_{20}\text{BrO}_4$   $[\text{M}+\text{H}]^+$  427.0539 and 429.0519, found: 427.0541 and 429.0524.

**Cyclohexyl 2-methyl-4-oxo-4H-chromene-3-carboxylate (7t):** 0.404 g, 21% yield, pale yellow solid, new compound, mp = 122-123 °C,  $R_f$  = 0.40 (hexanes/ethyl acetate 10/1).  $^1\text{H}$  NMR

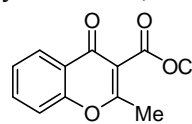

(400 MHz,  $\text{CDCl}_3$ )  $\delta$  8.22 (dd,  $J$  = 7.9, 1.6 Hz, 1H), 7.72-7.64 (m, 1H), 7.47-7.38 (m, 2H), 5.14-5.01 (m, 1H), 2.52 (s, 3H), 2.09-1.94 (m, 2H), 1.87-1.77 (m, 2H), 1.65-1.55 (m, 3H), 1.51-1.39 (m, 2H), 1.38-1.26 (m, 1H).  $^{13}\text{C}$  NMR (100 MHz,  $\text{CDCl}_3$ )  $\delta$  174.4, 166.0, 164.5, 155.6, 133.9, 126.1, 125.4, 123.4, 118.7, 117.7, 74.4, 31.6, 25.4, 23.8, 19.4. HRMS Calculated for  $\text{C}_{17}\text{H}_{19}\text{O}_4$   $[\text{M}+\text{H}]^+$  287.1278, found: 287.1277.

**Cyclohexyl 4-oxo-2-propyl-4H-chromene-3-carboxylate (7u):** 1.246 g, 28% yield, yellow oil, new compound,  $R_f$  = 0.30 (hexanes/ethyl acetate 10/1).  $^1\text{H}$  NMR (400 MHz,  $\text{CDCl}_3$ )  $\delta$  8.21 (dd,  $J$

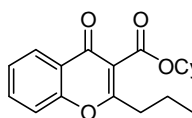

= 7.9, 1.6 Hz, 1H), 7.71-7.63 (m, 1H), 7.47-7.37 (m, 2H), 5.13-5.01 (m, 1H), 2.78-2.69 (m, 2H), 2.07-1.98 (m, 2H), 1.90-1.76 (m, 4H), 1.63-1.53 (m, 3H), 1.50-1.39 (m, 2H), 1.36-1.26 (m, 1H), 1.05 (t,  $J$  = 7.4 Hz, 3H).  $^{13}\text{C}$  NMR (100 MHz,  $\text{CDCl}_3$ )  $\delta$  174.6, 168.6, 164.5, 155.7, 133.8, 126.1, 125.4, 123.4, 118.7, 117.8, 74.4, 34.9, 31.6, 25.4, 23.8, 20.9, 13.8. HRMS Calculated for  $\text{C}_{19}\text{H}_{23}\text{O}_4$   $[\text{M}+\text{H}]^+$  315.1591, found: 315.1594.

**Cyclohexyl 2-isopropyl-4-oxo-4H-chromene-3-carboxylate (7v):** 1.506 g, 29% yield, white solid, new compound, mp = 87-88 °C,  $R_f$  = 0.30 (hexanes/ethyl acetate 10/1).  $^1\text{H}$  NMR (400 MHz,  $\text{CDCl}_3$ )  $\delta$  8.21 (d,  $J$  = 7.9 Hz, 1H), 7.72-7.64 (m, 1H), 7.50-7.37 (m, 2H),

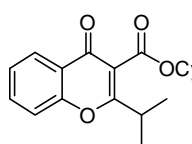

5.14-5.02 (m, 1H), 3.22-3.08 (m, 1H), 2.08-1.94 (m, 2H), 1.86-1.74 (m, 2H), 1.66-1.53 (m, 3H), 1.50-1.26 (m, 9H).  $^{13}\text{C}$  NMR (100 MHz,  $\text{CDCl}_3$ )  $\delta$  174.9, 171.5, 164.6, 155.8, 133.8, 126.0, 125.3, 123.5, 117.8, 117.5, 74.4, 32.3, 31.6, 25.4, 23.7, 19.9. HRMS Calculated for  $\text{C}_{19}\text{H}_{23}\text{O}_4$   $[\text{M}+\text{H}]^+$  315.1591, found: 315.1591.

**Cyclohexyl 2-cyclohexyl-4-oxo-4H-chromene-3-carboxylate (7w):** 2.659 g, 76% yield, yellow oil, new compound,  $R_f$  = 0.40 (hexanes/ethyl acetate 10/1).  $^1\text{H}$  NMR (400 MHz,  $\text{CDCl}_3$ )  $\delta$

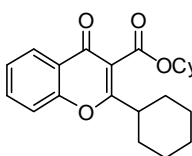

8.21 (dd,  $J$  = 8.0, 1.6 Hz, 1H), 7.71-7.63 (m, 1H), 7.49-7.35 (m, 2H), 5.15-5.03 (m, 1H), 2.86-2.71 (m, 1H), 2.07-1.85 (m, 6H), 1.84-1.67 (m, 5H), 1.64-1.53 (m, 3H), 1.50-1.26 (m, 6H).  $^{13}\text{C}$  NMR (100 MHz,  $\text{CDCl}_3$ )  $\delta$  174.9, 171.0, 164.5, 155.8, 133.8, 126.0, 125.3, 123.5, 117.8, 117.6, 74.2, 42.3, 31.6, 29.8, 25.8, 25.6, 25.4, 23.7. HRMS Calculated for  $\text{C}_{22}\text{H}_{27}\text{O}_4$   $[\text{M}+\text{H}]^+$  355.1904, found: 355.1908.

### 3.2 Lewis Acid-Promoted Biomimetic Asymmetric Reduction of Flavonoids

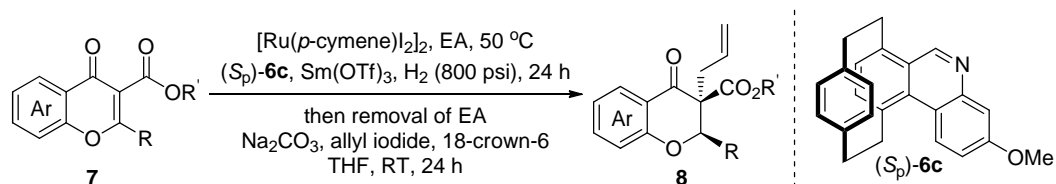

A mixture of  $[\text{Ru}(p\text{-cymene})_2]_2$  (0.7 mg, 0.00075 mmol), samarium(III) trifluoromethanesulfonate (17.9 mg, 0.03 mmol), (*S<sub>p</sub>*)-**6c** (5.1 mg, 0.015 mmol) and **7** (0.15 mmol) in ethyl acetate (3.0 mL) was stirred at room temperature for 5 min in glove box and then the mixture was transferred to an autoclave. The hydrogenation was performed at 50 °C under H<sub>2</sub> (800 psi) for 24 h. After carefully release of the hydrogen, the autoclave was opened and the reaction mixture was concentrated in *vacuo*. Then, sodium carbonate (63.6 mg, 0.60 mmol), allyl iodide (100.8 mg, 54.8 μL, 0.60 mmol), 18-crown-6 (11.8 mg, 10.2 μL, 0.045 mmol) and tetrahydrofuran (3.0 mL) were added to the mixture above. The new mixture was stirred at ambient temperature for 24 h. The reaction mixture was concentrated in *vacuo* and then purified by column chromatography on silica gel using hexanes and ethyl acetate to give **8**. The enantiomeric excesses were determined by chiral HPLC.

**(-)-Methyl 3-allyl-4-oxo-2-phenylchromane-3-carboxylate (8a)**: 46 mg, 95% yield, pale yellow oil, new compound, *R<sub>f</sub>* = 0.60 (hexanes/ethyl acetate 10/1), 93% ee,  $[\alpha]_D^{20} = -251.61$  (*c* 0.92, CHCl<sub>3</sub>), <sup>1</sup>H NMR (400 MHz, CDCl<sub>3</sub>) δ 8.00 (dd, *J* = 7.9, 1.5 Hz, 1H), 7.56-7.50 (m, 1H), 7.44-7.35 (m, 5H), 7.13-7.07 (m, 1H), 7.04 (d, *J* = 8.3 Hz, 1H), 5.83-5.68 (m, 1H), 5.51 (s, 1H), 5.29-5.16 (m, 2H), 3.60 (s, 3H), 3.22-3.11 (m, 1H), 2.41 (dd, *J* = 15.0, 9.5 Hz, 1H). <sup>13</sup>C NMR (100 MHz, CDCl<sub>3</sub>) δ 189.9, 168.9, 161.6, 136.3, 135.6, 132.8, 129.2, 128.4, 128.0, 127.4, 122.0, 121.1, 120.3, 118.2, 82.9, 61.3, 52.5, 34.5. HPLC: Chiracel AD-H column, 254 nm, 30 °C, *n*-Hexane/*i*-PrOH = 99/1, flow = 0.7 mL/min, retention time 14.4 min and 17.3 min (major). HRMS Calculated for C<sub>20</sub>H<sub>19</sub>O<sub>4</sub> [M+H]<sup>+</sup> 323.1278, found: 323.1283.

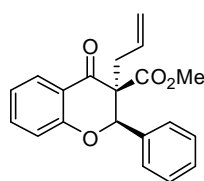

**(-)-Ethyl 3-allyl-4-oxo-2-phenylchromane-3-carboxylate (8b)**: 50 mg, 99% yield, pale yellow oil, new compound, *R<sub>f</sub>* = 0.60 (hexanes/ethyl acetate 10/1), 95% ee,  $[\alpha]_D^{20} = -255.18$  (*c* 1.00, CHCl<sub>3</sub>), <sup>1</sup>H NMR (400 MHz, CDCl<sub>3</sub>) δ 8.01 (dd, *J* = 7.9, 1.7 Hz, 1H), 7.55-7.50 (m, 1H), 7.47-7.36 (m, 5H), 7.13-7.00 (m, 2H), 5.83-5.69 (m, 1H), 5.50 (s, 1H), 5.29-5.17 (m, 2H), 4.15-3.98 (m, 2H), 3.20-3.10 (m, 1H), 2.40 (dd, *J* = 15.0, 9.4 Hz, 1H), 1.06 (t, *J* = 7.1 Hz, 3H). <sup>13</sup>C NMR (100 MHz, CDCl<sub>3</sub>) δ 190.1, 168.4, 161.6, 136.2, 135.6, 132.9, 129.2, 128.3, 127.9, 127.5, 121.9, 121.2, 120.2, 118.0, 82.9, 61.6, 61.1, 34.4, 13.8. HPLC: Chiracel AD-H column, 254 nm, 30 °C, *n*-Hexane/*i*-PrOH = 99/1, flow = 0.7 mL/min, retention time 17.4 min and 20.4 min (major). HRMS Calculated for C<sub>21</sub>H<sub>21</sub>O<sub>4</sub> [M+H]<sup>+</sup> 337.1434, found: 337.1433.

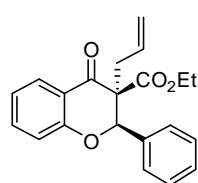

**(-)-Isopropyl 3-allyl-4-oxo-2-phenylchromane-3-carboxylate (8c)**: 48 mg, 91% yield, colorless oil, new compound, *R<sub>f</sub>* = 0.60 (hexanes/ethyl acetate 10/1), 97% ee,  $[\alpha]_D^{20} = -244.36$  (*c* 0.96, CHCl<sub>3</sub>), <sup>1</sup>H NMR (400 MHz, CDCl<sub>3</sub>) δ 8.03 (dd, *J* = 7.9, 1.6 Hz, 1H), 7.57-7.52 (m, 1H), 7.52-7.46 (m, 2H), 7.46-7.38 (m, 3H), 7.15-7.09 (m, 1H), 7.06 (dd, *J* = 8.3, 0.6 Hz, 1H), 5.90-5.71 (m, 1H), 5.52 (s, 1H), 5.30-5.18 (m, 2H), 5.02-4.87 (m, 1H), 3.21-3.07 (m, 1H), 2.41 (dd, *J* = 15.0, 9.3 Hz, 1H),

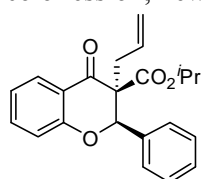

1.16 (d,  $J = 6.3$  Hz, 3H), 1.00 (d,  $J = 6.3$  Hz, 3H).  $^{13}\text{C}$  NMR (100 MHz,  $\text{CDCl}_3$ )  $\delta$  190.3, 167.9, 161.6, 136.1, 135.6, 133.0, 129.1, 128.2, 127.8, 127.7, 121.8, 121.2, 120.1, 117.9, 82.9, 69.6, 61.0, 34.3, 21.6, 21.3. HPLC: Chiracel AD-H column, 254 nm, 30 °C, *n*-Hexane/*i*-PrOH = 99/1, flow = 0.7 mL/min, retention time 11.4 min and 12.9 min (major). HRMS Calculated for  $\text{C}_{22}\text{H}_{23}\text{O}_4$   $[\text{M}+\text{H}]^+$  351.1591, found: 351.1589.

**(-)-Butyl 3-allyl-4-oxo-2-phenylchromane-3-carboxylate (8d):** 50 mg, 91% yield, colorless oil, new compound,  $R_f = 0.65$  (hexanes/ethyl acetate 10/1), 97% ee,  $[\alpha]_D^{20} = -235.38$  ( $c$  1.00,  $\text{CHCl}_3$ ),  $^1\text{H}$  NMR (400 MHz,  $\text{CDCl}_3$ )  $\delta$  8.04 (dd,  $J = 7.9, 1.7$  Hz, 1H),

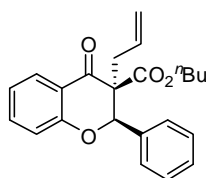

7.58-7.52 (m, 1H), 7.48-7.40 (m, 5H), 7.15-7.09 (m, 1H), 7.09-7.03 (m, 1H), 5.87-5.74 (m, 1H), 5.54 (s, 1H), 5.31-5.21 (m, 2H), 4.13-3.97 (m, 2H), 3.26-3.10 (m, 1H), 2.41 (dd,  $J = 15.0, 9.4$  Hz, 1H), 1.48-1.37 (m, 2H), 1.16-1.04 (m, 2H), 0.78 (t,  $J = 7.4$  Hz, 3H).  $^{13}\text{C}$  NMR (100 MHz,  $\text{CDCl}_3$ )  $\delta$  190.0, 168.4, 161.6, 136.1, 135.5, 132.9, 129.2, 128.3, 127.9, 127.5, 121.9, 121.2, 120.2, 118.0, 82.9, 65.4, 61.0, 34.2, 30.2, 18.8, 13.5. HPLC: Chiracel IC column, 254 nm, 30 °C, *n*-Hexane/*i*-PrOH = 99/1, flow = 1.0 mL/min, retention time 16.4 min (major) and 26.0 min. HRMS Calculated for  $\text{C}_{23}\text{H}_{25}\text{O}_4$   $[\text{M}+\text{H}]^+$  365.1747, found: 365.1745.

**(-)-tert-Butyl 3-allyl-4-oxo-2-phenylchromane-3-carboxylate (8e):** 52 mg, 95% yield, pale yellow solid, new compound, mp = 79-80 °C,  $R_f = 0.70$  (hexanes/ethyl acetate 10/1), 98% ee,

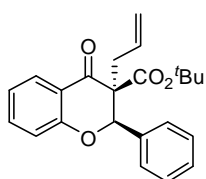

$[\alpha]_D^{20} = -224.50$  ( $c$  1.04,  $\text{CHCl}_3$ ),  $^1\text{H}$  NMR (400 MHz,  $\text{CDCl}_3$ )  $\delta$  8.03 (dd,  $J = 7.9, 1.6$  Hz, 1H), 7.56-7.51 (m, 3H), 7.44-7.41 (m, 3H), 7.13-7.08 (m, 1H), 7.06 (dd,  $J = 8.3, 0.6$  Hz, 1H), 5.88-5.77 (m, 1H), 5.49 (s, 1H), 5.26-5.20 (m, 2H), 3.14-3.07 (m, 1H), 2.36 (dd,  $J = 15.0, 9.2$  Hz, 1H), 1.29 (s, 9H).  $^{13}\text{C}$  NMR (100 MHz,  $\text{CDCl}_3$ )  $\delta$  190.5, 167.3, 161.5, 135.9, 135.5, 133.2, 129.1, 128.1, 127.8, 127.8, 121.7, 121.3, 119.9, 117.7, 83.1, 82.8, 61.4, 34.3, 27.7. HPLC: Chiracel AD-H column, 254 nm, 30 °C, *n*-Hexane/*i*-PrOH = 99/1, flow = 0.5 mL/min, retention time 11.9 min and 16.6 min (major). HRMS Calculated for  $\text{C}_{23}\text{H}_{24}\text{NaO}_4$   $[\text{M}+\text{Na}]^+$  387.1567, found: 387.1569.

**(-)-Benzyl 3-allyl-4-oxo-2-phenylchromane-3-carboxylate (8f):** 50 mg, 84% yield, pale yellow solid, new compound, mp = 86-87 °C,  $R_f = 0.50$  (hexanes/ethyl acetate 10/1), 98% ee,

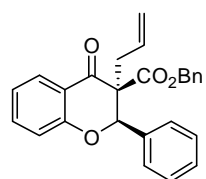

$[\alpha]_D^{20} = -230.98$  ( $c$  1.00,  $\text{CHCl}_3$ ),  $^1\text{H}$  NMR (400 MHz,  $\text{CDCl}_3$ )  $\delta$  8.02 (dd,  $J = 7.9, 1.5$  Hz, 1H), 7.55-7.49 (m, 1H), 7.37-7.20 (m, 8H), 7.12-6.99 (m, 4H), 5.83-5.70 (m, 1H), 5.51 (s, 1H), 5.26-5.18 (m, 2H), 5.16 (d,  $J = 12.6$  Hz, 1H), 4.94 (d,  $J = 12.6$  Hz, 1H), 3.24-3.13 (m, 1H), 2.39 (dd,  $J = 15.0, 9.4$  Hz, 1H).  $^{13}\text{C}$  NMR (100 MHz,  $\text{CDCl}_3$ )  $\delta$  189.8, 168.2, 161.6, 136.2, 135.3, 135.0, 132.8, 129.2, 128.4, 128.3, 128.1, 128.0, 127.8, 127.5, 122.0, 121.2, 120.3, 118.1, 83.0, 67.1, 61.1, 34.3. HPLC: Chiracel AD-H column, 254 nm, 30 °C, *n*-Hexane/*i*-PrOH = 97/3, flow = 0.7 mL/min, retention time 16.6 min (major) and 20.0 min. HRMS Calculated for  $\text{C}_{26}\text{H}_{23}\text{O}_4$   $[\text{M}+\text{H}]^+$  399.1591, found: 399.1589.

**(-)-Cyclohexyl 3-allyl-4-oxo-2-phenylchromane-3-carboxylate (8g):** 55 mg, 94% yield, pale yellow solid, new compound, mp = 59-60 °C,  $R_f = 0.60$  (hexanes/ethyl acetate 10/1), 98% ee,  $[\alpha]_D^{20} = -240.44$  ( $c$  1.10,  $\text{CHCl}_3$ ),  $^1\text{H}$  NMR (400 MHz,  $\text{CDCl}_3$ )  $\delta$  8.05 (dd,  $J = 7.9, 1.6$  Hz, 1H), 7.57-7.52 (m, 1H), 7.51-7.46 (m, 2H), 7.45-7.39 (m, 3H), 7.12 (t,  $J = 7.5$  Hz, 1H), 7.07 (d,  $J = 8.3$  Hz, 1H), 5.88-5.75 (m, 1H), 5.53 (s, 1H), 5.30-5.21 (m, 2H), 4.92-4.82 (m, 1H), 3.21-3.11 (m, 1H),

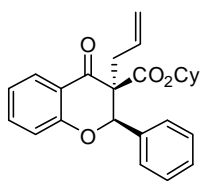

2.40 (dd,  $J = 15.1, 9.4$  Hz, 1H), 1.72-1.64 (m, 1H), 1.55-1.46 (m, 2H), 1.40-1.14 (m, 7H).  $^{13}\text{C}$  NMR (100 MHz,  $\text{CDCl}_3$ )  $\delta$  190.2, 167.7, 161.6, 136.0, 135.5, 133.0, 129.2, 128.2, 127.8, 127.7, 121.8, 121.4, 120.1, 117.9, 83.0, 73.5, 61.0, 34.1, 30.9, 30.6, 25.2, 22.4, 22.3. HPLC: Chiracel AD-H column, 254 nm, 30 °C, *n*-Hexane/*i*-PrOH = 99/1, flow = 0.5 mL/min, retention time 25.4 min and 27.5 min (major). HRMS Calculated for  $\text{C}_{25}\text{H}_{27}\text{O}_4$   $[\text{M}+\text{H}]^+$  391.1904, found: 391.1904.

**(-)-Cyclohexyl 3-allyl-4-oxo-2-(*p*-tolyl)chromane-3-carboxylate (8h):** 57 mg, 94% yield, pale yellow oil, new compound,  $R_f = 0.60$  (hexanes/ethyl acetate 10/1), 97% ee,  $[\alpha]_D^{20} = -203.58$  (*c*

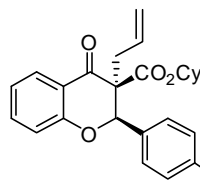

1.14,  $\text{CHCl}_3$ ),  $^1\text{H}$  NMR (400 MHz,  $\text{CDCl}_3$ )  $\delta$  8.04 (dd,  $J = 7.9, 1.7$  Hz, 1H), 7.56-7.51 (m, 1H), 7.37 (d,  $J = 8.1$  Hz, 2H), 7.23 (d,  $J = 8.0$  Hz, 2H), 7.13-7.04 (m, 2H), 5.87-5.75 (m, 1H), 5.49 (s, 1H), 5.28-5.20 (m, 2H), 4.93-4.84 (m, 1H), 3.21-3.10 (m, 1H), 2.44-2.35 (m, 1H), 2.41 (s, 3H), 1.72-1.65 (m, 1H), 1.56-1.47 (m, 2H), 1.42-1.29 (m, 4H), 1.25-1.11 (m, 3H).  $^{13}\text{C}$  NMR (100 MHz,  $\text{CDCl}_3$ )  $\delta$  190.3, 167.8, 161.7, 139.0, 135.9, 133.1, 132.5, 128.9, 127.8, 127.6, 121.7, 121.4, 120.0, 117.9, 83.0, 73.4, 61.0, 34.2, 30.9, 30.6, 25.2, 22.4, 22.3, 21.3. HPLC: Chiracel IC column, 254 nm, 30 °C, *n*-Hexane/*i*-PrOH = 99/1, flow = 1.0 mL/min, retention time 10.7 min (major) and 18.6 min. HRMS Calculated for  $\text{C}_{26}\text{H}_{29}\text{O}_4$   $[\text{M}+\text{H}]^+$  405.2060, found: 405.2064.

**(-)-Cyclohexyl 3-allyl-4-oxo-2-(*m*-tolyl)chromane-3-carboxylate (8i):** 57 mg, 94% yield, white solid, new compound, mp = 59-60 °C,  $R_f = 0.60$  (hexanes/ethyl acetate 10/1), 97% ee,  $[\alpha]_D^{20}$

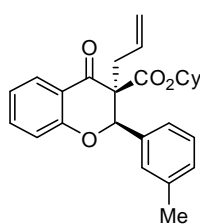

= -224.28 (*c* 1.14,  $\text{CHCl}_3$ ),  $^1\text{H}$  NMR (400 MHz,  $\text{CDCl}_3$ )  $\delta$  8.04 (dd,  $J = 7.9, 1.7$  Hz, 1H), 7.58-7.51 (m, 1H), 7.34-7.21 (m, 4H), 7.14-7.05 (m, 2H), 5.87-5.75 (m, 1H), 5.50 (s, 1H), 5.29-5.22 (m, 2H), 4.91-4.83 (m, 1H), 3.22-3.12 (m, 1H), 2.44-2.36 (m, 1H), 2.40 (s, 3H), 1.74-1.66 (m, 1H), 1.59-1.46 (m, 2H), 1.43-1.13 (m, 7H).  $^{13}\text{C}$  NMR (100 MHz,  $\text{CDCl}_3$ )  $\delta$  190.2, 167.7, 161.7, 137.9, 136.0, 135.4, 133.1, 129.9, 128.2, 128.1, 127.8, 124.7, 121.7, 121.3, 120.1, 117.9, 82.9, 73.5, 61.0, 34.1, 30.9, 30.6, 25.2, 22.5, 22.3, 21.5. HPLC: Chiracel IC column, 254 nm, 30 °C, *n*-Hexane/*i*-PrOH = 99/1, flow = 1.0 mL/min, retention time 10.7 min (major) and 16.8 min. HRMS Calculated for  $\text{C}_{26}\text{H}_{29}\text{O}_4$   $[\text{M}+\text{H}]^+$  405.2060, found: 405.2062.

**(-)-Cyclohexyl 3-allyl-4-oxo-2-(*o*-tolyl)chromane-3-carboxylate (8j):** 24 mg, 40% yield, colorless oil, new compound,  $R_f = 0.70$  (hexanes/ethyl acetate 10/1), 92% ee,  $[\alpha]_D^{20} = -58.54$  (*c*

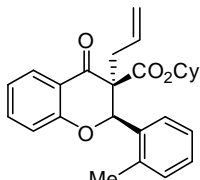

0.48,  $\text{CHCl}_3$ ),  $^1\text{H}$  NMR (400 MHz,  $\text{CDCl}_3$ )  $\delta$  8.04 (dd,  $J = 7.9, 1.6$  Hz, 1H), 7.55-7.48 (m, 2H), 7.34-7.21 (m, 3H), 7.10 (t,  $J = 7.5$  Hz, 1H), 7.02 (d,  $J = 8.3$  Hz, 1H), 5.88-5.76 (m, 1H), 5.70 (s, 1H), 5.07 (d,  $J = 10.1$  Hz, 1H), 4.98 (dd,  $J = 17.1, 1.3$  Hz, 1H), 4.95-4.86 (m, 1H), 3.01 (dd,  $J = 14.6, 6.2$  Hz, 1H), 2.54 (dd,  $J = 14.6, 7.8$  Hz, 1H), 2.41 (s, 3H), 1.71-1.62 (m, 1H), 1.58-1.49 (m, 1H), 1.48-1.27 (m, 5H), 1.26-1.17 (m, 3H).  $^{13}\text{C}$  NMR (100 MHz,  $\text{CDCl}_3$ )  $\delta$  190.4, 168.2, 161.5, 137.3, 135.8, 133.4, 132.8, 131.0, 129.1, 127.9, 126.0, 121.7, 121.3, 119.3, 117.7, 80.1, 73.6, 60.4, 34.9, 30.8, 30.6, 25.2, 22.5, 22.4, 20.0. HPLC: Chiracel IC column, 254 nm, 30 °C, *n*-Hexane/*i*-PrOH = 99/1, flow = 1.0 mL/min, retention time 15.0 min (major) and 18.2 min. HRMS Calculated for  $\text{C}_{26}\text{H}_{29}\text{O}_4$   $[\text{M}+\text{H}]^+$  405.2060, found: 405.2061.

**(2R,3S)-(-)-Cyclohexyl 3-allyl-2-(naphthalen-2-yl)-4-oxochromane-3-carboxylate (8k):** 60 mg, 91% yield, pale yellow solid, new compound, mp = 107-108 °C,  $R_f$  = 0.60 (hexanes/ethyl acetate 10/1), 97% ee,  $[\alpha]_D^{20}$  = -249.65 ( $c$  1.20,  $\text{CHCl}_3$ ),  $^1\text{H NMR}$  (400 MHz,  $\text{CDCl}_3$ )  $\delta$  8.08 (dd,  $J$  = 7.9, 1.6 Hz, 1H), 7.98 (s, 1H), 7.94-7.83 (m, 3H), 7.63-7.52 (m, 4H), 7.19-7.07 (m, 2H), 5.97-5.80 (m, 1H), 5.70 (s, 1H), 5.36-5.24 (m, 2H), 4.97-4.82 (m, 1H), 3.30-3.10 (m, 1H), 2.45 (dd,  $J$  = 15.1, 9.5 Hz, 1H), 1.79-1.65 (m, 1H), 1.62-1.39 (m, 3H), 1.39-1.25 (m, 3H), 1.24-1.11 (m, 3H).  $^{13}\text{C NMR}$  (100 MHz,  $\text{CDCl}_3$ )  $\delta$  190.2, 167.8, 161.7, 136.1, 133.6, 133.2, 132.9, 132.8, 128.2, 128.0, 127.9, 127.8, 127.4, 126.6, 126.4, 124.9, 121.9, 121.4, 120.1, 117.9, 83.1, 73.6, 61.1, 34.2, 31.0, 30.6, 25.2, 22.5, 22.3. HPLC: Chiracel IC column, 254 nm, 30 °C,  $n$ -Hexane/ $i$ -PrOH = 99/1, flow = 1.0 mL/min, retention time 13.1 min (major) and 22.7 min. HRMS Calculated for  $\text{C}_{29}\text{H}_{29}\text{O}_4$   $[\text{M}+\text{H}]^+$  441.2060, found: 441.2057.

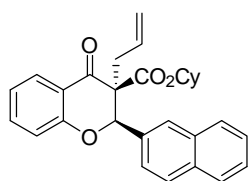

**(-)-Cyclohexyl 3-allyl-2-(4-fluorophenyl)-4-oxochromane-3-carboxylate (8l):** 58 mg, 95% yield, pale yellow solid, new compound, mp = 71-72 °C,  $R_f$  = 0.60 (hexanes/ethyl acetate 10/1), 99% ee,  $[\alpha]_D^{20}$  = -210.76 ( $c$  1.16,  $\text{CHCl}_3$ ),  $^1\text{H NMR}$  (400 MHz,  $\text{CDCl}_3$ )  $\delta$  8.04 (dd,  $J$  = 7.9, 1.7 Hz, 1H), 7.58-7.52 (m, 1H), 7.50-7.43 (m, 2H), 7.15-7.03 (m, 4H), 5.86-5.74 (m, 1H), 5.50 (s, 1H), 5.27-5.18 (m, 2H), 4.91-4.81 (m, 1H), 3.22-3.09 (m, 1H), 2.36 (dd,  $J$  = 15.1, 9.5 Hz, 1H), 1.71-1.63 (m, 1H), 1.55-1.43 (m, 2H), 1.40-1.26 (m, 4H), 1.26-1.15 (m, 3H).  $^{13}\text{C NMR}$  (100 MHz,  $\text{CDCl}_3$ )  $\delta$  189.9, 167.6, 163.0 (d,  $^1J_{\text{F-C}}$  = 246.6 Hz), 161.4, 136.0, 133.0, 131.4 (d,  $^4J_{\text{F-C}}$  = 3.3 Hz), 129.5 (d,  $^3J_{\text{F-C}}$  = 8.3 Hz), 127.8, 121.9, 121.3, 120.1, 117.8, 115.2 (d,  $^2J_{\text{F-C}}$  = 21.5 Hz), 82.4, 73.6, 61.0, 34.1, 31.0, 30.6, 25.2, 22.4, 22.3.  $^{19}\text{F NMR}$  (376 MHz,  $\text{CDCl}_3$ )  $\delta$  -112.23. HPLC: Chiracel IC column, 254 nm, 30 °C,  $n$ -Hexane/ $i$ -PrOH = 99/1, flow = 1.0 mL/min, retention time 8.8 min (major) and 13.4 min. HRMS Calculated for  $\text{C}_{25}\text{H}_{26}\text{FO}_4$   $[\text{M}+\text{H}]^+$  409.1810, found: 409.1808.

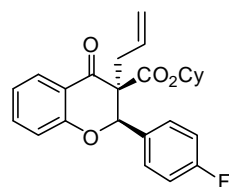

**(-)-Cyclohexyl 3-allyl-2-(4-chlorophenyl)-4-oxochromane-3-carboxylate (8m):** 58 mg, 91% yield, yellow oil, new compound,  $R_f$  = 0.65 (hexanes/ethyl acetate 10/1), 98% ee,  $[\alpha]_D^{20}$  = -201.11 ( $c$  1.16,  $\text{CHCl}_3$ ),  $^1\text{H NMR}$  (400 MHz,  $\text{CDCl}_3$ )  $\delta$  8.04 (dd,  $J$  = 7.9, 1.6 Hz, 1H), 7.58-7.51 (m, 1H), 7.45-7.37 (m, 4H), 7.13 (t,  $J$  = 7.5 Hz, 1H), 7.05 (d,  $J$  = 8.3 Hz, 1H), 5.85-5.72 (m, 1H), 5.49 (s, 1H), 5.28-5.18 (m, 2H), 4.90-4.80 (m, 1H), 3.24-3.09 (m, 1H), 2.37 (dd,  $J$  = 15.1, 9.4 Hz, 1H), 1.72-1.62 (m, 1H), 1.56-1.41 (m, 2H), 1.39-1.25 (m, 4H), 1.24-1.06 (m, 3H).  $^{13}\text{C NMR}$  (100 MHz,  $\text{CDCl}_3$ )  $\delta$  189.8, 167.5, 161.4, 136.1, 135.0, 134.0, 132.9, 129.1, 128.4, 127.8, 122.0, 121.3, 120.2, 117.8, 82.3, 73.7, 60.9, 34.1, 31.0, 30.6, 25.2, 22.4, 22.3. HPLC: Chiracel IC column, 254 nm, 30 °C,  $n$ -Hexane/ $i$ -PrOH = 99/1, flow = 1.0 mL/min, retention time 8.9 min (major) and 13.9 min. HRMS Calculated for  $\text{C}_{25}\text{H}_{26}\text{ClO}_4$   $[\text{M}+\text{H}]^+$  425.1514 and 427.1485, found: 425.1515 and 427.1496.

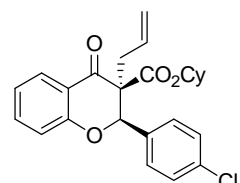

**(-)-Cyclohexyl 3-allyl-2-(4-bromophenyl)-4-oxochromane-3-carboxylate (8n):** 64 mg, 91% yield, pale yellow oil, new compound,  $R_f$  = 0.60 (hexanes/ethyl acetate 10/1), 99% ee,  $[\alpha]_D^{20}$  = -187.49 ( $c$  1.28,  $\text{CHCl}_3$ ),  $^1\text{H NMR}$  (400 MHz,  $\text{CDCl}_3$ )  $\delta$  8.04 (dd,  $J$  = 7.9, 1.6 Hz, 1H), 7.58-7.51 (m, 3H), 7.39-7.33 (m, 2H), 7.15-7.10 (m, 1H), 7.05 (dd,  $J$  = 8.3, 0.6 Hz, 1H), 5.85-5.72 (m, 1H), 5.48 (s, 1H), 5.28-5.17 (m, 2H), 4.90-4.79 (m, 1H), 3.26-3.04 (m, 1H), 2.37 (dd,  $J$  = 15.1, 9.4 Hz,

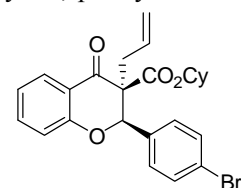

1H), 1.73-1.60 (m, 1H), 1.55-1.41 (m, 2H), 1.38-1.26 (m, 4H), 1.24-1.09 (m, 3H). <sup>13</sup>C NMR (100 MHz, CDCl<sub>3</sub>) δ 189.8, 167.5, 161.3, 136.1, 134.5, 132.9, 131.4, 129.3, 127.8, 123.2, 122.0, 121.3, 120.2, 117.8, 82.3, 73.7, 60.8, 34.1, 31.0, 30.6, 25.2, 22.4, 22.3. HPLC: Chiracel IC column, 254 nm, 30 °C, *n*-Hexane/*i*-PrOH = 99/1, flow = 1.0 mL/min, retention time 8.8 min (major) and 14.2 min. HRMS Calculated for C<sub>25</sub>H<sub>26</sub>BrO<sub>4</sub> [M+H]<sup>+</sup> 469.1009 and 471.0989, found: 469.1015 and 471.1002.

**(-)-Cyclohexyl 3-allyl-2-(4-methoxyphenyl)-4-oxochromane-3-carboxylate (8o):** 62 mg, 98% yield, pale yellow oil, new compound, R<sub>f</sub> = 0.40 (hexanes/ethyl acetate 10/1), 90% ee, [α]<sup>20</sup><sub>D</sub> = -209.99 (*c* 1.24, CHCl<sub>3</sub>), <sup>1</sup>H NMR (400 MHz, CDCl<sub>3</sub>) δ 8.03 (dd, *J* = 7.9, 1.6 Hz, 1H), 7.56-7.50 (m, 1H), 7.42-7.36 (m, 2H), 7.13-7.08 (m, 1H), 7.05 (dd, *J* = 8.3, 0.6 Hz, 1H), 6.97-6.90 (m, 2H), 5.88-5.69 (m, 1H), 5.46 (s, 1H), 5.26-5.17 (m, 2H), 4.93-4.81 (m, 1H), 3.86 (s, 3H), 3.20-3.05 (m, 1H), 2.37 (dd, *J* = 15.0, 9.4 Hz, 1H), 1.72-1.63 (m, 1H), 1.56-1.44 (m, 2H), 1.37-1.25 (m, 4H), 1.24-1.12 (m, 3H). <sup>13</sup>C NMR (100 MHz, CDCl<sub>3</sub>) δ 190.3, 167.8, 161.7, 160.1, 135.9, 133.1, 129.0, 127.8, 127.6, 121.7, 121.4, 120.0, 117.9, 113.6, 82.8, 73.4, 61.0, 55.3, 34.2, 30.9, 30.6, 25.2, 22.4, 22.3. HPLC: Chiracel IC column, 254 nm, 30 °C, *n*-Hexane/*i*-PrOH = 99/1, flow = 1.0 mL/min, retention time 13.0 min (major) and 22.8 min. HRMS Calculated for C<sub>26</sub>H<sub>29</sub>O<sub>5</sub> [M+H]<sup>+</sup> 421.2010, found: 421.2011.

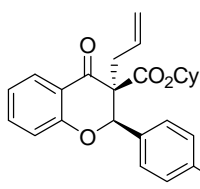

**(-)-Cyclohexyl 3-allyl-2-(3-methoxyphenyl)-4-oxochromane-3-carboxylate (8p):** 62 mg, 98% yield, pale yellow oil, new compound, R<sub>f</sub> = 0.50 (hexanes/ethyl acetate 10/1), 98% ee, [α]<sup>20</sup><sub>D</sub> = -230.06 (*c* 1.24, CHCl<sub>3</sub>), <sup>1</sup>H NMR (400 MHz, CDCl<sub>3</sub>) δ 8.04 (dd, *J* = 7.9, 1.6 Hz, 1H), 7.58-7.52 (m, 1H), 7.33 (t, *J* = 7.9 Hz, 1H), 7.14-7.03 (m, 4H), 6.95 (dd, *J* = 8.2, 2.3 Hz, 1H), 5.86-5.75 (m, 1H), 5.50 (s, 1H), 5.31-5.22 (m, 2H), 4.91-4.82 (m, 1H), 3.83 (s, 3H), 3.24-3.14 (m, 1H), 2.43 (dd, *J* = 15.1, 9.5 Hz, 1H), 1.74-1.64 (m, 1H), 1.57-1.44 (m, 2H), 1.39-1.25 (m, 4H), 1.24-1.10 (m, 3H). <sup>13</sup>C NMR (100 MHz, CDCl<sub>3</sub>) δ 190.1, 167.7, 161.6, 159.4, 136.9, 136.0, 133.1, 129.3, 127.8, 121.8, 121.3, 120.1, 119.9, 117.9, 114.5, 113.5, 82.8, 73.5, 61.0, 55.2, 34.1, 30.9, 30.5, 25.2, 22.4, 22.2. HPLC: Chiracel IC column, 254 nm, 30 °C, *n*-Hexane/*i*-PrOH = 98/2, flow = 0.8 mL/min, retention time 12.5 min (major) and 18.2 min. HRMS Calculated for C<sub>26</sub>H<sub>29</sub>O<sub>5</sub> [M+H]<sup>+</sup> 421.2010, found: 421.2015.

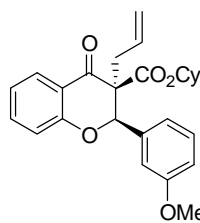

**(-)-Cyclohexyl 3-allyl-6-methyl-4-oxo-2-phenylchromane-3-carboxylate (8q):** 59 mg, 97% yield, pale yellow solid, new compound, mp = 104-105 °C, R<sub>f</sub> = 0.60 (hexanes/ethyl acetate 10/1), 98% ee, [α]<sup>20</sup><sub>D</sub> = -224.73 (*c* 1.18, CHCl<sub>3</sub>), <sup>1</sup>H NMR (400 MHz, CDCl<sub>3</sub>) δ 7.83 (d, *J* = 1.7 Hz, 1H), 7.50-7.46 (m, 2H), 7.45-7.38 (m, 3H), 7.35 (dd, *J* = 8.4, 2.2 Hz, 1H), 6.97 (d, *J* = 8.4 Hz, 1H), 5.86-5.74 (m, 1H), 5.49 (s, 1H), 5.29-5.19 (m, 2H), 4.89-4.79 (m, 1H), 3.23-3.09 (m, 1H), 2.45-2.35 (m, 1H), 2.38 (s, 3H), 1.76-1.65 (m, 1H), 1.55-1.38 (m, 3H), 1.38-1.26 (m, 3H), 1.26-1.20 (m, 3H). <sup>13</sup>C NMR (100 MHz, CDCl<sub>3</sub>) δ 190.4, 167.8, 159.7, 137.1, 135.7, 133.1, 131.2, 129.1, 128.2, 127.6, 127.3, 121.0, 120.0, 117.7, 82.9, 73.5, 61.0, 34.2, 31.0, 30.7, 25.2, 22.6, 22.4, 20.5. HPLC: Chiracel IC column, 254 nm, 30 °C, *n*-Hexane/*i*-PrOH = 99/1, flow = 1.0 mL/min, retention time 11.4 min (major) and 21.6 min. HRMS Calculated for C<sub>26</sub>H<sub>29</sub>O<sub>4</sub> [M+H]<sup>+</sup> 405.2060, found: 405.2060.

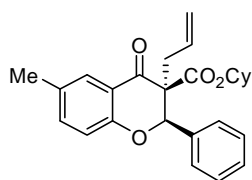

**(-)-Cyclohexyl 3-allyl-6-methoxy-4-oxo-2-phenylchromane-3-carboxylate (8r):** 59 mg, 94% yield, yellow solid, new compound, mp = 120-121 °C,  $R_f$  = 0.50 (hexanes/ethyl acetate 10/1), 98% ee,  $[\alpha]_D^{20}$  = -209.22 (*c* 1.18, CHCl<sub>3</sub>), <sup>1</sup>H NMR (400 MHz, CDCl<sub>3</sub>) δ

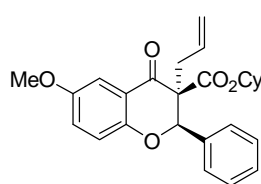

7.49-7.44 (m, 3H), 7.44-7.38 (m, 3H), 7.16 (dd, *J* = 9.0, 3.2 Hz, 1H), 7.00 (d, *J* = 9.0 Hz, 1H), 5.86-5.75 (m, 1H), 5.48 (s, 1H), 5.29-5.21 (m, 2H), 4.89-4.81 (m, 1H), 3.86 (s, 3H), 3.20-3.11 (m, 1H), 2.40 (dd, *J* = 15.0, 9.3 Hz, 1H), 1.75-1.67 (m, 1H), 1.55-1.46 (m, 2H), 1.45-1.38 (m, 1H), 1.37-1.27 (m, 3H), 1.26-1.20 (m, 3H). <sup>13</sup>C NMR (100 MHz, CDCl<sub>3</sub>) δ 190.3, 167.8, 156.4, 154.4, 135.6, 133.1, 129.1, 128.2, 127.6, 125.3, 121.2, 120.0, 119.2, 108.0, 83.1, 73.6, 60.9, 55.9, 34.2, 31.0, 30.7, 25.2, 22.6, 22.5. HPLC: Chiracel IC column, 254 nm, 30 °C, *n*-Hexane/*i*-PrOH = 99/1, flow = 1.0 mL/min, retention time 16.2 min (major) and 24.3 min. HRMS Calculated for C<sub>26</sub>H<sub>29</sub>O<sub>5</sub> [M+H]<sup>+</sup> 421.2010, found: 421.2015.

**(-)-Cyclohexyl 3-allyl-7-bromo-4-oxo-2-phenylchromane-3-carboxylate (8s):** 55 mg, 78% yield, pale yellow oil, new compound,  $R_f$  = 0.65 (hexanes/ethyl acetate 10/1), 67% ee,  $[\alpha]_D^{20}$  = -131.17 (*c* 1.10, CHCl<sub>3</sub>), <sup>1</sup>H NMR (400 MHz, CDCl<sub>3</sub>) δ 7.89 (d, *J* = 8.4 Hz,

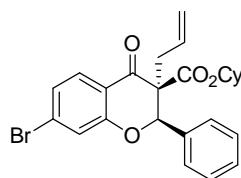

1H), 7.47-7.41 (m, 5H), 7.29-7.24 (m, 2H), 5.83-5.72 (m, 1H), 5.51 (s, 1H), 5.28-5.22 (m, 2H), 4.88-4.81 (m, 1H), 3.19-3.11 (m, 1H), 2.38 (dd, *J* = 15.1, 9.4 Hz, 1H), 1.77-1.65 (m, 1H), 1.58-1.45 (m, 2H), 1.43-1.31 (m, 3H), 1.29-1.20 (m, 4H). <sup>13</sup>C NMR (100 MHz, CDCl<sub>3</sub>) δ 189.4, 167.4, 161.7, 135.0, 132.7, 130.5, 129.3, 129.0, 128.3, 127.6, 125.5, 121.1, 120.3, 120.3, 83.3, 73.8, 60.9, 34.0, 31.0, 30.6, 25.2, 22.6, 22.5. HPLC: Chiracel IC column, 254 nm, 30 °C, *n*-Hexane/*i*-PrOH = 99/1, flow = 1.0 mL/min, retention time 8.2 min (major) and 10.4 min. HRMS Calculated for C<sub>25</sub>H<sub>26</sub>BrO<sub>4</sub> [M+H]<sup>+</sup> 469.1009 and 471.0992, found: 469.1014 and 471.0997.

**(-)-Cyclohexyl 3-allyl-2-methyl-4-oxochromane-3-carboxylate (8t):** 49 mg, 99% yield, pale yellow oil, new compound,  $R_f$  = 0.70 (hexanes/ethyl acetate 10/1), 82% ee,  $[\alpha]_D^{20}$  = -36.08 (*c* 0.92,

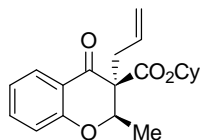

CHCl<sub>3</sub>), <sup>1</sup>H NMR (400 MHz, CDCl<sub>3</sub>) δ 7.97 (dd, *J* = 7.9, 1.6 Hz, 1H), 7.51-7.45 (m, 1H), 7.07-7.01 (m, 1H), 6.96 (dd, *J* = 8.3, 0.6 Hz, 1H), 5.73-5.62 (m, 1H), 5.24-5.17 (m, 1H), 5.13-5.07 (m, 1H), 4.88-4.79 (m, 1H), 4.52 (q, *J* = 6.5 Hz, 1H), 3.28-3.19 (m, 1H), 2.59 (dd, *J* = 14.4, 9.5 Hz, 1H), 1.61-1.51 (m, 5H), 1.39-1.24 (m, 5H), 1.24-1.17 (m, 3H). <sup>13</sup>C NMR (100 MHz, CDCl<sub>3</sub>) δ 190.2, 168.3, 161.4, 135.6, 132.3, 127.7, 121.6, 121.4, 119.4, 117.5, 77.9, 73.4, 59.7, 34.0, 30.7, 30.7, 25.2, 22.3, 22.2, 15.7. HPLC: Chiracel IC column, 254 nm, 30 °C, *n*-Hexane/*i*-PrOH = 99/1, flow = 1.0 mL/min, retention time 6.8 min (major) and 9.1 min. HRMS Calculated for C<sub>20</sub>H<sub>25</sub>O<sub>4</sub> [M+H]<sup>+</sup> 329.1747, found: 329.1750.

**(-)-Cyclohexyl 3-allyl-4-oxo-2-propylchromane-3-carboxylate (8u):** 53 mg, 99% yield, pale yellow oil, new compound,  $R_f$  = 0.60 (hexanes/ethyl acetate 10/1), 91% ee,  $[\alpha]_D^{20}$  = -30.28 (*c* 1.06,

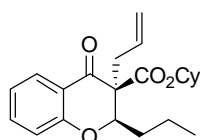

CHCl<sub>3</sub>), <sup>1</sup>H NMR (400 MHz, CDCl<sub>3</sub>) δ 7.97 (dd, *J* = 7.9, 1.7 Hz, 1H), 7.52-7.44 (m, 1H), 7.07-7.01 (m, 1H), 6.97 (d, *J* = 8.3 Hz, 1H), 5.73-5.59 (m, 1H), 5.19 (dd, *J* = 17.1, 0.6 Hz, 1H), 5.14-5.07 (m, 1H), 4.89-4.79 (m, 1H), 4.35 (dd, *J* = 9.6, 2.7 Hz, 1H), 3.30-3.20 (m, 1H), 2.64 (dd, *J* = 14.4, 9.5 Hz, 1H), 1.93-1.80 (m, 2H), 1.79-1.71 (m, 1H), 1.59-1.42 (m, 3H), 1.39-1.18 (m, 8H), 0.99 (t, *J* = 7.3 Hz, 3H). <sup>13</sup>C NMR (100 MHz, CDCl<sub>3</sub>) δ 190.3, 168.5, 161.4, 135.6, 132.3, 127.7, 121.6, 121.3, 119.5, 117.5, 81.2, 73.3, 59.4, 34.1, 31.4, 30.7, 25.2, 22.3, 22.3, 19.2, 13.8. HPLC: Chiracel IC



column, 254 nm, 30 °C, *n*-Hexane/*i*-PrOH = 99/1, flow = 1.0 mL/min, retention time 6.8 min (major) and 10.9 min. HRMS Calculated for C<sub>22</sub>H<sub>29</sub>O<sub>4</sub> [M+H]<sup>+</sup> 357.2060, found: 357.2060.

**(-)-Cyclohexyl 3-allyl-2-isopropyl-4-oxochromane-3-carboxylate (8v):** 52 mg, 97% yield, colorless solid, new compound, mp = 45-46 °C, R<sub>f</sub> = 0.60 (hexanes/ethyl acetate 10/1), 95% ee,

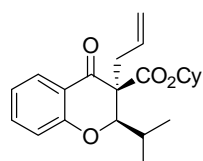

[α]<sub>D</sub><sup>20</sup> = -111.43 (*c* 1.04, CHCl<sub>3</sub>), <sup>1</sup>H NMR (400 MHz, CDCl<sub>3</sub>) δ 8.02-7.90 (m, 1H), 7.54-7.46 (m, 1H), 7.08-6.98 (m, 2H), 5.69-5.55 (m, 1H), 5.24-5.15 (m, 1H), 5.13-5.06 (m, 1H), 4.90-4.79 (m, 1H), 4.29 (d, *J* = 1.6 Hz, 1H), 3.37-3.26 (m, 1H), 2.71 (dd, *J* = 14.6, 9.8 Hz, 1H), 2.38-2.24 (m, 1H), 1.62-1.53 (m, 1H), 1.51-1.39 (m, 2H), 1.31-1.14 (m, 9H), 1.09-0.99 (m, 4H). <sup>13</sup>C NMR (100 MHz, CDCl<sub>3</sub>) δ 190.4, 169.0, 162.2, 135.6, 132.7, 127.8, 121.2, 121.1, 119.4, 117.5, 84.7, 73.2, 58.9, 34.2, 30.6, 30.5, 27.9, 25.2, 22.2, 22.1, 22.0, 15.3. HPLC: Chiracel IC column, 254 nm, 30 °C, *n*-Hexane/*i*-PrOH = 99/1, flow = 1.0 mL/min, retention time 7.2 min (major) and 10.5 min. HRMS Calculated for C<sub>22</sub>H<sub>29</sub>O<sub>4</sub> [M+H]<sup>+</sup> 357.2060, found: 357.2063.

**(-)-Cyclohexyl 3-allyl-2-cyclohexyl-4-oxochromane-3-carboxylate (8w):** 56 mg, 94% yield, yellow oil, new compound, R<sub>f</sub> = 0.60 (hexanes/ethyl acetate 10/1), 95% ee, [α]<sub>D</sub><sup>20</sup> = -83.74 (*c* 1.12,

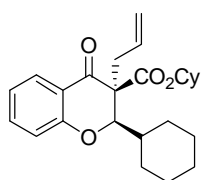

CHCl<sub>3</sub>), <sup>1</sup>H NMR (400 MHz, CDCl<sub>3</sub>) δ 7.95 (dd, *J* = 7.8, 1.7 Hz, 1H), 7.52-7.45 (m, 1H), 7.07-6.97 (m, 2H), 5.71-5.55 (m, 1H), 5.19 (d, *J* = 16.9 Hz, 1H), 5.13-5.06 (m, 1H), 4.90-4.77 (m, 1H), 4.23 (d, *J* = 1.3 Hz, 1H), 3.37-3.24 (m, 1H), 2.72 (dd, *J* = 14.6, 9.7 Hz, 1H), 1.99-1.89 (m, 1H), 1.84-1.67 (m, 4H), 1.66-1.53 (m, 3H), 1.52-1.32 (m, 4H), 1.32-1.15 (m, 8H), 1.12-1.02 (m, 1H). <sup>13</sup>C NMR (100 MHz, CDCl<sub>3</sub>) δ 190.4, 169.1, 162.1, 135.6, 132.7, 127.8, 121.2, 121.1, 119.3, 117.5, 85.1, 73.1, 58.7, 37.9, 34.4, 32.1, 30.6, 30.5, 26.8, 26.3, 26.1, 25.8, 25.2, 22.2, 22.1. HPLC: Chiracel IC column, 254 nm, 30 °C, *n*-Hexane/*i*-PrOH = 99/1, flow = 0.7 mL/min, retention time 9.4 min (major) and 15.0 min. HRMS Calculated for C<sub>25</sub>H<sub>33</sub>O<sub>4</sub> [M+H]<sup>+</sup> 397.2373, found: 397.2376.

## 4. Transformations of the Products

### Reduction of Product (-)-8k with Sodium Borohydride

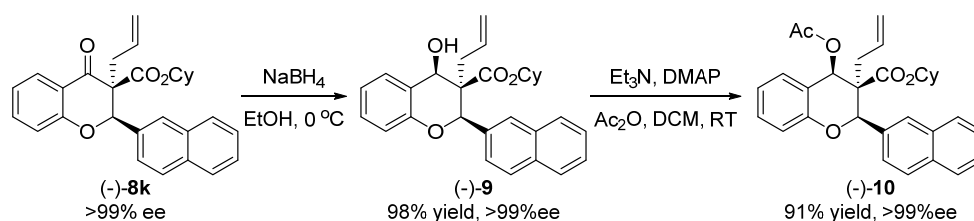

To a solution of flavanone (-)-**8k** (55 mg, 0.125 mmol) in ethanol (5.0 mL) was added sodium borohydride (24 mg, 0.624 mmol) at 0 °C. The reaction mixture was stirred for 32 h. The solution was quenched with saturated ammonium chloride aqueous solution (10 mL). The aqueous layer was extracted with ethyl acetate (10 mL×3), washed with brine, dried over sodium sulfate, and concentrated under reduced pressure. The residue was purified by silica gel column chromatography to afford compound (-)-**9**.

To a solution of (-)-**9** (16 mg, 0.036 mmol) in dichloromethane (5.0 mL) was added triethylamine (23.3 mg, 32.0 μL, 0.230 mmol), 4-dimethylaminopyridine (1.4 mg, 0.011 mmol) and acetic anhydride (11.7 mg, 10.8 μL, 0.115 mmol) at ambient temperature. The reaction mixture was stirred overnight. The solution was quenched with saturated ammonium chloride aqueous solution (10 mL). The aqueous layer was extracted with dichloromethane (10 mL×3), washed with brine, dried over sodium sulfate, and concentrated under reduced pressure. The residue was purified by silica gel column chromatography to afford compound (-)-**10**.

**(-)-(2R,3R,4R)-Cyclohexyl 3-allyl-4-hydroxy-2-(naphthalen-2-yl)chromane-3-carboxylate (9):** 54 mg, 98% yield, colorless oil, new compound,  $R_f = 0.50$  (hexanes/ethyl acetate 10/1), >99% ee,  $[\alpha]_D^{20} = -25.67$  ( $c$  0.74, CHCl<sub>3</sub>), <sup>1</sup>H NMR (400 MHz, CDCl<sub>3</sub>)  $\delta$  7.87-7.78 (m, 4H), 7.57 (d,  $J = 7.6$  Hz, 1H), 7.53-7.45 (m, 3H), 7.21 (t,  $J = 7.7$  Hz, 1H), 7.03 (t,  $J = 7.2$  Hz, 1H), 6.91 (d,  $J = 8.1$  Hz, 1H), 6.13-6.00 (m, 1H), 5.24-5.14 (m, 3H), 5.08 (d,  $J = 9.0$  Hz, 1H), 4.93-4.84 (m, 1H), 2.86 (d,  $J = 9.3$  Hz, 1H), 2.65 (dd,  $J = 14.2, 7.0$  Hz, 1H), 2.33 (dd,  $J = 14.2, 7.6$  Hz, 1H), 1.75-1.64 (m, 2H), 1.53-1.45 (m, 1H), 1.43-1.27 (m, 4H), 1.25-1.08 (m, 3H). <sup>13</sup>C NMR (100 MHz, CDCl<sub>3</sub>)  $\delta$  170.5, 154.4, 134.0, 133.6, 133.4, 132.7, 128.7, 128.1, 127.7, 127.6, 127.6, 127.5, 126.4, 126.2, 125.7, 125.7, 121.6, 119.4, 116.0, 82.3, 73.8, 70.6, 53.4, 39.2, 31.3, 31.3, 25.2, 23.2, 23.1. HPLC: Chiracel IC column, 230 nm, 30 °C, *n*-Hexane/*i*-PrOH = 98/2, flow = 1.0 mL/min, retention time 9.2 min (major) and 28.6 min. HRMS Calculated for C<sub>29</sub>H<sub>30</sub>NaO<sub>4</sub> [M+Na]<sup>+</sup> 465.2036, found: 465.2036.

**(-)-(2R,3S,4R)-Cyclohexyl 4-acetoxy-3-allyl-2-(naphthalen-2-yl)chromane-3-carboxylate (10):** 16 mg, 91% yield, colorless oil, new compound,  $R_f = 0.55$  (hexanes/ethyl acetate 10/1), >99% ee,  $[\alpha]_D^{20} = -61.25$  ( $c$  0.32, CHCl<sub>3</sub>), <sup>1</sup>H NMR (400 MHz, CDCl<sub>3</sub>)  $\delta$  7.89 (s, 1H), 7.87-7.80 (m, 3H), 7.53-7.48 (m, 3H), 7.30-7.25 (m, 1H), 7.23 (d,  $J = 7.5$  Hz, 1H), 7.02-6.96 (m, 2H), 6.42 (s, 1H), 6.00-5.89 (m, 1H), 5.44 (s, 1H), 5.20-5.12 (m, 2H), 5.03-4.95 (m, 1H), 2.58 (dd,  $J = 14.5, 6.2$  Hz, 1H), 2.28 (dd,  $J = 14.5, 8.5$  Hz, 1H), 1.93 (s, 3H), 1.79-1.72 (m, 1H), 1.68-1.61 (m, 1H), 1.51-1.32 (m, 6H), 1.28-1.12 (m, 2H). <sup>13</sup>C NMR (100 MHz, CDCl<sub>3</sub>)  $\delta$  170.8, 169.3, 154.7, 134.2, 133.4, 132.8, 132.1, 129.4, 128.1, 128.0, 127.8, 127.6,

127.6, 126.4, 126.2, 125.4, 121.4, 121.2, 119.6, 116.3, 81.0, 73.1, 69.6, 51.7, 39.0, 31.3, 30.9, 25.3, 22.8, 22.6, 21.1. HPLC: Chiracel IA column, 230 nm, 30 °C, *n*-Hexane/*i*-PrOH = 95/5, flow = 1.0 mL/min, retention time 13.1 min (major). HRMS Calculated for C<sub>31</sub>H<sub>32</sub>NaO<sub>5</sub> [M+Na]<sup>+</sup> 507.2142, found: 507.2144.

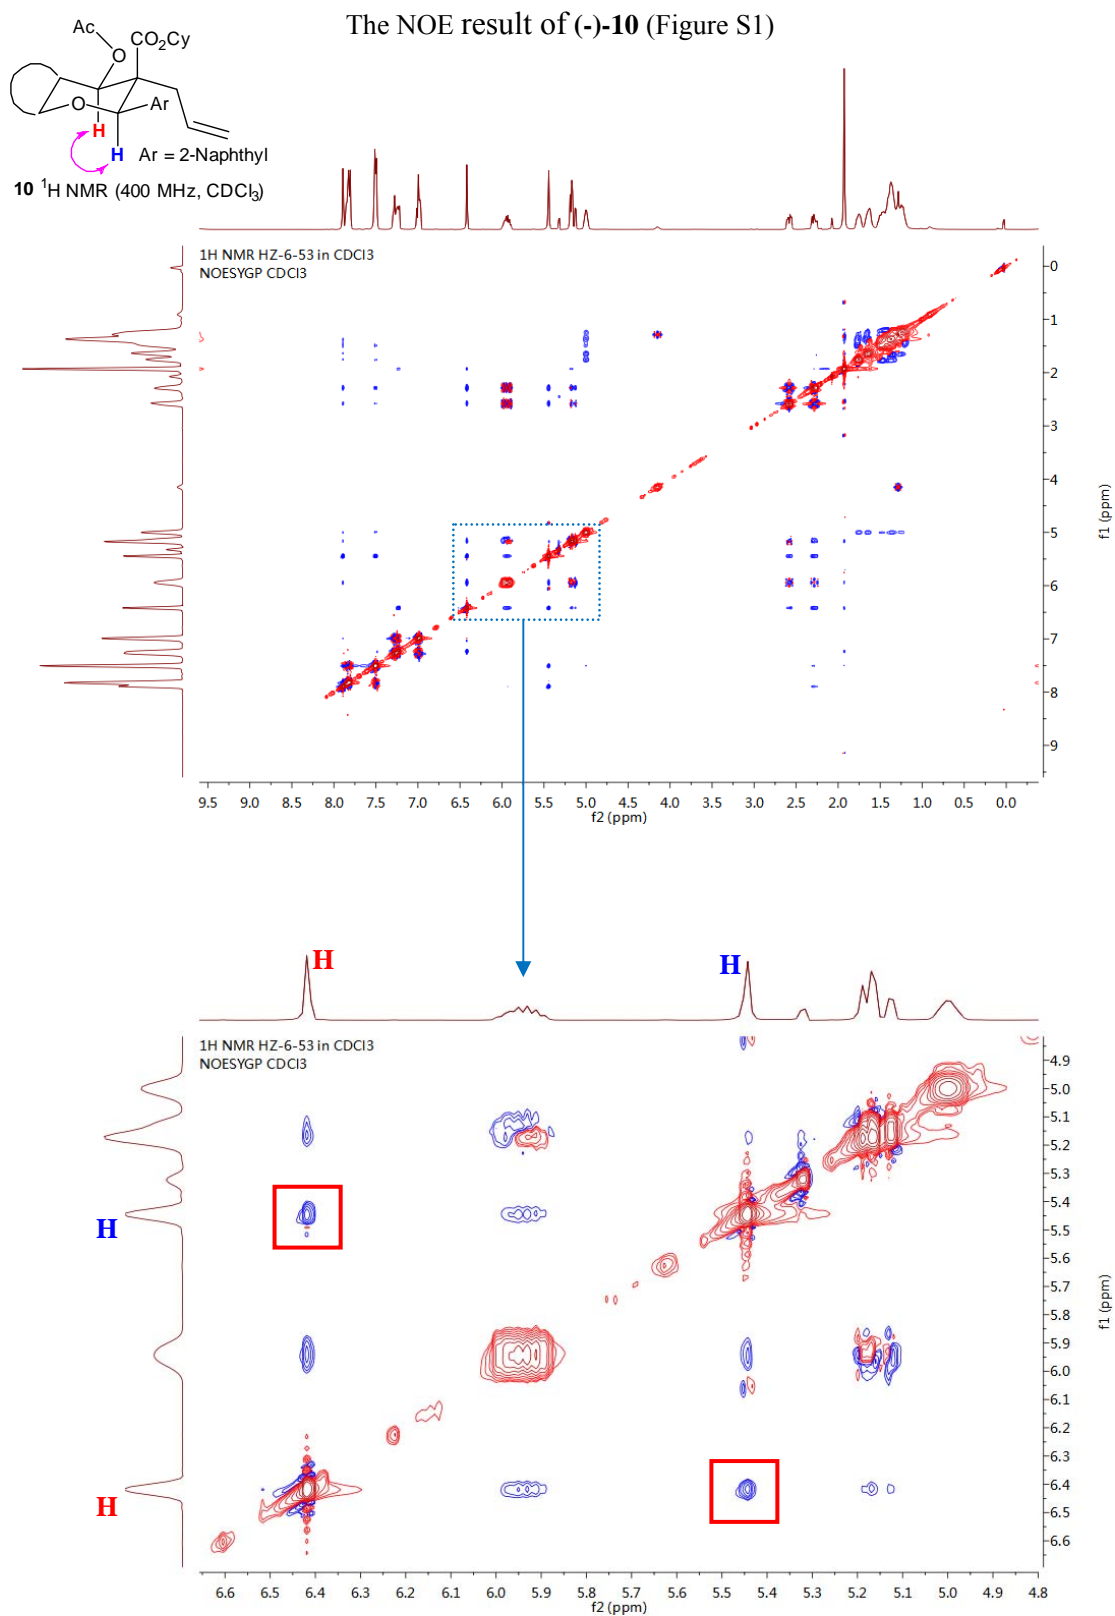

Figure S1. NOE spectrum of (-)-**10**

## Reduction of Product (-)-8k with Lithium Aluminium Tetrahydride

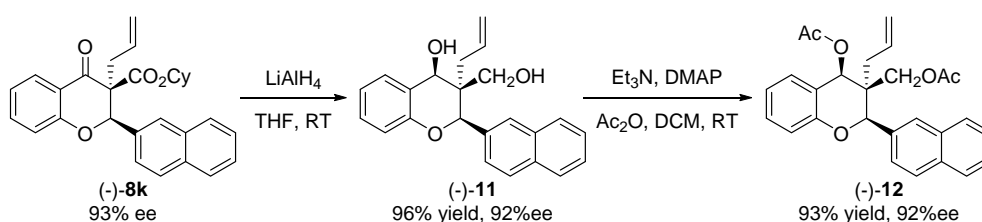

To a solution of (-)-**8k** (90 mg, 0.204 mmol) in tetrahydrofuran (5.0 mL) was added lithium aluminium tetrahydride (23 mg, 0.612 mmol) at ambient temperature. The reaction mixture was stirred for 18.5 h. The solution was quenched with saturated ammonium chloride aqueous solution (10 mL). The aqueous layer was extracted with ethyl acetate (10 mL×3), washed with brine, dried over sodium sulfate, and concentrated under reduced pressure. The residue was purified by silica gel column chromatography to afford compound (-)-**11**.

To a solution of (-)-**11** (30 mg, 0.087 mmol) in dichloromethane (5.0 mL) was added triethylamine (87.6 mg, 0.12 mL, 0.866 mmol), 4-dimethylaminopyridine (5.3 mg, 0.043 mmol) and acetic anhydride (44.2 mg, 40.9 μL, 0.433 mmol) at ambient temperature. The reaction mixture was stirred overnight. The solution was quenched with saturated ammonium chloride aqueous solution (10 mL). The aqueous layer was extracted with dichloromethane (10 mL×3), washed with brine, dried over sodium sulfate, and concentrated under reduced pressure. The residue was purified by silica gel column chromatography to afford compound (-)-**12**.

**(-)-(2R,3R,4S)-3-allyl-3-(hydroxymethyl)-2-(naphthalen-2-yl)chroman-4-ol (11):** 68 mg, 96% yield, colorless oil, new compound,  $R_f = 0.28$  (hexanes/ethyl acetate 10/1), 92% ee,  $[\alpha]_D^{20} = -45.62$  ( $c$  0.48, CHCl<sub>3</sub>), <sup>1</sup>H NMR (400 MHz, CDCl<sub>3</sub>) δ 7.87-7.79 (m, 4H), 7.59 (d,  $J = 7.7$  Hz, 1H), 7.53-7.45 (m, 3H), 7.24-7.18 (m, 1H), 7.04-6.98 (m, 1H), 6.88 (d,  $J = 7.6$  Hz, 1H), 5.98-5.82 (m, 1H), 5.26-5.13 (m, 2H), 5.19 (s, 1H), 5.04 (d,  $J = 8.3$  Hz, 1H), 4.23 (d,  $J = 11.0$  Hz, 1H), 3.83 (d,  $J = 8.8$  Hz, 1H), 3.73 (dd,  $J = 10.9, 2.1$  Hz, 1H), 2.60 (dd,  $J = 14.6, 7.2$  Hz, 1H), 2.36 (brs, 1H), 2.15 (dd,  $J = 14.6, 7.6$  Hz, 1H). <sup>13</sup>C NMR (100 MHz, CDCl<sub>3</sub>) δ 153.4, 134.4, 133.7, 133.3, 132.9, 128.9, 128.2, 127.9, 127.7, 127.7, 127.2, 126.5, 125.5, 125.4, 121.5, 119.7, 115.8, 82.8, 72.3, 63.1, 42.2, 35.9. HPLC: Chiracel IC column, 230 nm, 30 °C, *n*-Hexane/*i*-PrOH = 95/5, flow = 0.8 mL/min, retention time 18.1 min and 26.2 min (major). HRMS Calculated for C<sub>23</sub>H<sub>22</sub>NaO<sub>3</sub> [M+Na]<sup>+</sup> 369.1461, found: 369.1465.

**(-)-((2R,3S,4S)-4-acetoxy-3-allyl-2-(naphthalen-2-yl)chroman-3-yl)methyl acetate (12):** 35 mg, 93% yield, colorless oil, new compound,  $R_f = 0.45$  (hexanes/ethyl acetate 10/1), 92% ee,  $[\alpha]_D^{20} = -7.57$  ( $c$  0.70, CHCl<sub>3</sub>), <sup>1</sup>H NMR (400 MHz, CDCl<sub>3</sub>) δ 7.87-7.78 (m, 4H), 7.54-7.46 (m, 3H), 7.35-7.30 (m, 1H), 7.28-7.23 (m, 1H), 7.05-6.97 (m, 2H), 6.20 (s, 1H), 5.99-5.86 (m, 1H), 5.41 (s, 1H), 5.27-5.13 (m, 2H), 4.32 (d,  $J = 11.6$  Hz, 1H), 4.14 (d,  $J = 11.6$  Hz, 1H), 2.38-2.26 (m, 2H), 1.89 (s, 3H), 1.86 (s, 3H). <sup>13</sup>C NMR (100 MHz, CDCl<sub>3</sub>) δ 170.6, 170.6, 154.2, 134.9, 133.1, 132.6, 131.9, 130.1, 129.2, 128.1, 127.6, 127.3, 127.1, 126.3, 126.2, 125.8, 121.2, 120.1, 119.9, 116.4, 80.7, 69.4, 62.1, 42.4, 37.2, 20.9, 20.7. HPLC: Chiracel IA column, 230 nm, 30 °C, *n*-Hexane/*i*-PrOH = 95/5, flow = 1.0 mL/min, retention time 14.2 min (major) and 20.0 min. HRMS Calculated for C<sub>27</sub>H<sub>26</sub>NaO<sub>5</sub> [M+Na]<sup>+</sup> 453.1672, found: 453.1673.

The NOE result of (-)-12 (Figure S2)

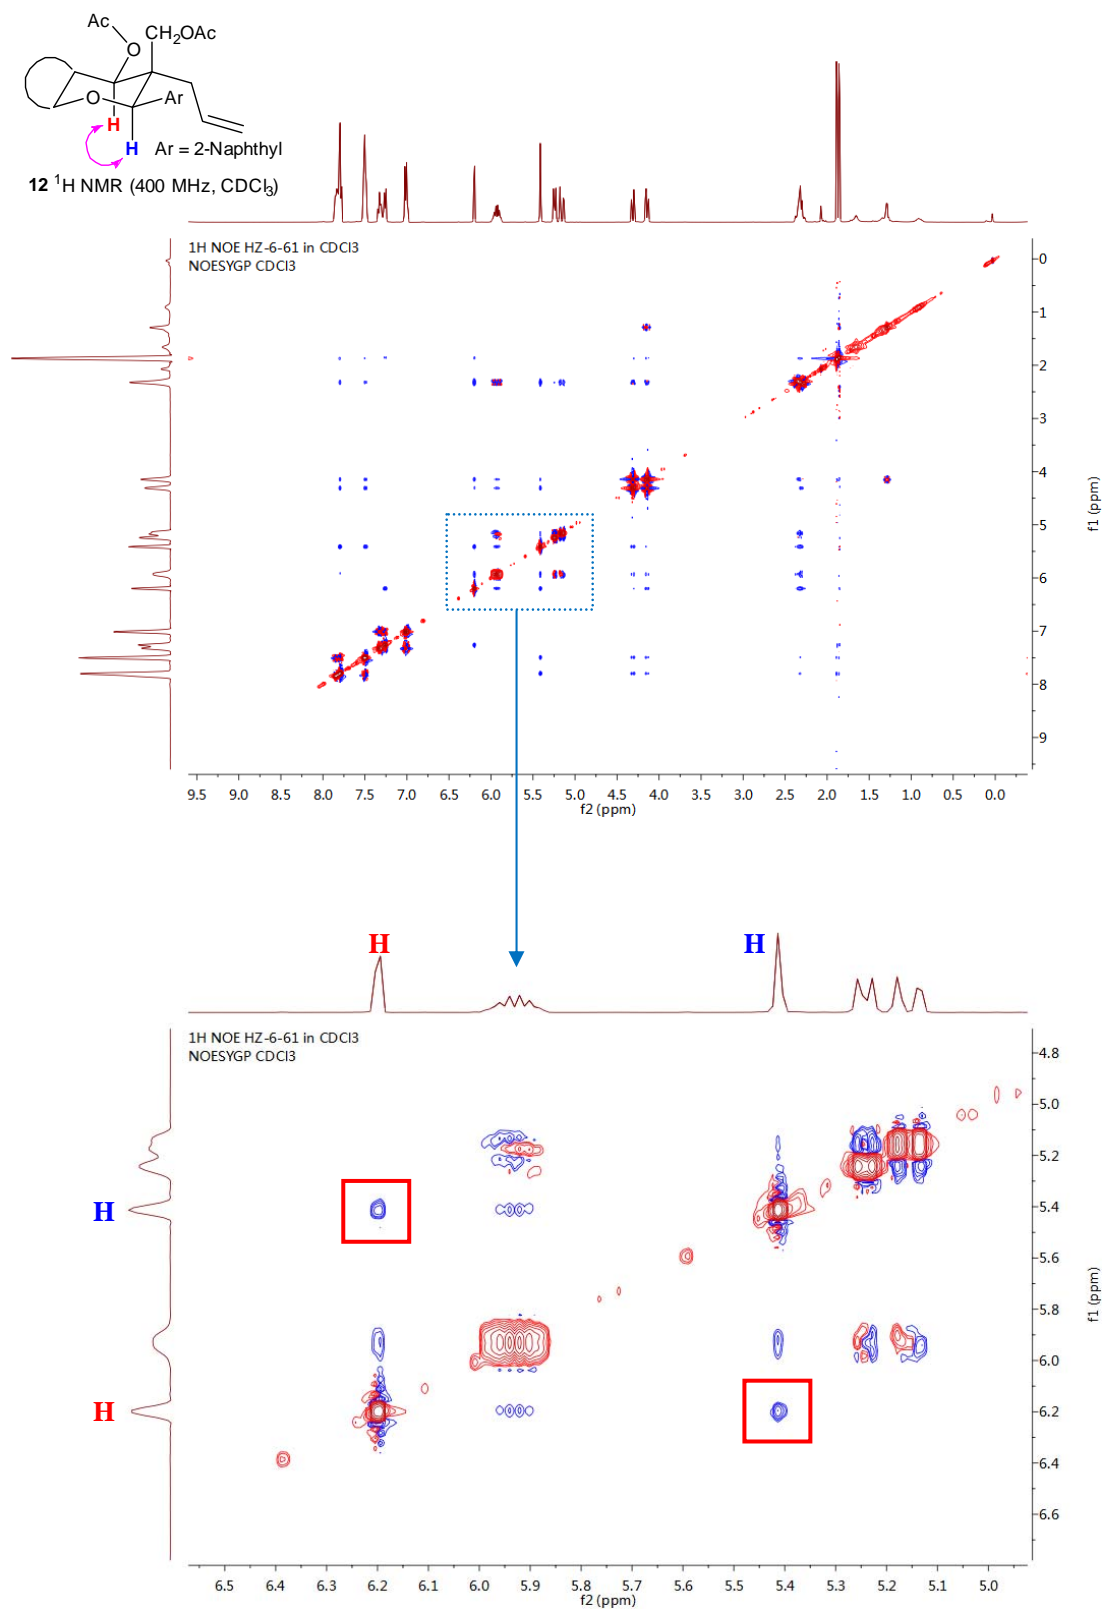

Figure S2. NOE spectrum of (-)-12

## 5. Mechanistic Investigation

### 5.1 Biomimetic Asymmetric Reduction of Flavonoid with D<sub>2</sub>

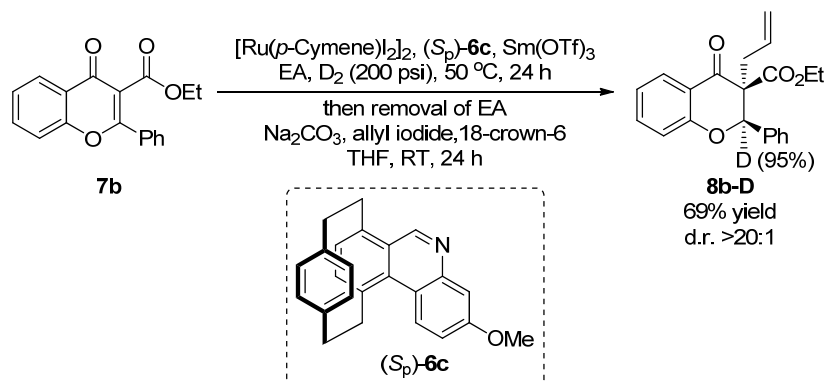

A mixture of  $[\text{Ru}(p\text{-cymene})\text{I}_2]_2$  (0.5 mg, 0.0005 mmol), samarium(III) trifluoromethanesulfonate (12.0 mg, 0.02 mmol), **(S<sub>p</sub>)-6c** (3.4 mg, 0.01 mmol) and **7b** (0.10 mmol) in ethyl acetate (2.0 mL) was stirred at room temperature for 5 min in glove box and then the mixture was transferred to an autoclave. The hydrogenation was performed at 50 °C under D<sub>2</sub> (200 psi) for 24 h. After carefully release of the hydrogen, the autoclave was opened and the reaction mixture was concentrated in *vacuo*. Then, sodium carbonate (21.2 mg, 0.20 mmol), allyl iodide (33.6 mg, 18.3 μL, 0.20 mmol), 18-crown-6 (4.0 mg, 3.4 μL, 0.015 mmol) and tetrahydrofuran (2.0 mL) were added to the mixture above. The new mixture was stirred at ambient temperature for 24 h. The final reaction mixture was concentrated in *vacuo* and then purified by column chromatography on silica gel using hexanes and ethyl acetate to give **8b-D** with 69% yield (**Figure S3-S4**). The result indicated that substrate **7b** could be reduced under D<sub>2</sub> atmosphere, affording the deuterium product **8b-D**, and D<sub>2</sub> was the terminal reductant in the reaction.

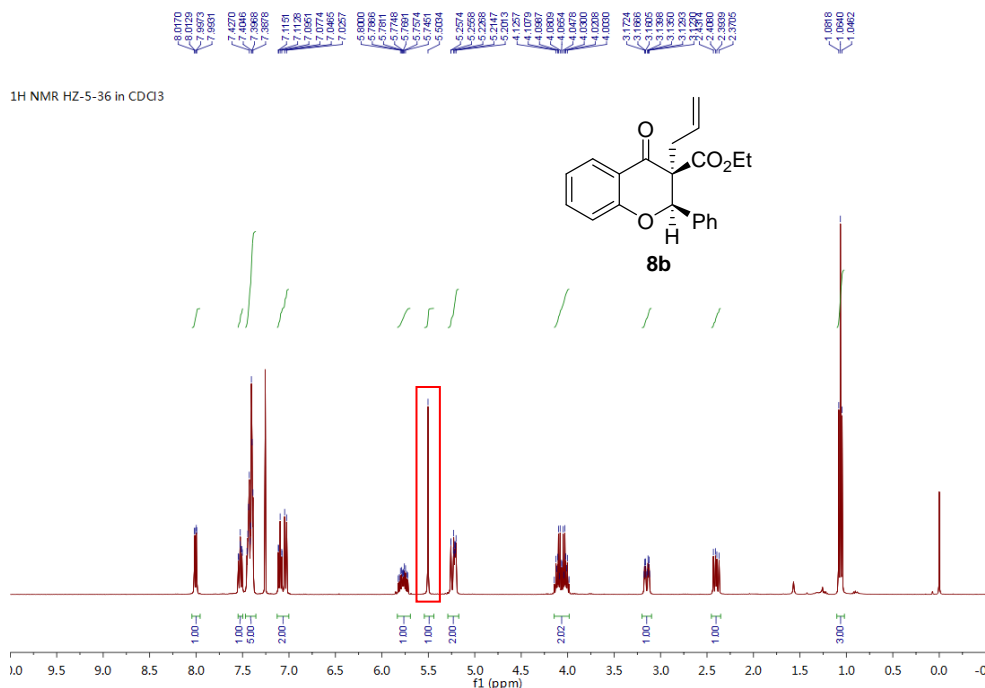

**Figure S3**

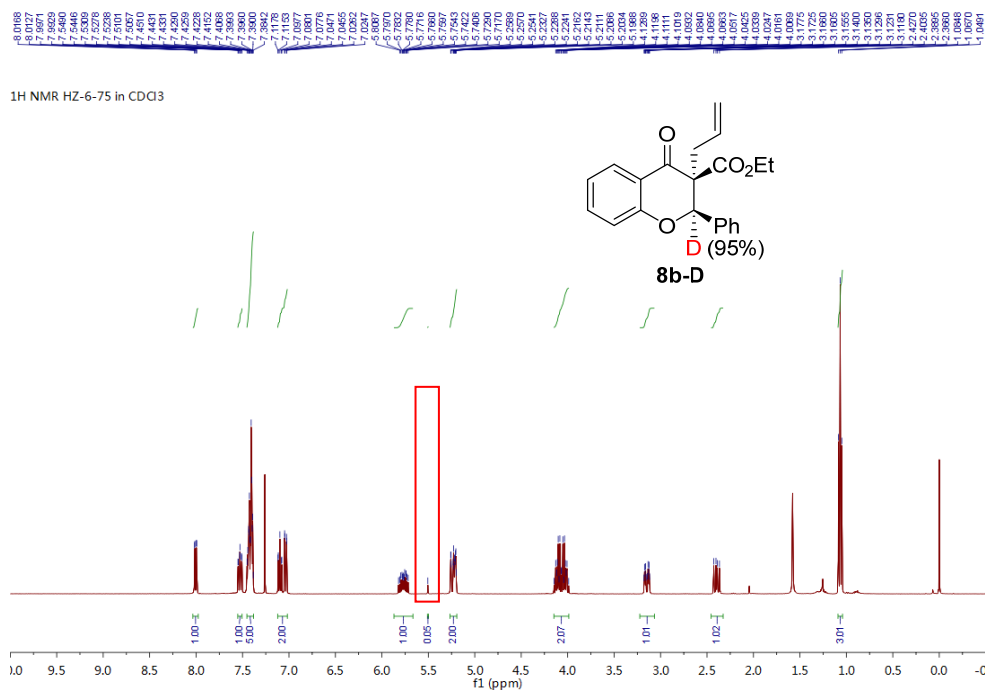

Figure S4

## 5.2 The Reduction of NAD(P)H Model (*S<sub>p</sub>*)-**6c** with D<sub>2</sub>

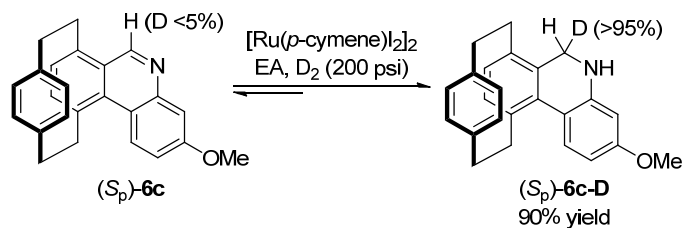

A mixture of  $[\text{Ru}(p\text{-cymene})\text{I}_2]_2$  (4.9 mg, 0.005 mmol), (*S<sub>p</sub>*)-**6c** (33.9 mg, 0.10 mmol) in ethyl acetate (2 mL) was stirred at room temperature for 5 min in glove box and then the mixture was transferred to an autoclave. The hydrogenation was performed at 50 °C under D<sub>2</sub> (200 psi) for 24 h. After careful release of the gas, the autoclave was opened, and it gave the (*S<sub>p</sub>*)-**6c-D** with 90% yield. The result showed that the chiral regenerable NAD(P)H model (*S<sub>p</sub>*)-**6c** could be regenerated in the presence of D<sub>2</sub>, and deuterium atom was added to the less steric face. No deuterium atom incorporation was observed in the recovered NAD(P)H model (*S<sub>p</sub>*)-**6c** (Figure S5-S8).

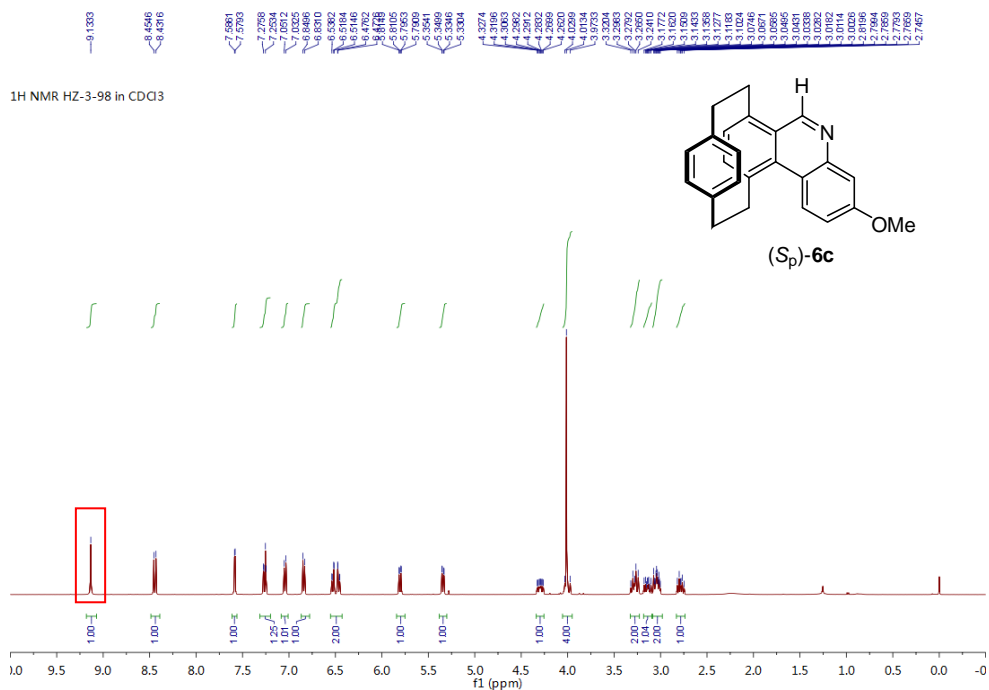

Figure S5

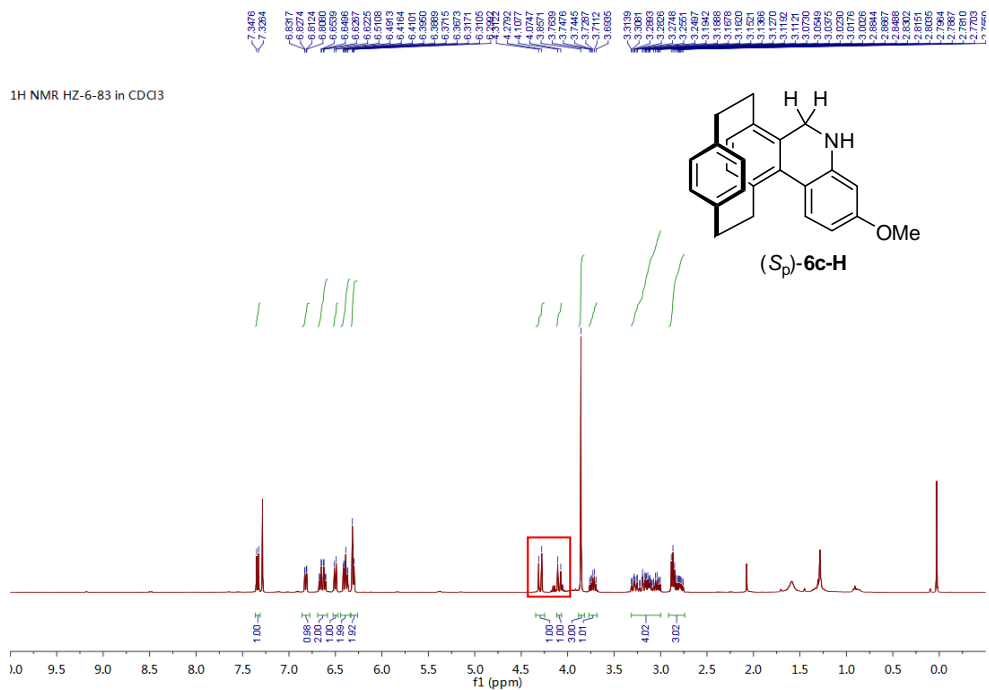

Figure S6-a



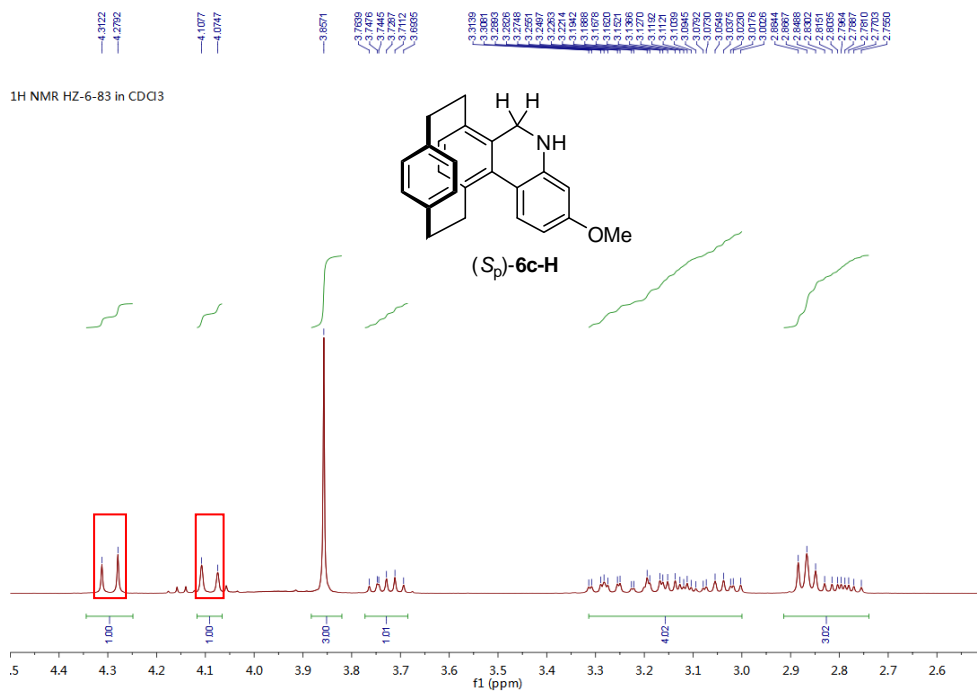

Figure S6-b

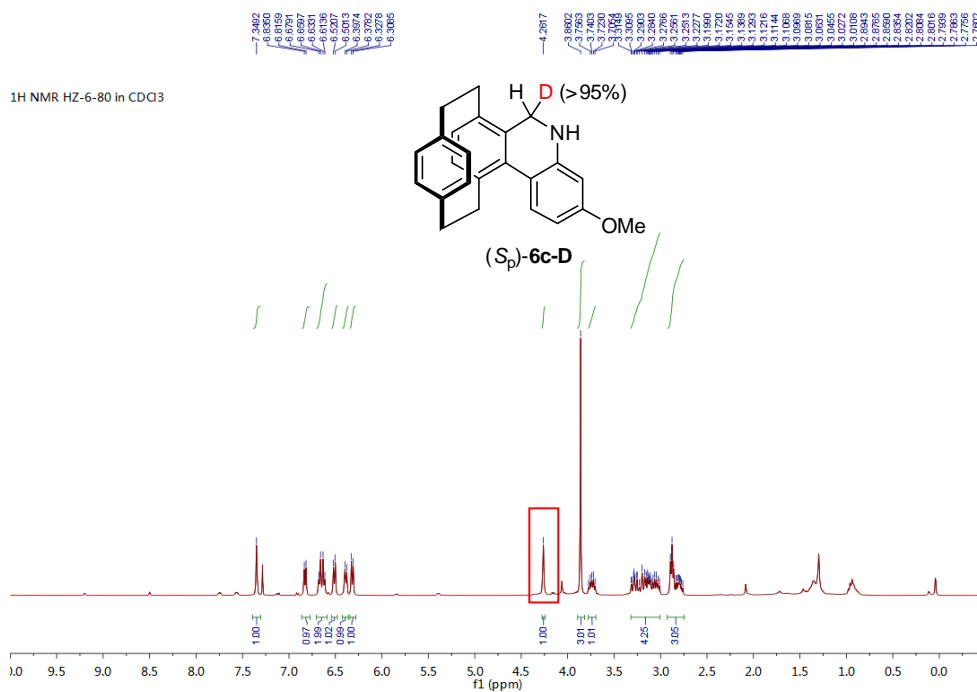

Figure S7

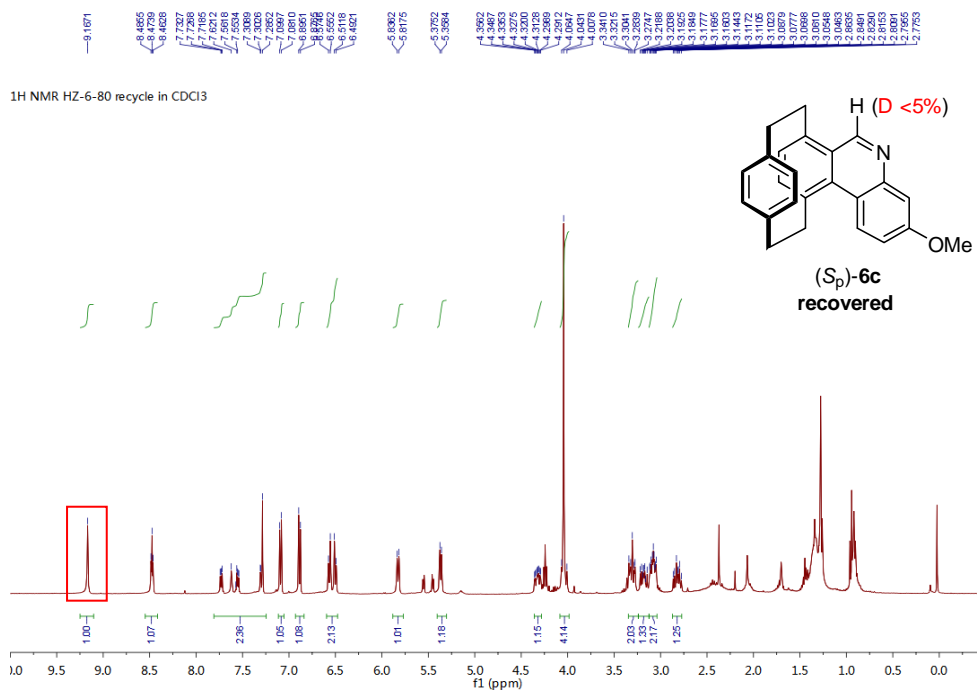

Figure S8

### 5.3 Biomimetic Asymmetric Reduction of Flavonoids with (S<sub>p</sub>)-6c-D

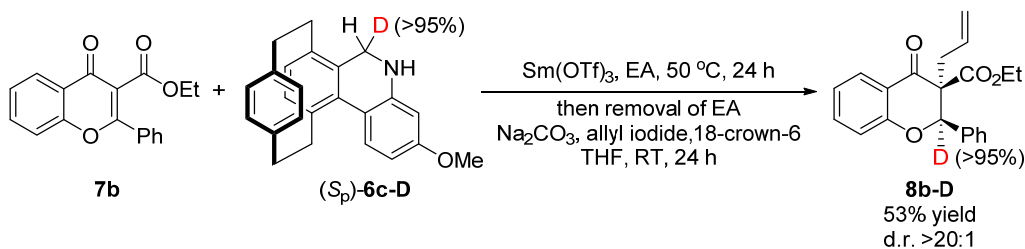

In a 10 mL sealed tube, a mixture of (S<sub>p</sub>)-6c-D (31.1 mg, 0.091 mmol), samarium(III) trifluoromethanesulfonate (10.9 mg, 0.018 mmol), and flavonoid **7b** (26.6, 0.091 mmol) in ethyl acetate (2.0 mL) was stirred at 50 °C for 24 h. Then the reaction mixture was concentrated in *vacuo*. Sodium carbonate (19.3 mg, 0.182 mmol), allyl iodide (30.6 mg, 16.6 μL, 0.182 mmol), 18-crown-6 (3.7 mg, 3.2 μL, 0.014 mmol) and tetrahydrofuran (2.0 mL) were added to the mixture above. The new mixture was stirred at ambient temperature for 24 h. The final reaction mixture was concentrated in *vacuo* and then purified by column chromatography on silica gel using hexanes and ethyl acetate to give **8b-D** with 53% yield. The product was determined by NMR spectra (Figure S9). The result showed that the deuterium chiral NAD(P)H model (S<sub>p</sub>)-6c-D could transfer deuterium to the flavonoid **7b** in the presence of Lewis acid and deuterium atom on the less steric face was selectively transferred, leading to the good enantioselectivity.

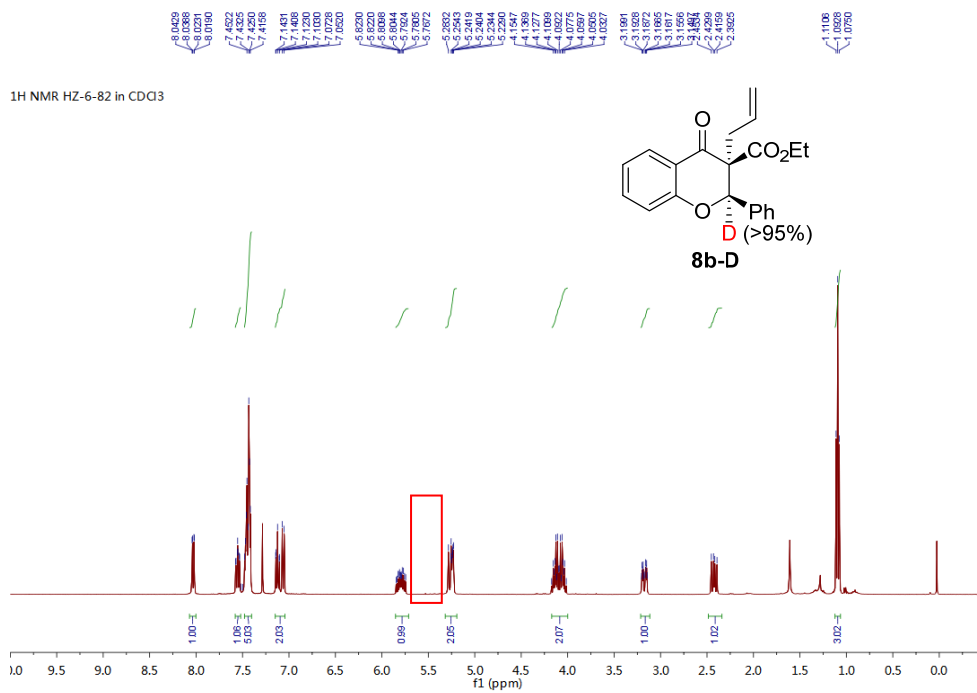

Figure S9

## 6. Determination of the Absolute Configuration

To determine the absolute configuration of (-)-cyclohexyl 3-allyl-2-(naphthalen-2-yl)-4-oxochromane-3-carboxylate (-)-**8k** (97% ee): firstly, (-)-**8k** was upgraded to >99% ee by recrystallization with *n*-hexane/dichloromethane and completely dissolved in dichloromethane (2 mL). Then part of dichloromethane was evaporated and *n*-hexane (2 mL) was added slowly at ambient temperature. The solvent was slowly evaporated and the single crystal of was obtained after one day. The structure in **Figure S10** showed the absolute configuration of (-)-**8k** is (2*R*,3*S*). The CCDC number is 1918727. These details can be obtained free of charge via [www.ccdc.com.ac.uk/data\\_request/cif](http://www.ccdc.com.ac.uk/data_request/cif) from the Cambridge Crystallographic Data Centre.

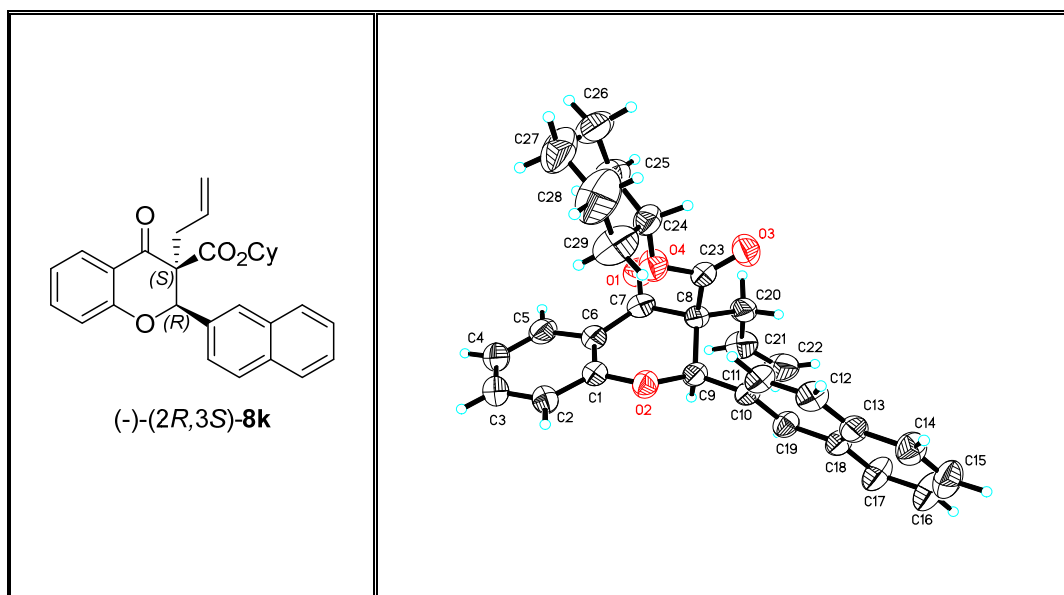

**Figure S10.** X-ray crystallographic analysis of (-)-(2*R*,3*S*)-**8k**

## 7. References

- 1) Kramer, J. J. P.; Yildiz, C.; Nieger, M.; Bräse, S. Direct Access to 4,5-Disubstituted [2.2]Paracyclophanes by Selective *ortho*-Halogenation with Palladium-Catalyzed C–H Activation. *Eur. J. Org. Chem.* **2014**, *2014*, 1287-1295.
- 2) Zhou, F.; Driver, T. G. Efficient Synthesis of 3*H*-Indoles Enabled by the Lead-Mediated  $\alpha$ -Arylation of  $\beta$ -Ketoesters or  $\gamma$ -Lactams Using Aryl Azides. *Org. Lett.* **2014**, *16*, 2916-2919.
- 3) Lin, J.-P.; Long, Y.-Q. Transition Metal-Free One-Pot Synthesis of 2-Substituted 3-Carboxy-4-Quinolone and Chromone Derivatives. *Chem. Commun.* **2013**, *49*, 5313-5315.
- 4) Lv, X.-J.; Chen, Y.-H.; Liu, Y.-K. Two Competitive but Switchable Organocatalytic Cascade Reaction Pathways: The Diversified Synthesis of Chiral Acetal-Containing Bridged Cyclic Compounds. *Org. Lett.* **2019**, *21*, 190-195.
- 5) Ko, T. Y.; Youn, S. W. Cooperative Indium(III)/Silver(I) System for Oxidative Coupling/Annulation of 1,3-Dicarbonyls and Styrenes: Construction of Five-Membered Heterocycles. *Adv. Synth. Catal.* **2016**, *358*, 1934-1941.
- 6) Suljić, S.; Mortzfeld, F. B.; Gunne, M.; Urlacher, V. B.; Pietruszka, J. Enhanced Biocatalytic Performance of Bacterial Laccase from *Streptomyces sviveus*: Application in the Michael Addition Sequence Towards 3-Arylated 4-Oxochromanes. *ChemCatChem* **2015**, *7*, 1380-1385.
- 7) Zanwar, M. R.; Raihan, M. J.; Gawande, S. D.; Kavala, V.; Janreddy, D.; Kuo, C.-W.; Ambre, R.; Yao, C.-F. Alcohol Mediated Synthesis of 4-Oxo-2-aryl-4*H*-chromene-3-carboxylate Derivatives from 4-Hydroxycoumarins. *J. Org. Chem.* **2012**, *77*, 6495-6504.
- 8) Yoshida, M.; Saito, K.; Fujino, Y.; Doi, T. A Concise Total Synthesis of Biologically Active Frutinones via Tributylphosphine-Catalyzed Tandem Acyl Transfer Cyclization. *Tetrahedron* **2014**, *70*, 3452-3458.

## 8. Copy of NMR and HPLC Spectra

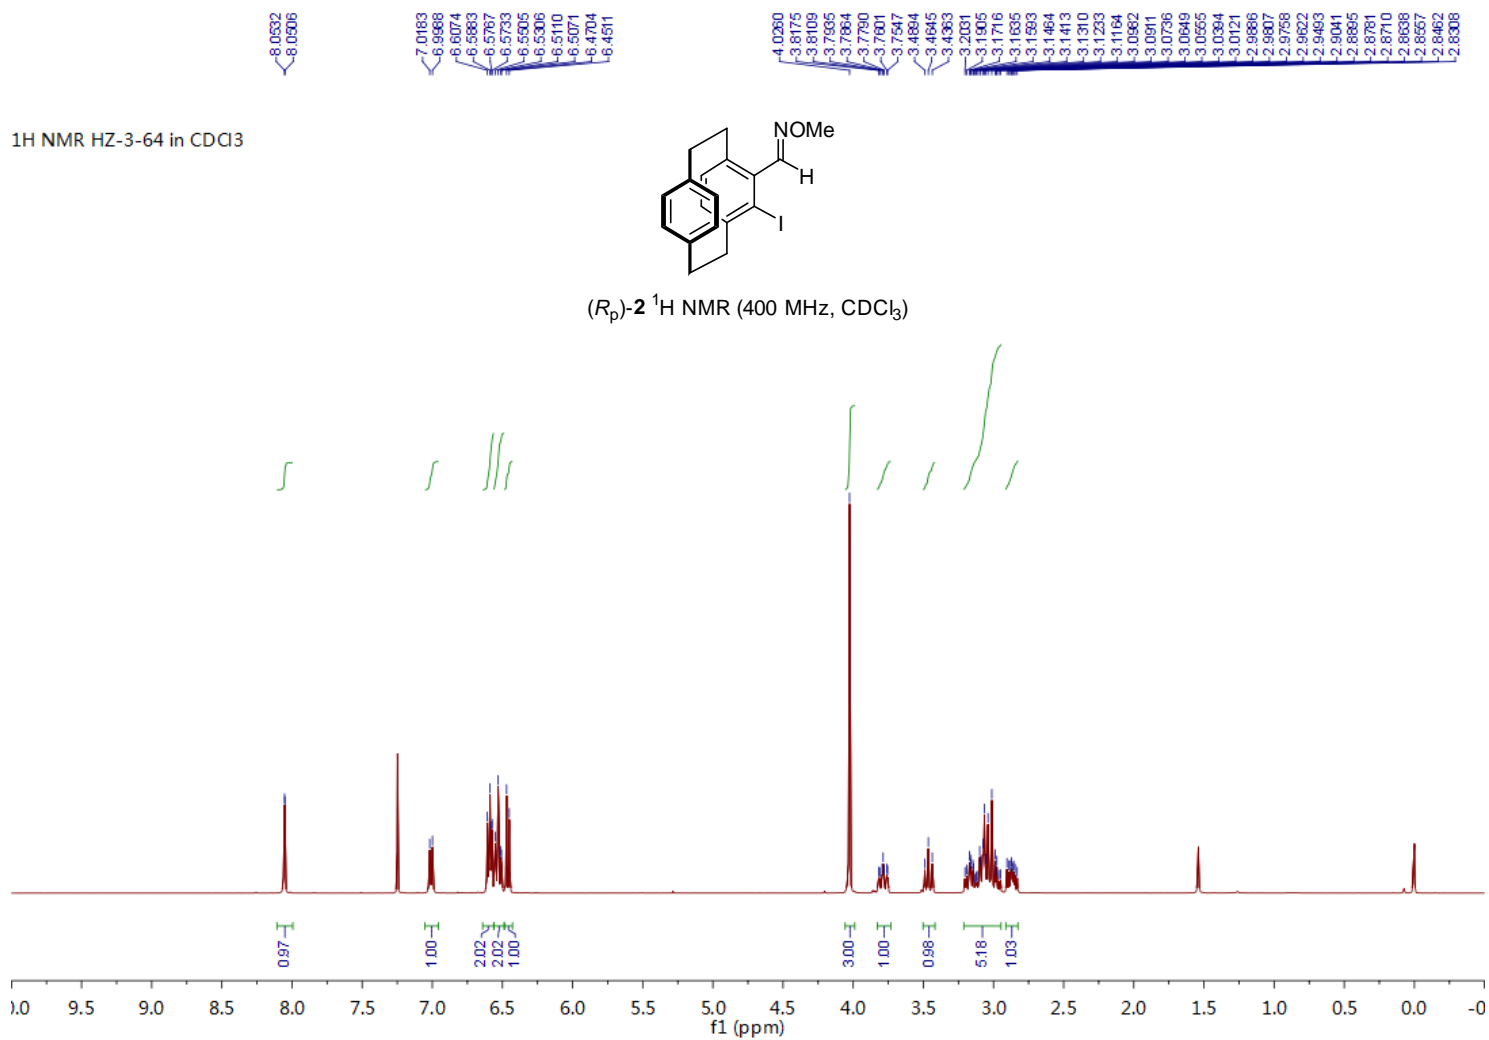

<sup>13</sup>C NMR HZ-3-64 in CDCl<sub>3</sub>

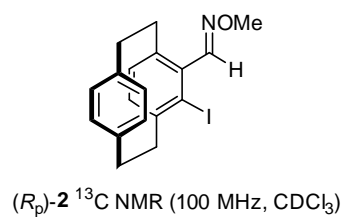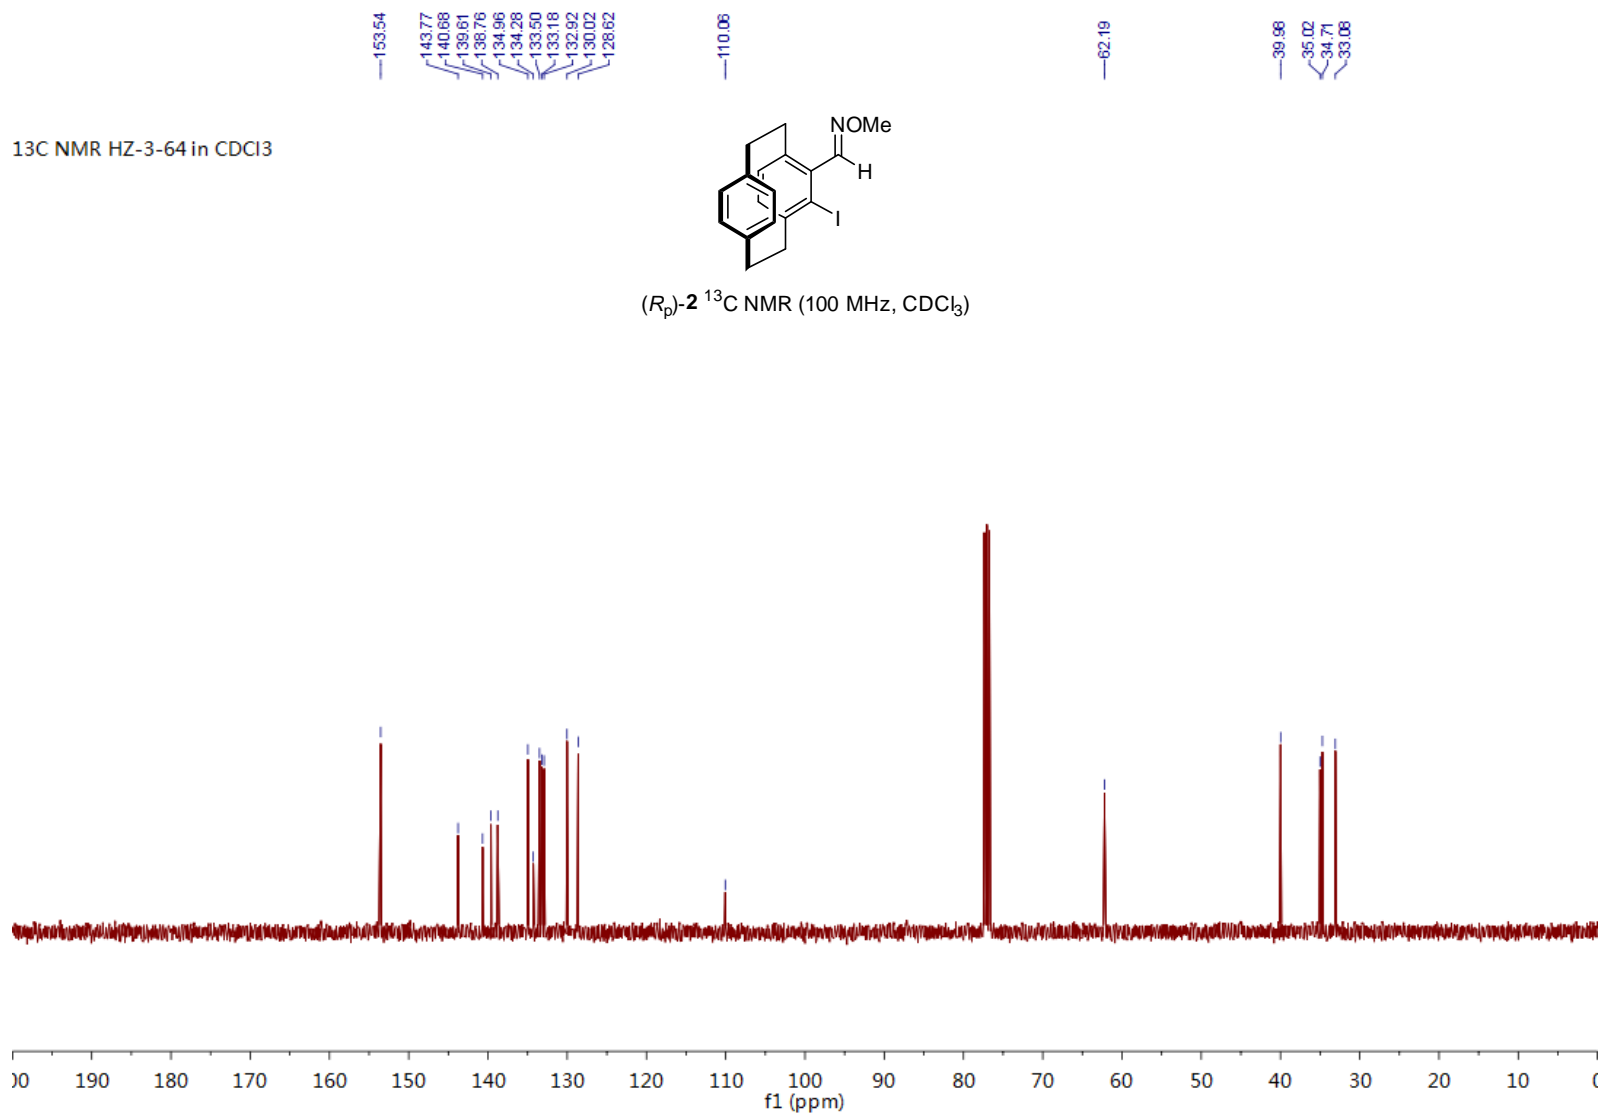

<sup>1</sup>H NMR HZ-3-65 in CDCl<sub>3</sub>

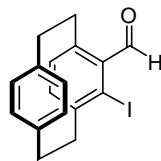

(*R*<sub>p</sub>)-**3** <sup>1</sup>H NMR (400 MHz, CDCl<sub>3</sub>)

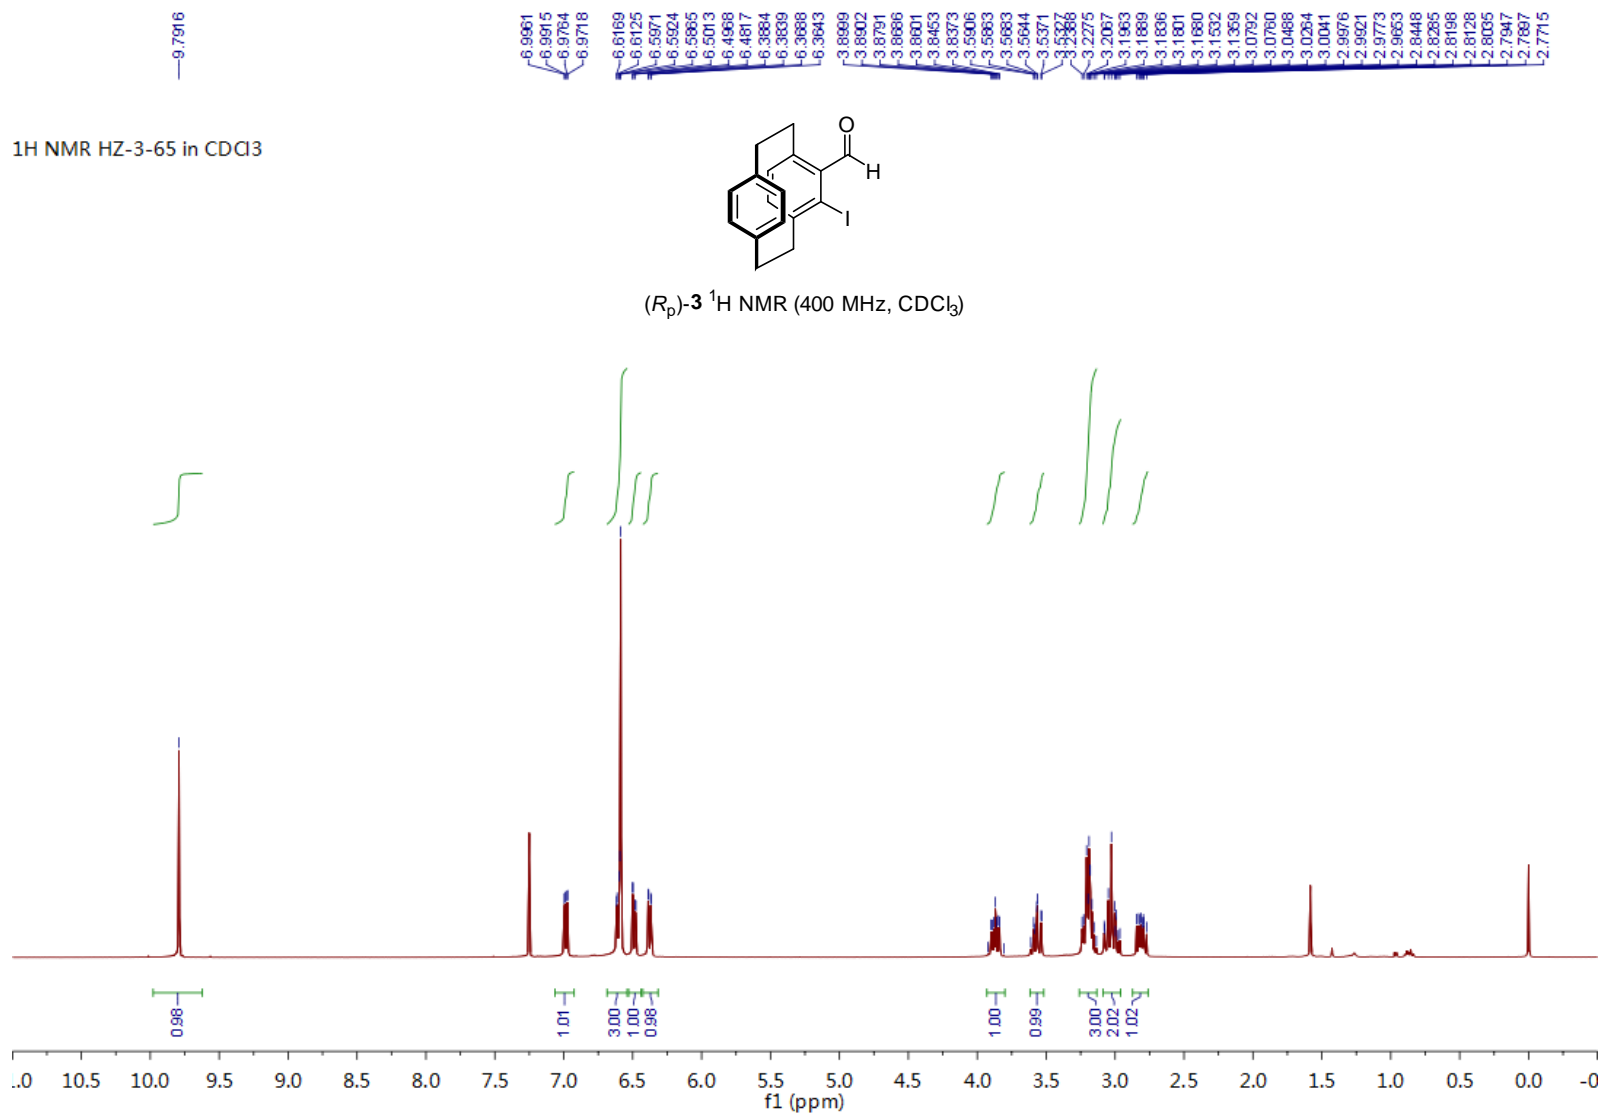



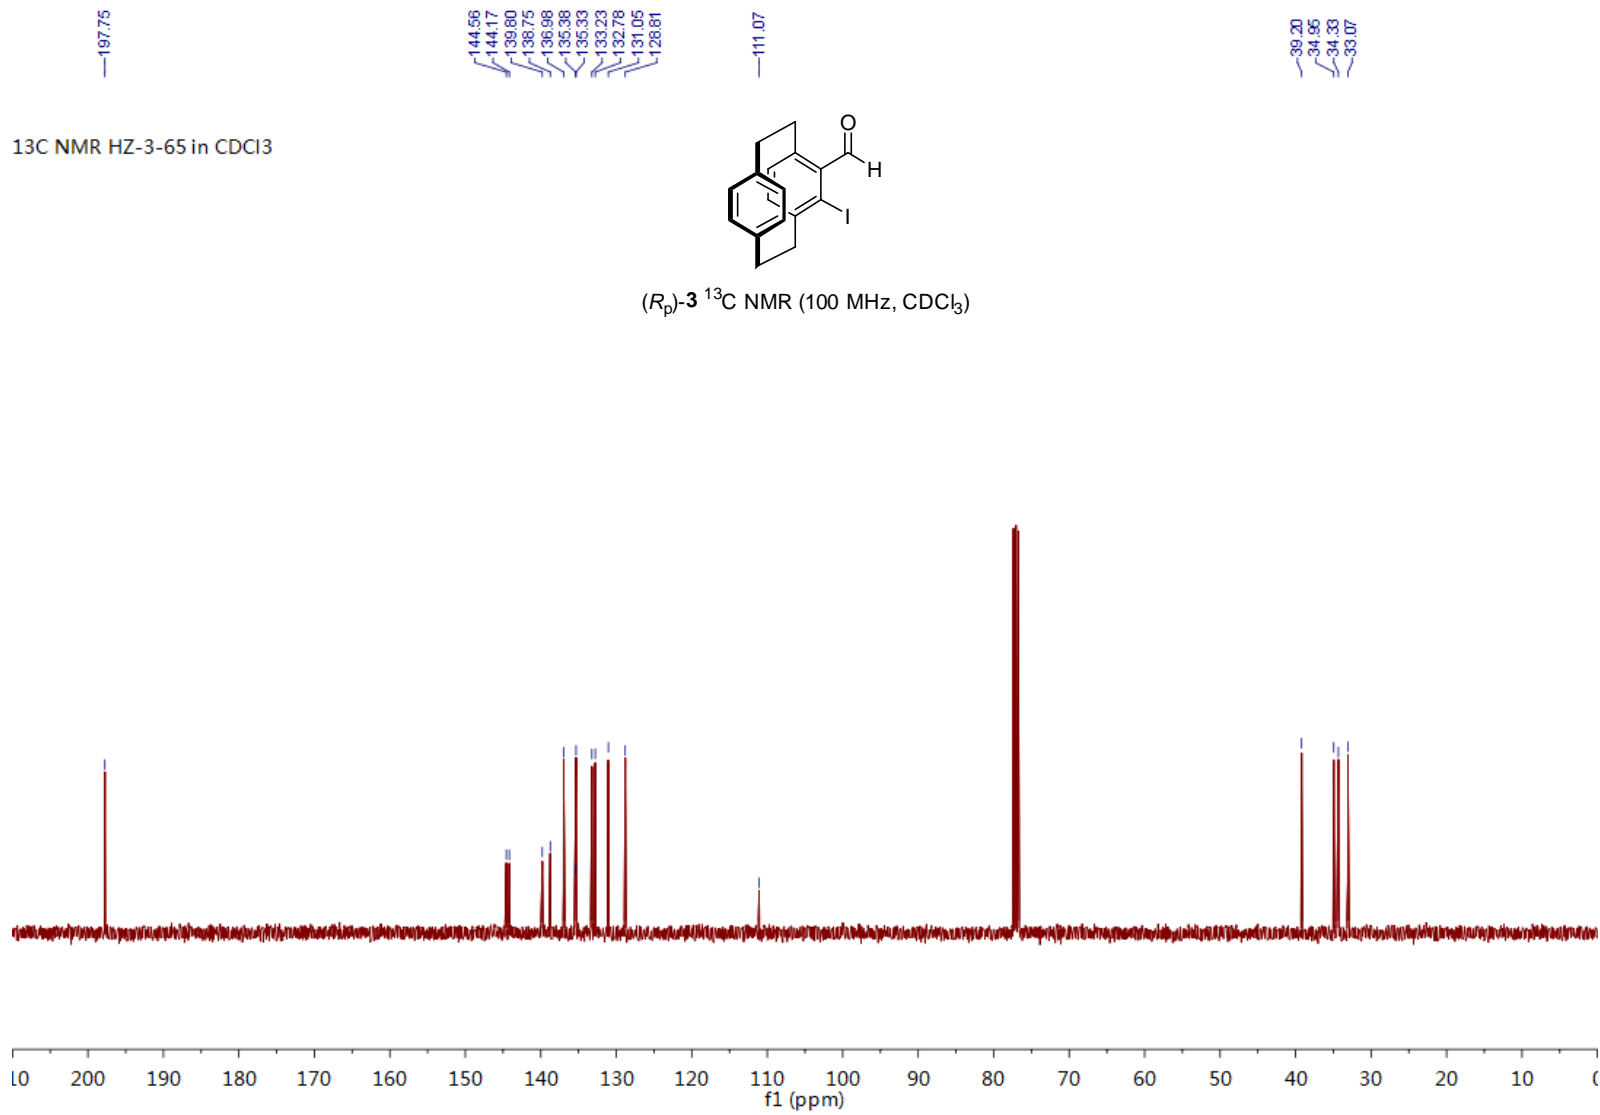

<sup>1</sup>H NMR HZ-3-71 in CDCl<sub>3</sub>

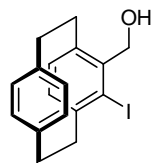

(*R<sub>p</sub>*)-4 <sup>1</sup>H NMR (400 MHz, CDCl<sub>3</sub>)

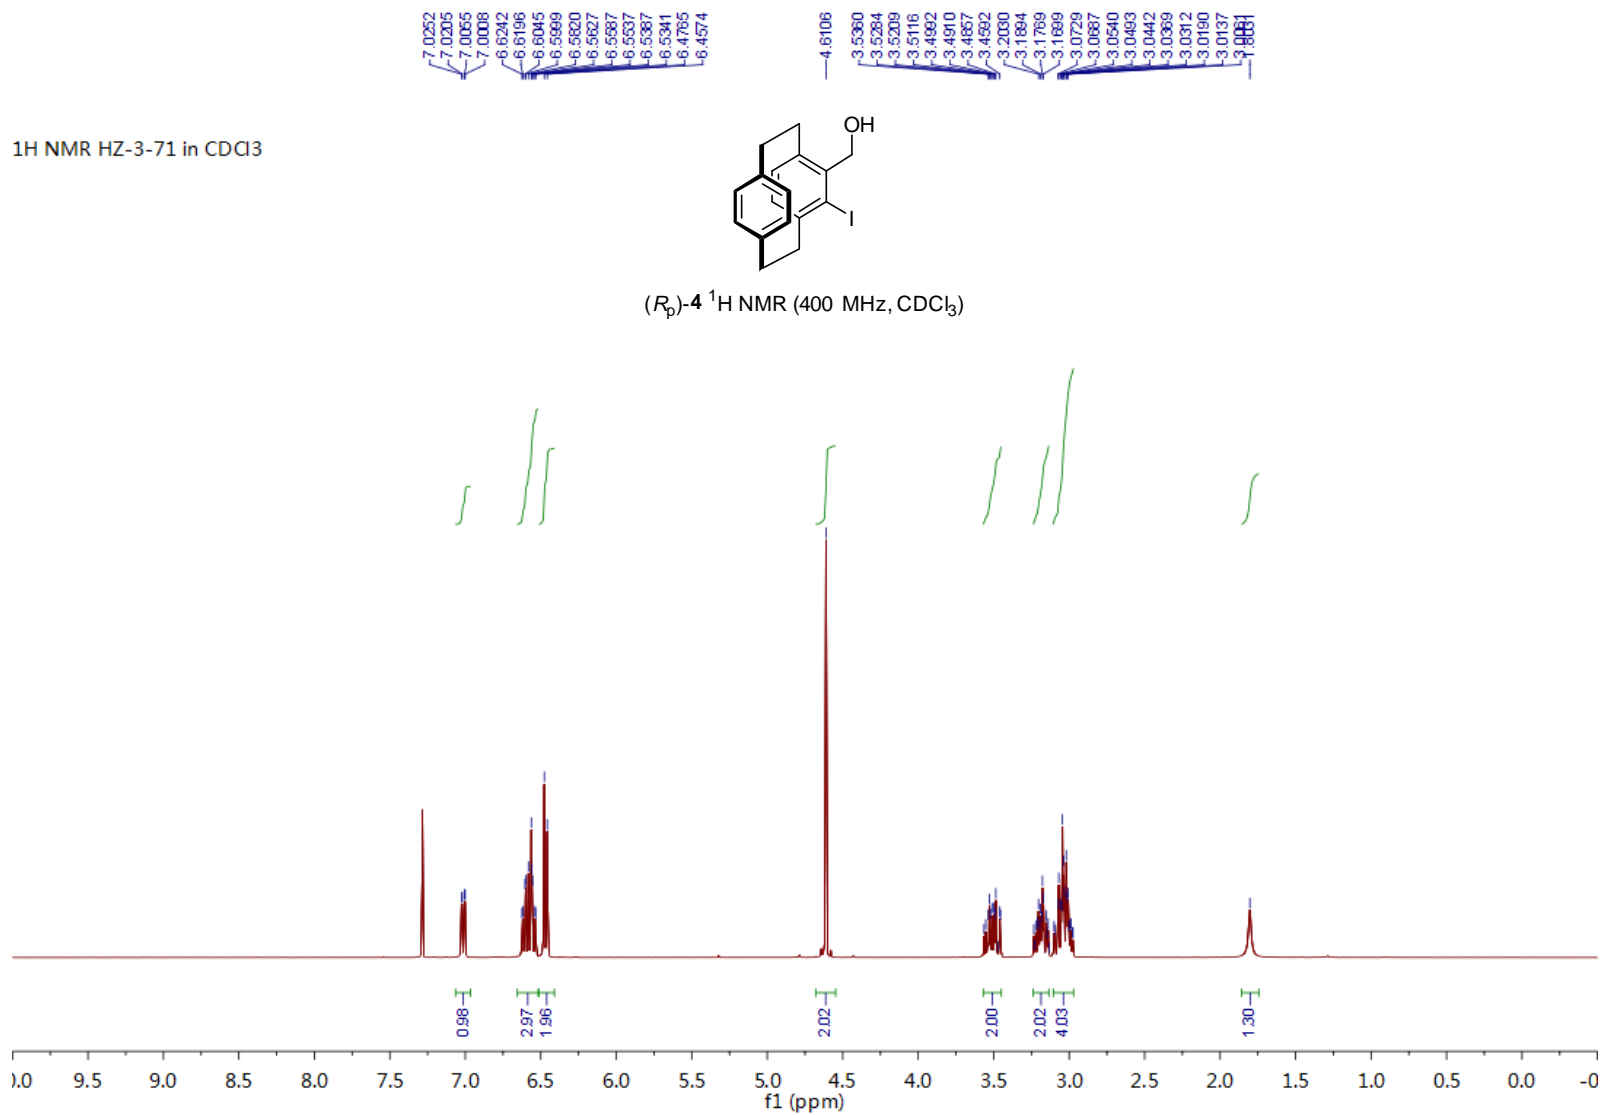

$^{13}\text{C}$  NMR HZ-3-71 in  $\text{CDCl}_3$

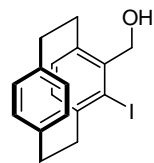

(*R\_p*)-4  $^{13}\text{C}$  NMR (100 MHz,  $\text{CDCl}_3$ )

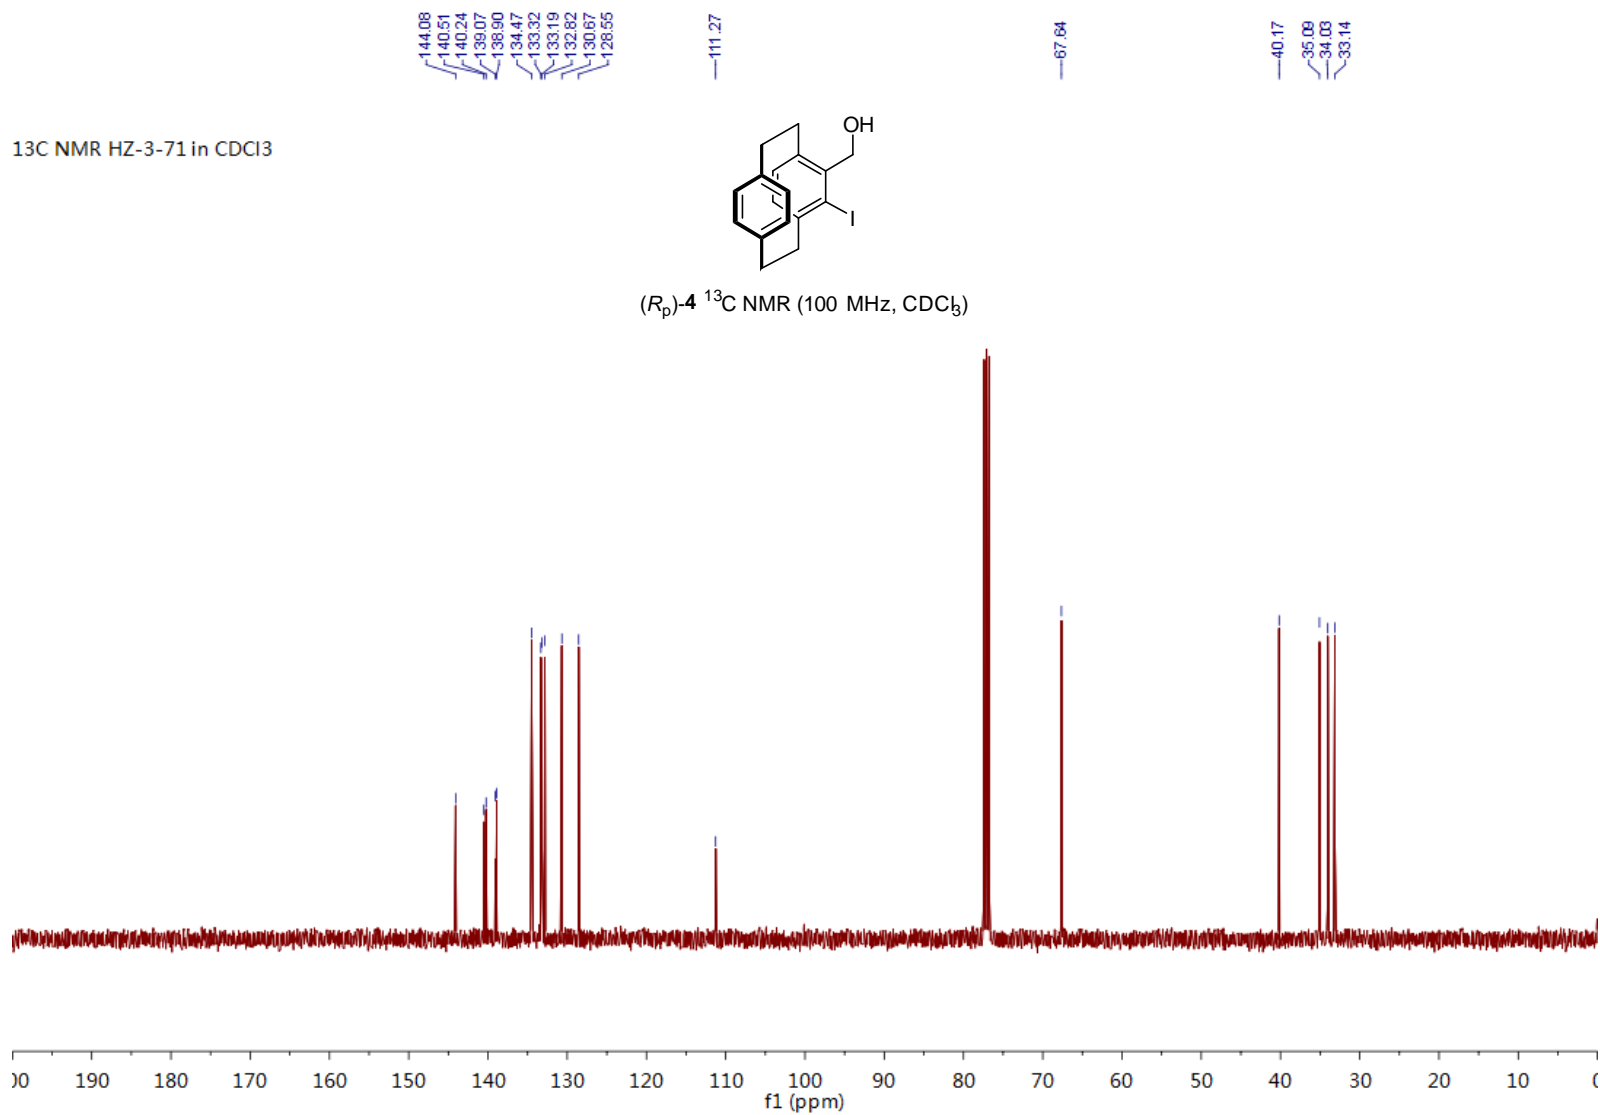

<sup>1</sup>H NMR HZ-3-85 in CDCl<sub>3</sub>

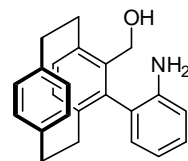

(S<sub>p</sub>)-5a <sup>1</sup>H NMR (400 MHz, CDCl<sub>3</sub>)

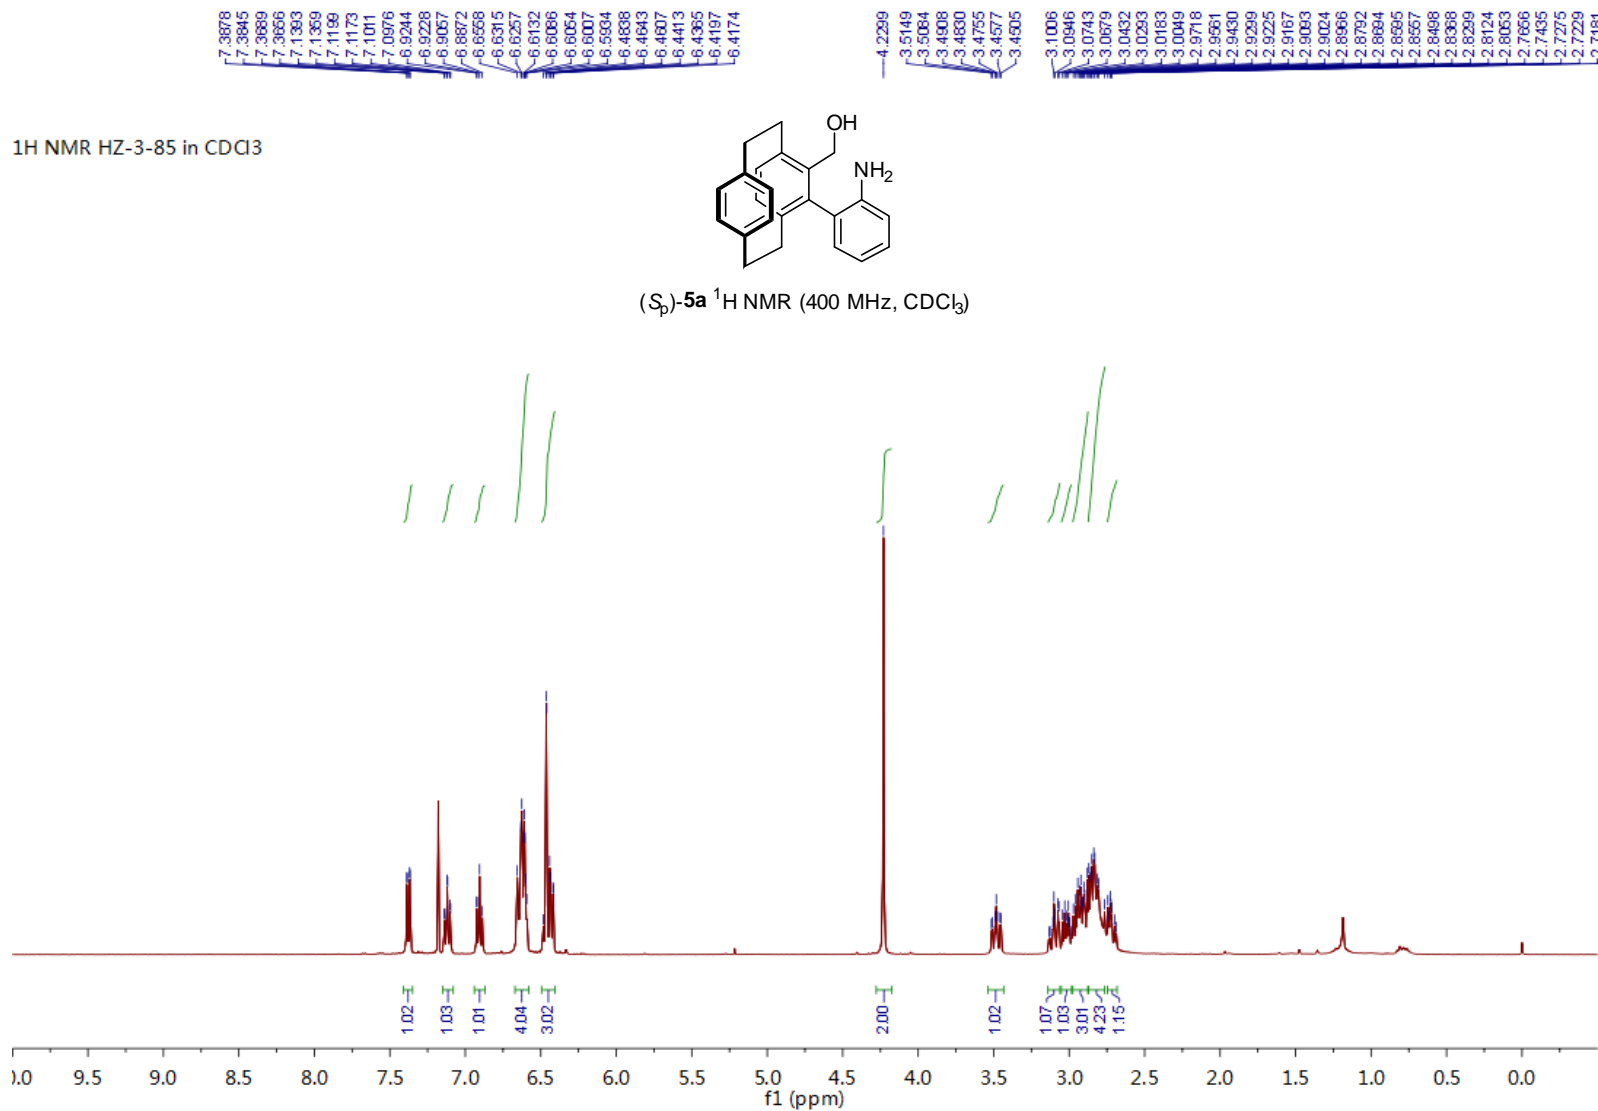

<sup>13</sup>C NMR HZ-3-85 in CDCl<sub>3</sub>

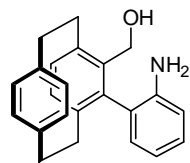

(S<sub>p</sub>)-**5a** <sup>13</sup>C NMR (100 MHz, CDCl<sub>3</sub>)

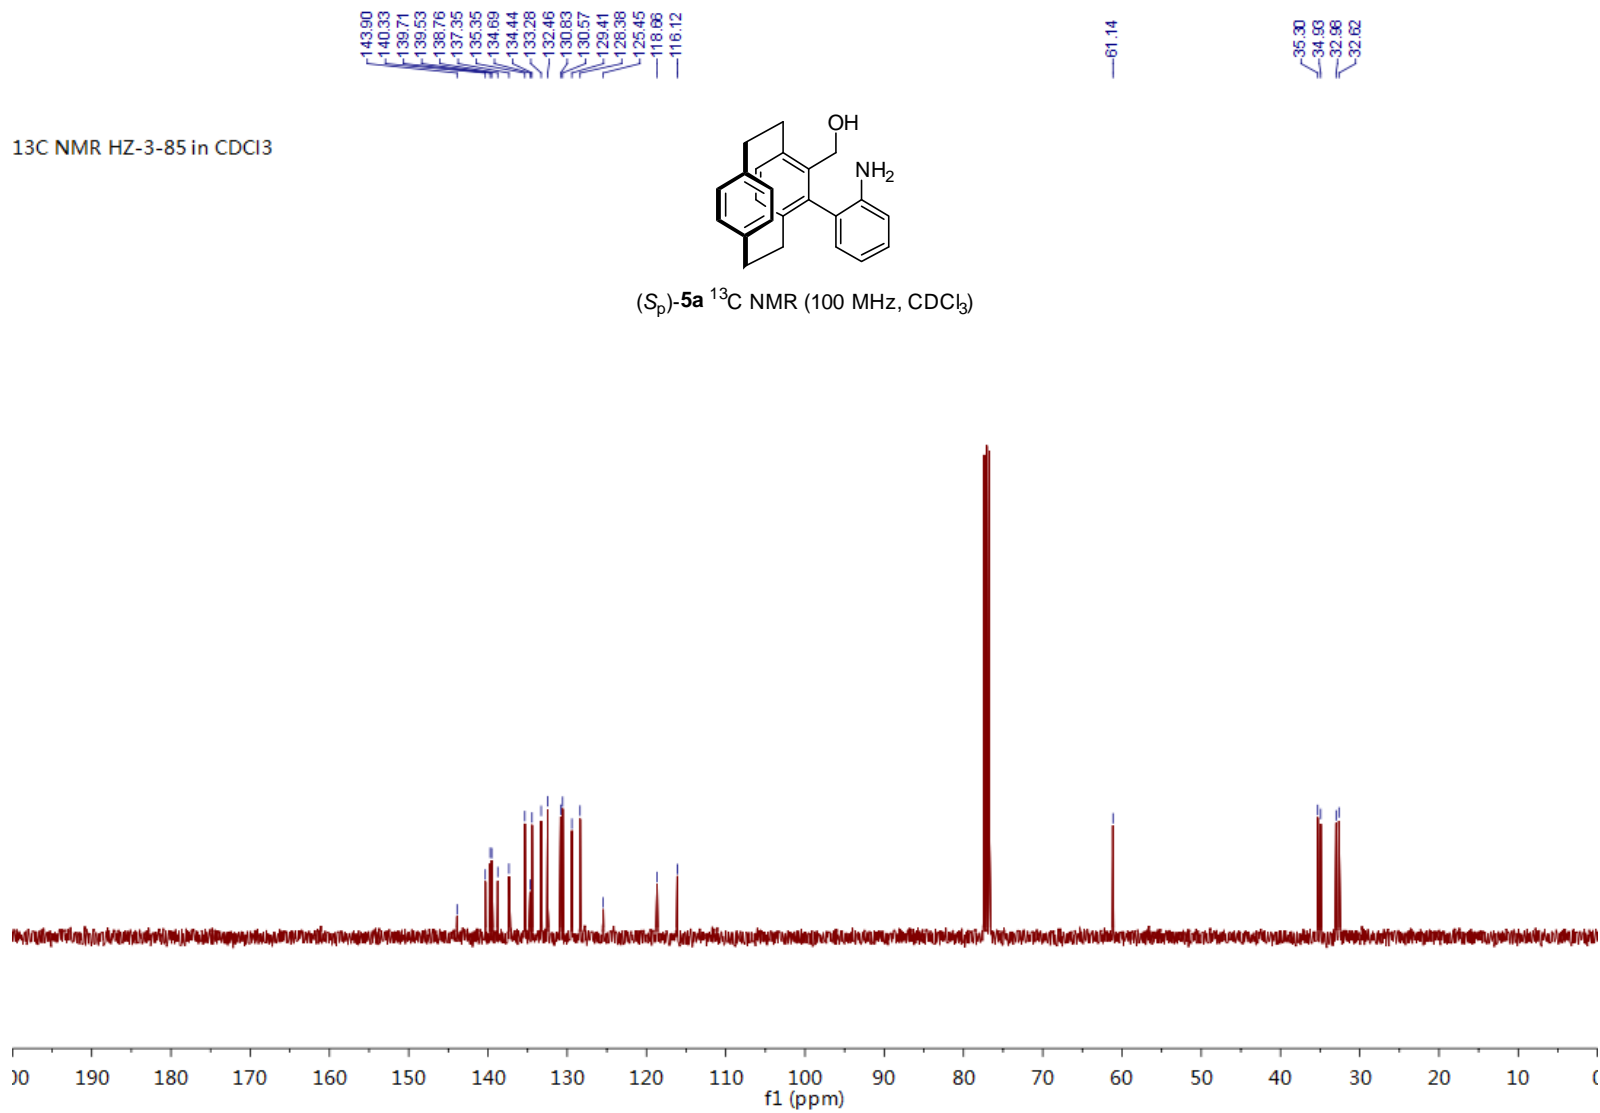

<sup>1</sup>H NMR HZ-3-77 in CDCl<sub>3</sub>

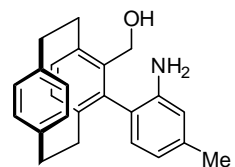

(*S*)-**5b** <sup>1</sup>H NMR (400 MHz, CDCl<sub>3</sub>)

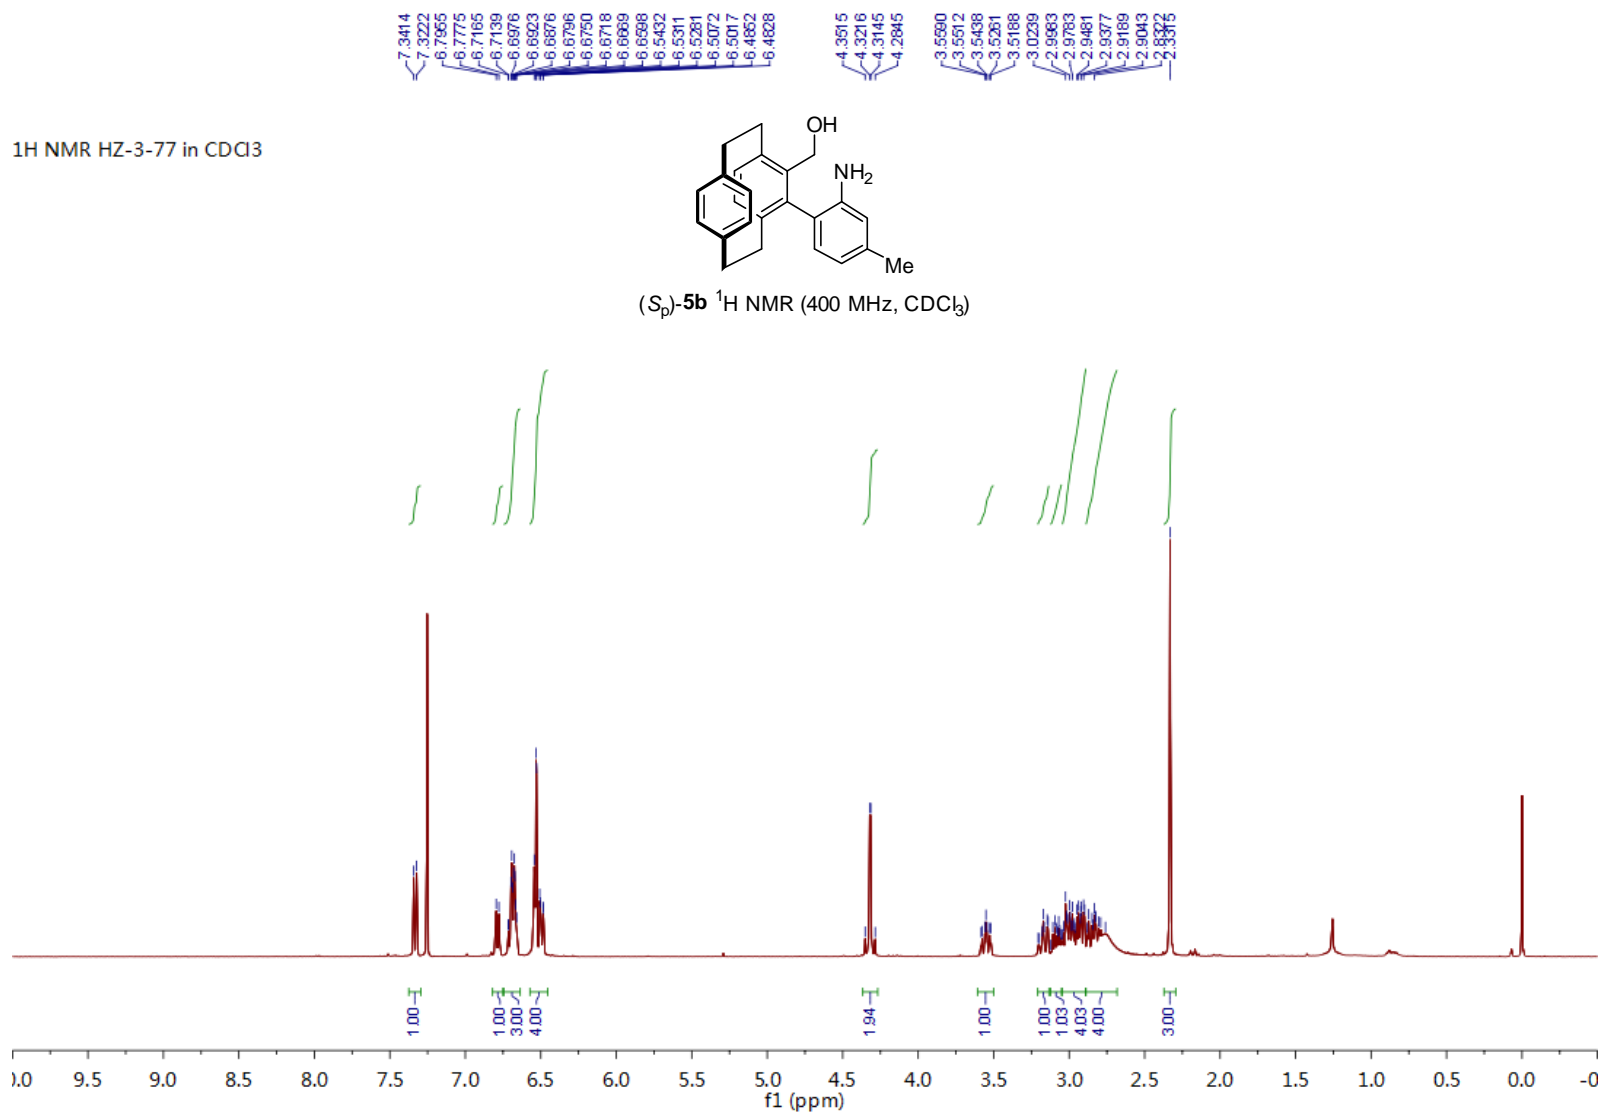

$^{13}\text{C}$  NMR HZ-3-77 in  $\text{CDCl}_3$

144.08  
140.22  
139.68  
139.55  
138.95  
138.21  
137.50  
135.18  
134.88  
134.31  
133.27  
132.43  
130.85  
130.57  
129.22  
122.40  
119.38  
116.61

61.17

35.30  
34.94  
33.02  
32.64

21.30

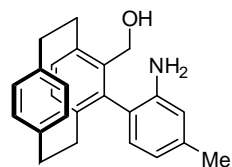

( $S_p$ )-**5b**  $^{13}\text{C}$  NMR (100 MHz,  $\text{CDCl}_3$ )

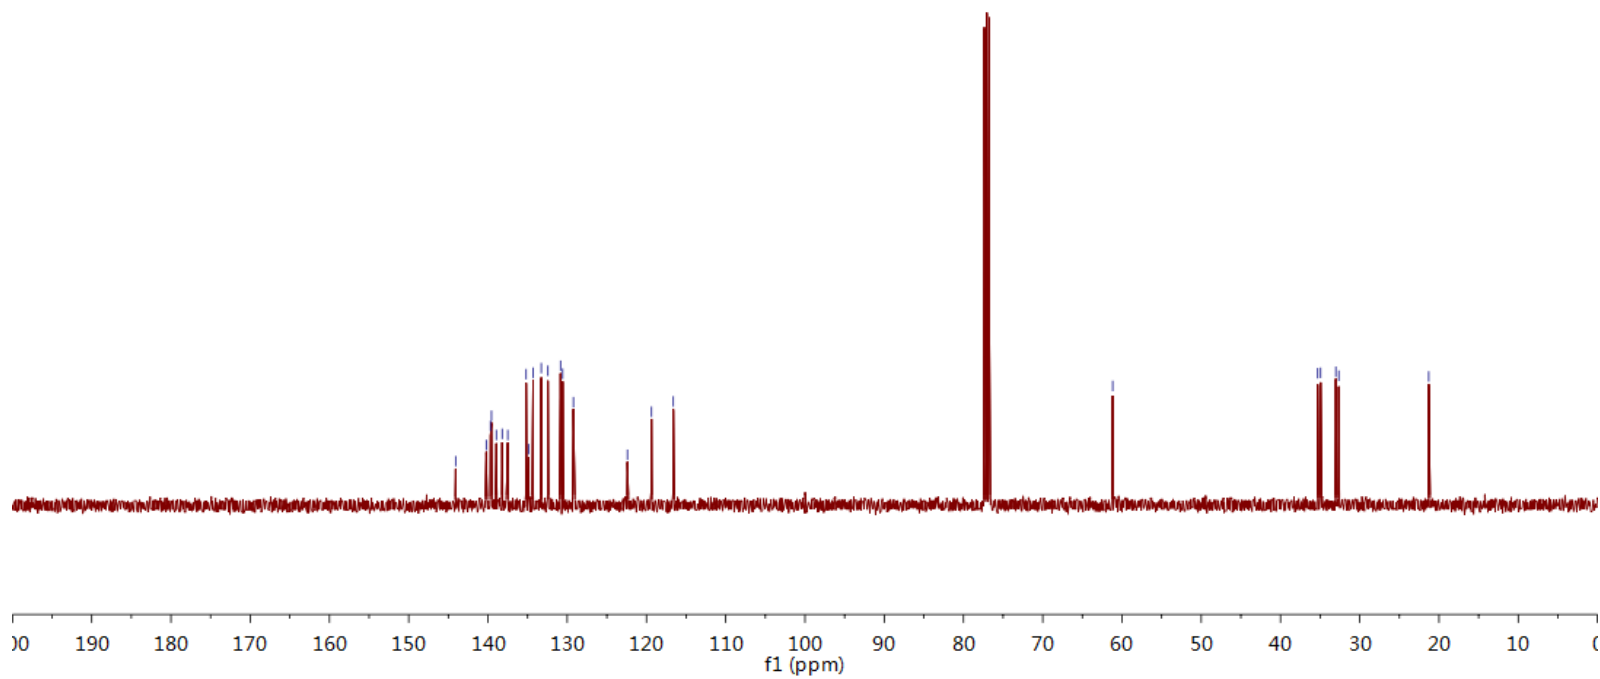

$^1\text{H}$  NMR HZ-3-96 in  $\text{CDCl}_3$

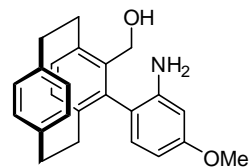

(*S\_p*)-**5c**  $^1\text{H}$  NMR (400 MHz,  $\text{CDCl}_3$ )

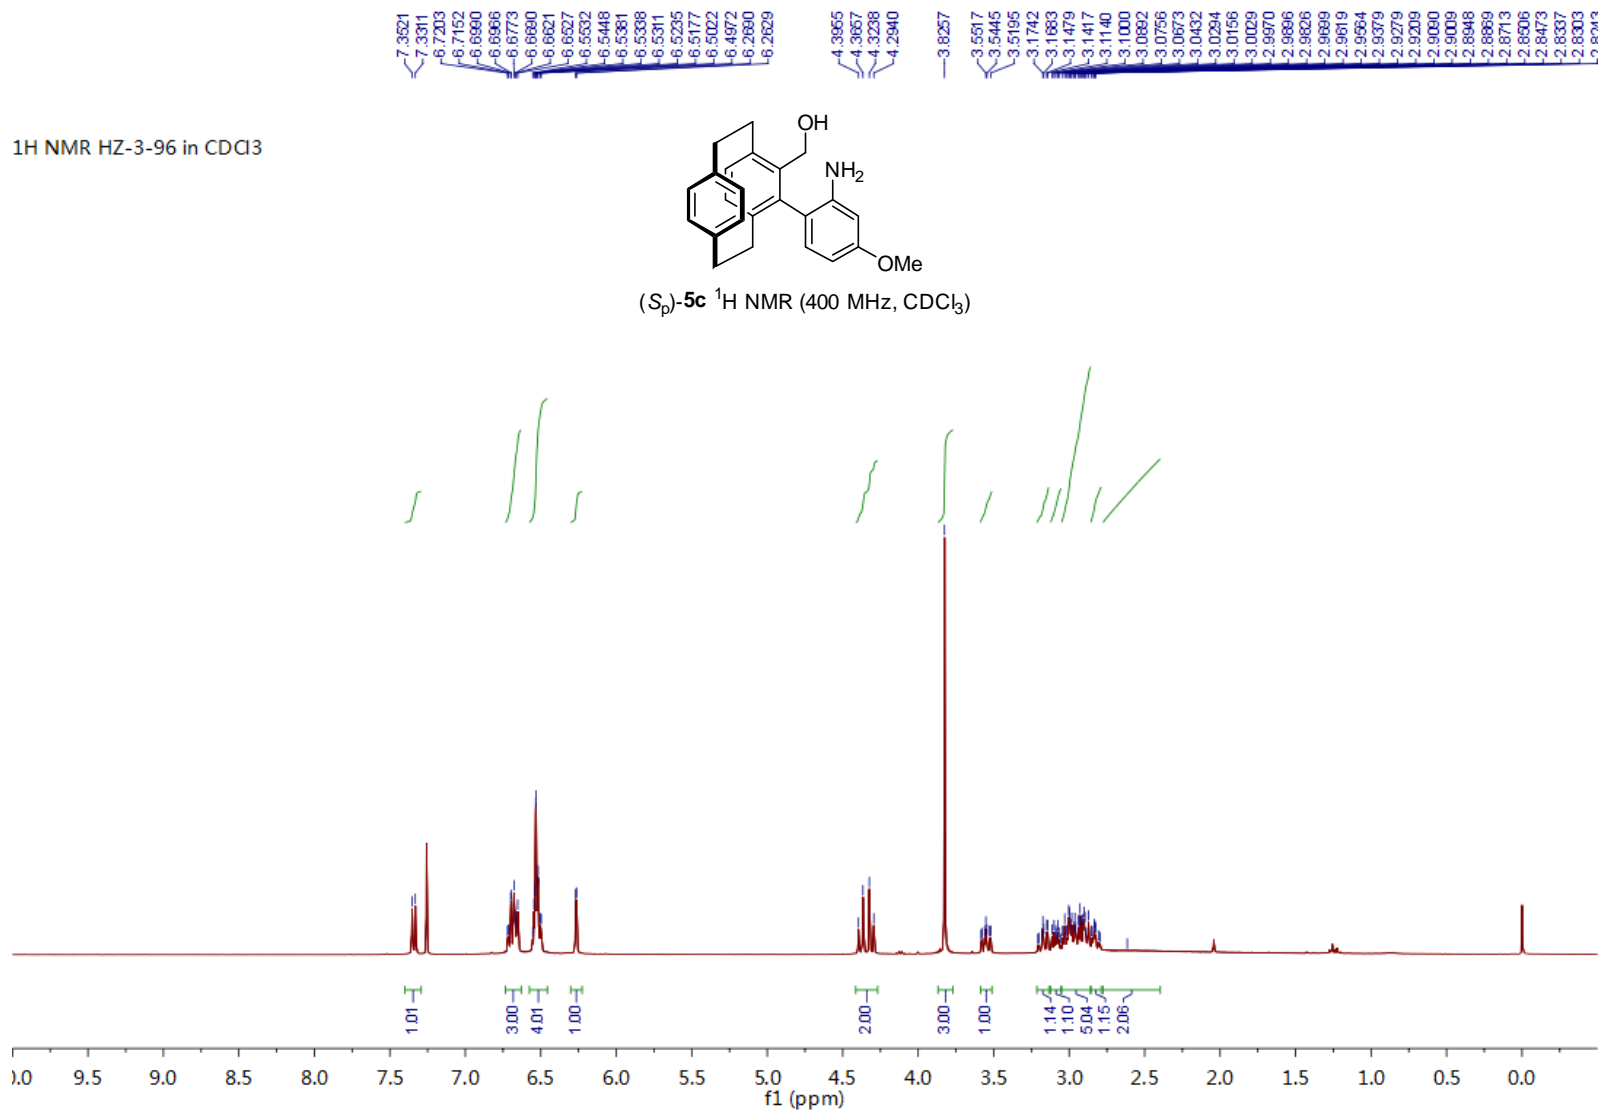



<sup>13</sup>C NMR HZ-3-96 in CDCl<sub>3</sub>

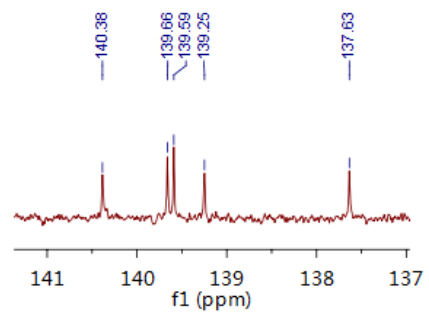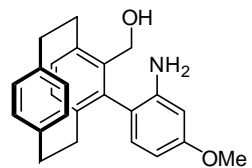

(S<sub>p</sub>)-**5c** <sup>13</sup>C NMR (100 MHz, CDCl<sub>3</sub>)

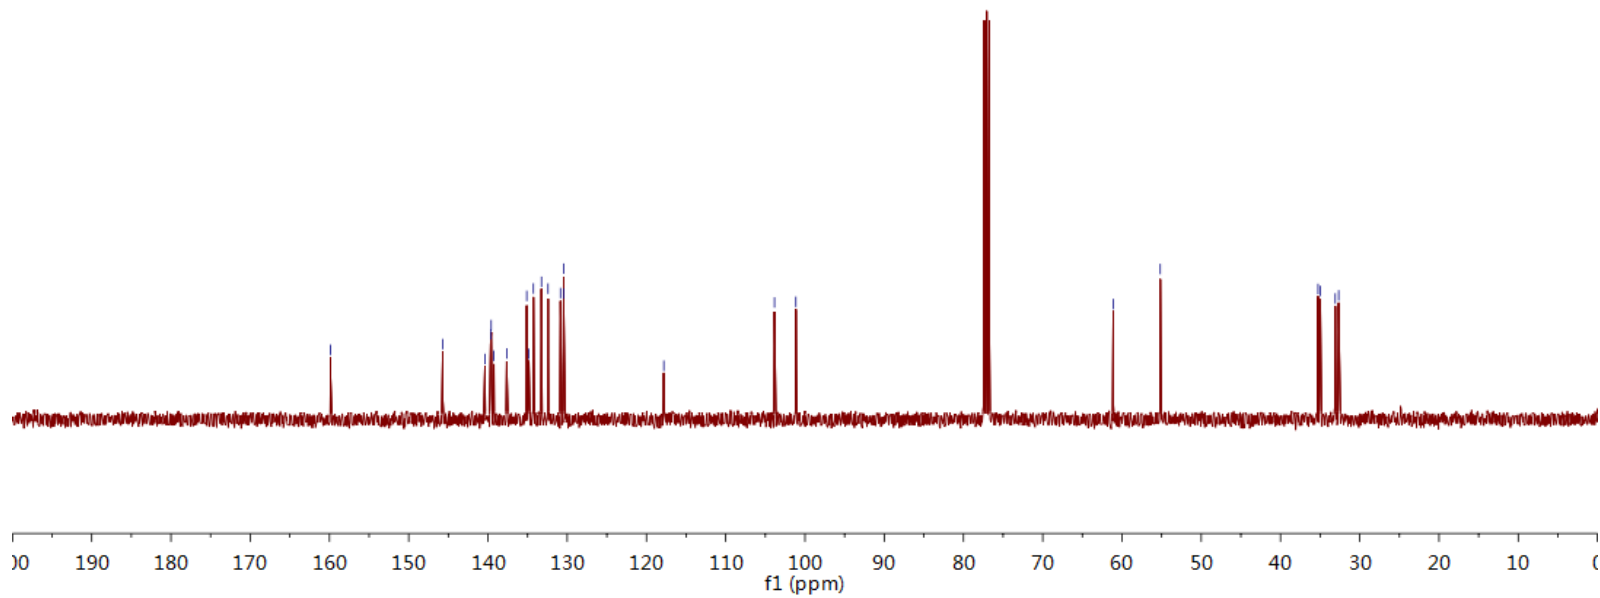

9.1922  
8.5321  
8.5295  
8.5114  
8.5087  
8.1979  
8.1954  
8.1776  
8.1751  
7.7239  
7.7205  
7.7065  
7.7033  
7.7003  
7.6862  
7.6828  
7.6237  
7.6202  
7.6062  
7.6029  
7.5966  
7.5866  
7.5821  
7.0775  
7.0588  
6.8886  
6.8869  
6.5410  
6.5371  
6.5213  
6.5174  
6.4845  
6.4808  
6.4647  
6.4610  
5.8174  
5.8129  
5.7979  
5.7503  
5.3241  
5.3197  
5.3046  
5.3002  
4.3732  
4.3641  
4.3519  
4.3424  
4.3370  
4.3277  
4.3154  
4.3064  
4.0516  
4.0477  
4.0260  
4.0228  
4.0177  
3.9917  
3.3442  
3.3248  
3.3001  
3.2885  
3.2717  
3.2453  
3.2415  
3.1786  
3.1609  
3.1425  
3.1349  
3.1285  
3.1019  
3.0824  
3.0681  
3.0577  
3.0517  
3.0424  
3.0354  
3.0285  
3.0191  
3.0099  
2.9960  
2.9870  
2.6386  
2.6202  
2.6060  
2.8005  
2.7868  
2.7667

<sup>1</sup>H NMR HZ-3-88 in CDCl<sub>3</sub>

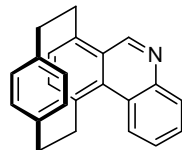

(*S*)-**6a** <sup>1</sup>H NMR (400 MHz, CDCl<sub>3</sub>)

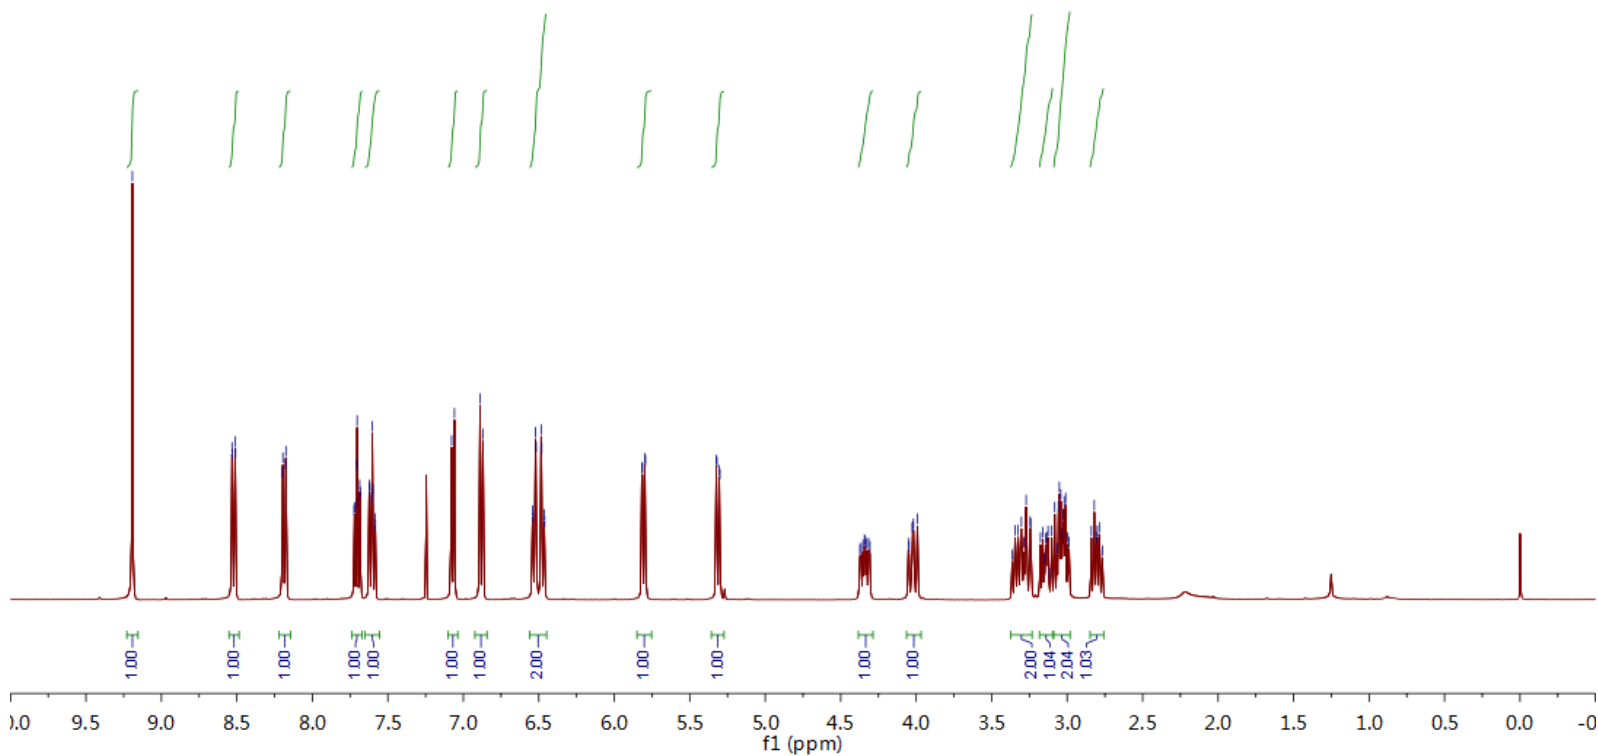

$^{13}\text{C}$  NMR HZ-3-88 in  $\text{CDCl}_3$

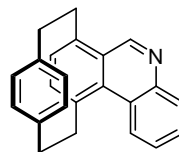

(*S\_p*)-**6a**  $^{13}\text{C}$  NMR (100 MHz,  $\text{CDCl}_3$ )

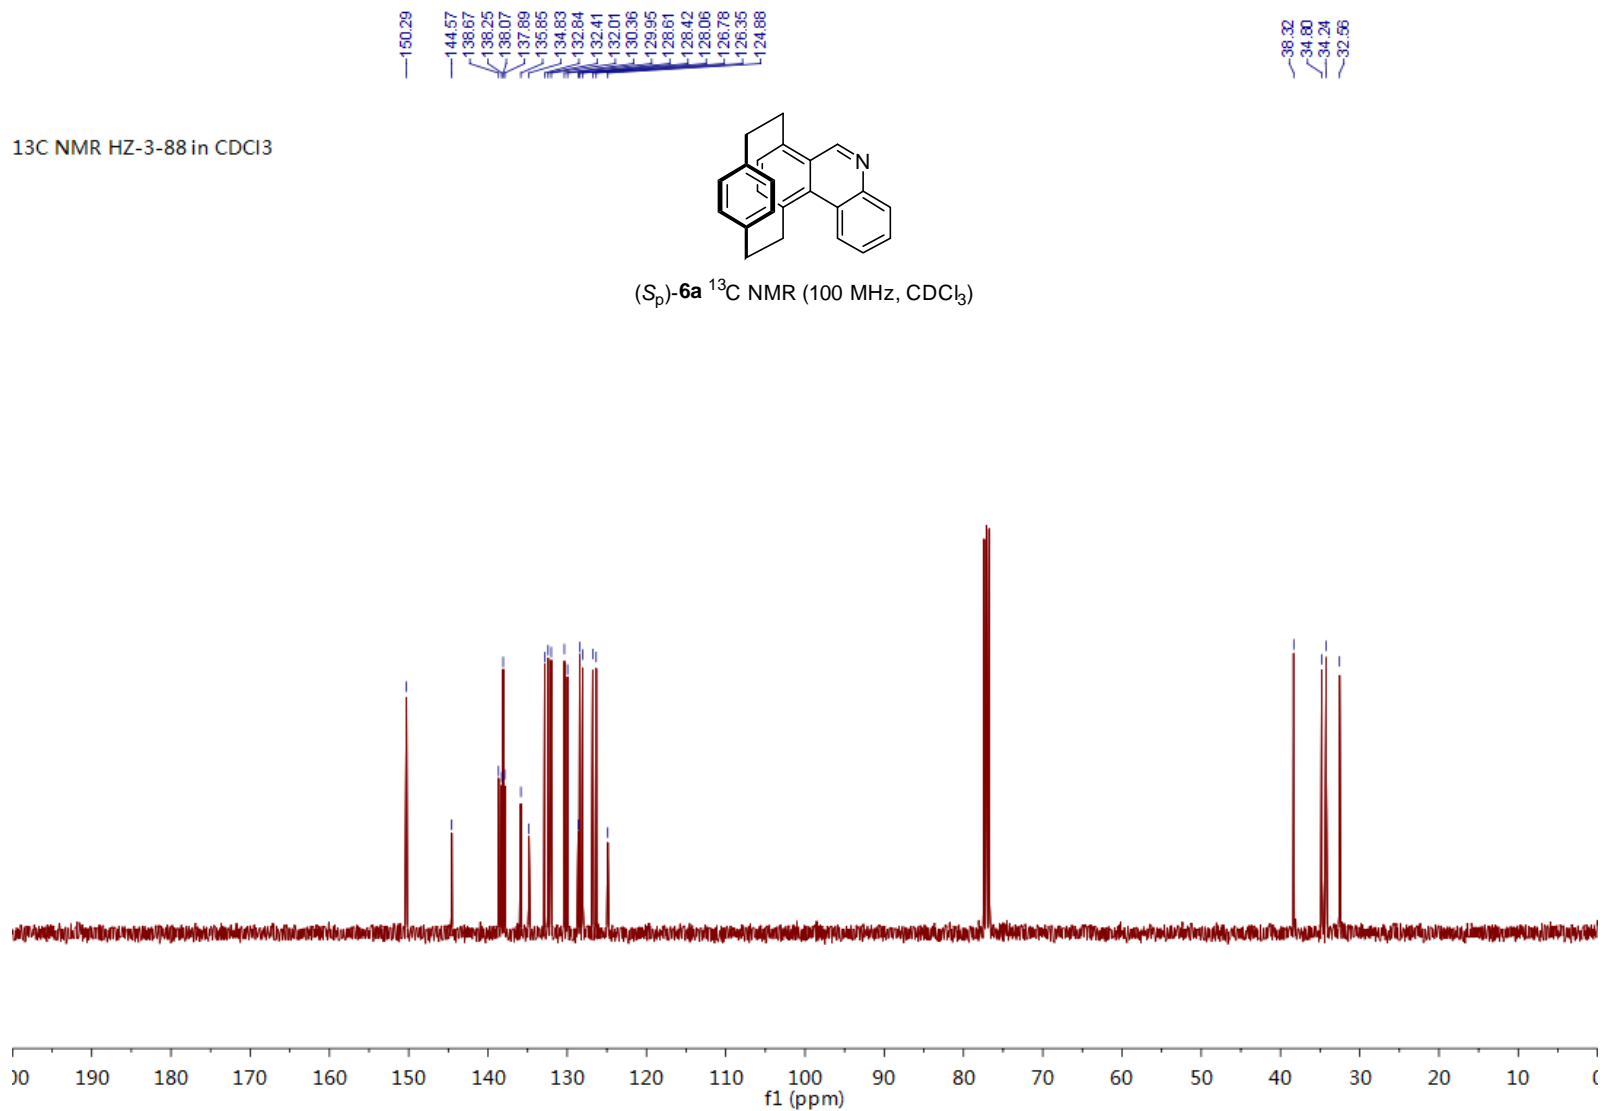

<sup>1</sup>H NMR HZ-3-81 in CDCl<sub>3</sub>

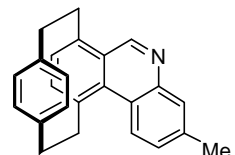

(S<sub>p</sub>)-**6b** <sup>1</sup>H NMR (400 MHz, CDCl<sub>3</sub>)

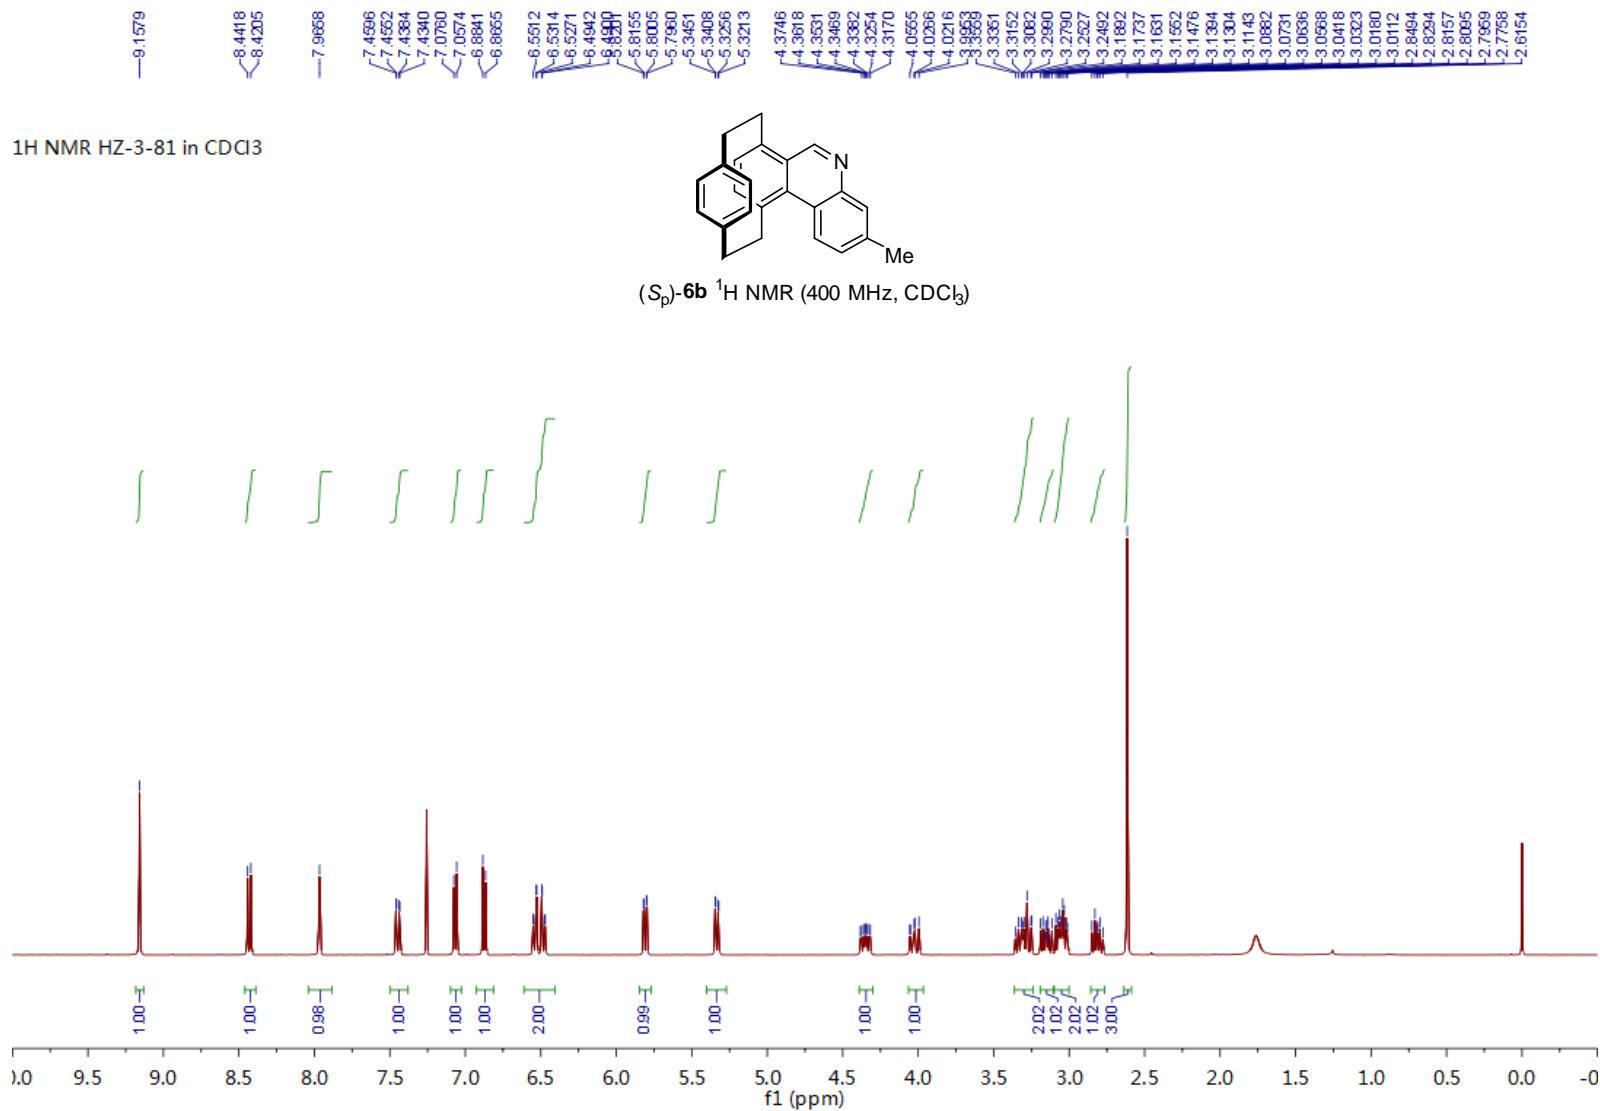

$^{13}\text{C}$  NMR HZ-3-81 in  $\text{CDCl}_3$

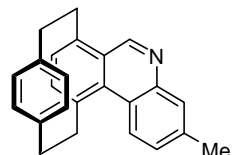

$(S_p)\text{-6b}$   $^{13}\text{C}$  NMR (100 MHz,  $\text{CDCl}_3$ )

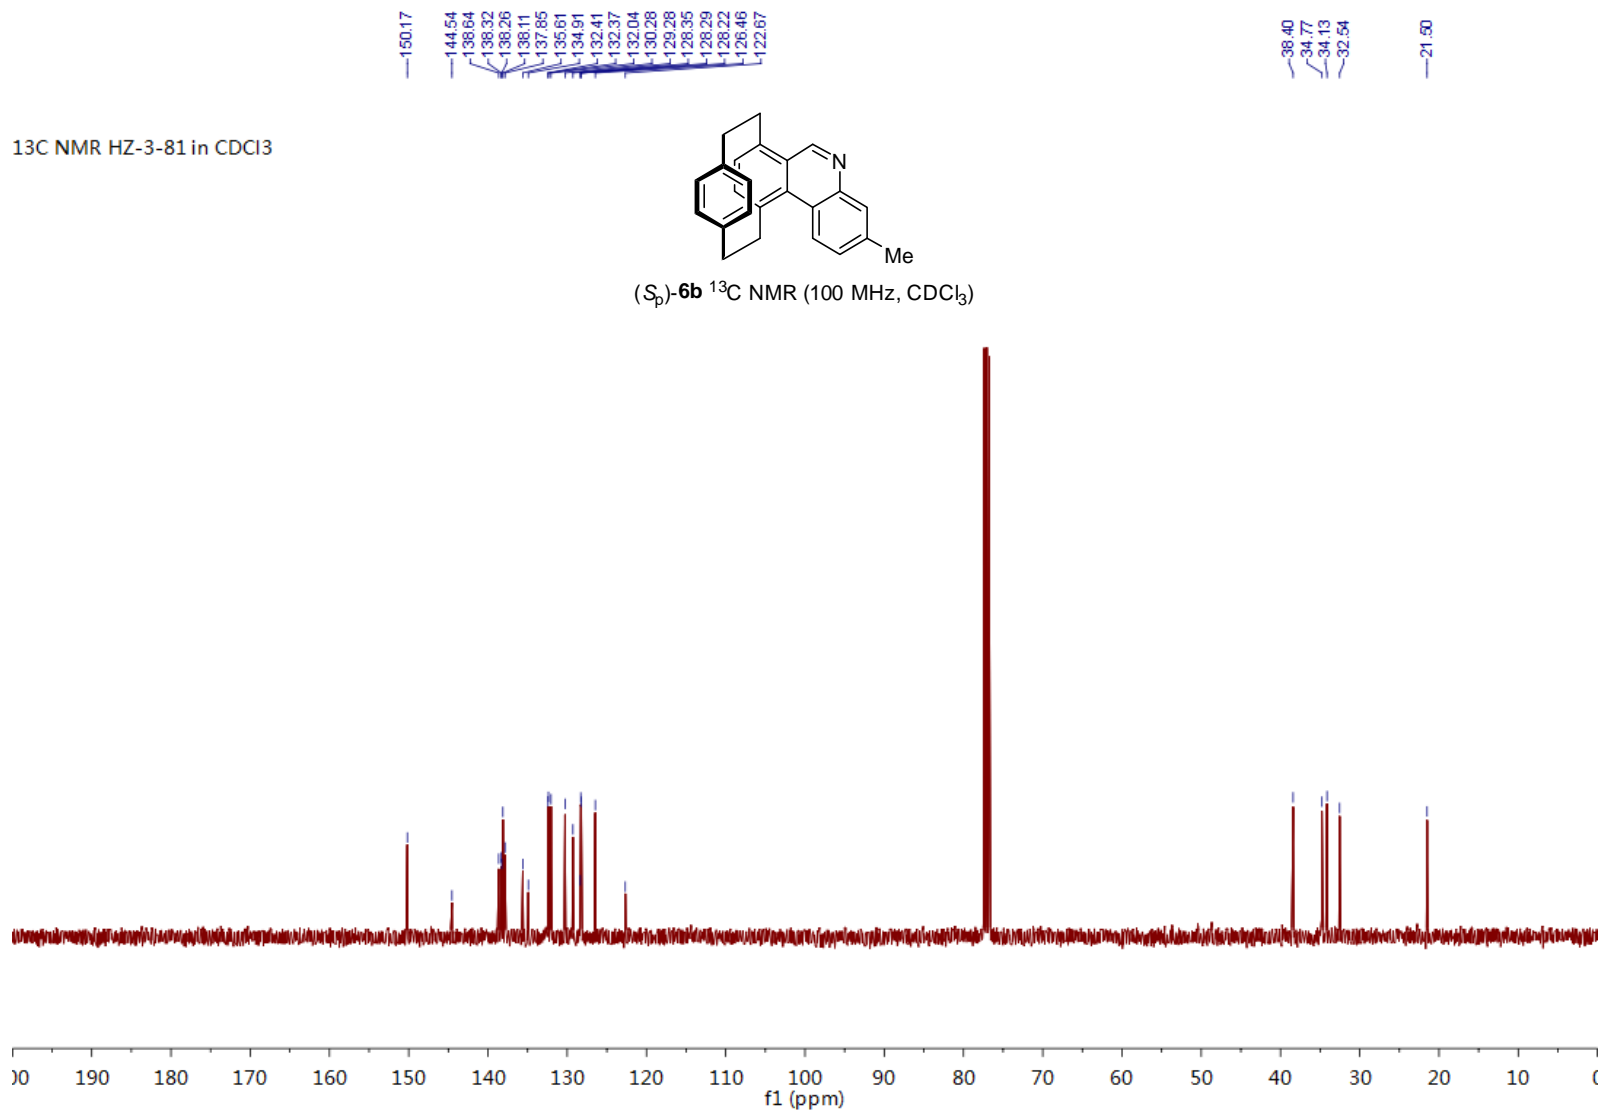

<sup>1</sup>H NMR HZ-3-98 in CDCl<sub>3</sub>

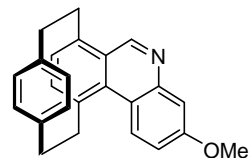

(S<sub>p</sub>)-**6c** <sup>1</sup>H NMR (400 MHz, CDCl<sub>3</sub>)

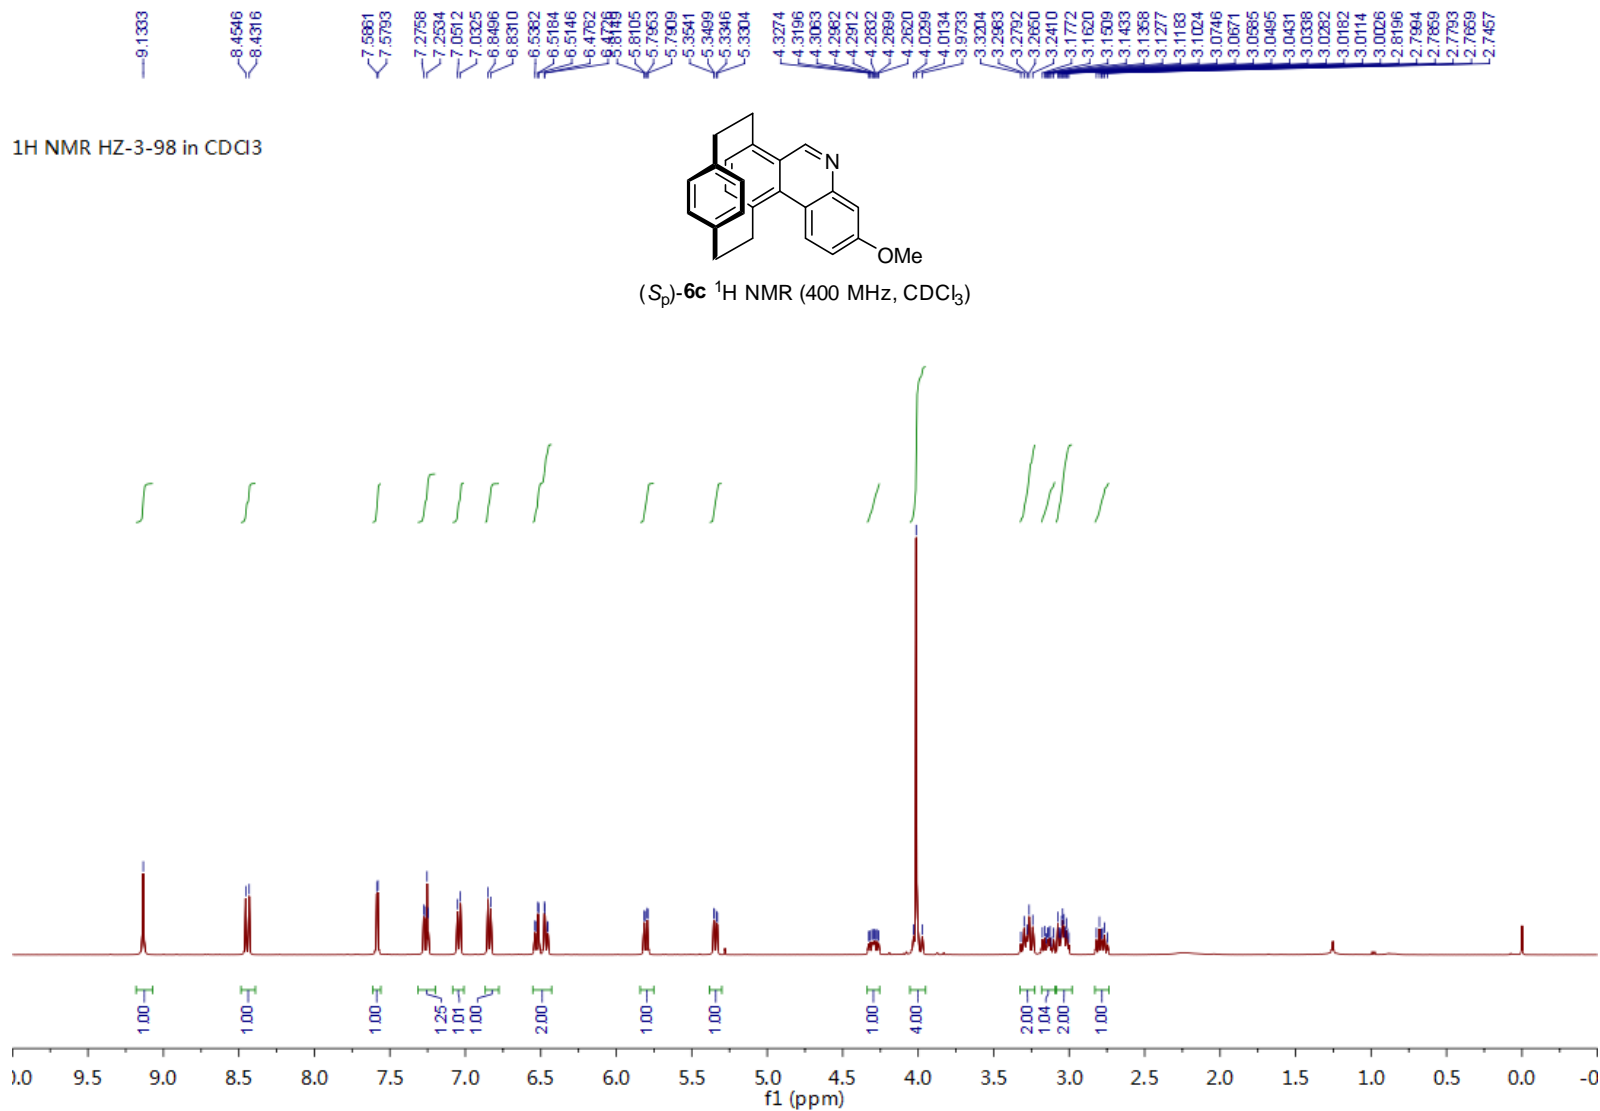

<sup>13</sup>C NMR HZ-3-98 in CDCl<sub>3</sub>

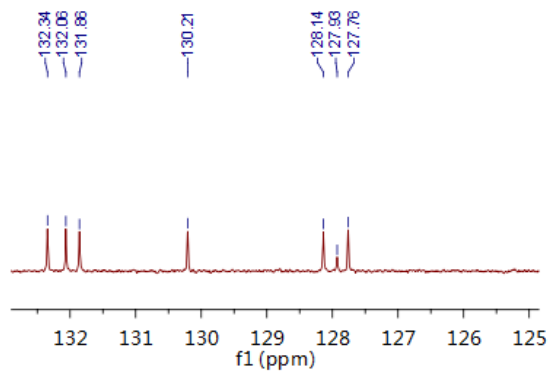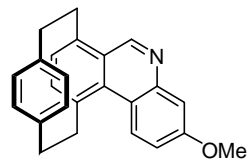

(S<sub>p</sub>)-**6c** <sup>13</sup>C NMR (100 MHz, CDCl<sub>3</sub>)

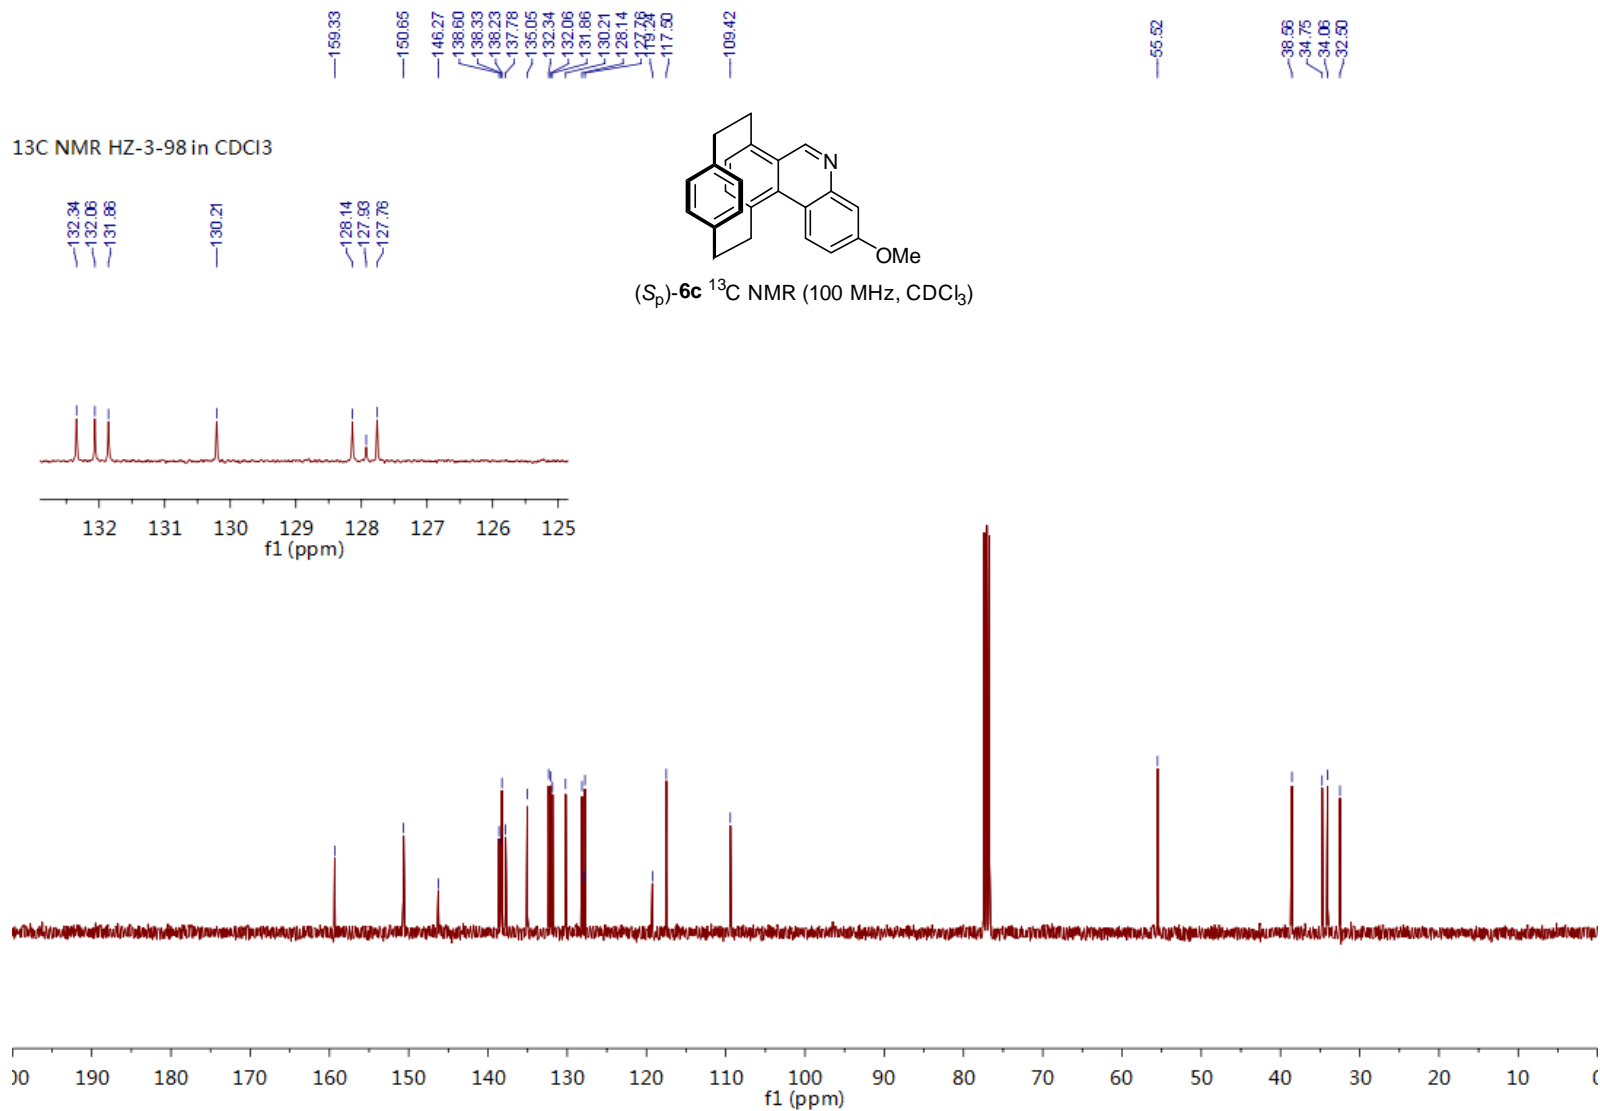

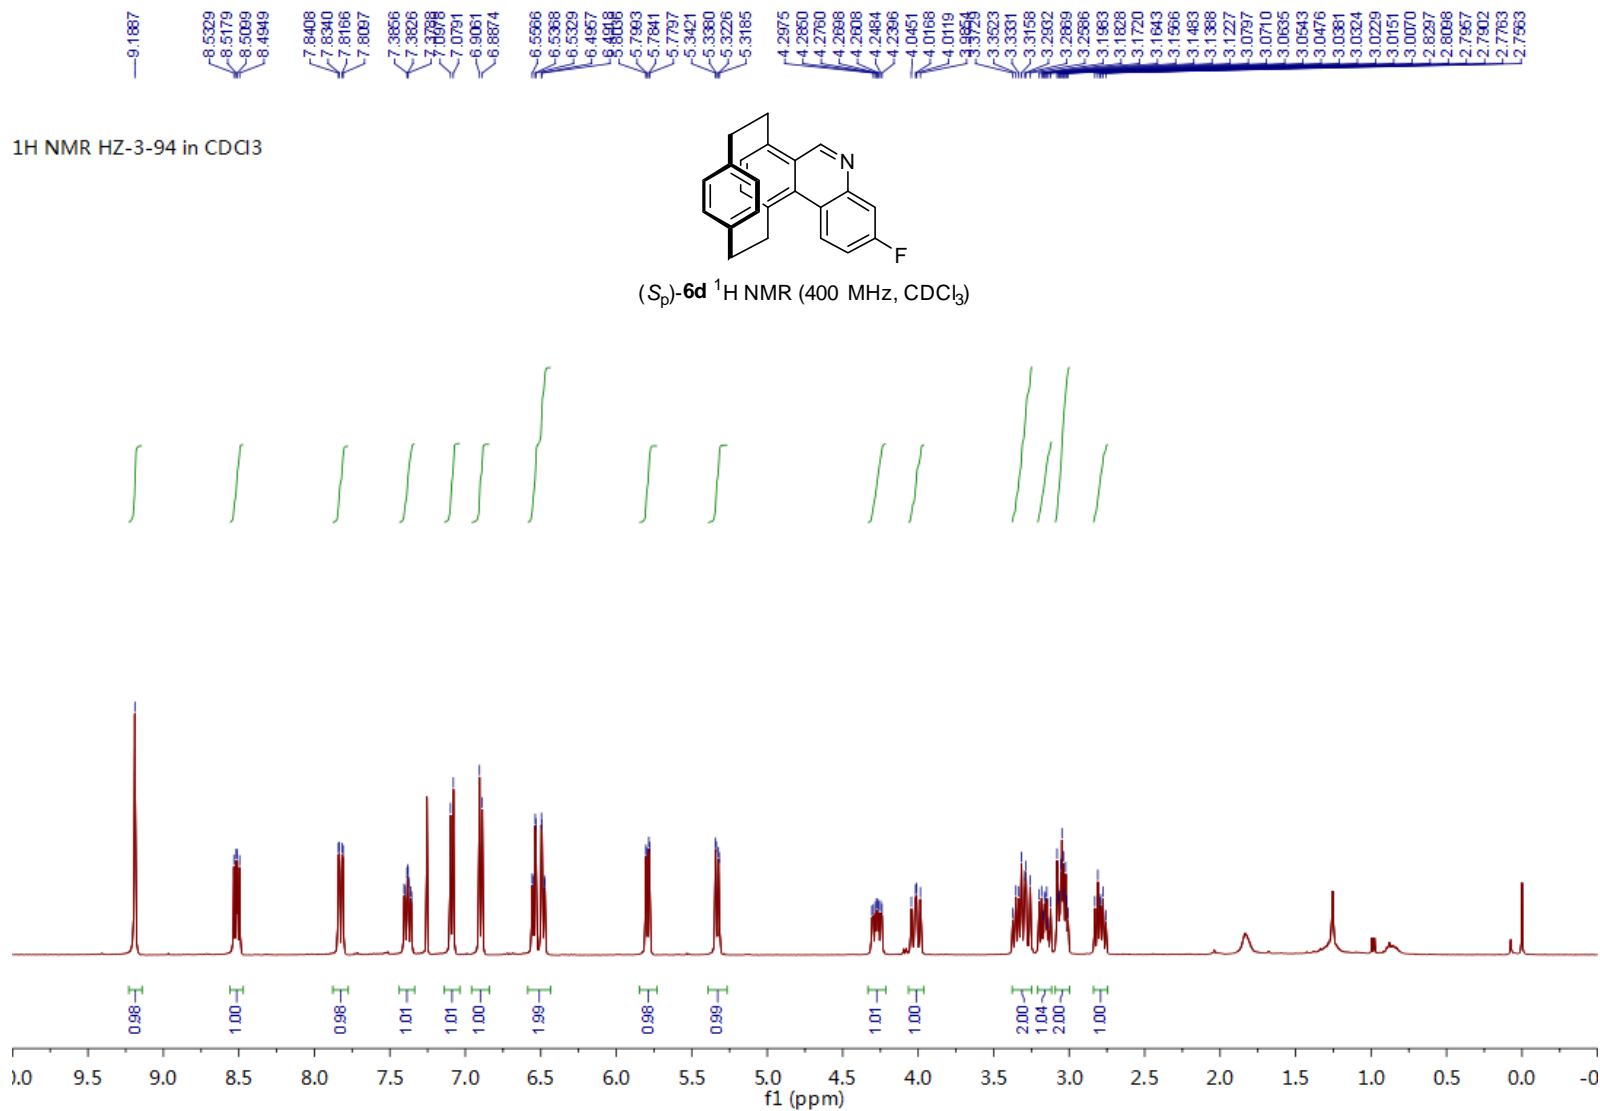



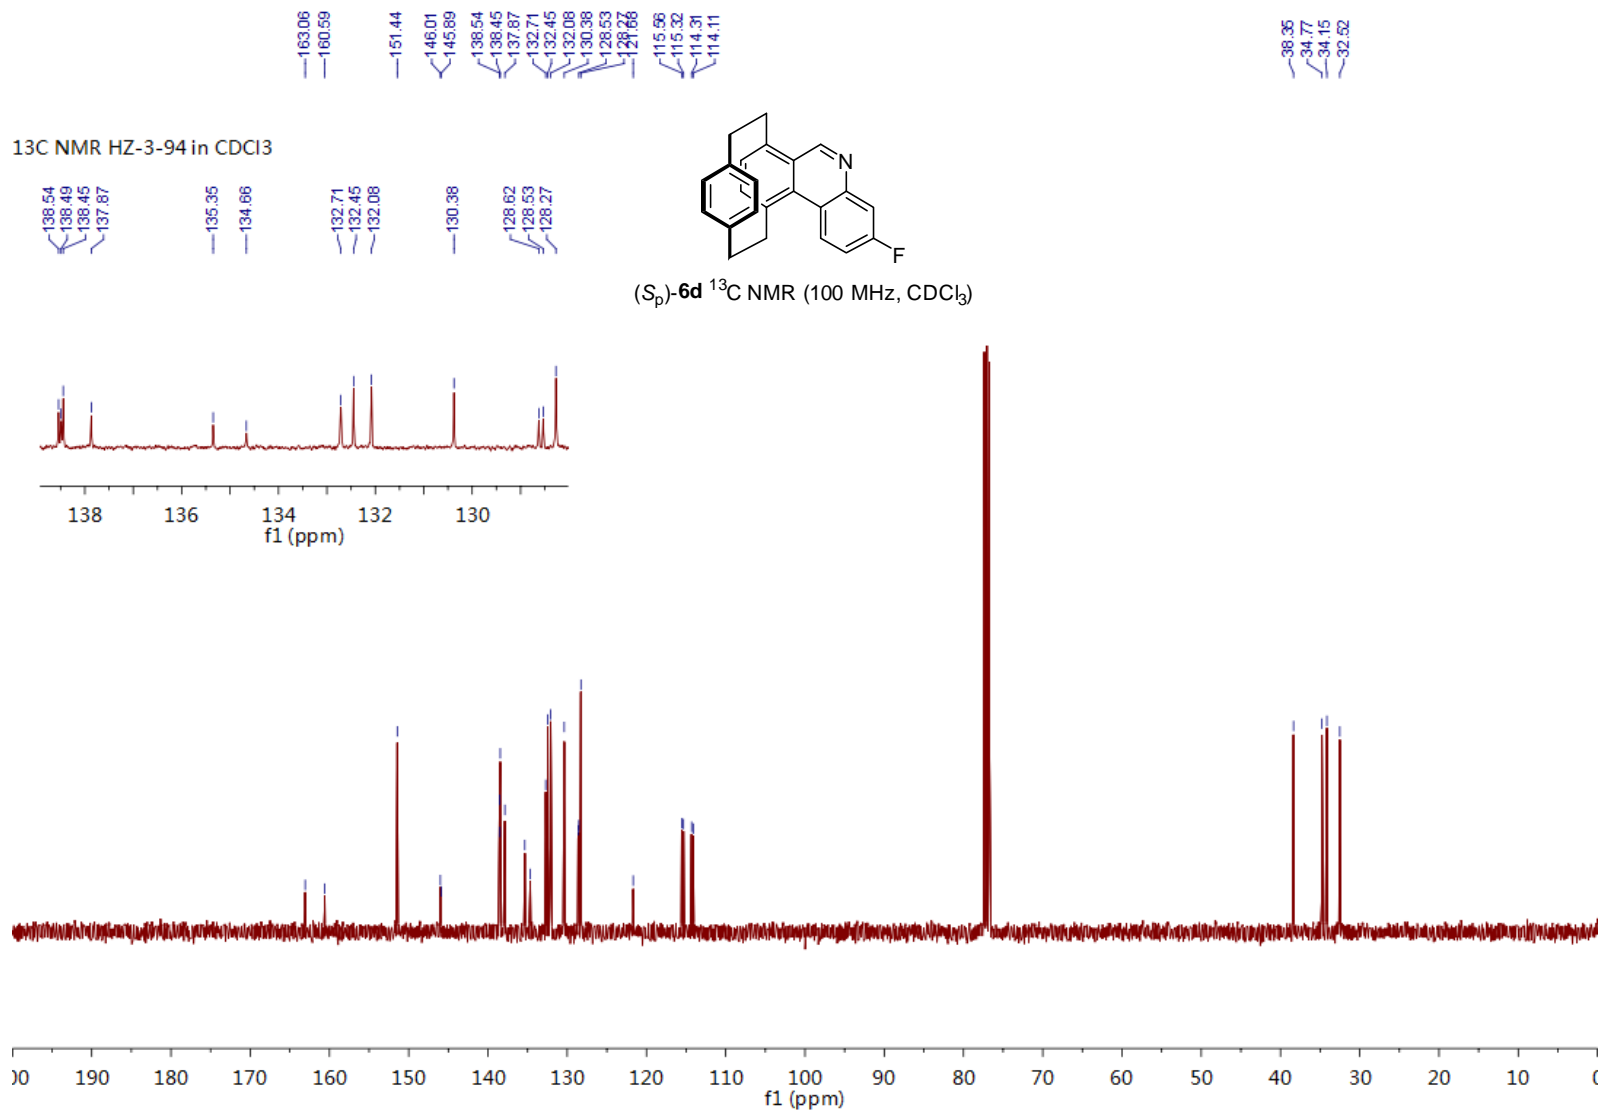

$^{19}\text{F}$  NMR HZ-3-94 in  $\text{CDCl}_3$

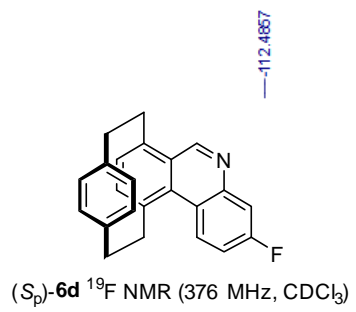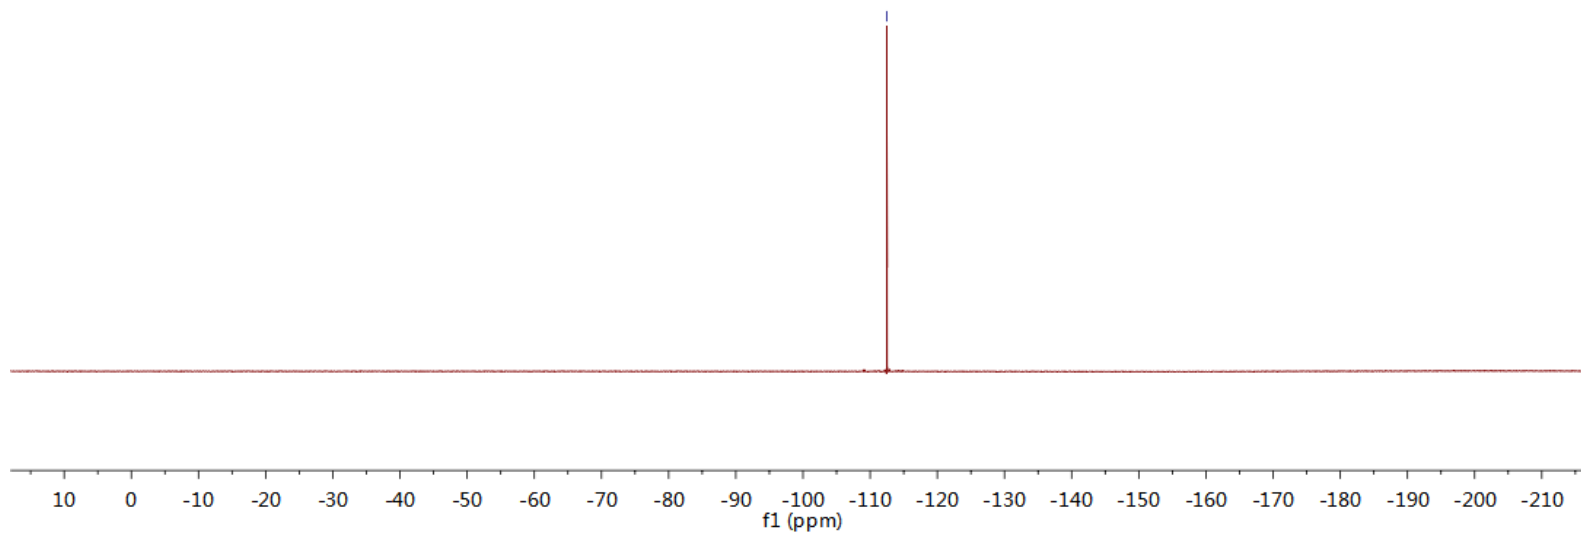

<sup>1</sup>H NMR HZ-5-66 in CDCl<sub>3</sub>

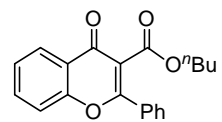

**7d** <sup>1</sup>H NMR (400 MHz, CDCl<sub>3</sub>)

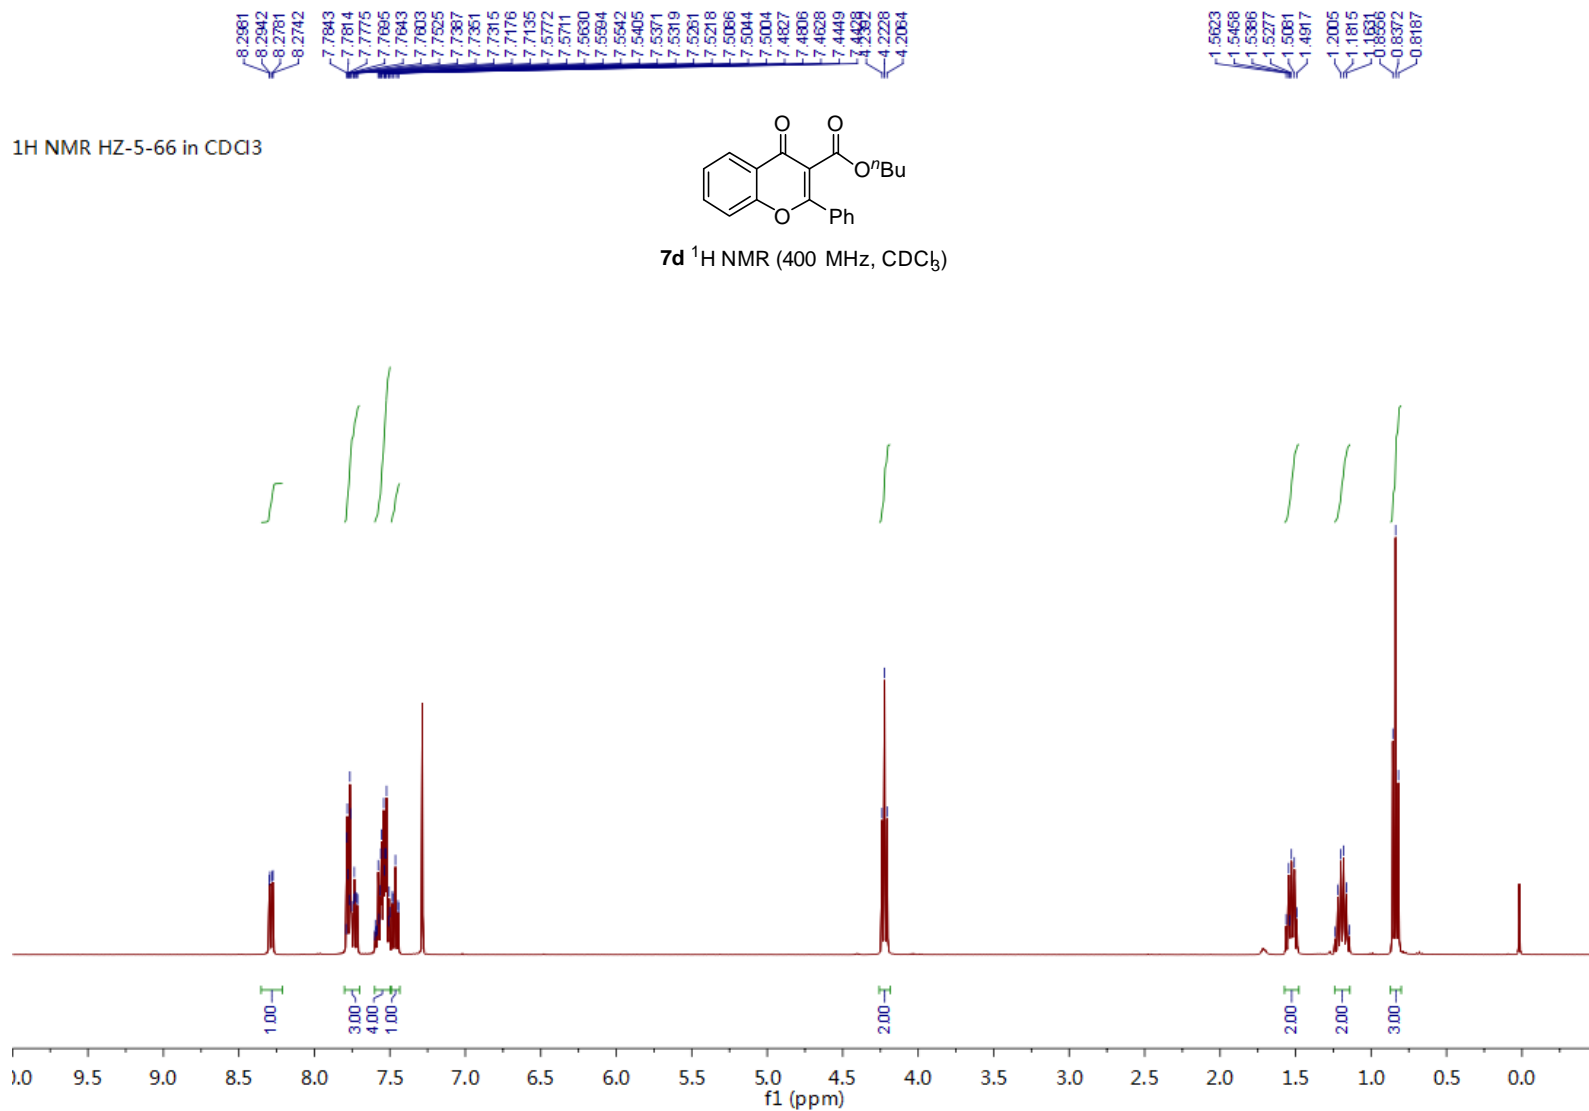

<sup>13</sup>C NMR HZ-5-66 in CDCl<sub>3</sub>

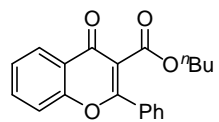

7d <sup>13</sup>C NMR (100 MHz, CDCl<sub>3</sub>)

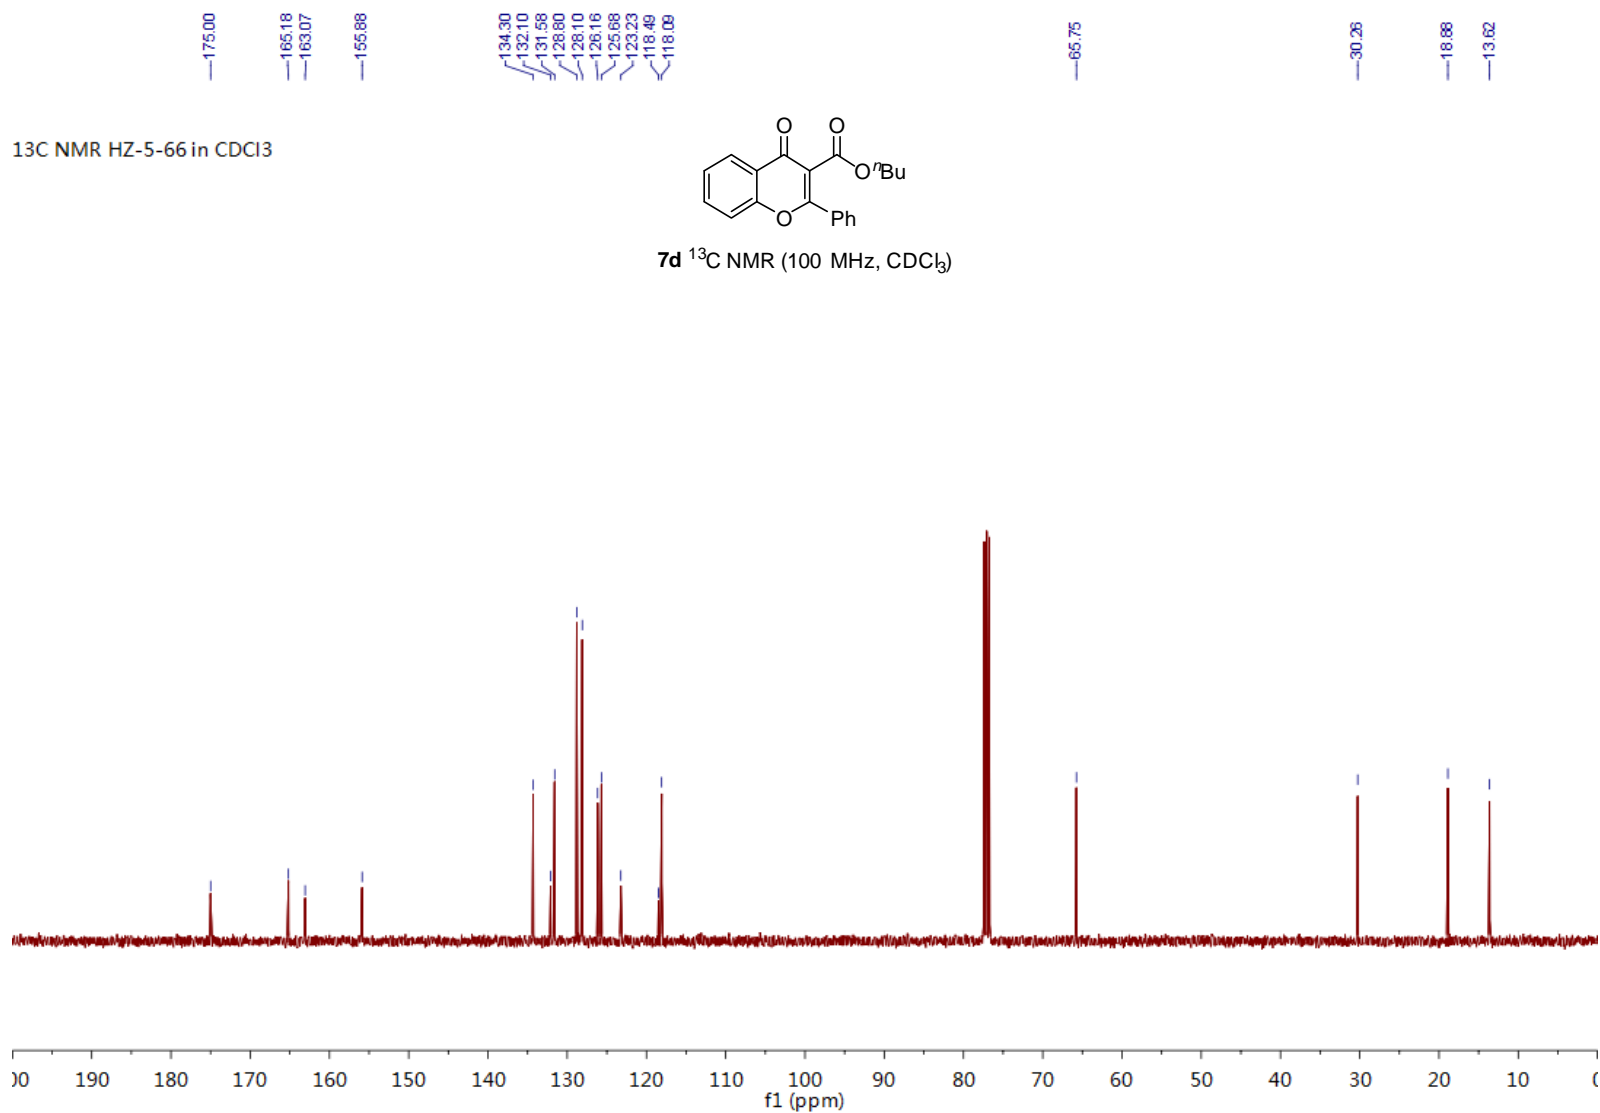

<sup>1</sup>H NMR HZ-5-60 in CDCl<sub>3</sub>

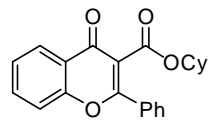

**7g** <sup>1</sup>H NMR (400 MHz, CDCl<sub>3</sub>)

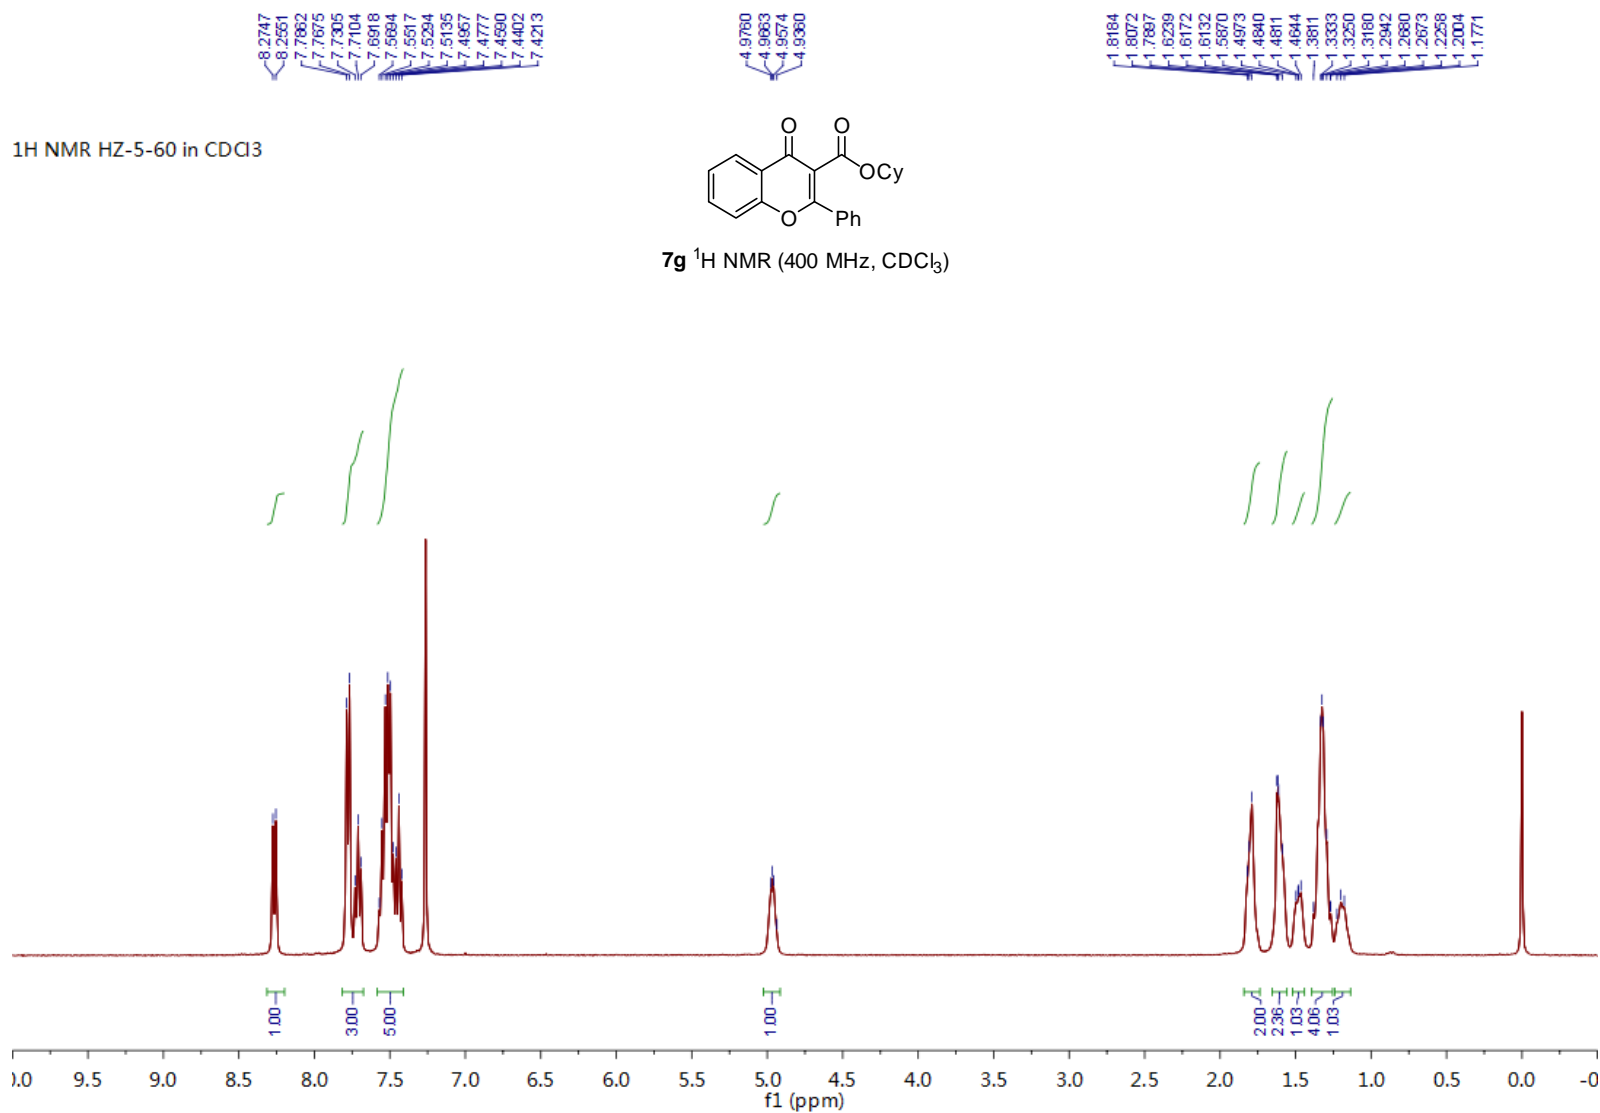

<sup>13</sup>C NMR HZ-5-60 in CDCl<sub>3</sub>

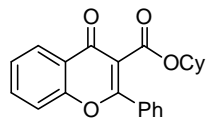

**7g** <sup>13</sup>C NMR (100 MHz, CDCl<sub>3</sub>)

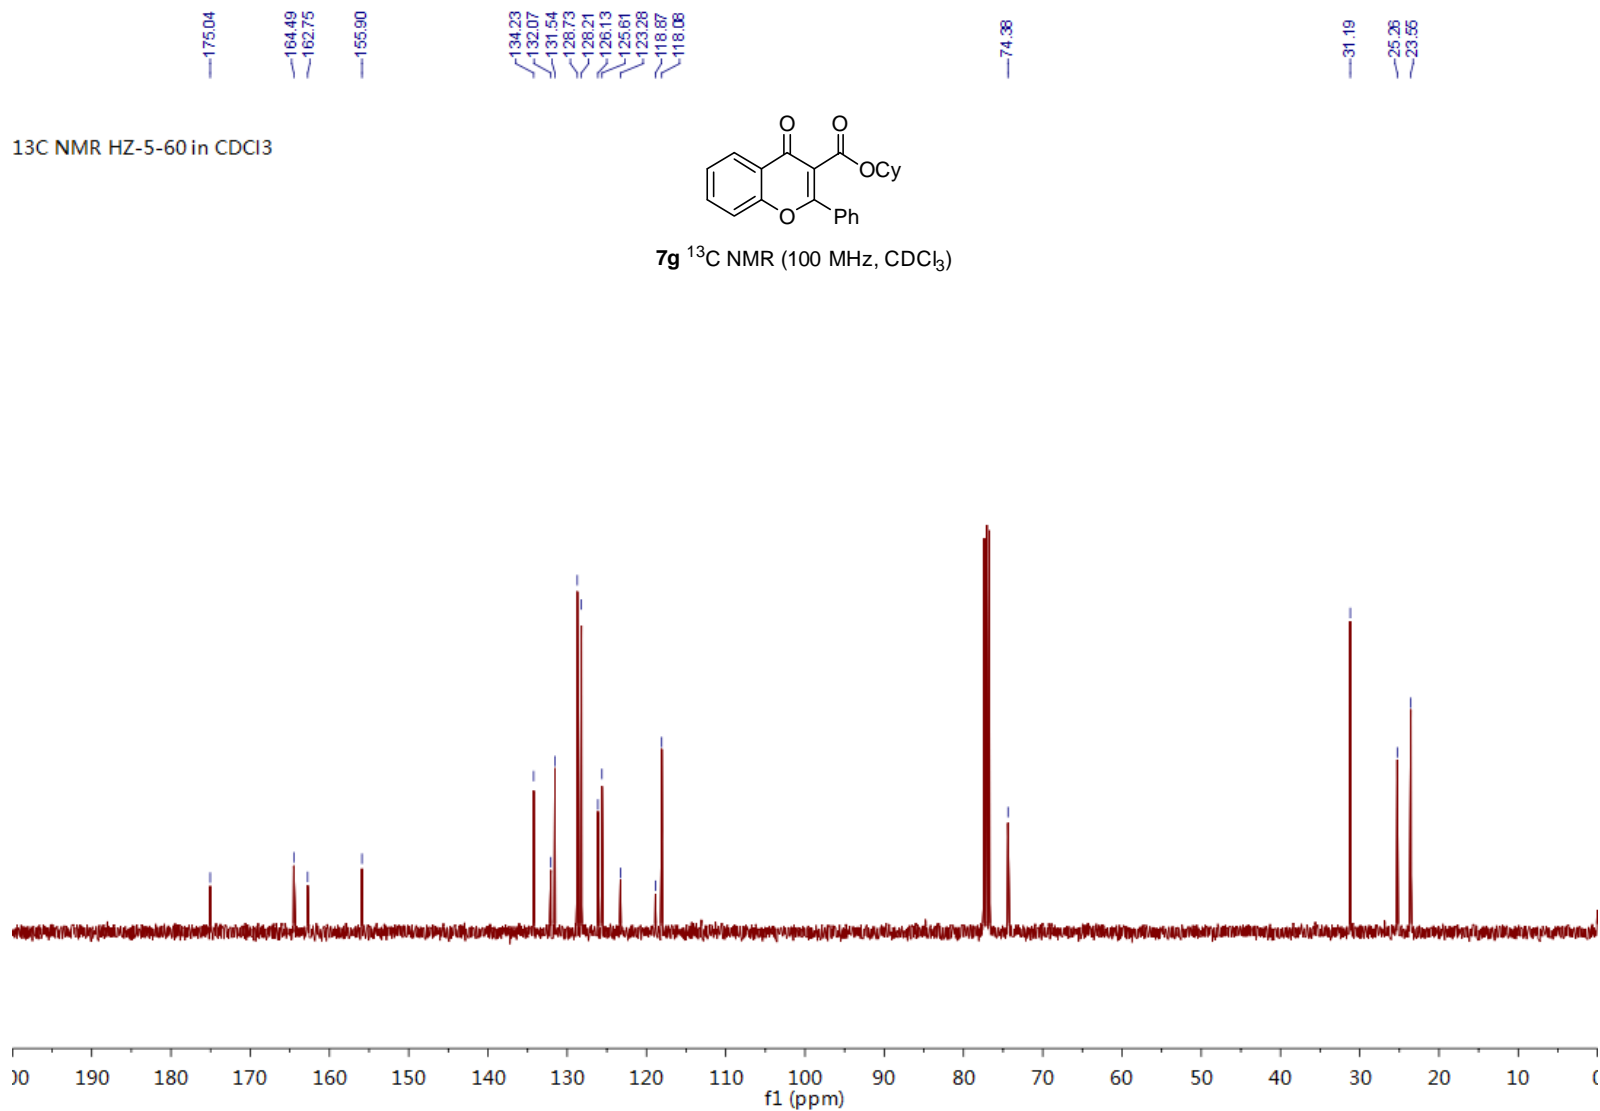

<sup>1</sup>H NMR HZ-5-80B in CDCl<sub>3</sub>

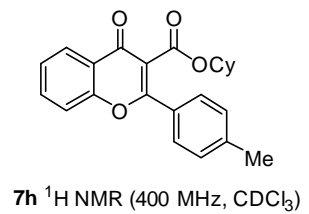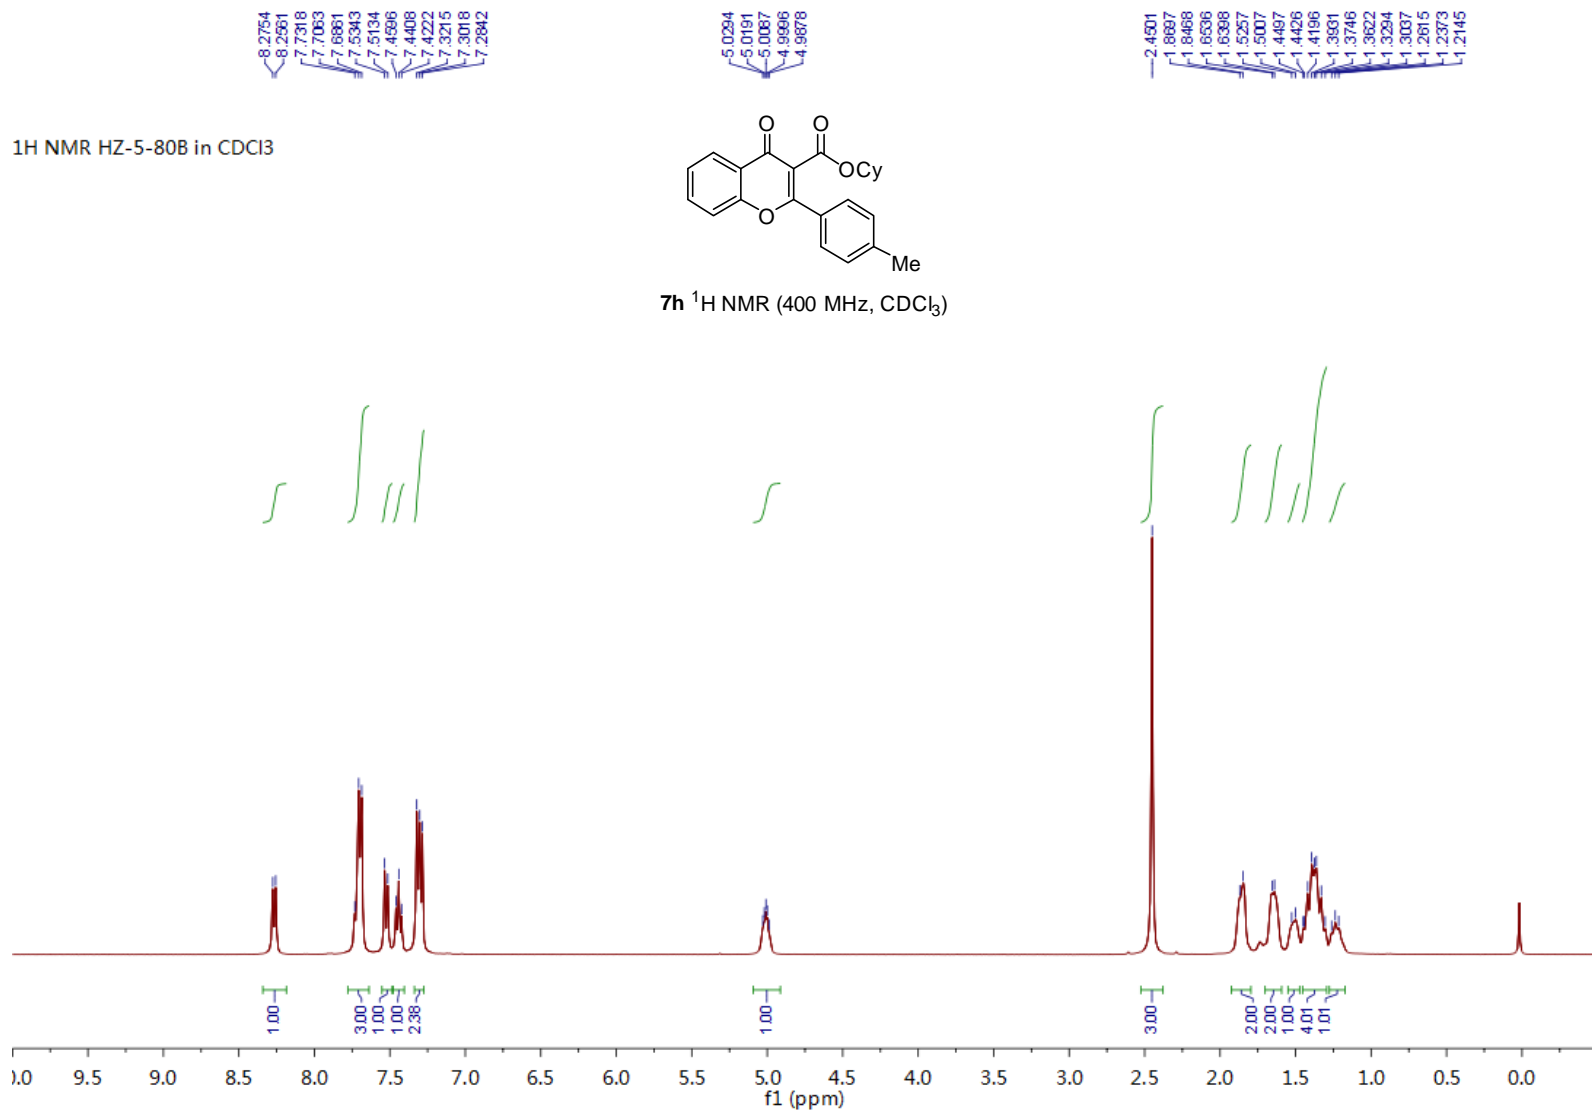

<sup>13</sup>C NMR HZ-5-80B in CDCl<sub>3</sub>

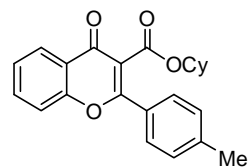

7h <sup>13</sup>C NMR (100 MHz, CDCl<sub>3</sub>)

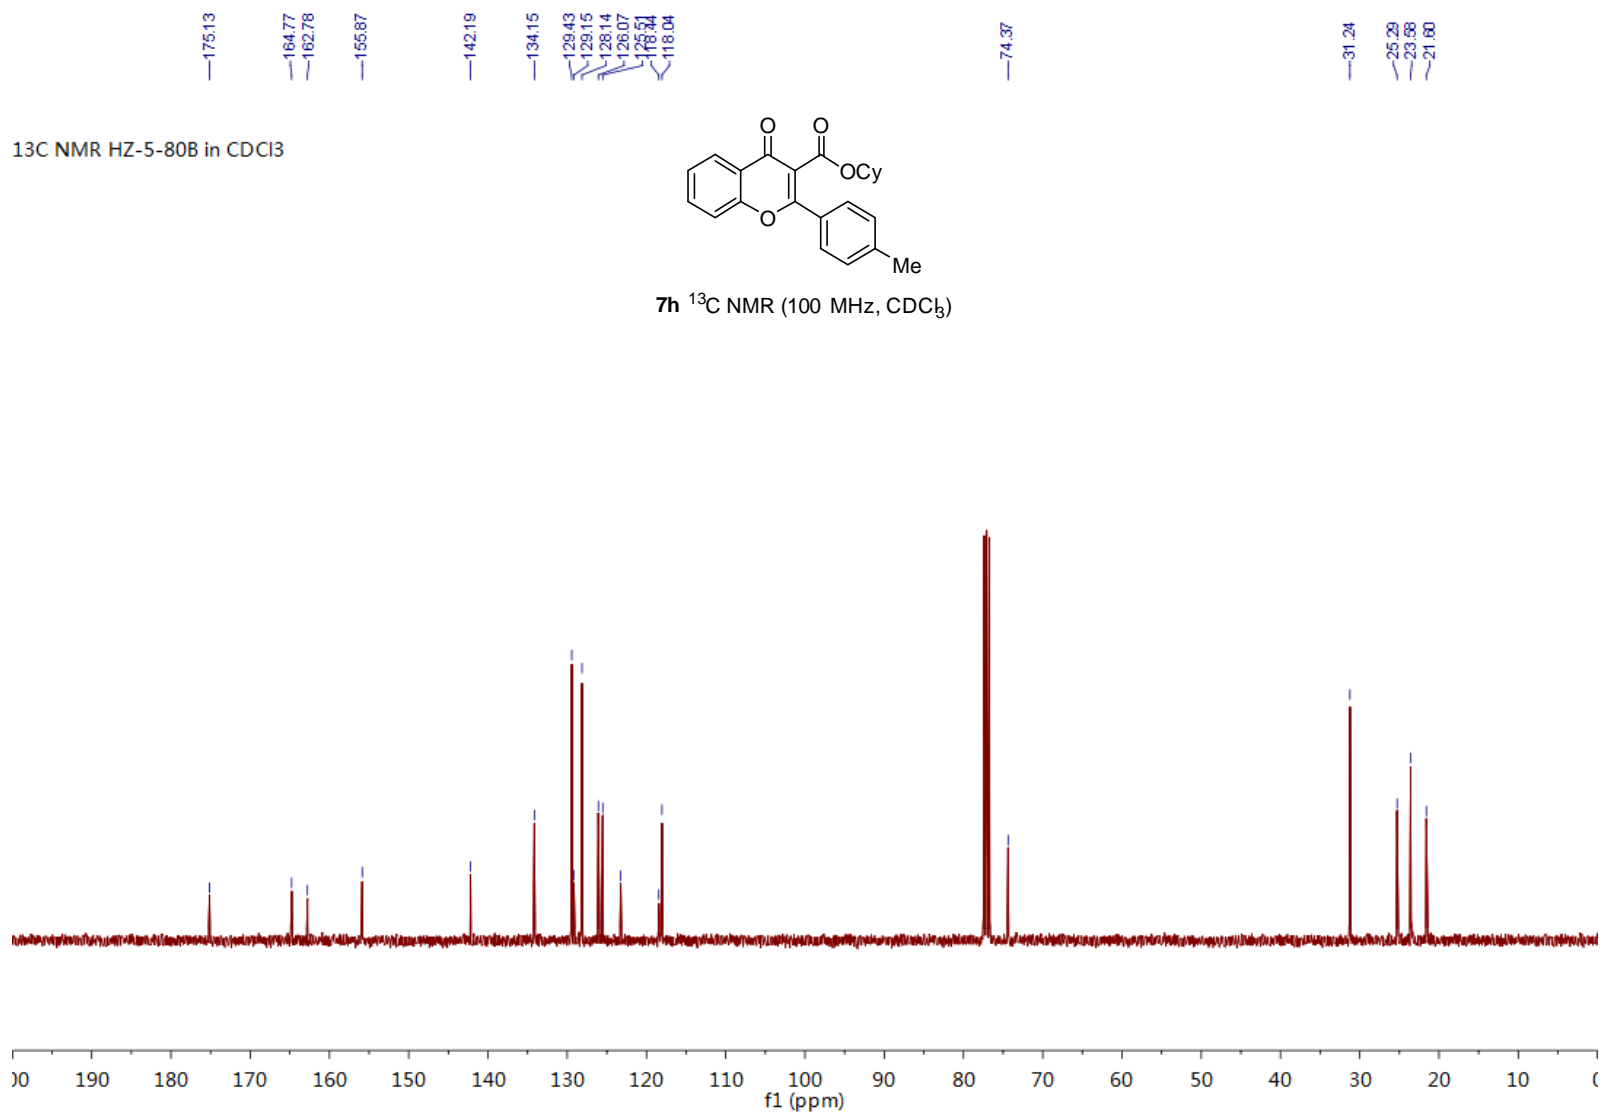



<sup>1</sup>H NMR HZ-5-80A in CDCl<sub>3</sub>

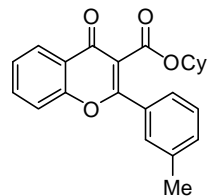

7i <sup>1</sup>H NMR (400 MHz, CDCl<sub>3</sub>)

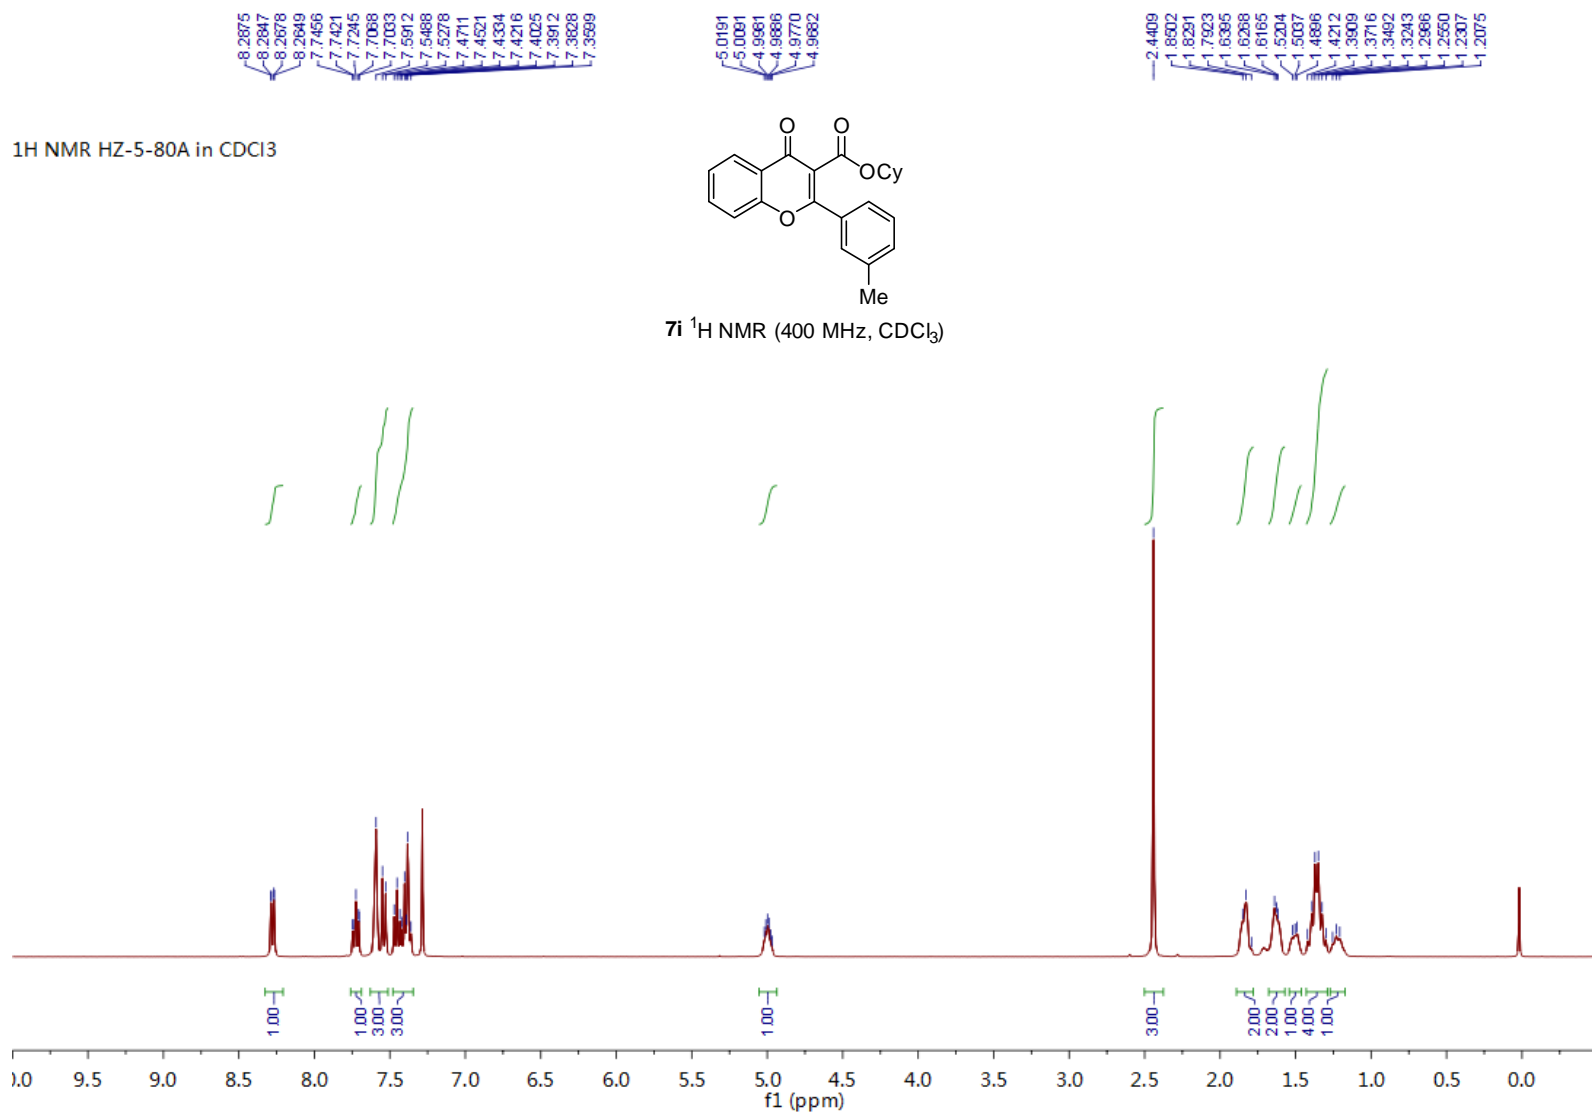

<sup>13</sup>C NMR HZ-5-80A in CDCl<sub>3</sub>

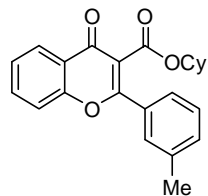

**7i** <sup>13</sup>C NMR (100 MHz, CDCl<sub>3</sub>)

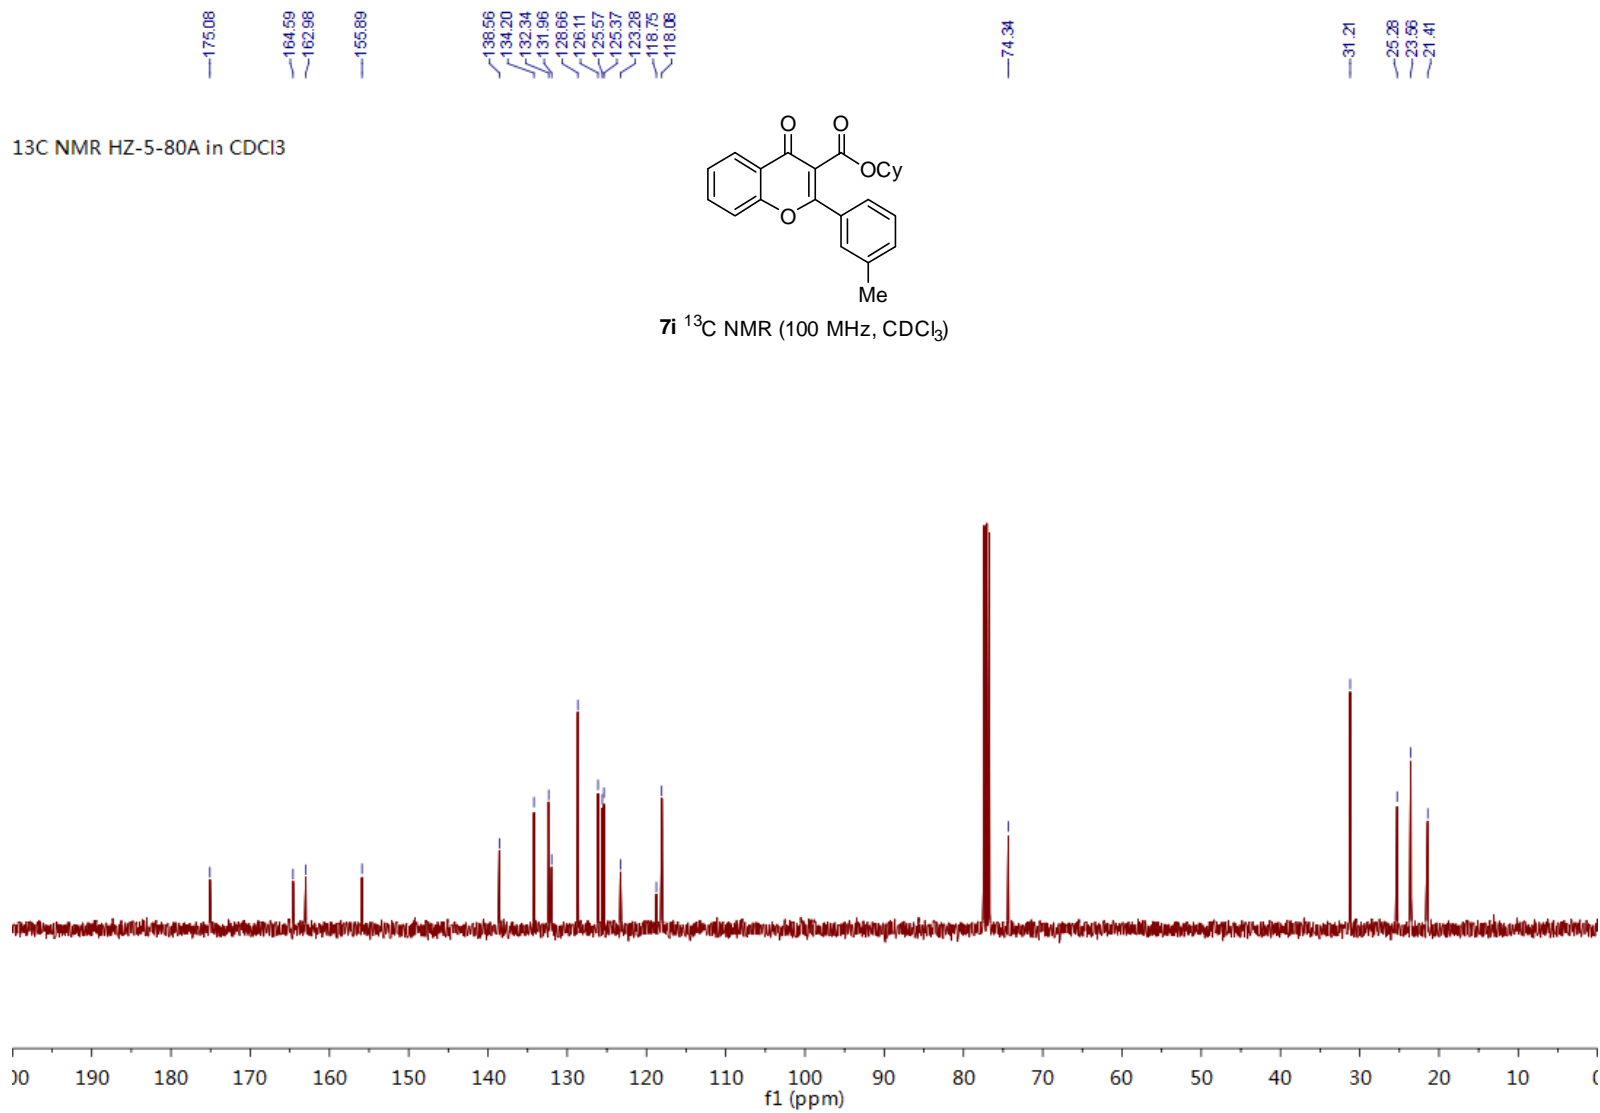

<sup>1</sup>H NMR HZ-5-87 in CDCl<sub>3</sub>

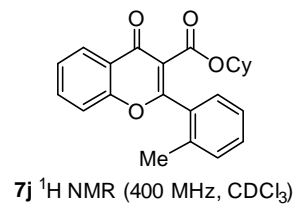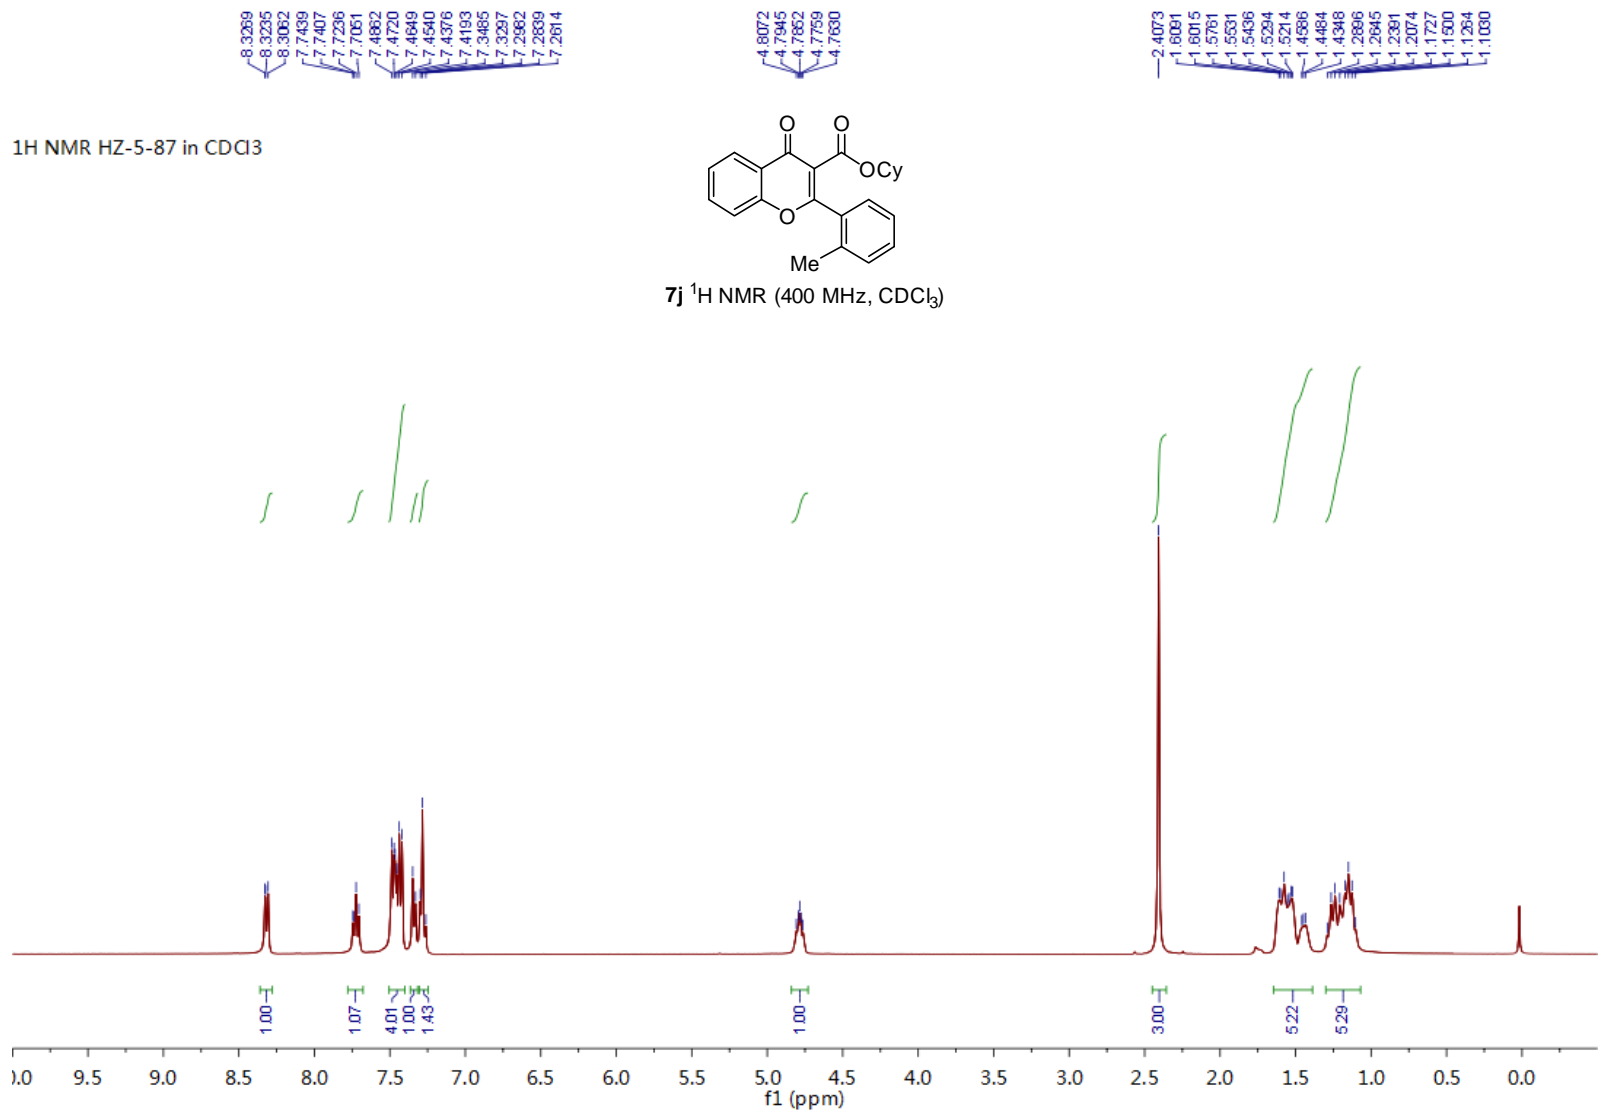

<sup>13</sup>C NMR HZ-5-87 in CDCl<sub>3</sub>

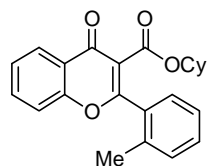

**7j** <sup>13</sup>C NMR (100 MHz, CDCl<sub>3</sub>)

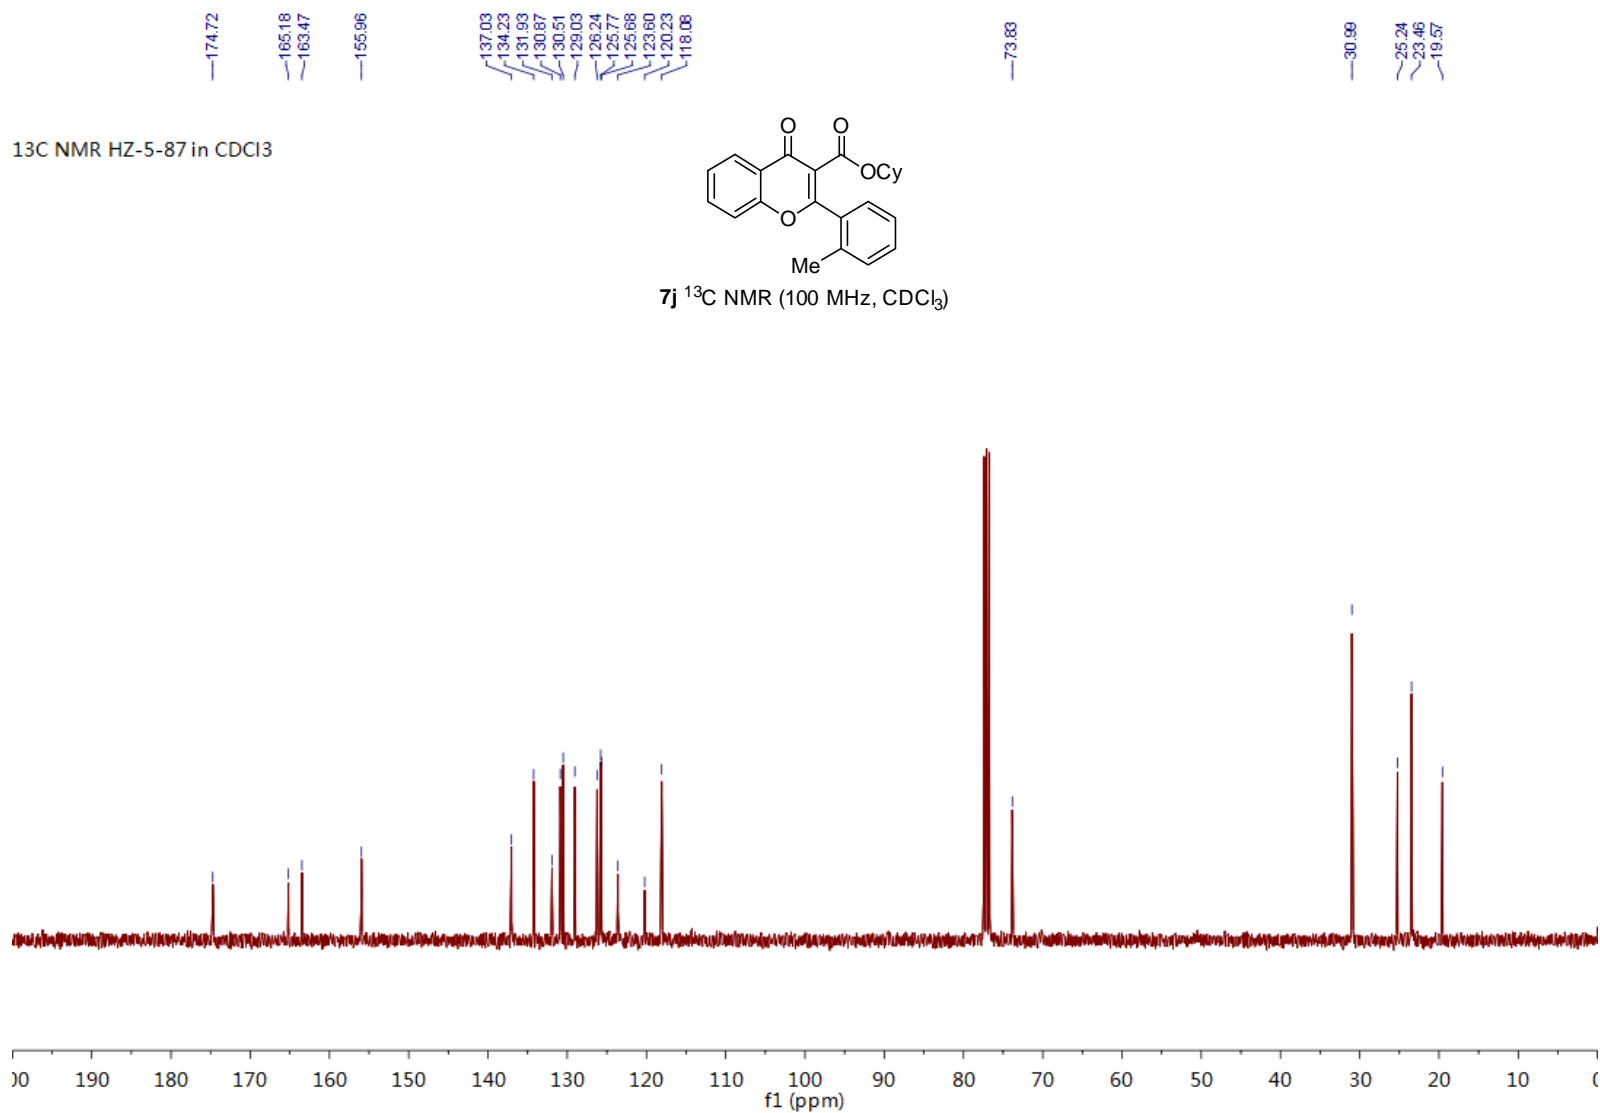

<sup>1</sup>H NMR HZ-5-78 in CDCl<sub>3</sub>

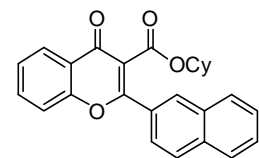

**7k** <sup>1</sup>H NMR (400 MHz, CDCl<sub>3</sub>)

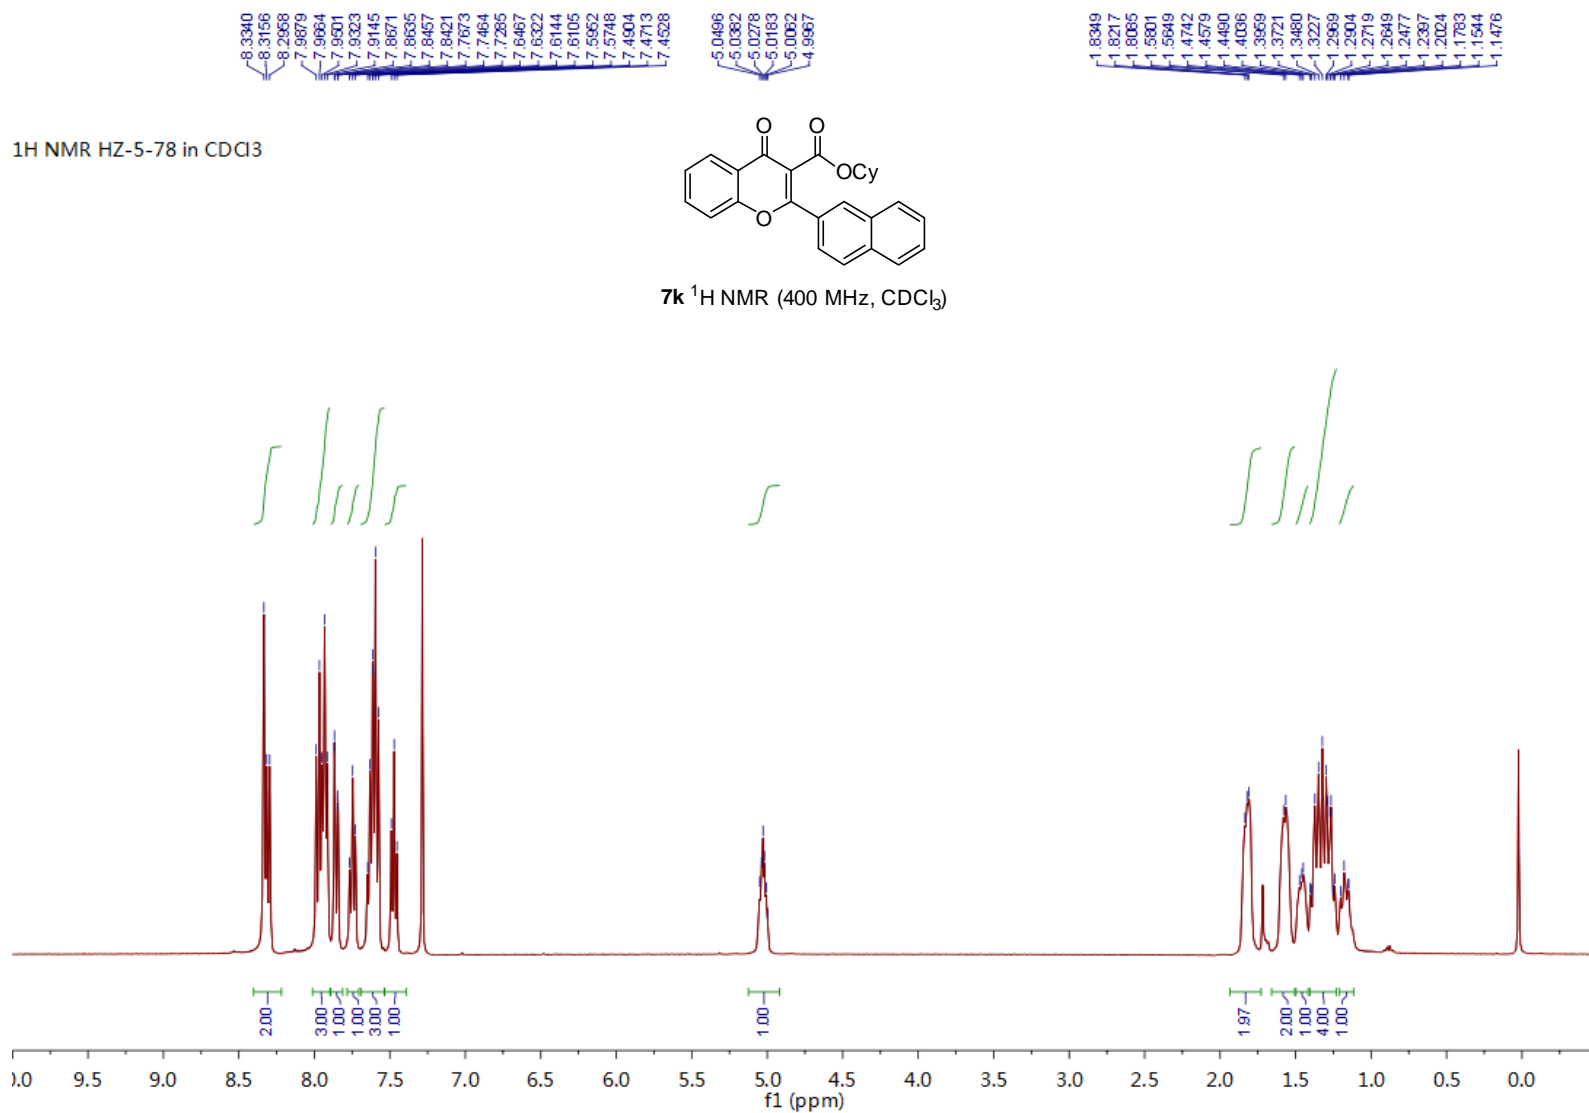

$^{13}\text{C}$  NMR HZ-5-78in  $\text{CDCl}_3$

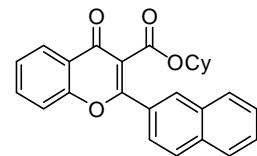

**7k**  $^{13}\text{C}$  NMR (100 MHz,  $\text{CDCl}_3$ )

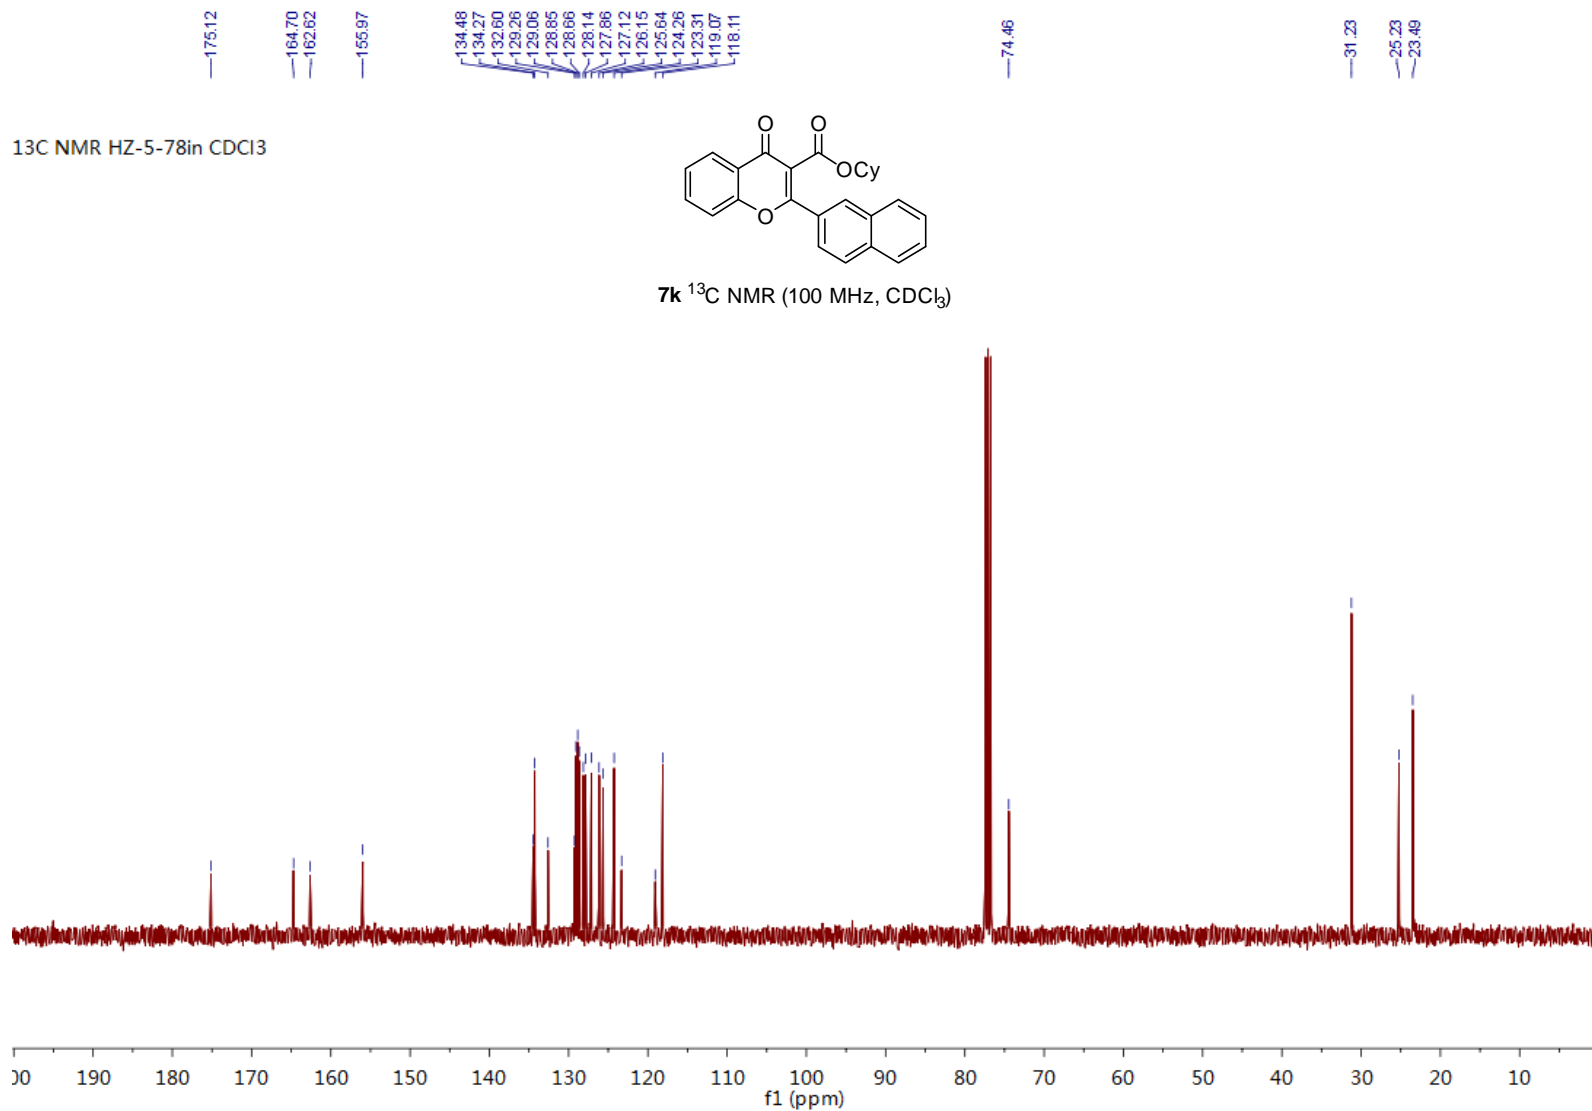

<sup>1</sup>H NMR HZ-5-91 in CDCl<sub>3</sub>

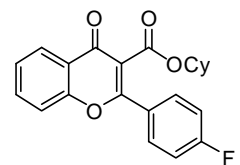

71 <sup>1</sup>H NMR (400 MHz, CDCl<sub>3</sub>)

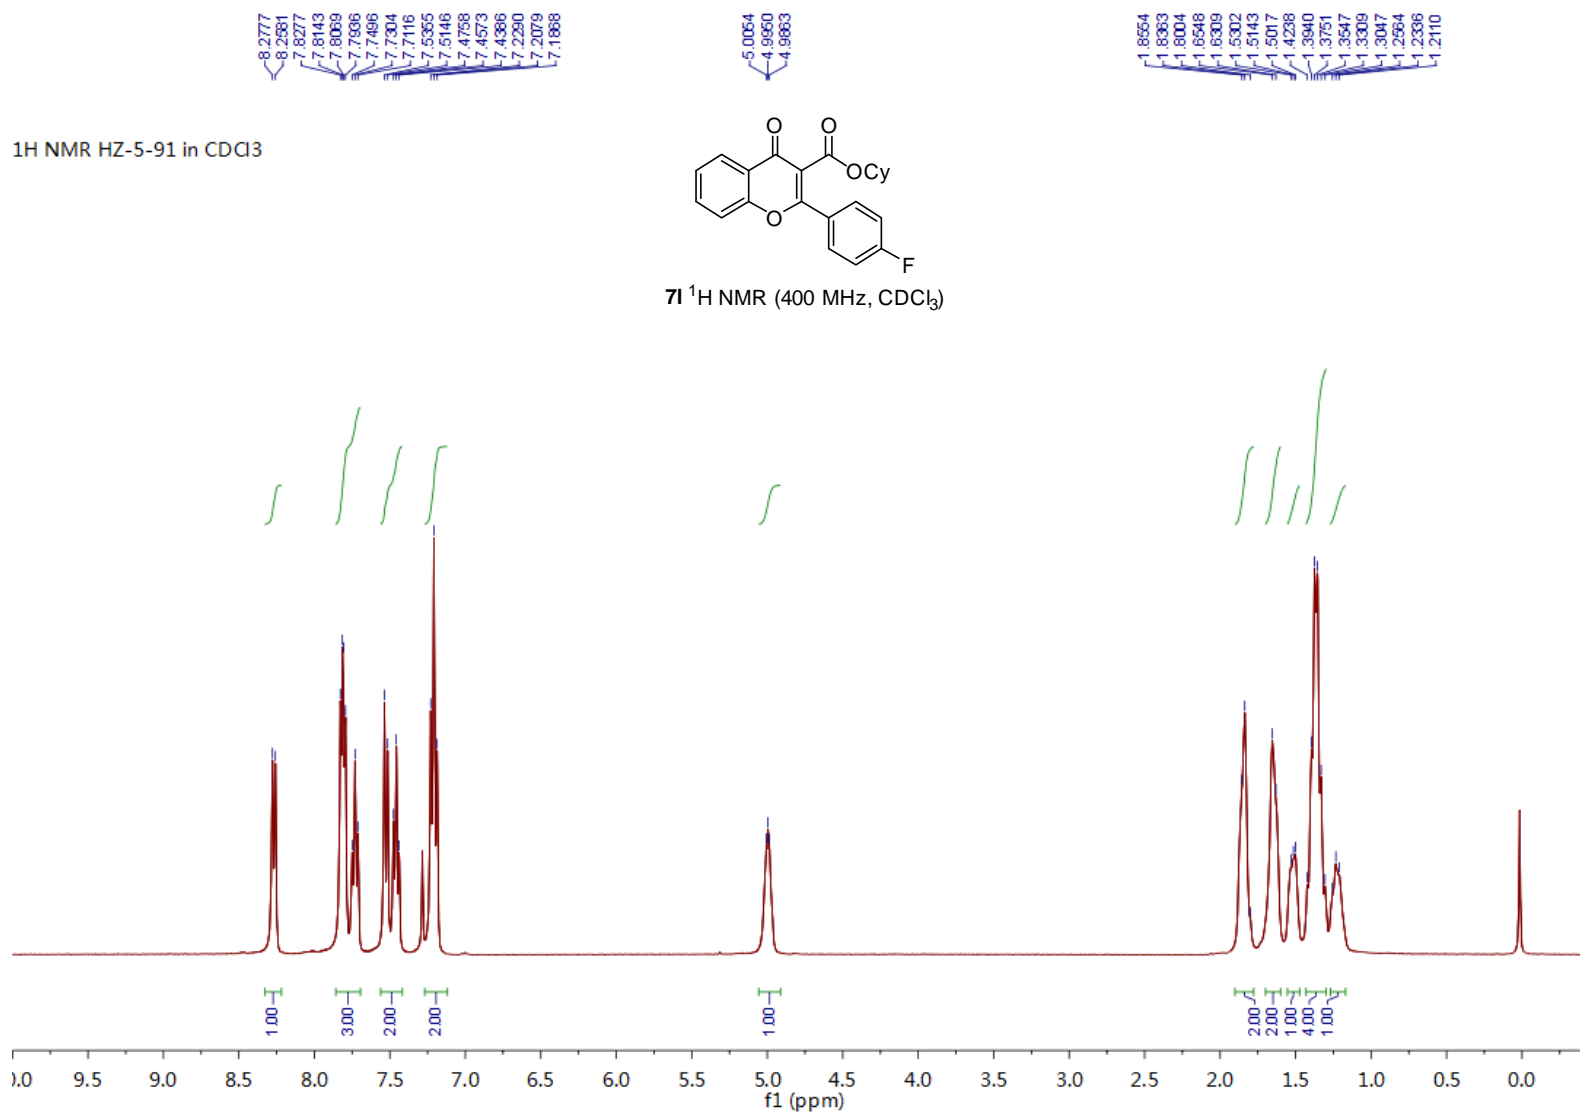

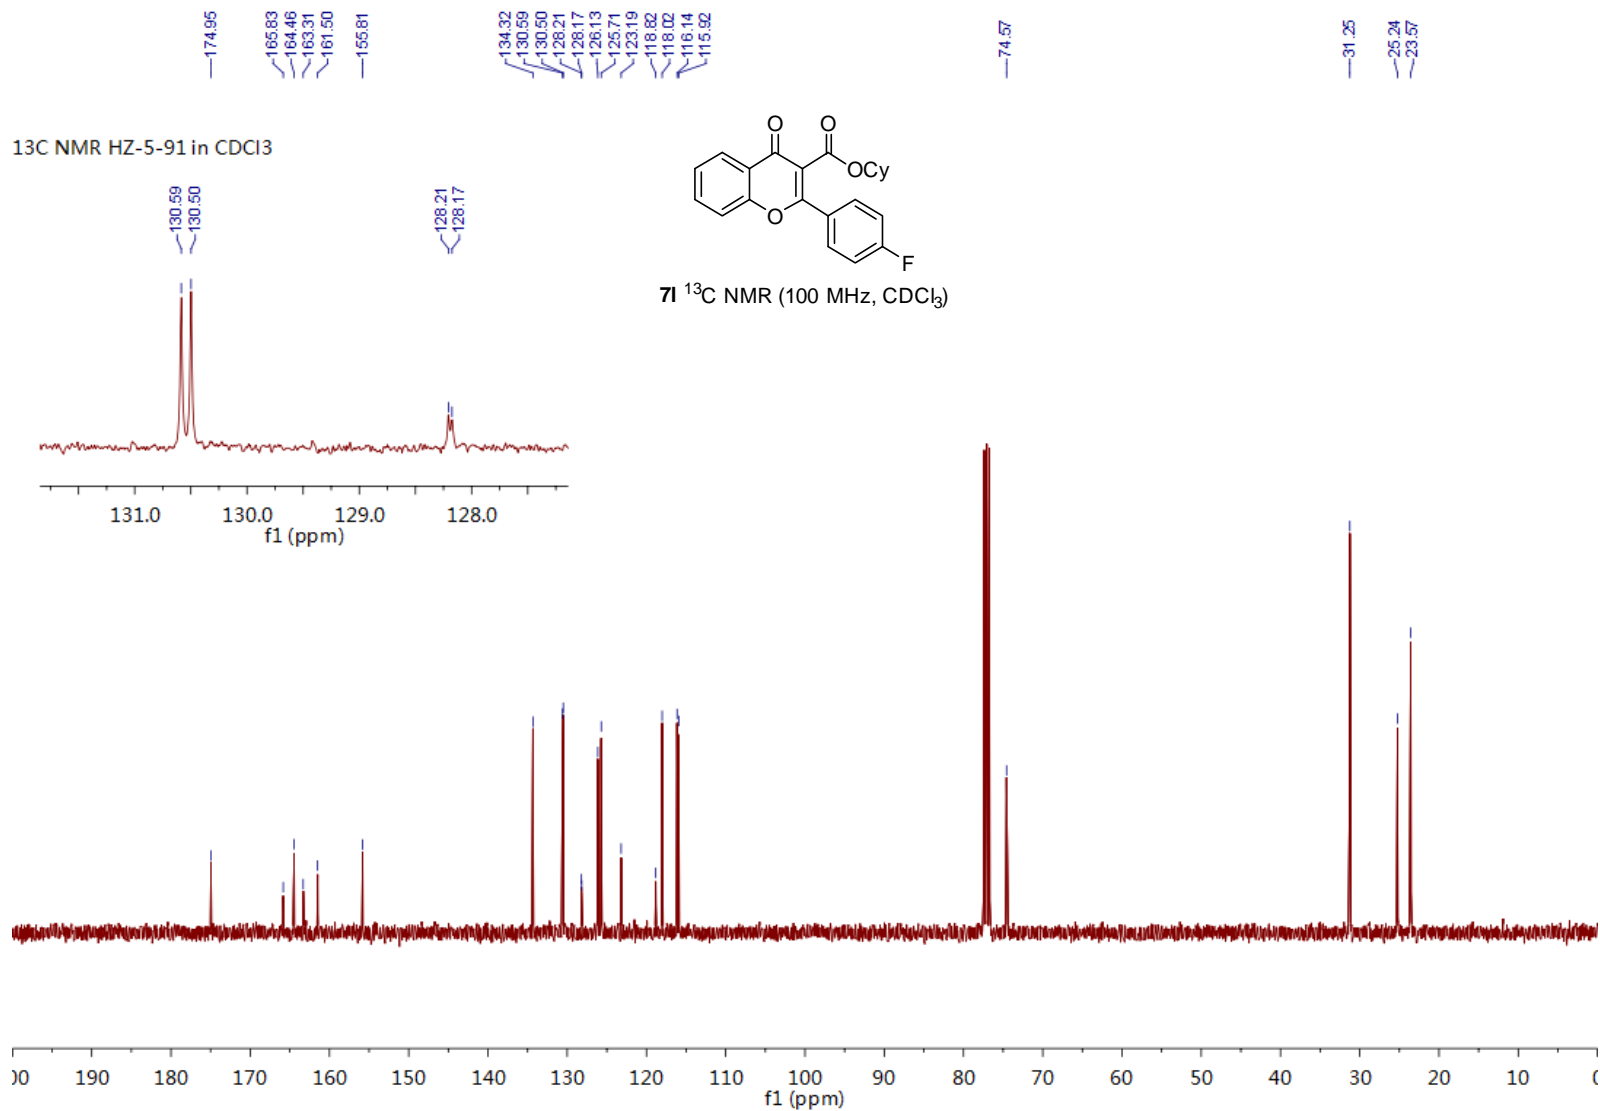



19F NMR HZ-5-91 in CDCl3

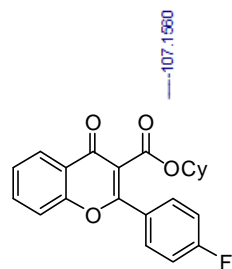

71 <sup>19</sup>F NMR (376 MHz, CDCl<sub>3</sub>)

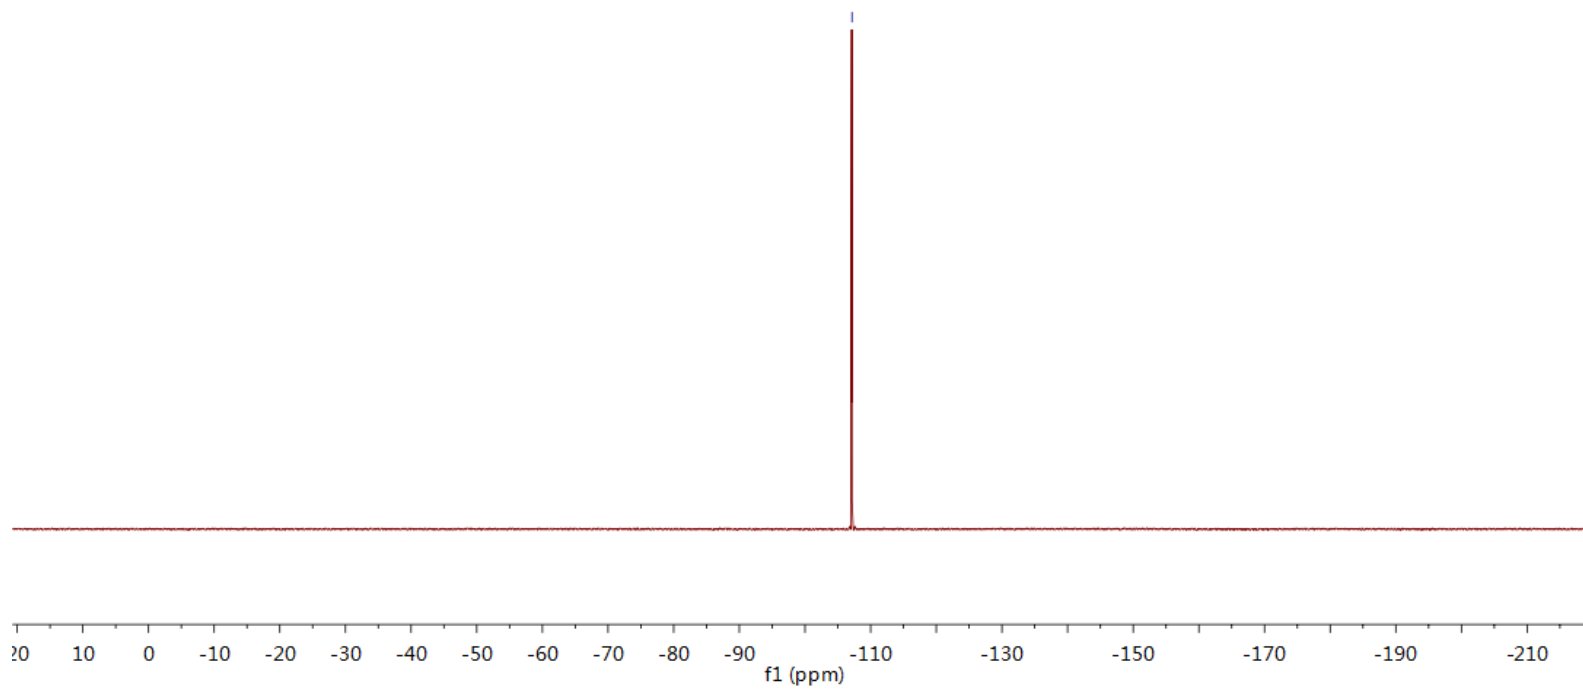

<sup>1</sup>H NMR HZ-5-96 in CDCl<sub>3</sub>

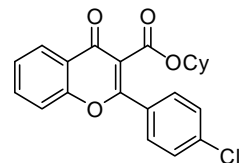

7m <sup>1</sup>H NMR (400 MHz, CDCl<sub>3</sub>)

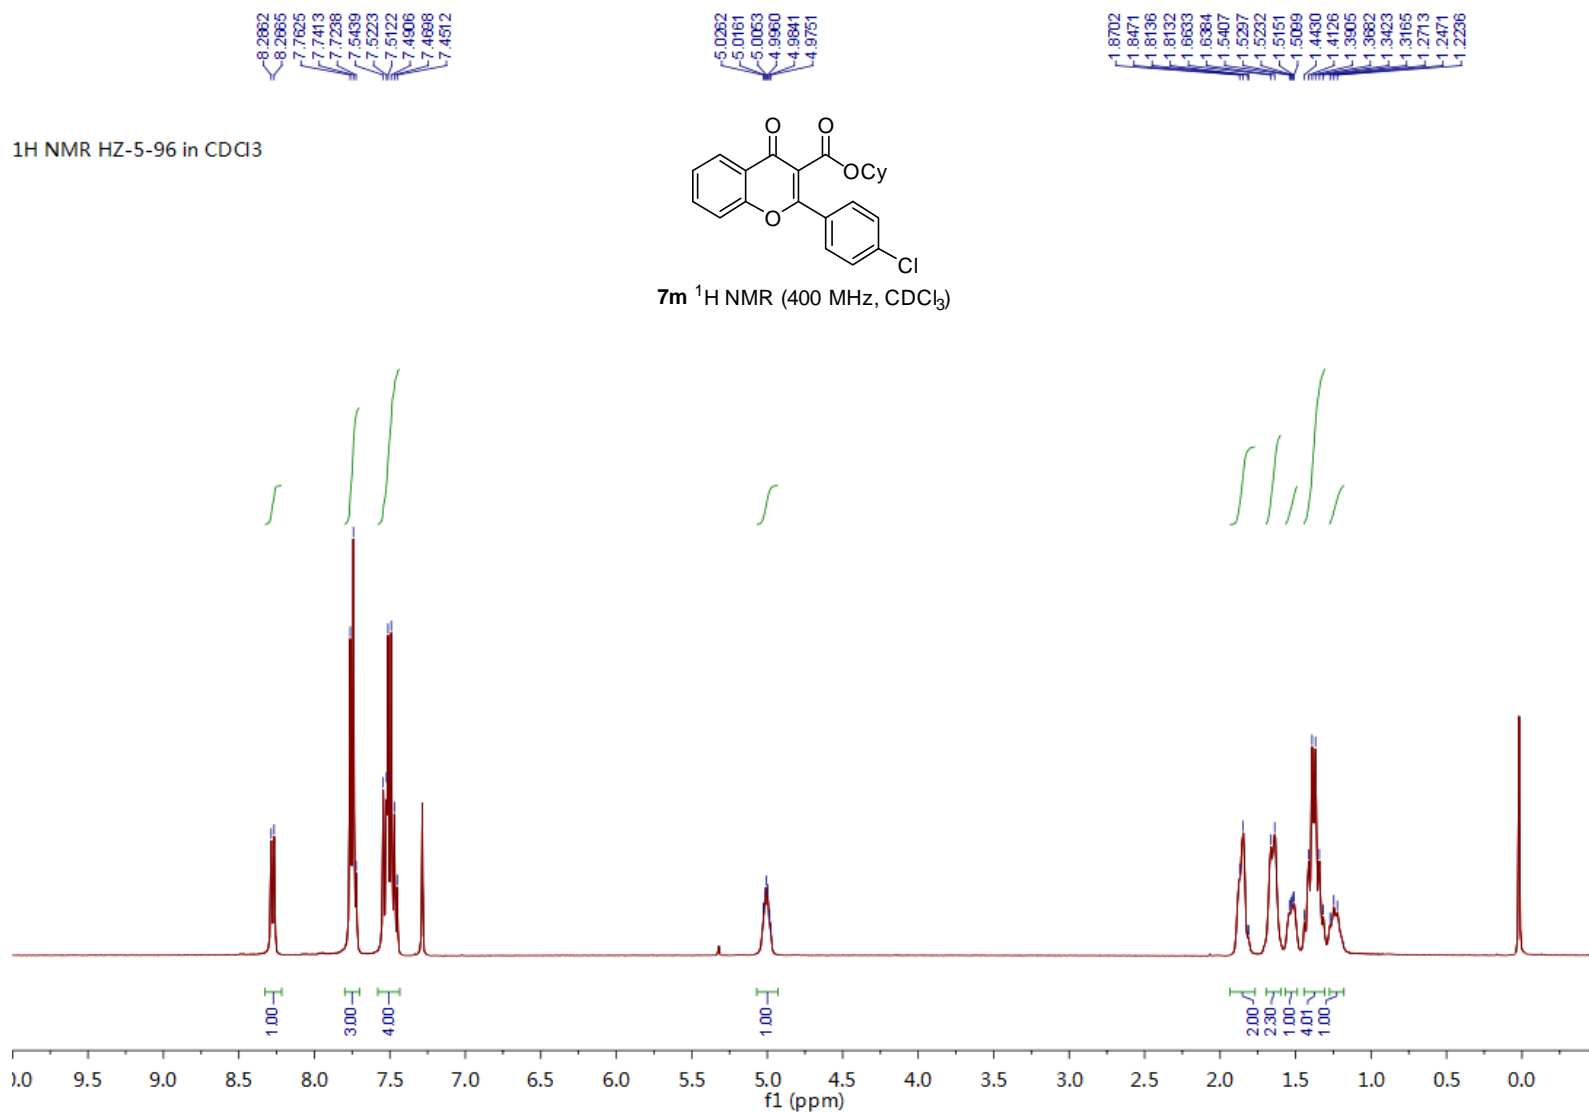

<sup>13</sup>C NMR HZ-5-96 in CDCl<sub>3</sub>

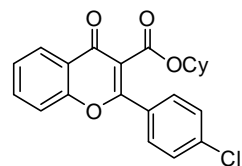

**7m** <sup>13</sup>C NMR (100 MHz, CDCl<sub>3</sub>)

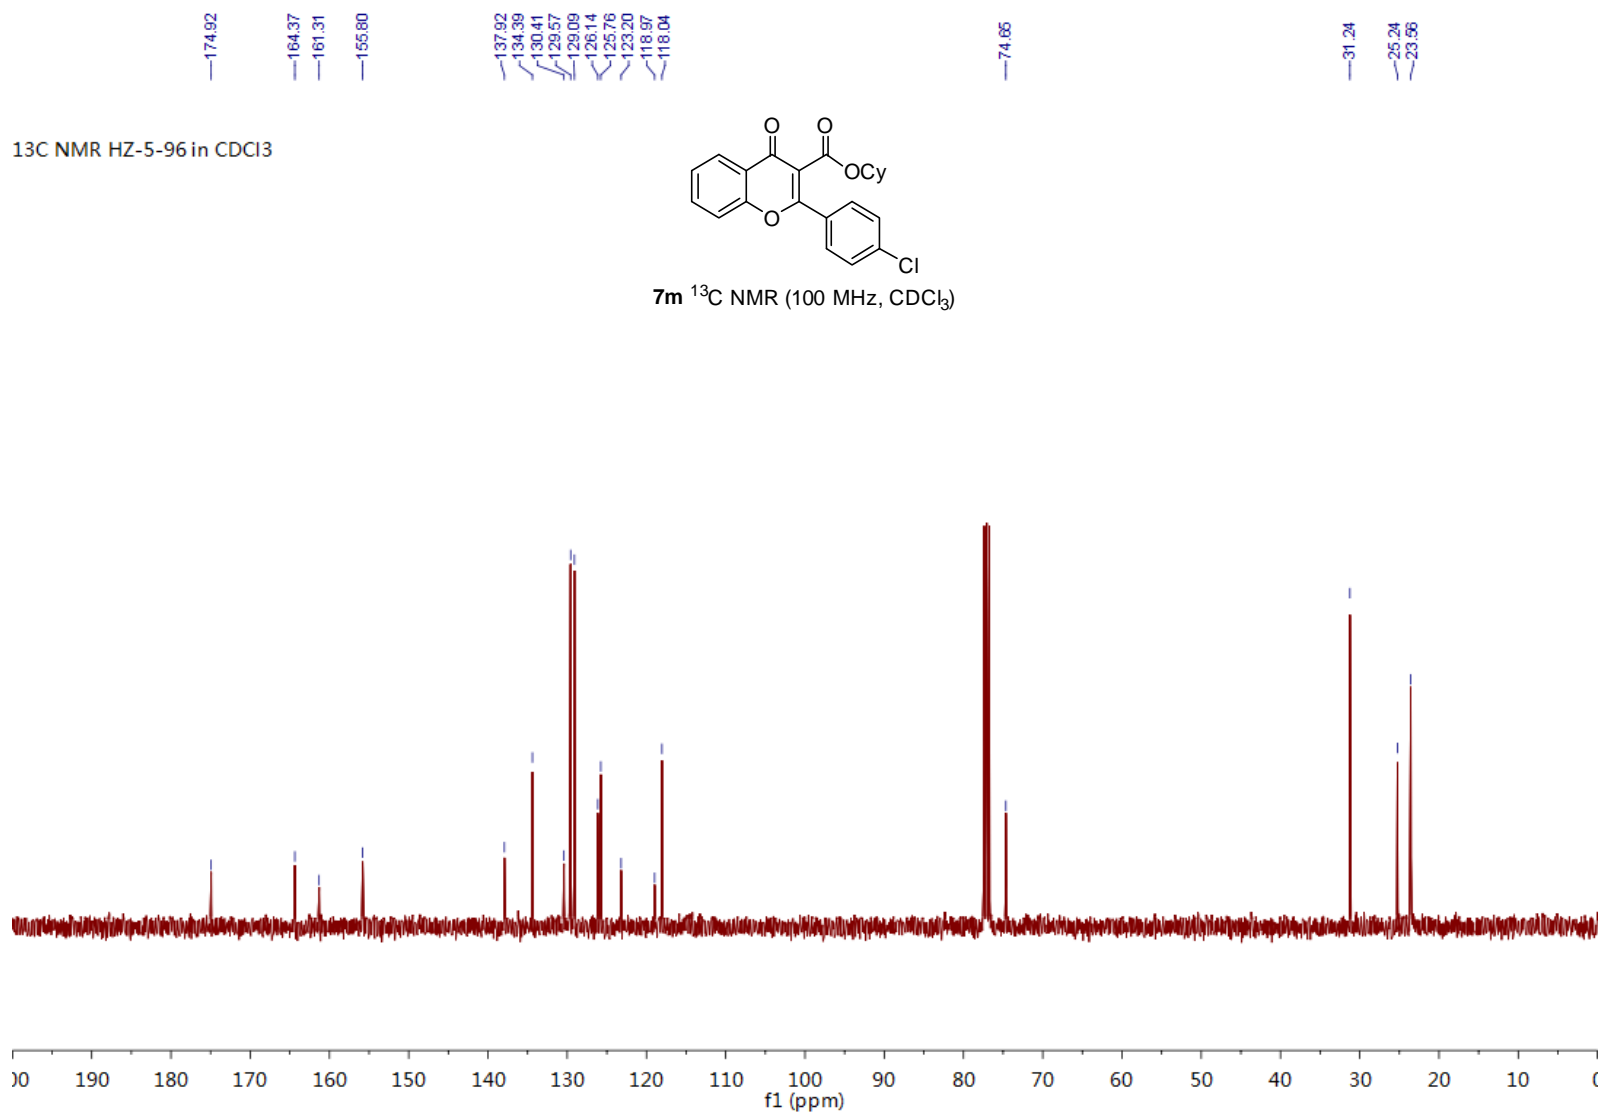

<sup>1</sup>H NMR HZ-5-95 in CDCl<sub>3</sub>

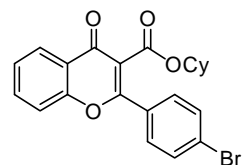

**7n** <sup>1</sup>H NMR (400 MHz, CDCl<sub>3</sub>)

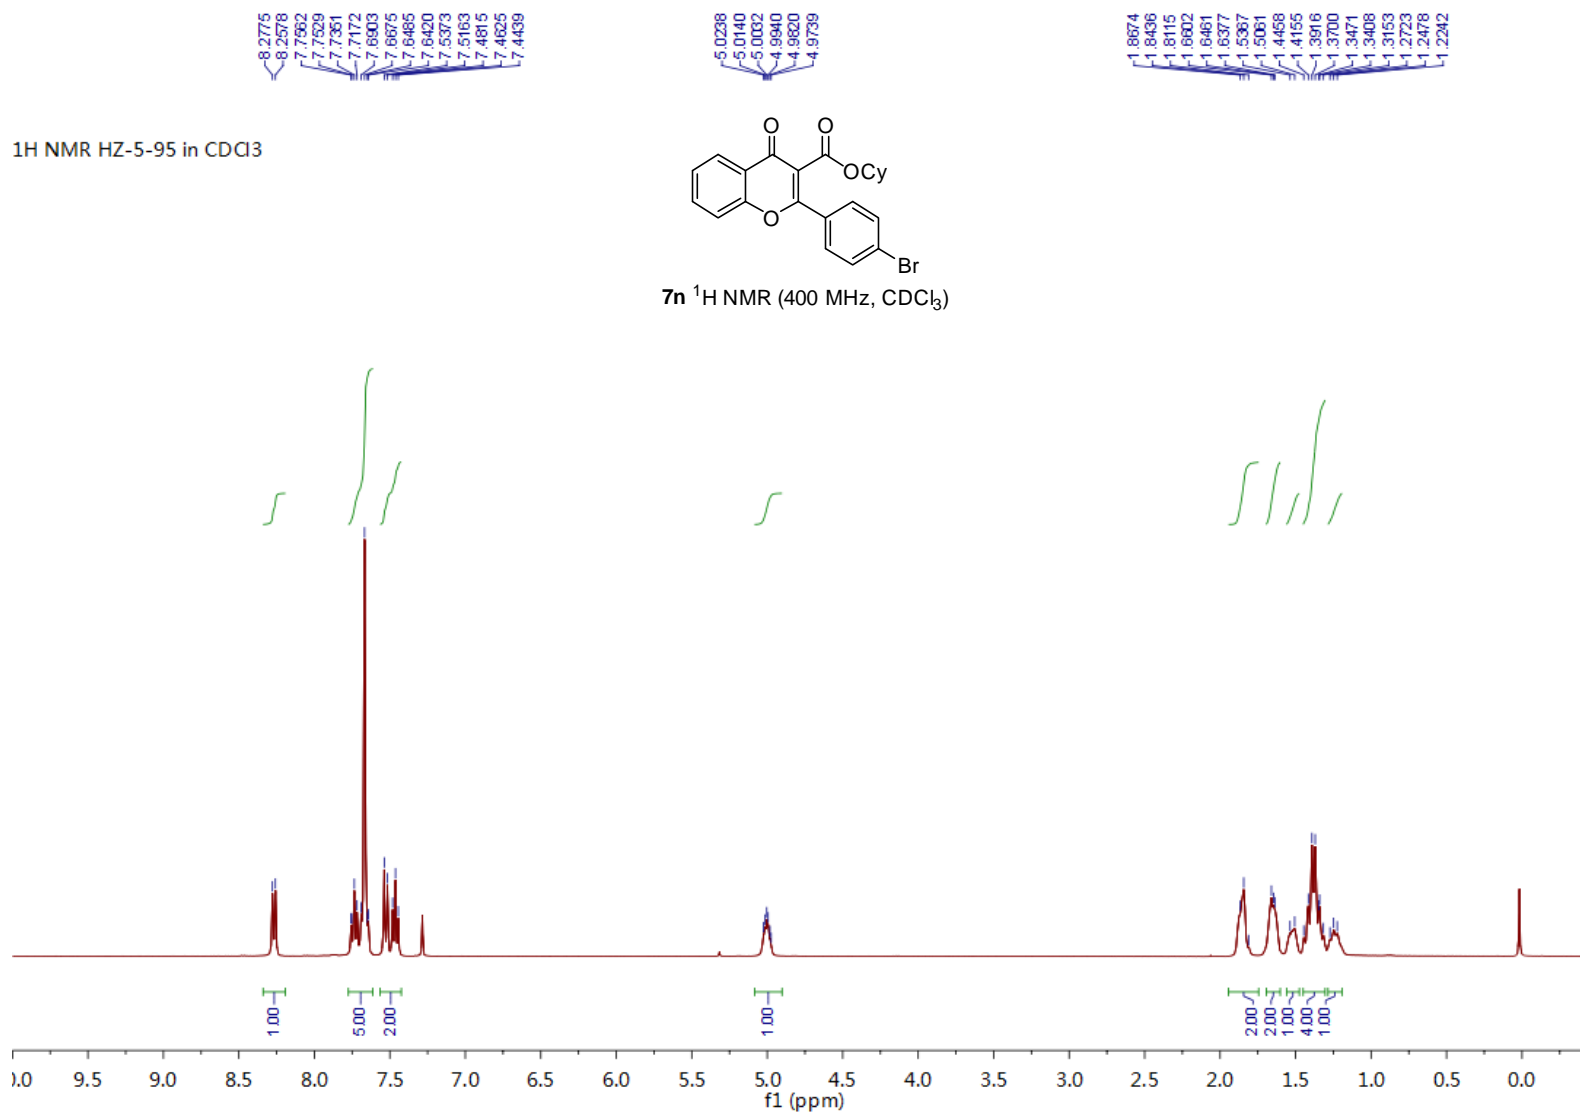

<sup>13</sup>C NMR HZ-5-95 in CDCl<sub>3</sub>

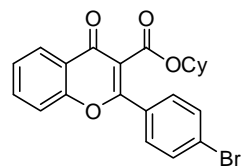

**7n** <sup>13</sup>C NMR (100 MHz, CDCl<sub>3</sub>)

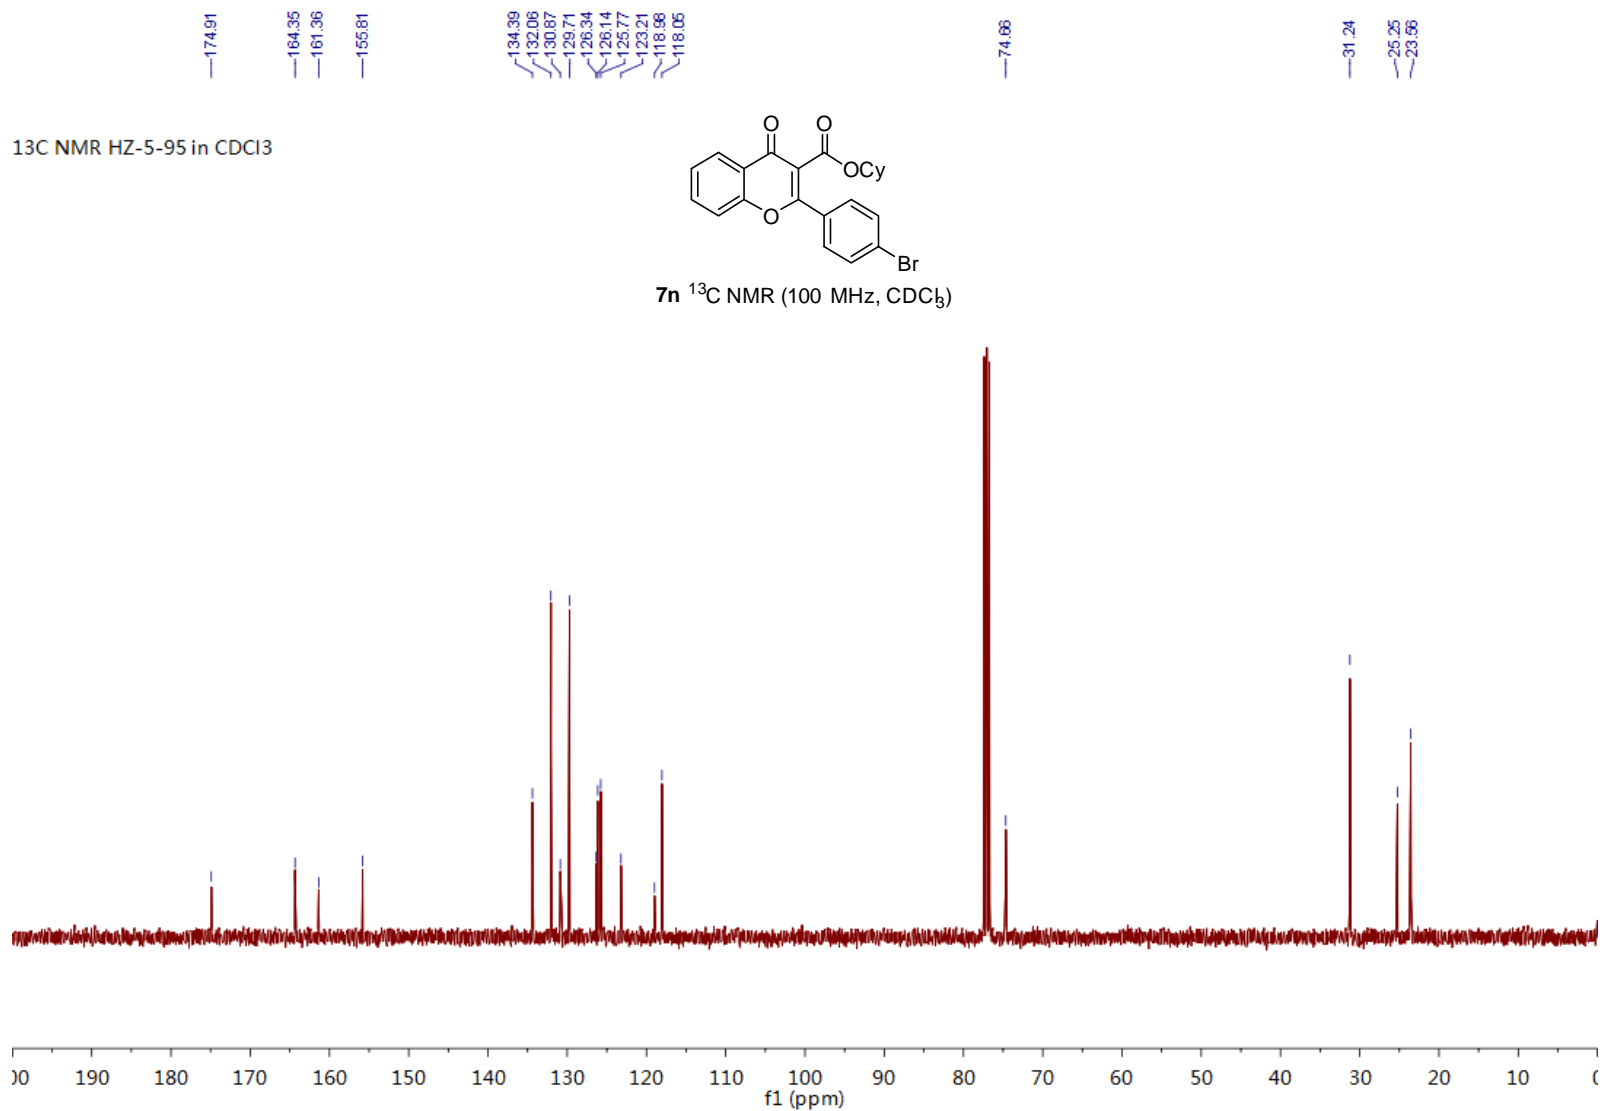

<sup>1</sup>H NMR HZ-5-101A in CDCl<sub>3</sub>

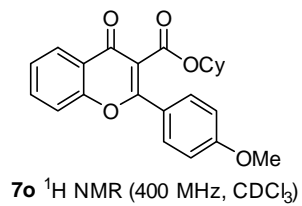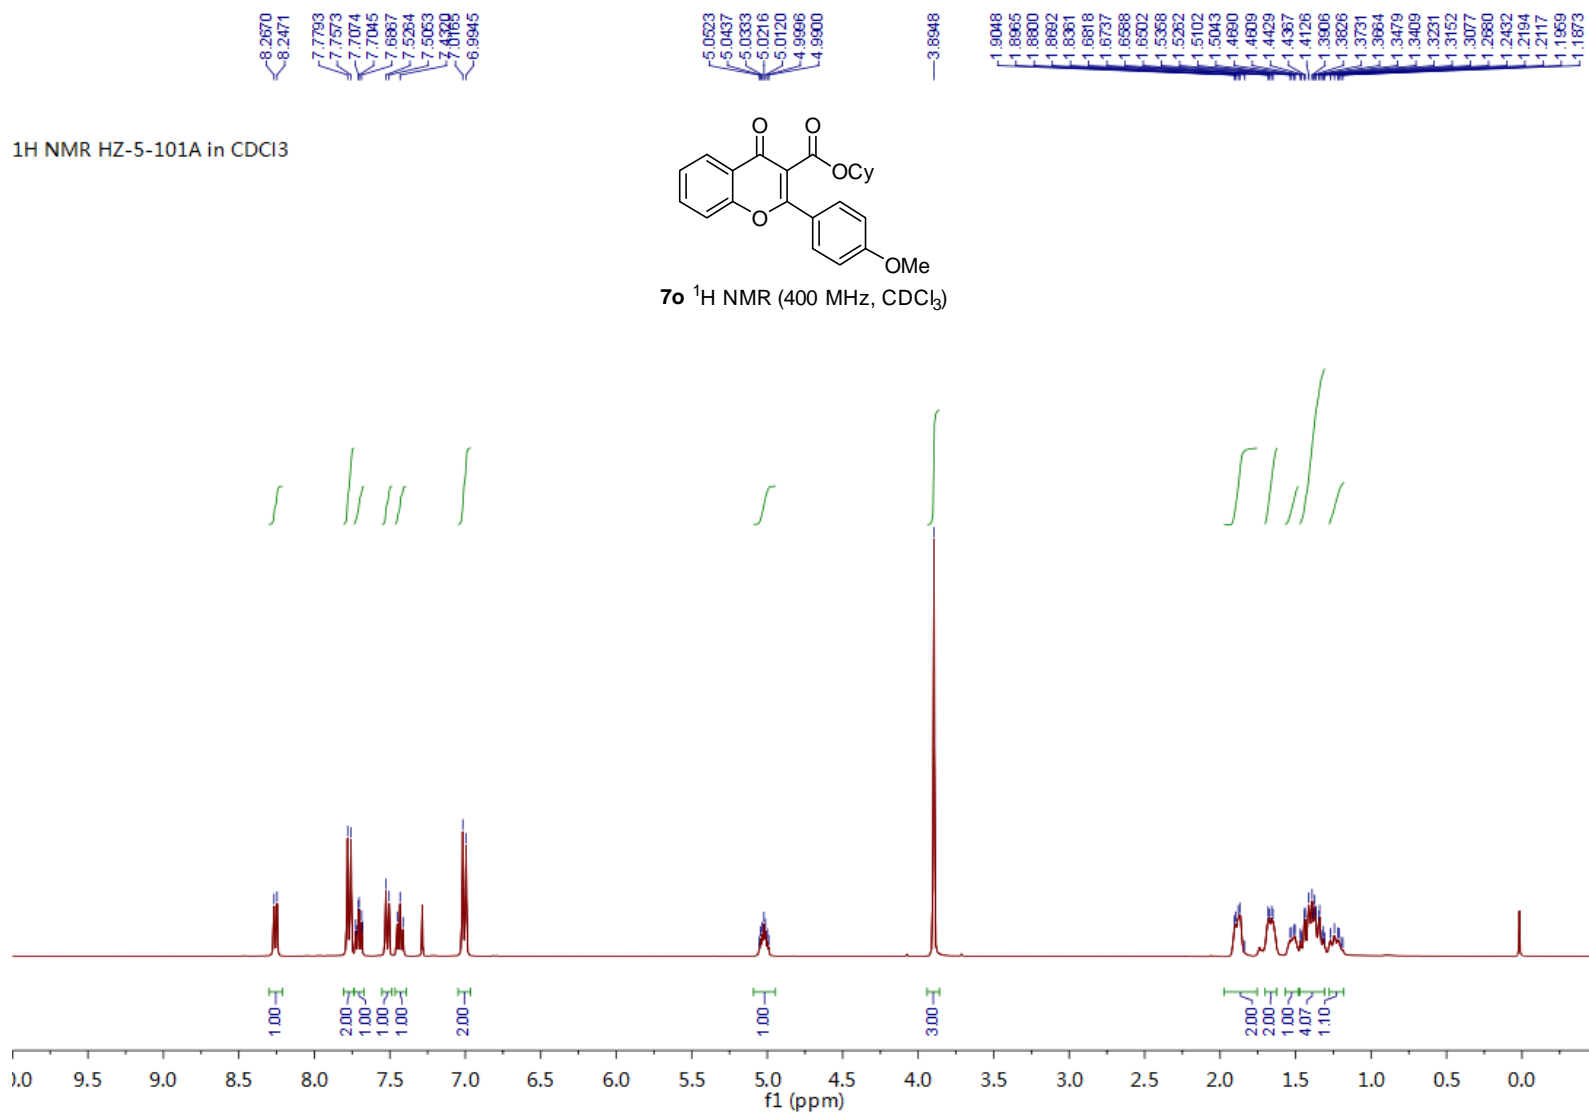

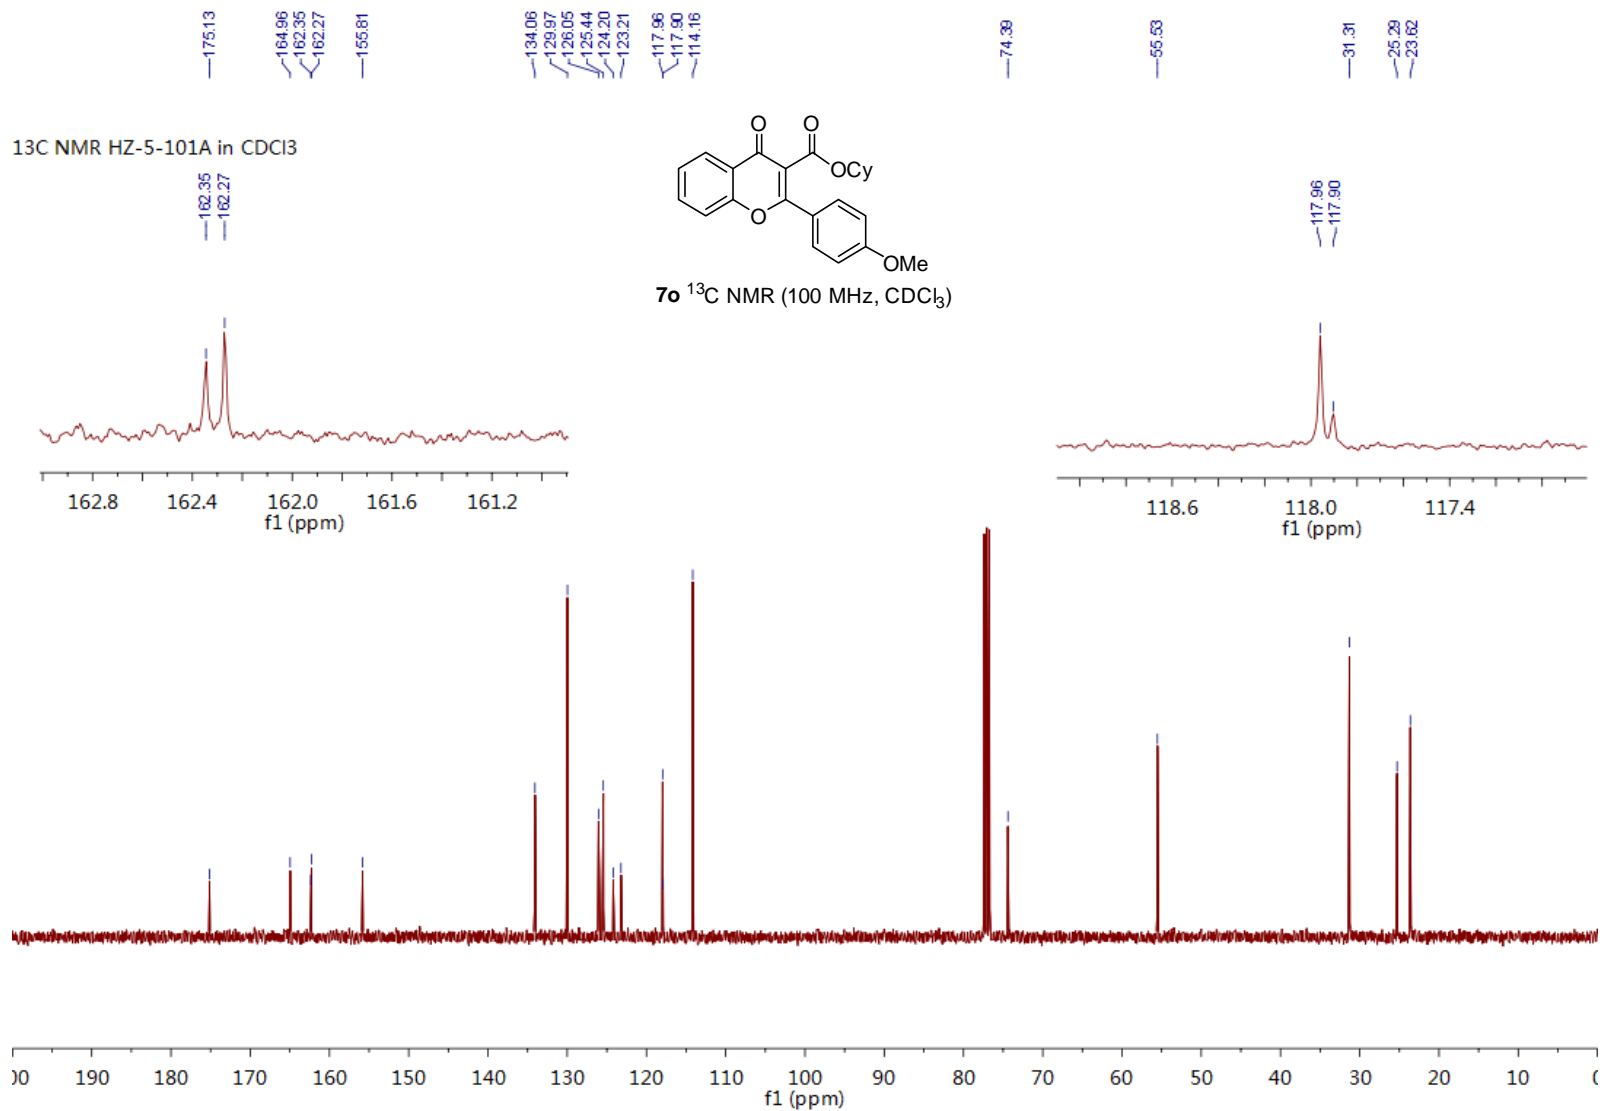

<sup>1</sup>H NMR HZ-5-85 in CDCl<sub>3</sub>

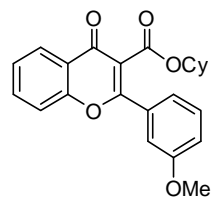

**7p** <sup>1</sup>H NMR (400 MHz, CDCl<sub>3</sub>)

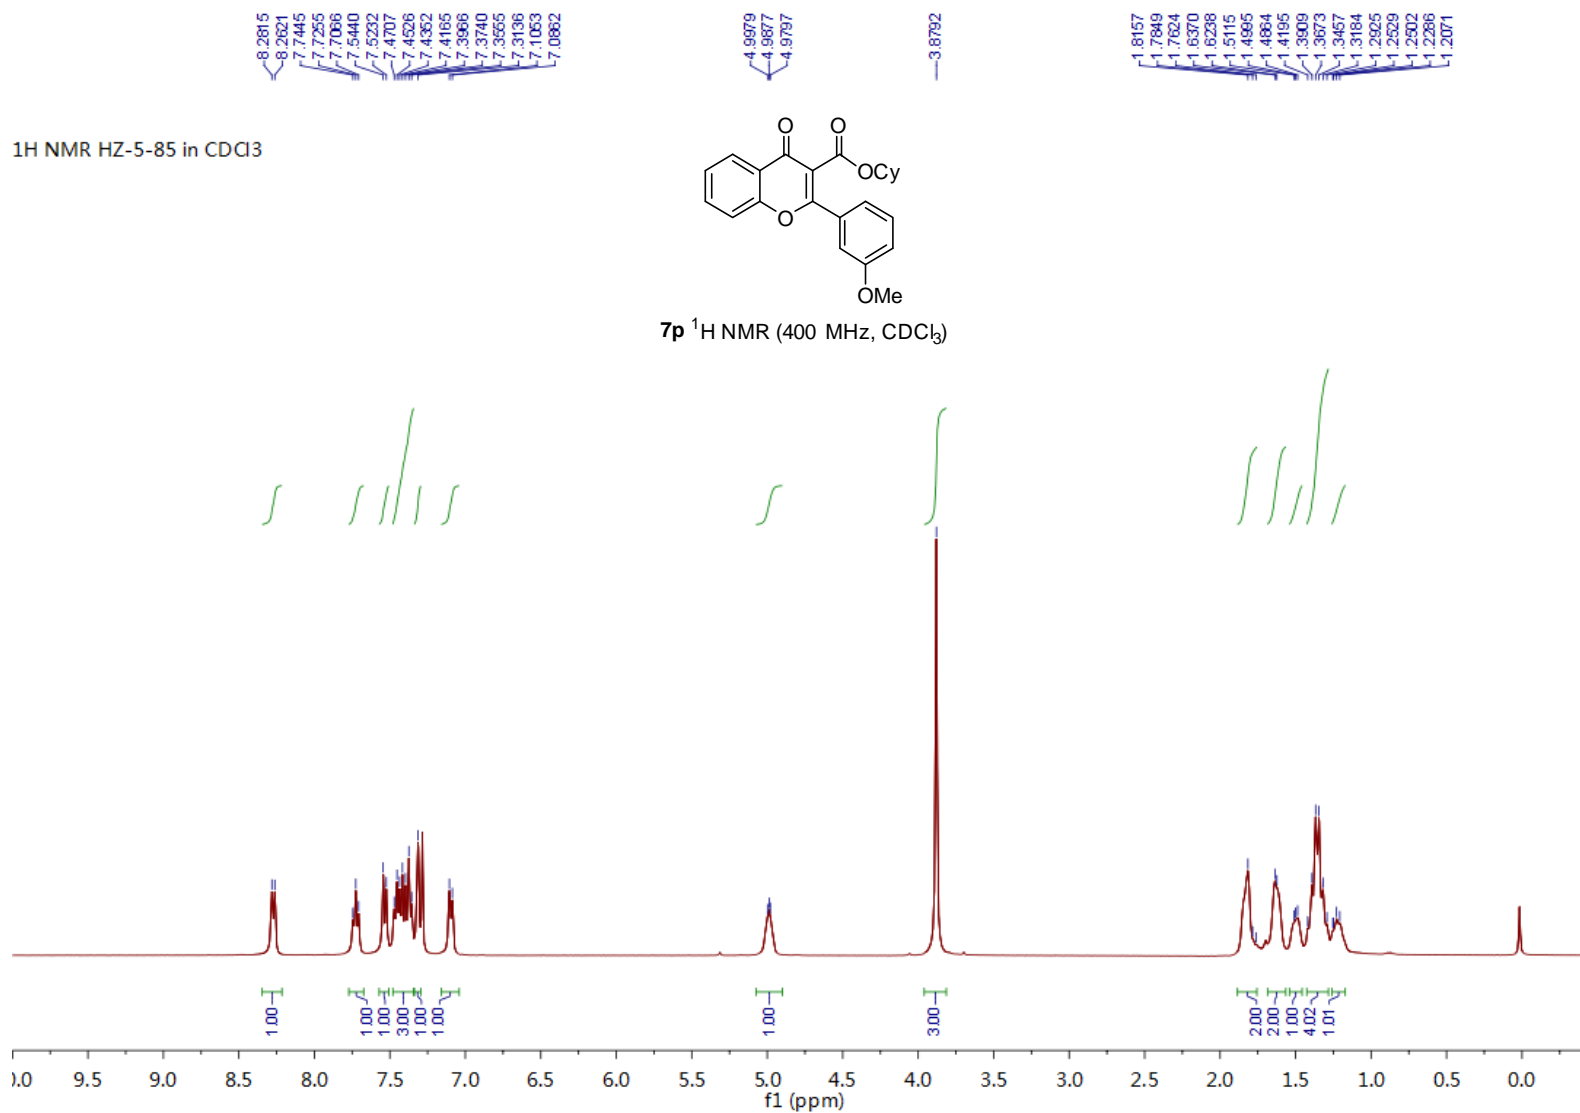



<sup>13</sup>C NMR HZ-5-85 in CDCl<sub>3</sub>

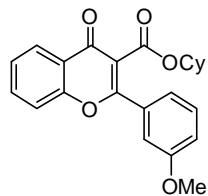

7p <sup>13</sup>C NMR (100 MHz, CDCl<sub>3</sub>)

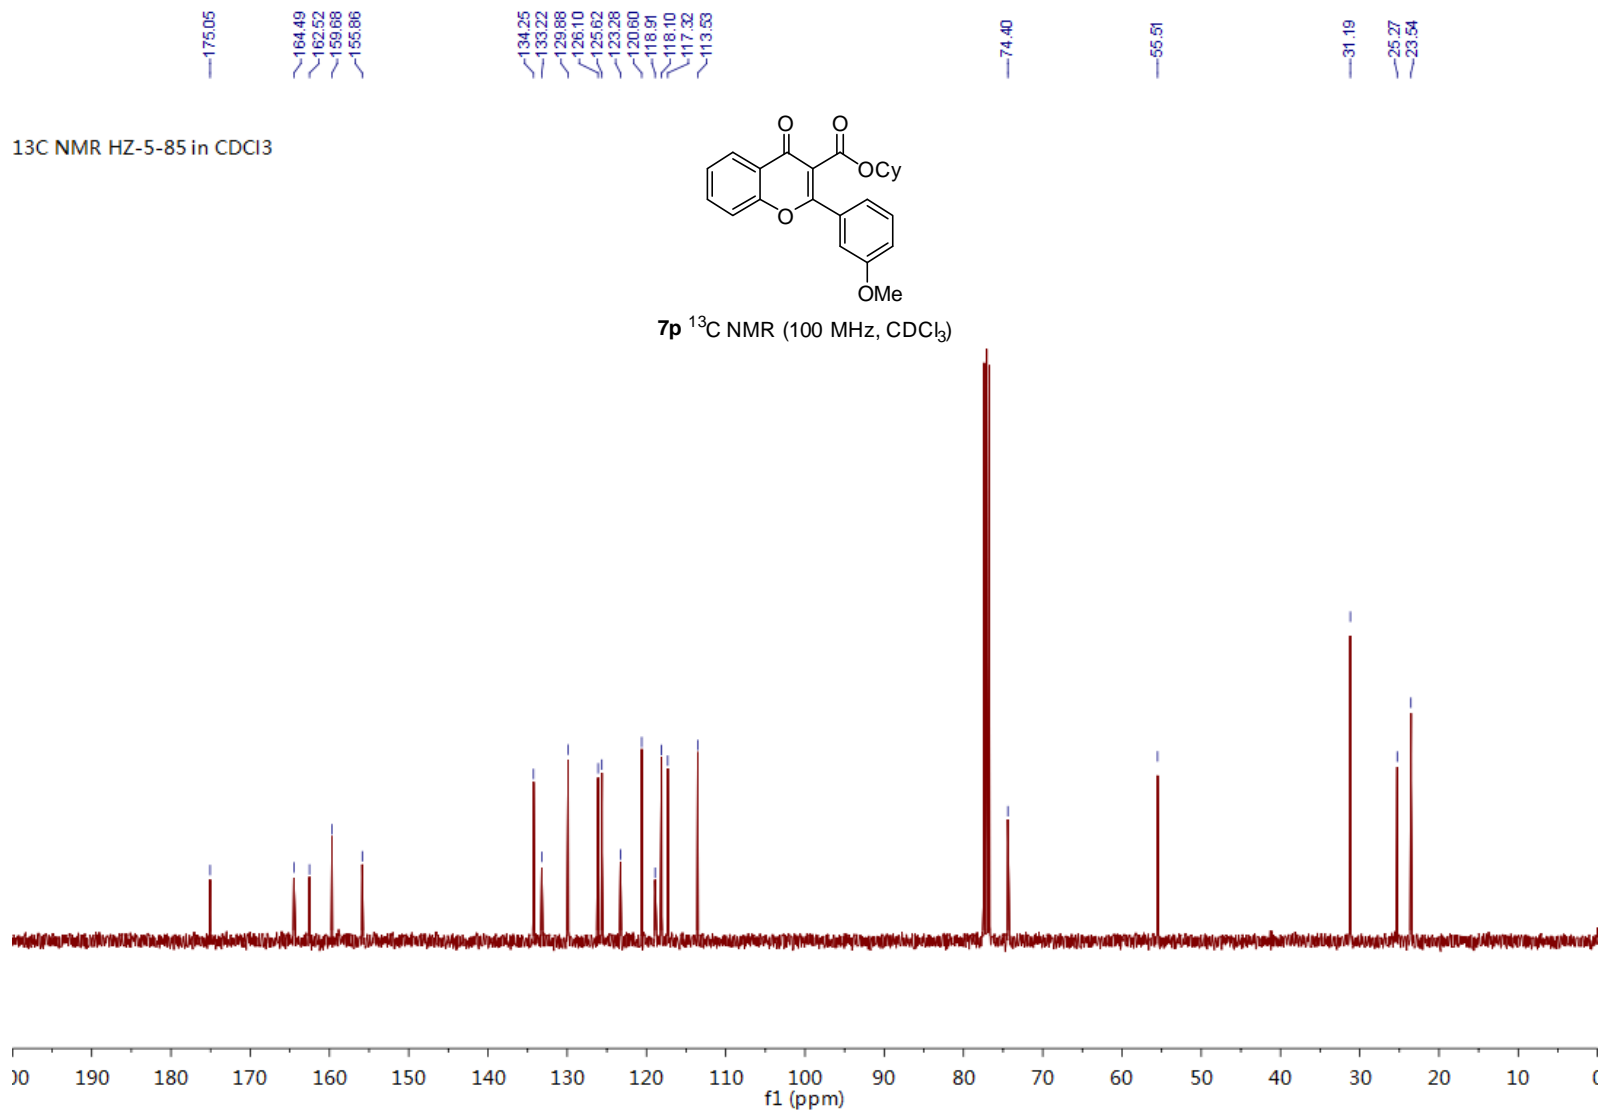

<sup>1</sup>H NMR HZ-6-10A in CDCl<sub>3</sub>

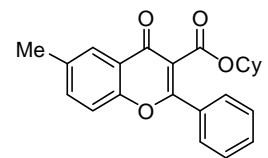

7q <sup>1</sup>H NMR (400 MHz, CDCl<sub>3</sub>)

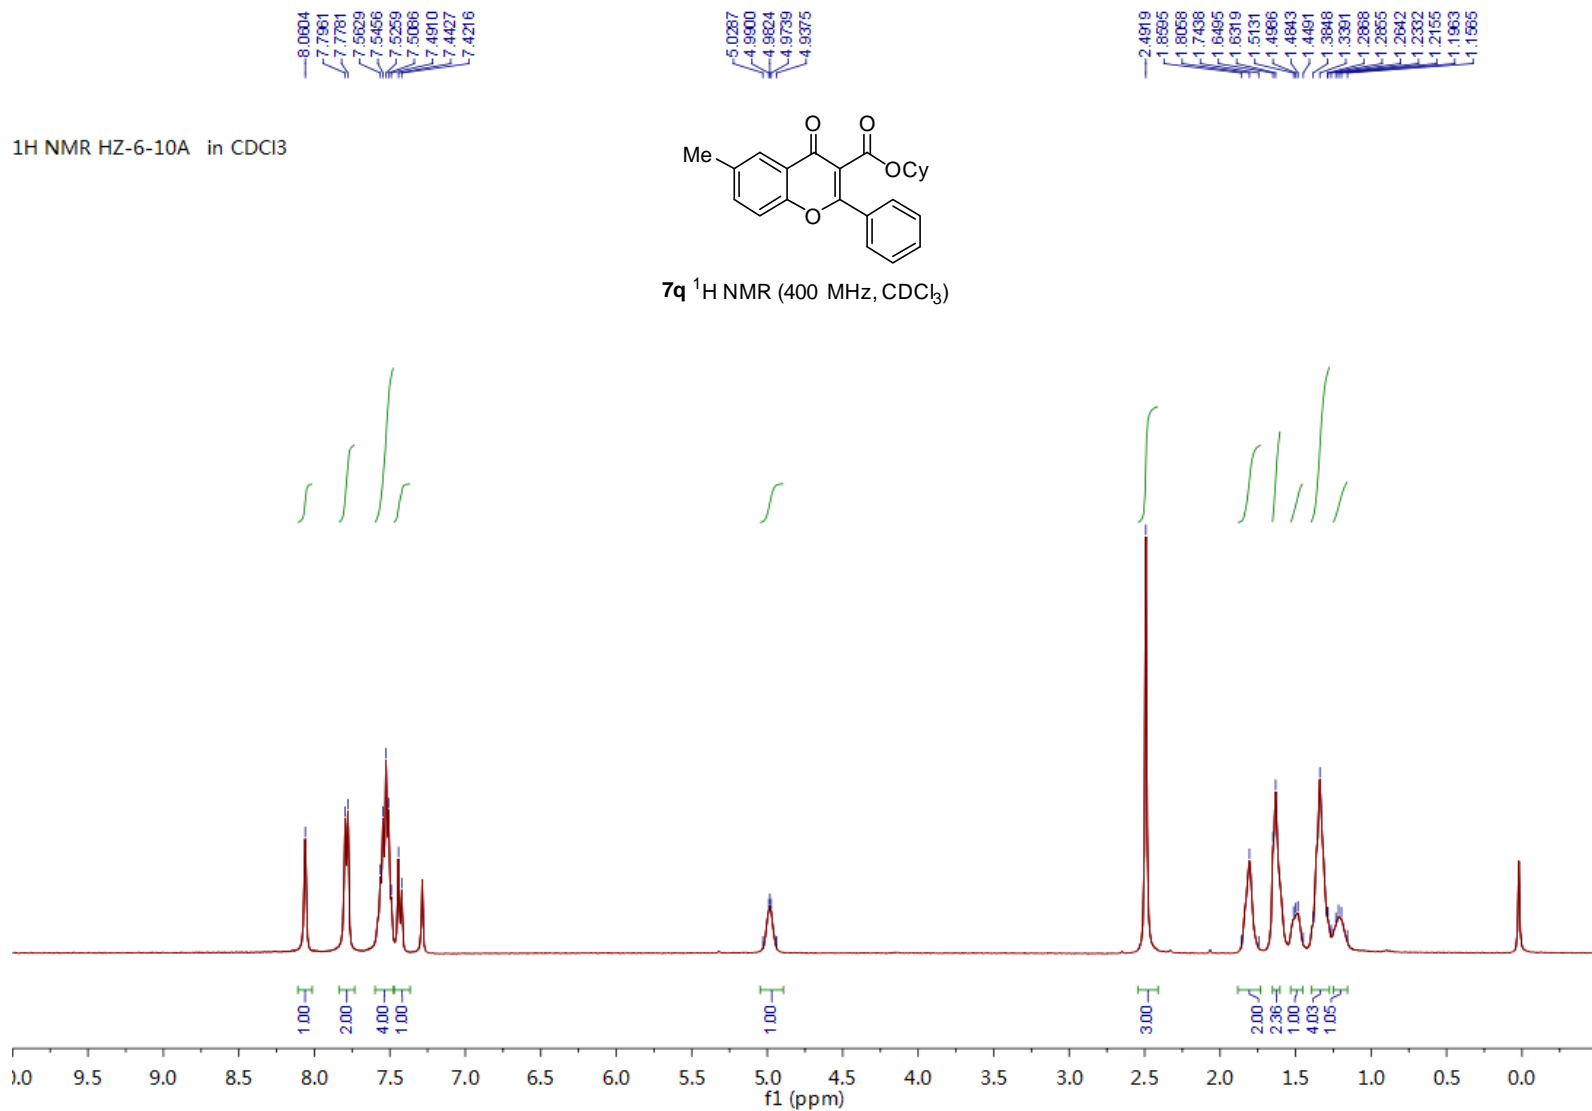

<sup>13</sup>C NMR HZ-6-10A in CDCl<sub>3</sub>

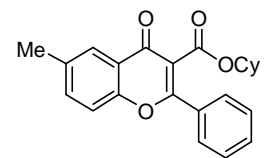

**7q** <sup>13</sup>C NMR (100 MHz, CDCl<sub>3</sub>)

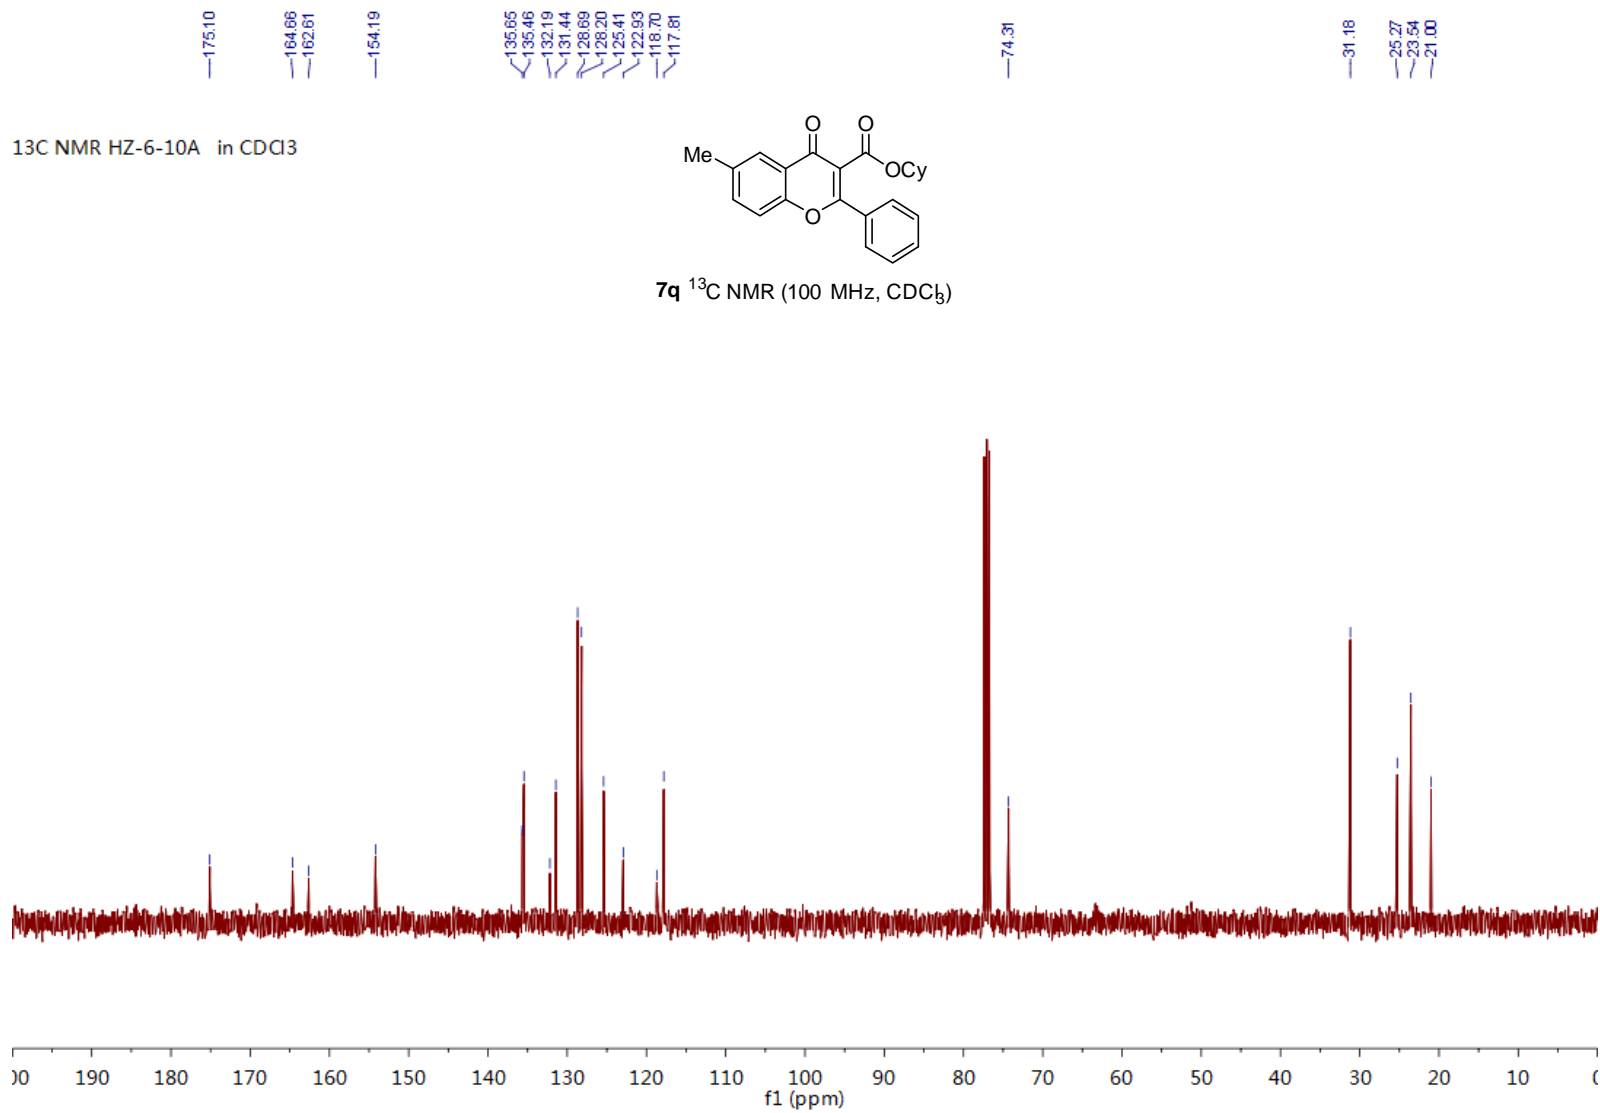

<sup>1</sup>H NMR HZ-6-23 in CDCl<sub>3</sub>

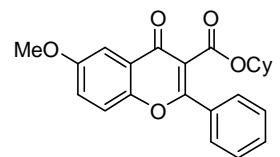

7r <sup>1</sup>H NMR (400 MHz, CDCl<sub>3</sub>)

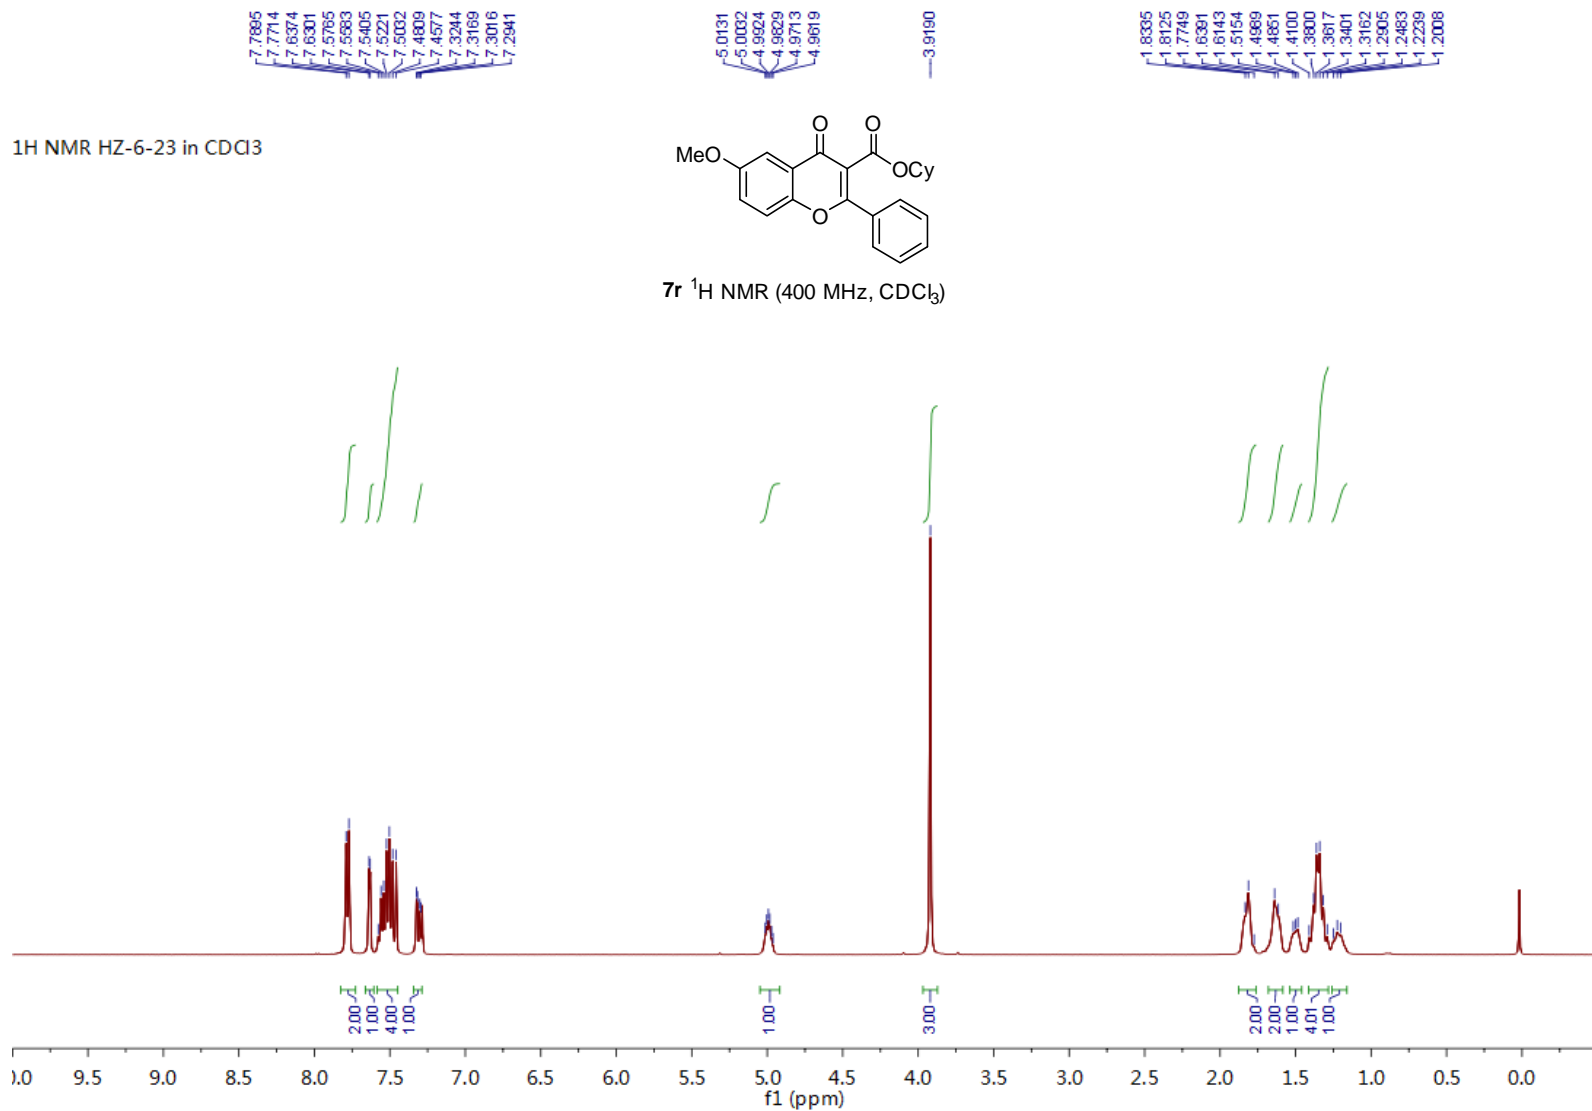

<sup>13</sup>C NMR HZ-6-23 in CDCl<sub>3</sub>

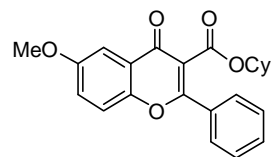

7r <sup>13</sup>C NMR (100 MHz, CDCl<sub>3</sub>)

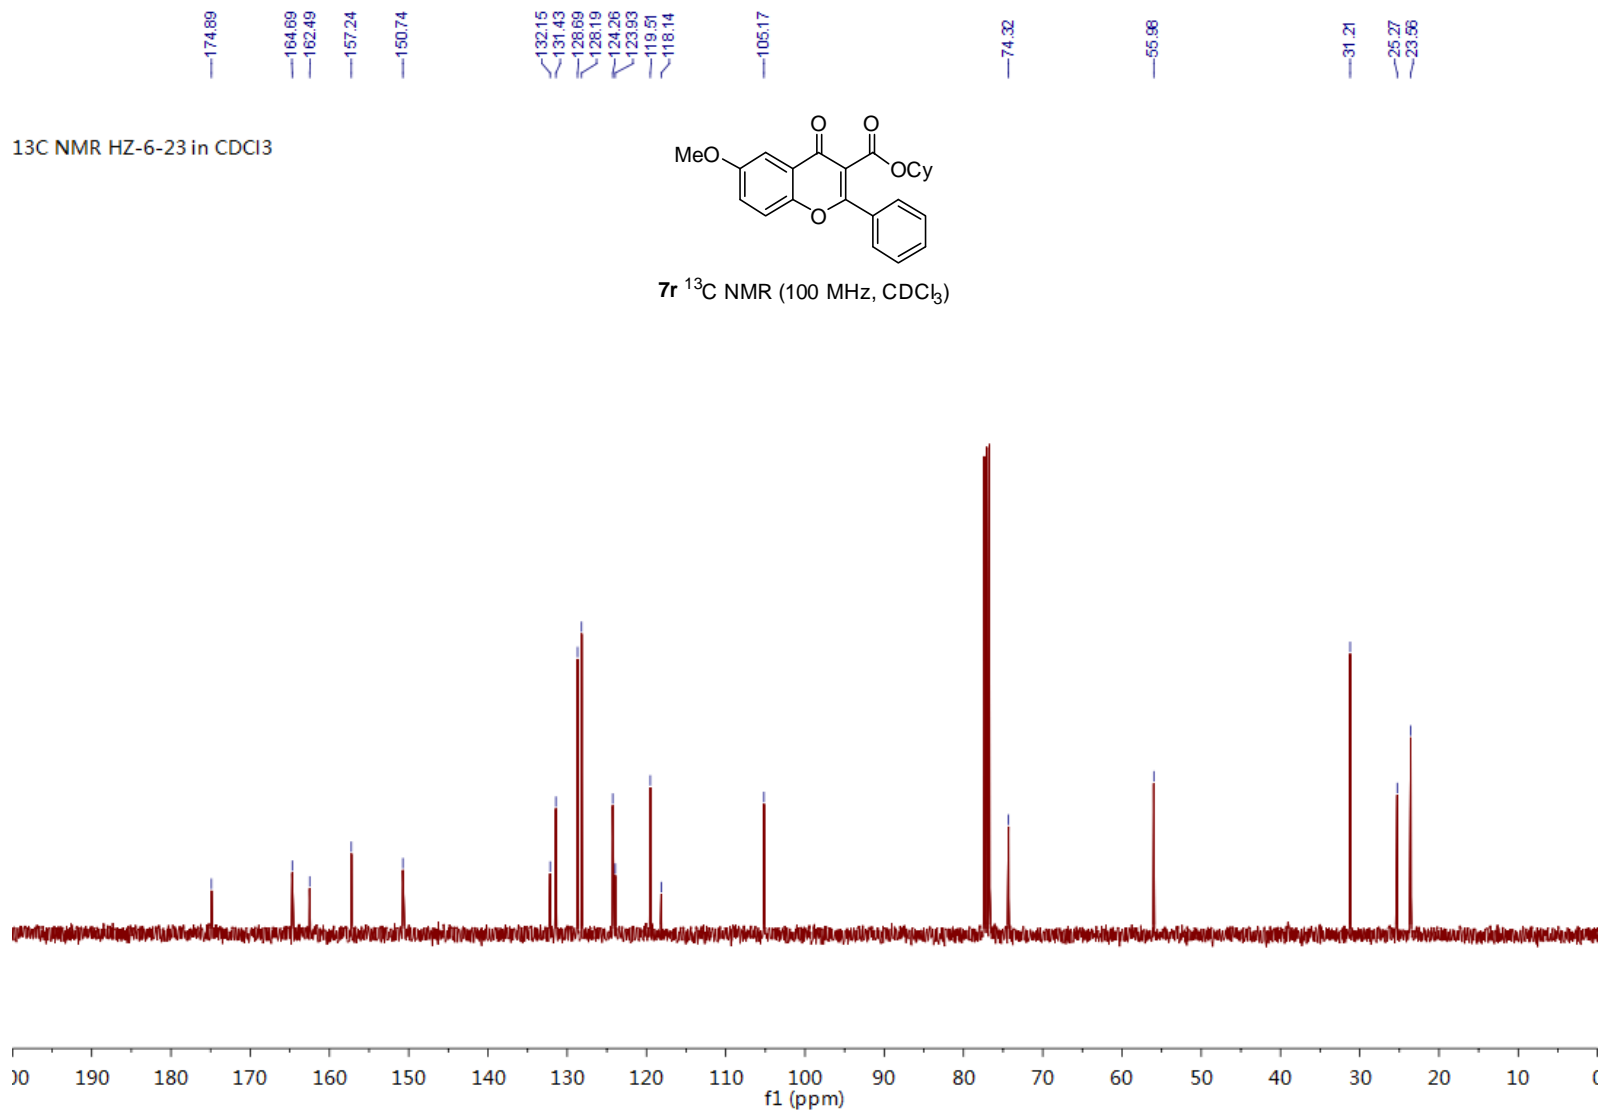

<sup>1</sup>H NMR HZ-6-10B in CDCl<sub>3</sub>

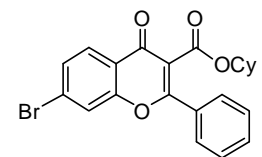

**7s** <sup>1</sup>H NMR (400 MHz, CDCl<sub>3</sub>)

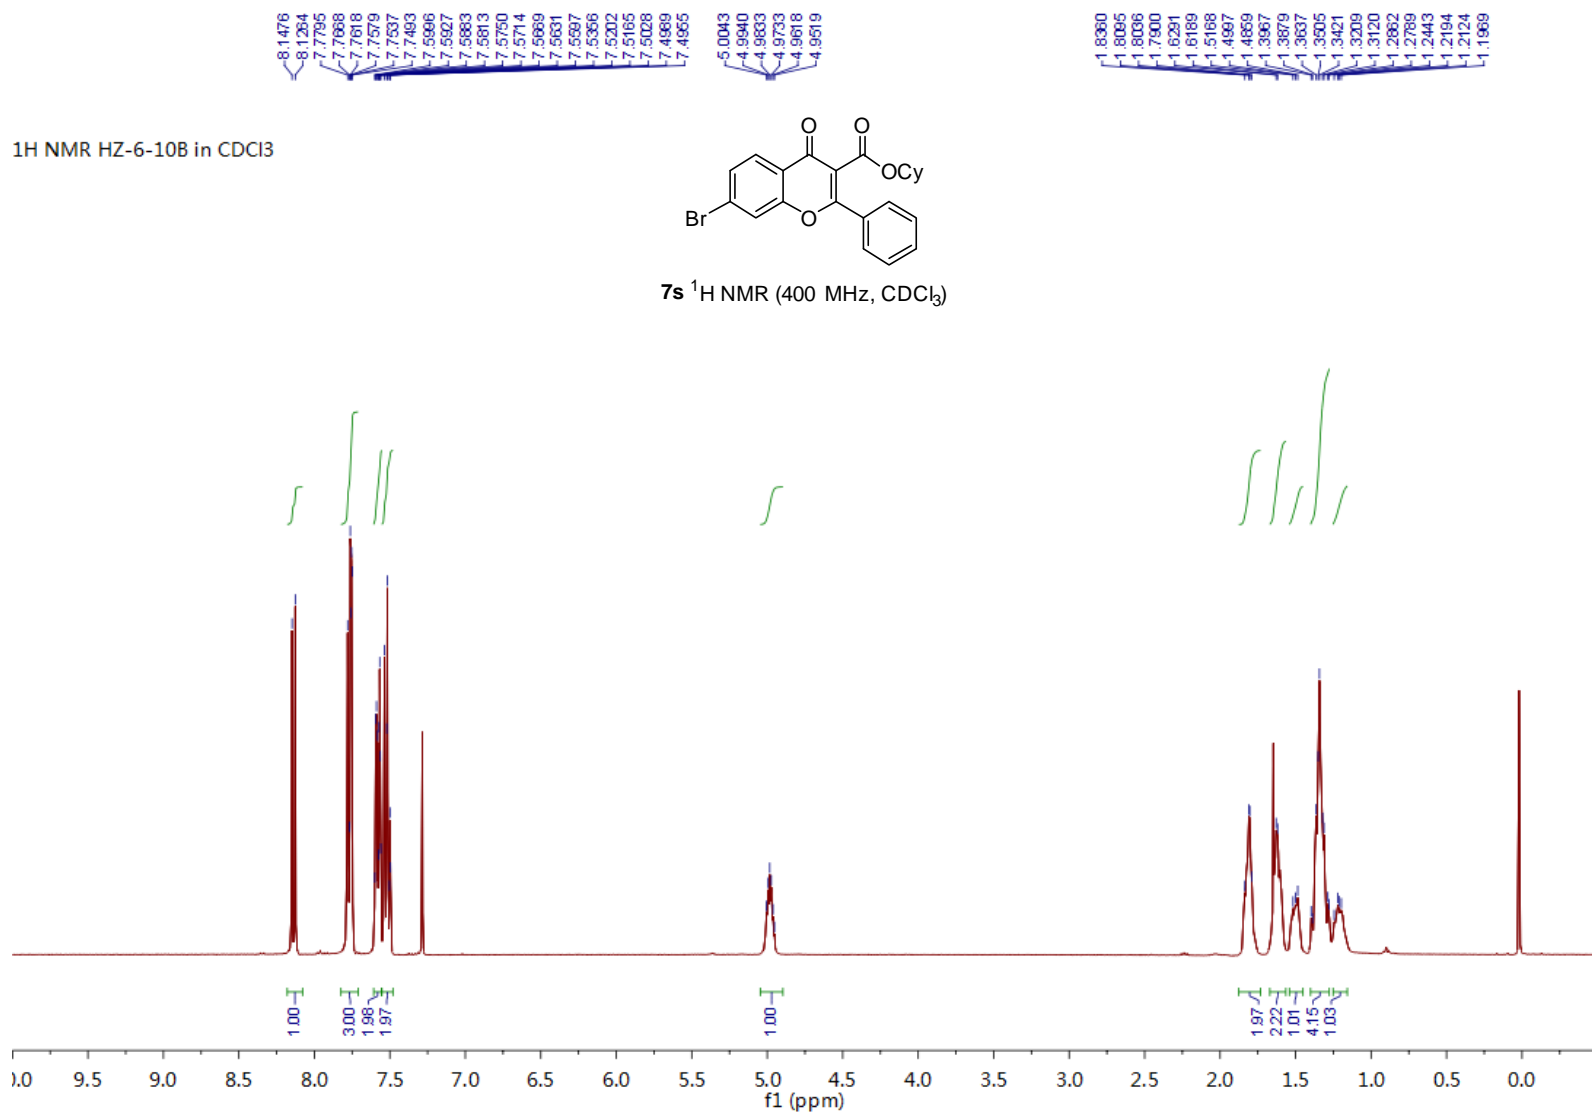

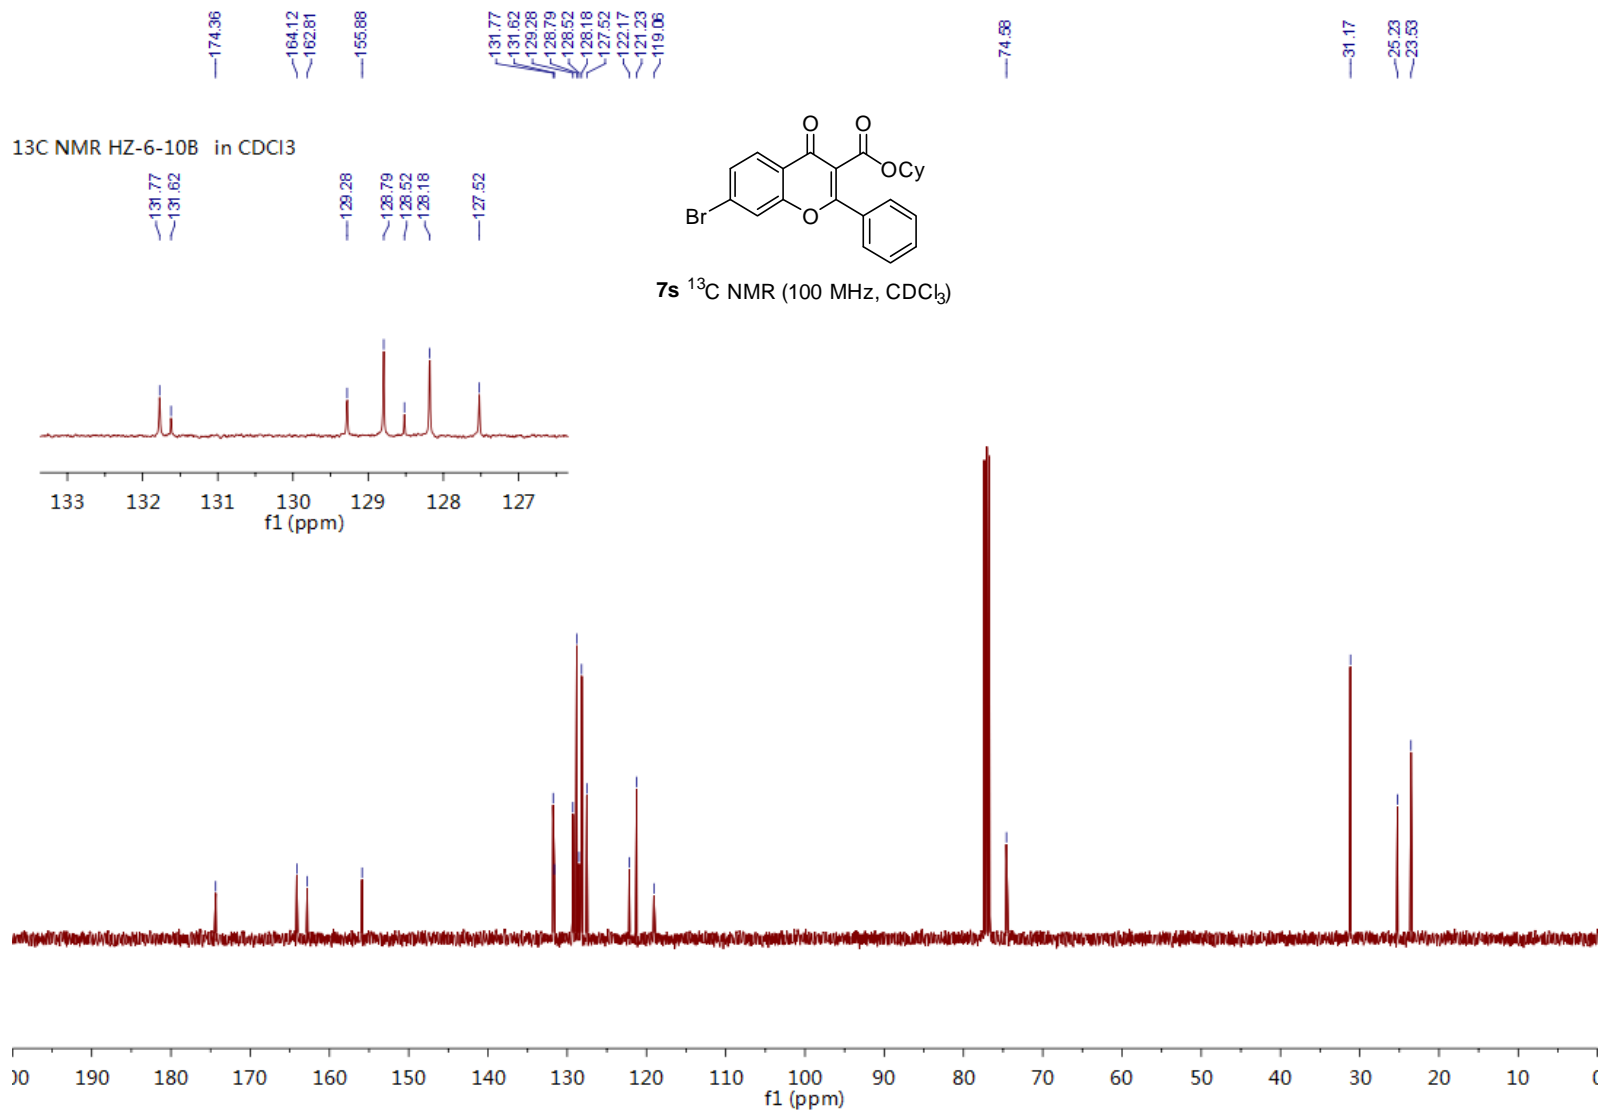

<sup>1</sup>H NMR HZ-5-101B in CDCl<sub>3</sub>

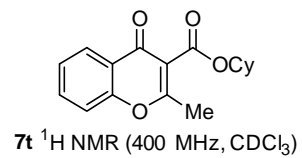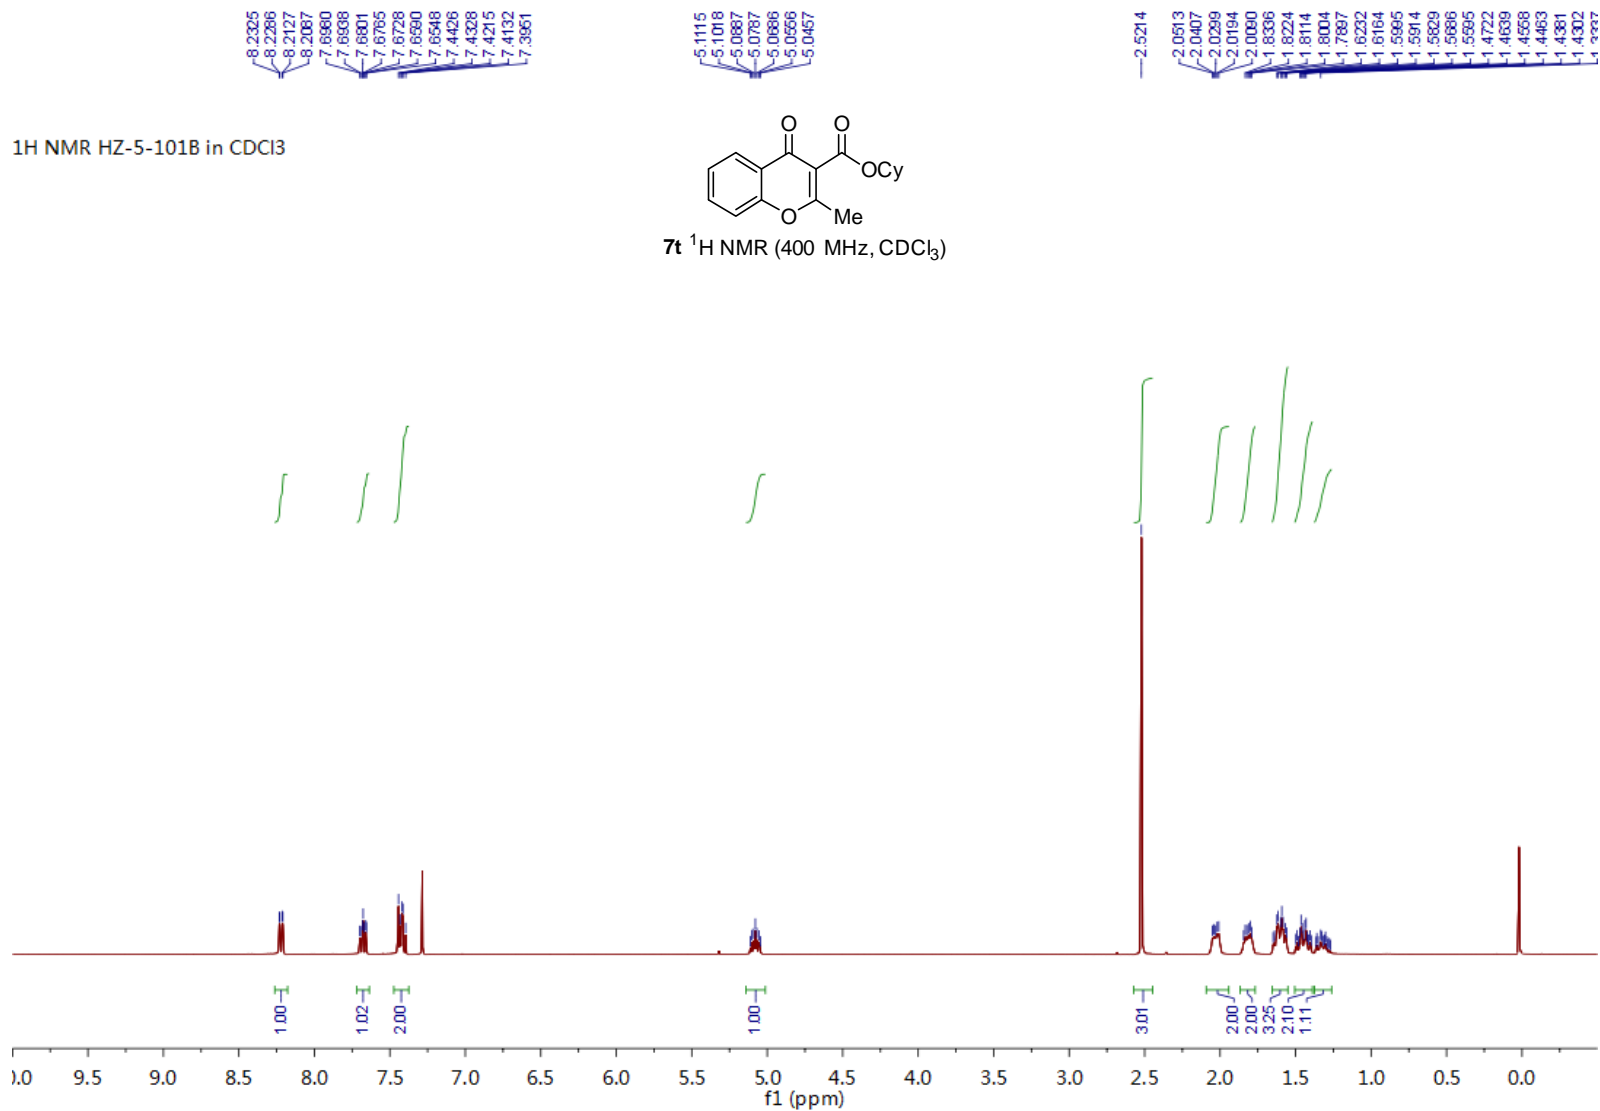



<sup>13</sup>C NMR HZ-5-101B in CDCl<sub>3</sub>

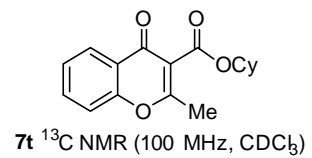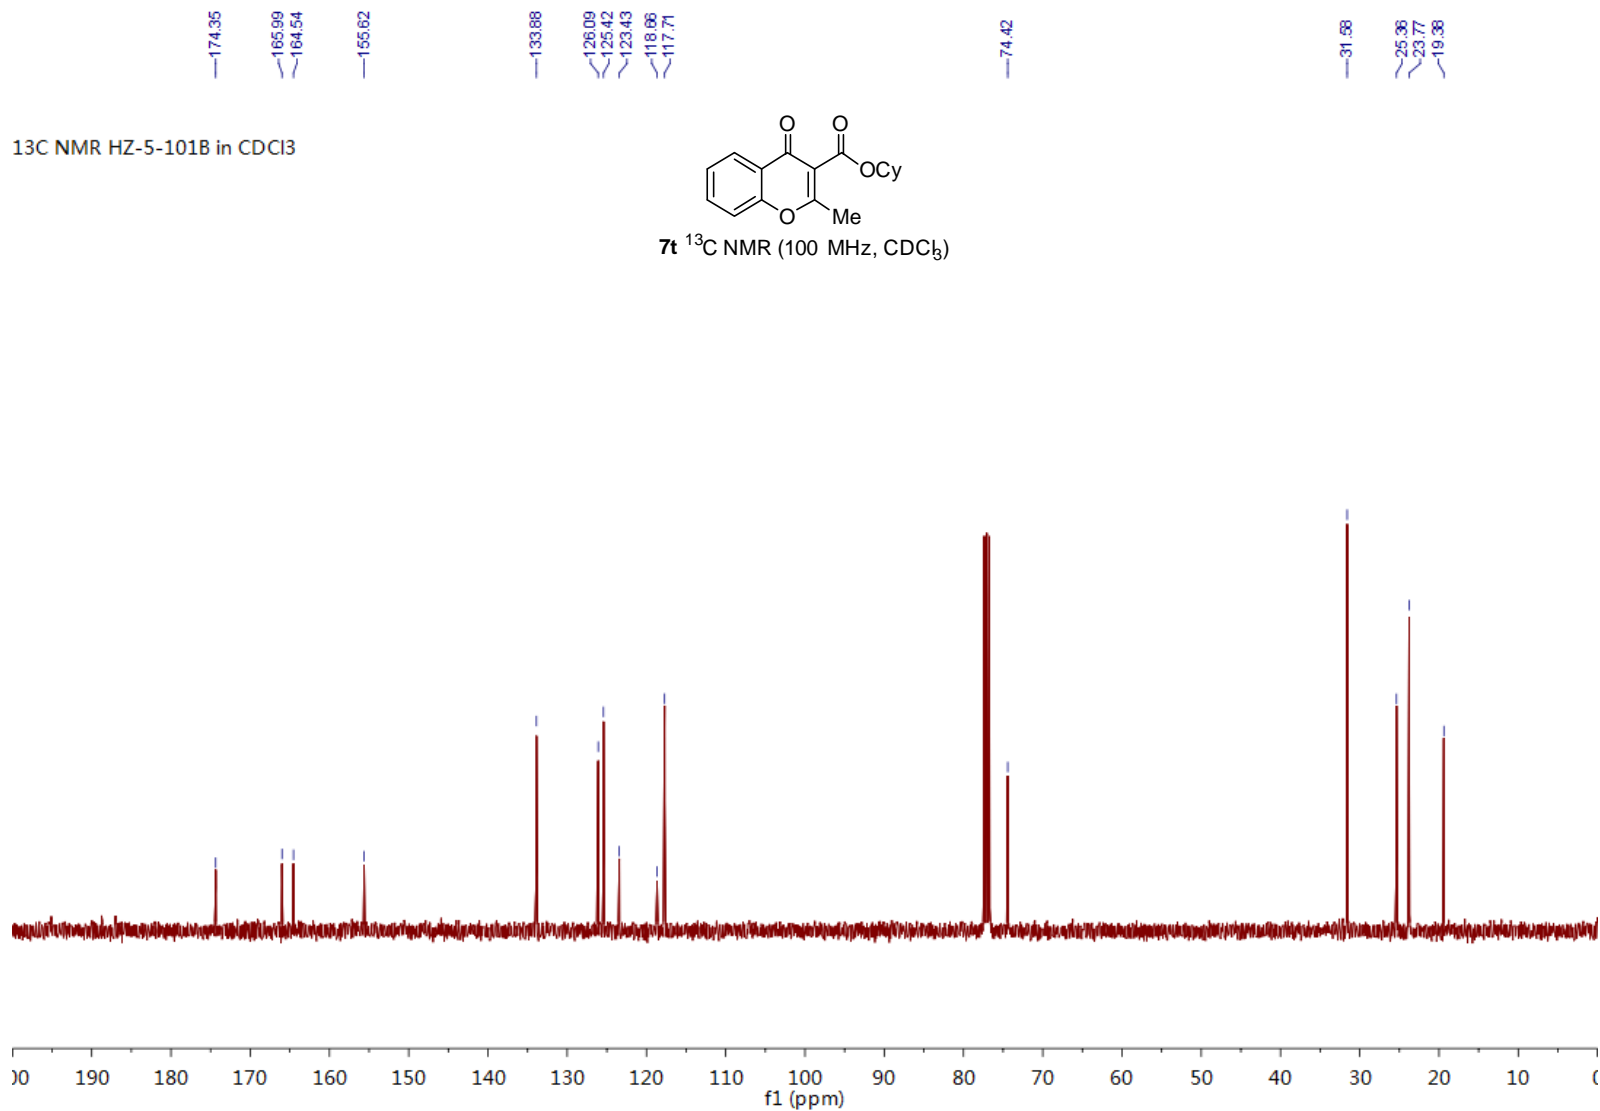

<sup>1</sup>H NMR HZ-6-30 in CDCl<sub>3</sub>

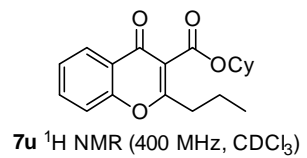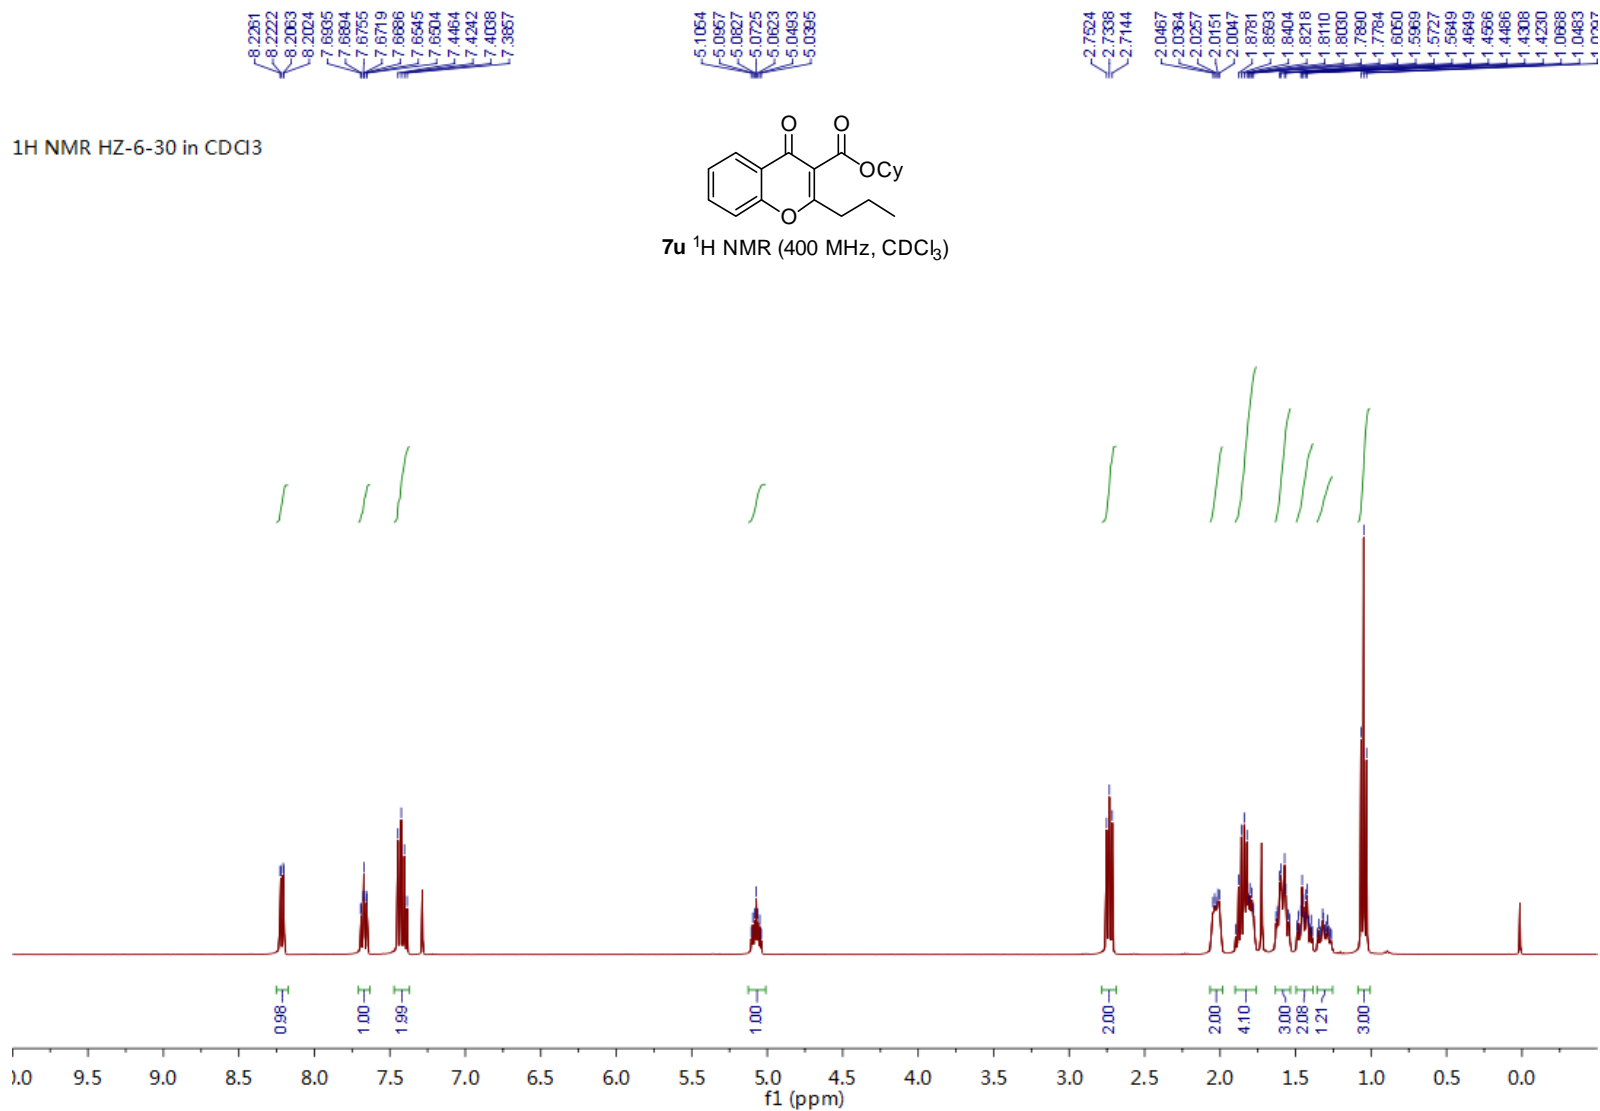

<sup>13</sup>C NMR HZ-6-30 in CDCl<sub>3</sub>

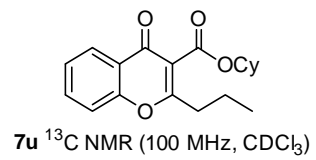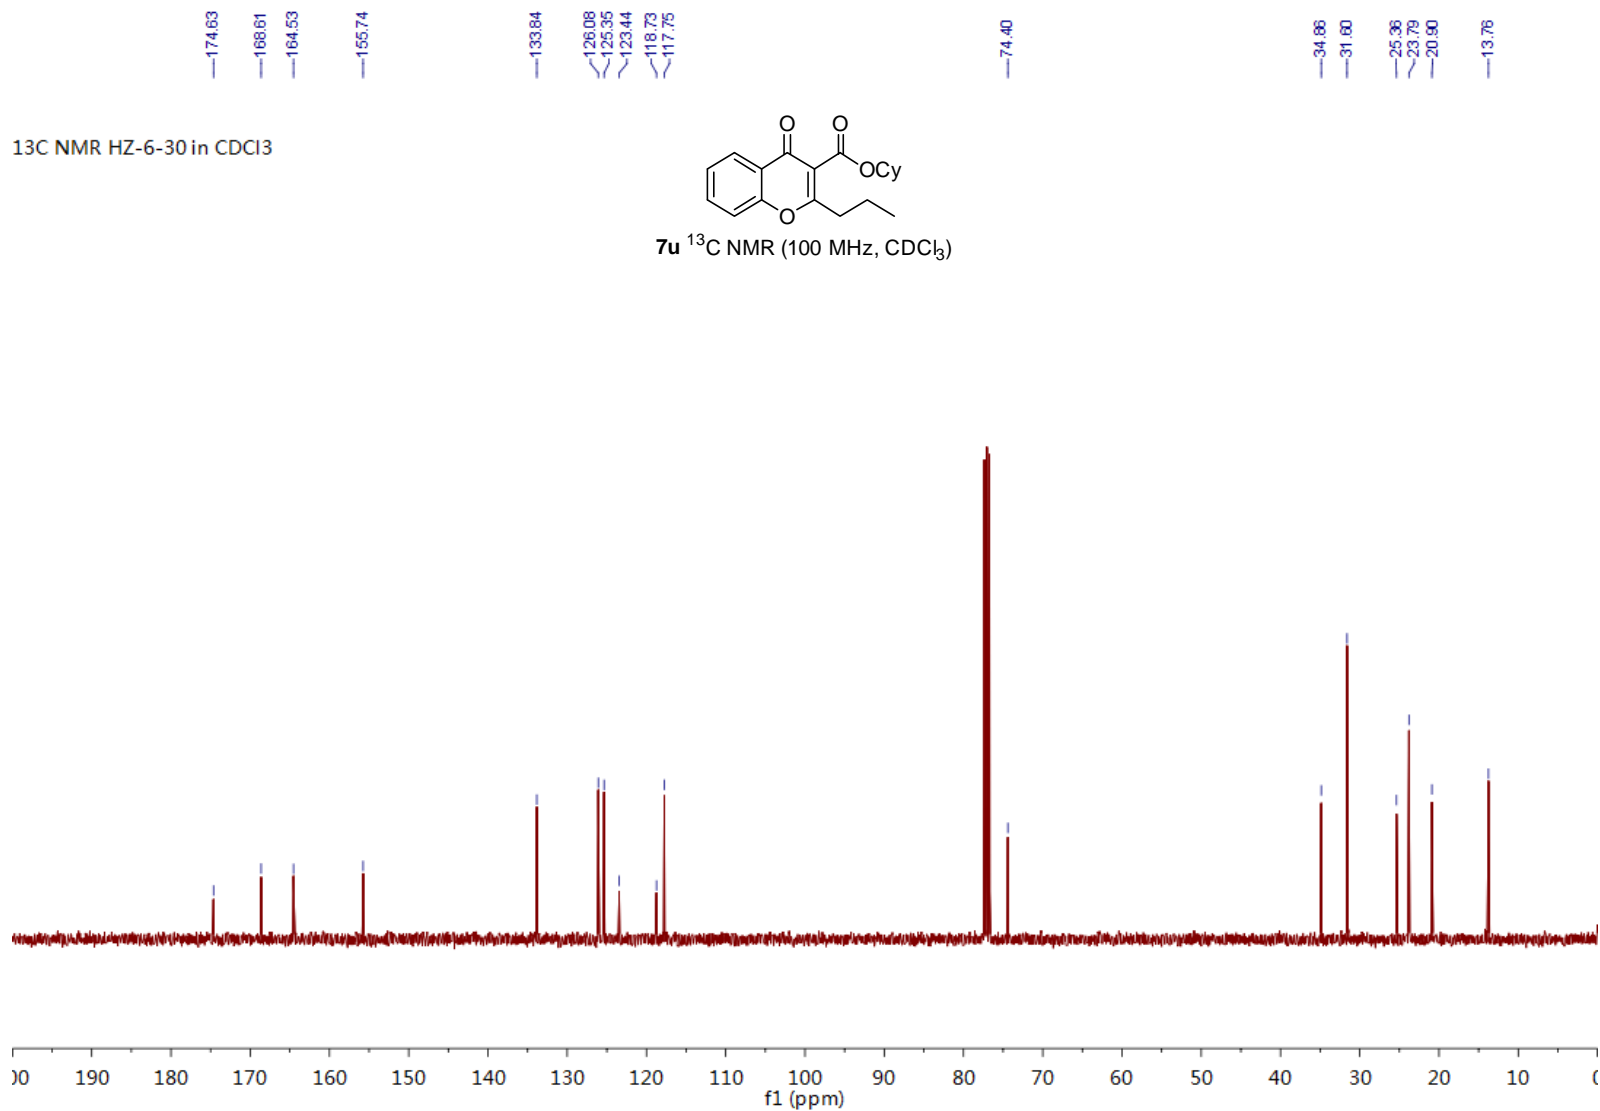

<sup>1</sup>H NMR HZ-6-31 in CDCl<sub>3</sub>

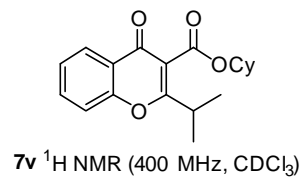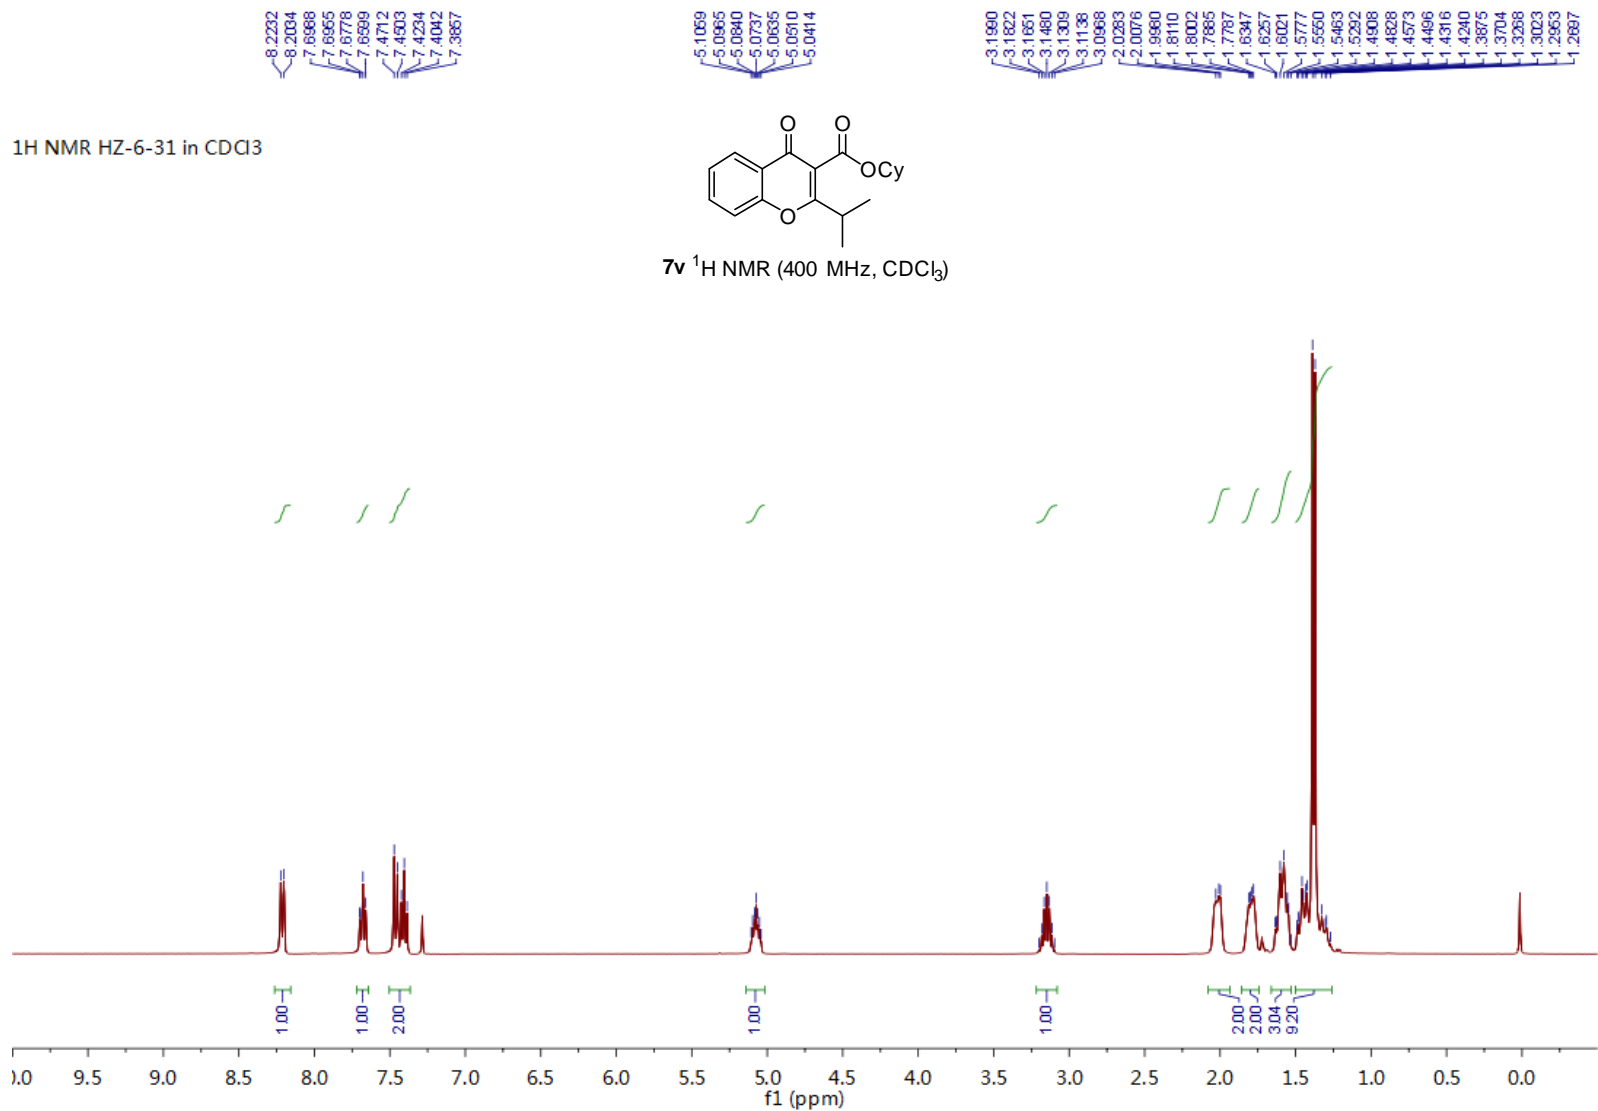

<sup>13</sup>C NMR HZ-6-31 in CDCl<sub>3</sub>

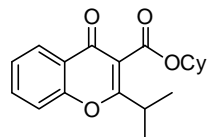

**7v** <sup>13</sup>C NMR (100 MHz, CDCl<sub>3</sub>)

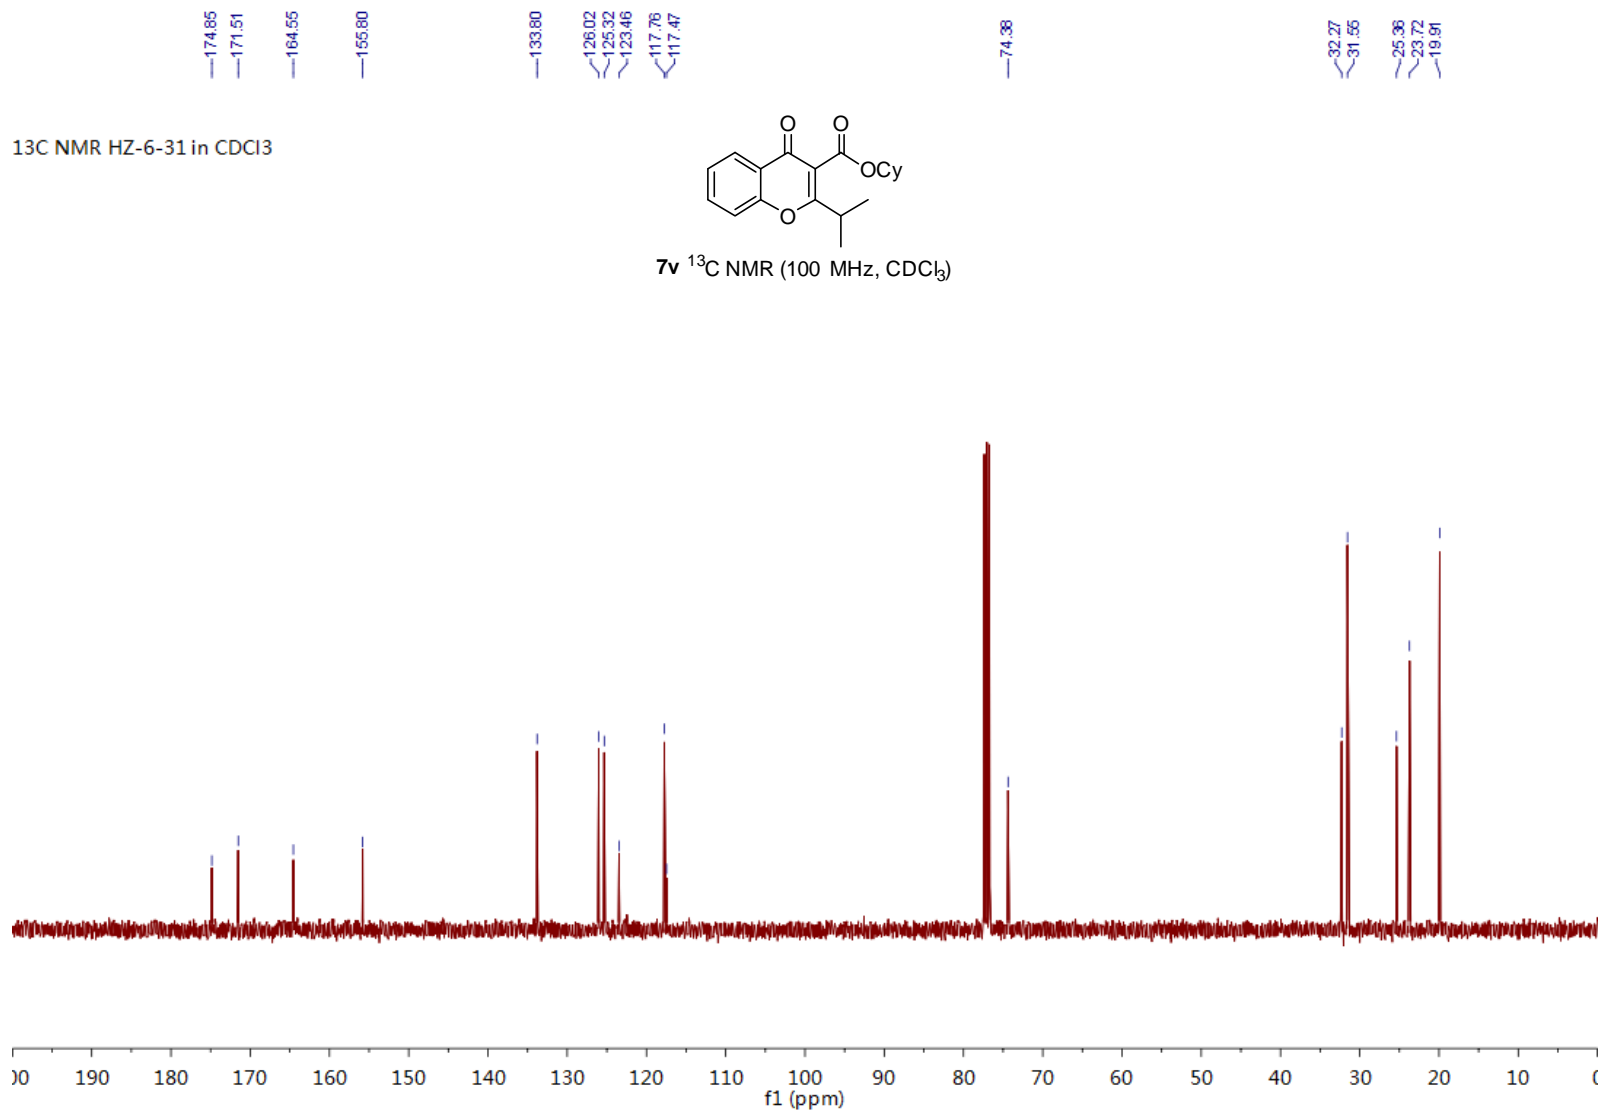

<sup>1</sup>H NMR HZ-6-12 in CDCl<sub>3</sub>

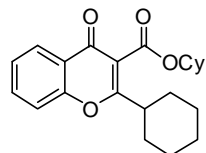

**7w** <sup>1</sup>H NMR (400 MHz, CDCl<sub>3</sub>)

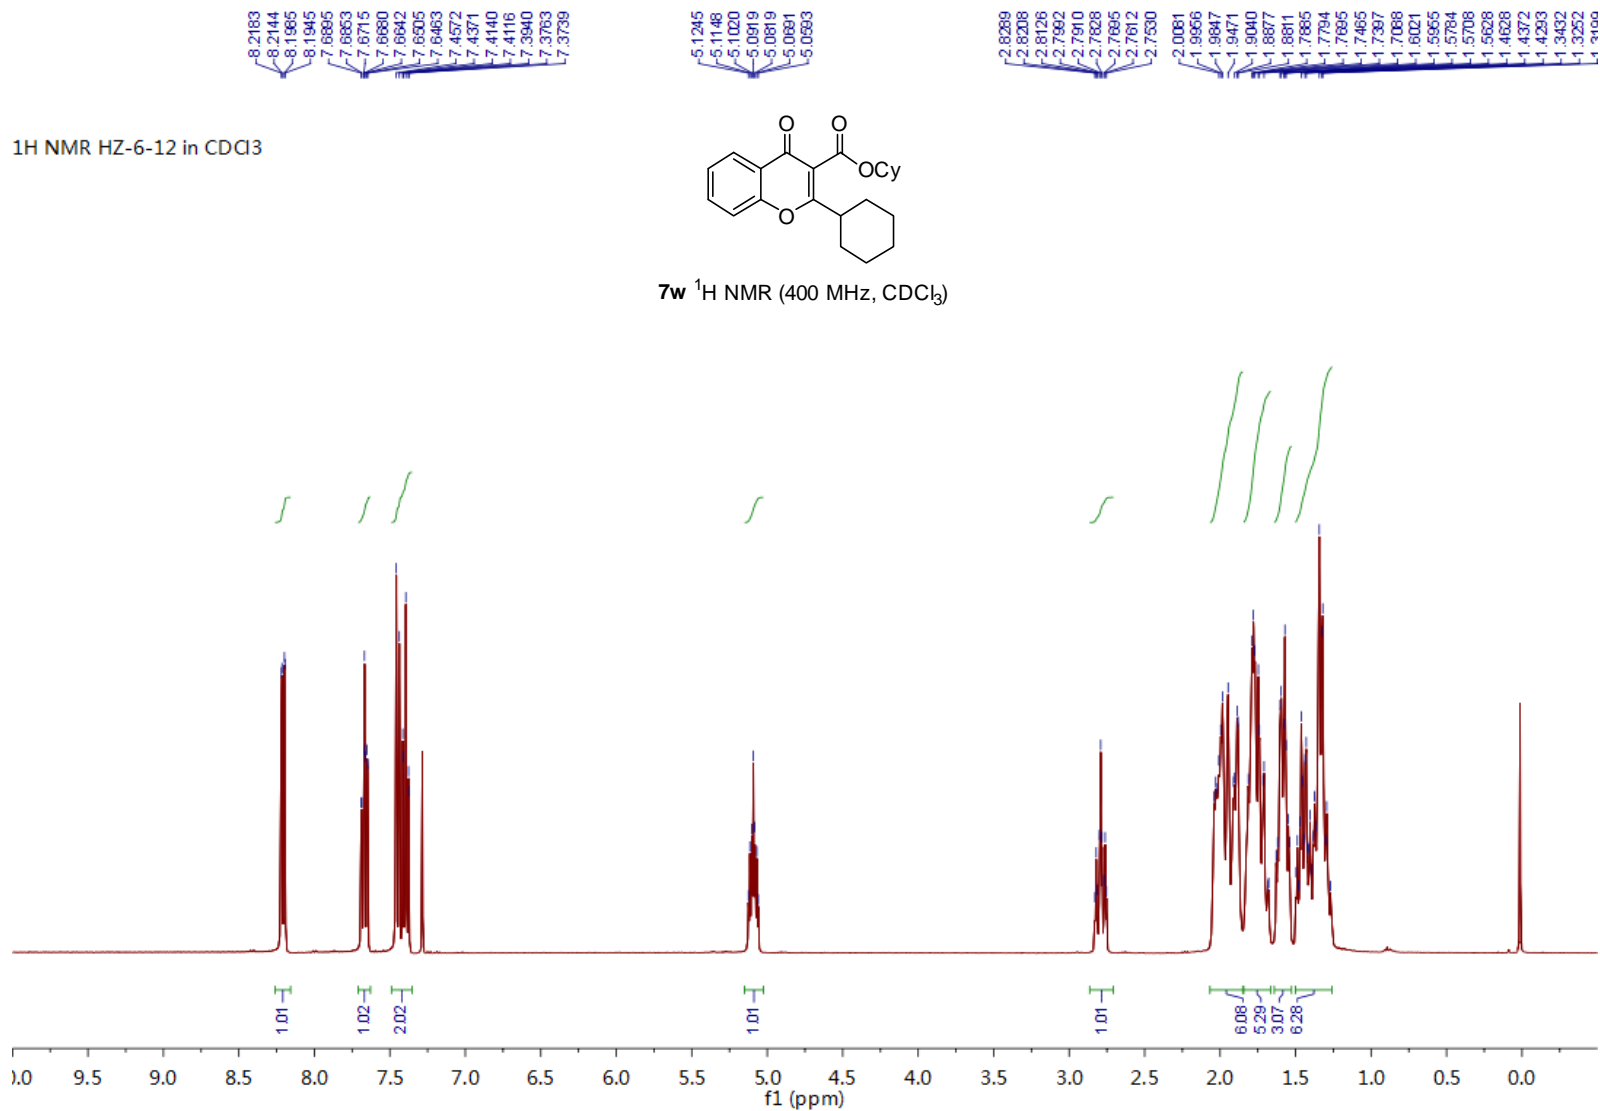

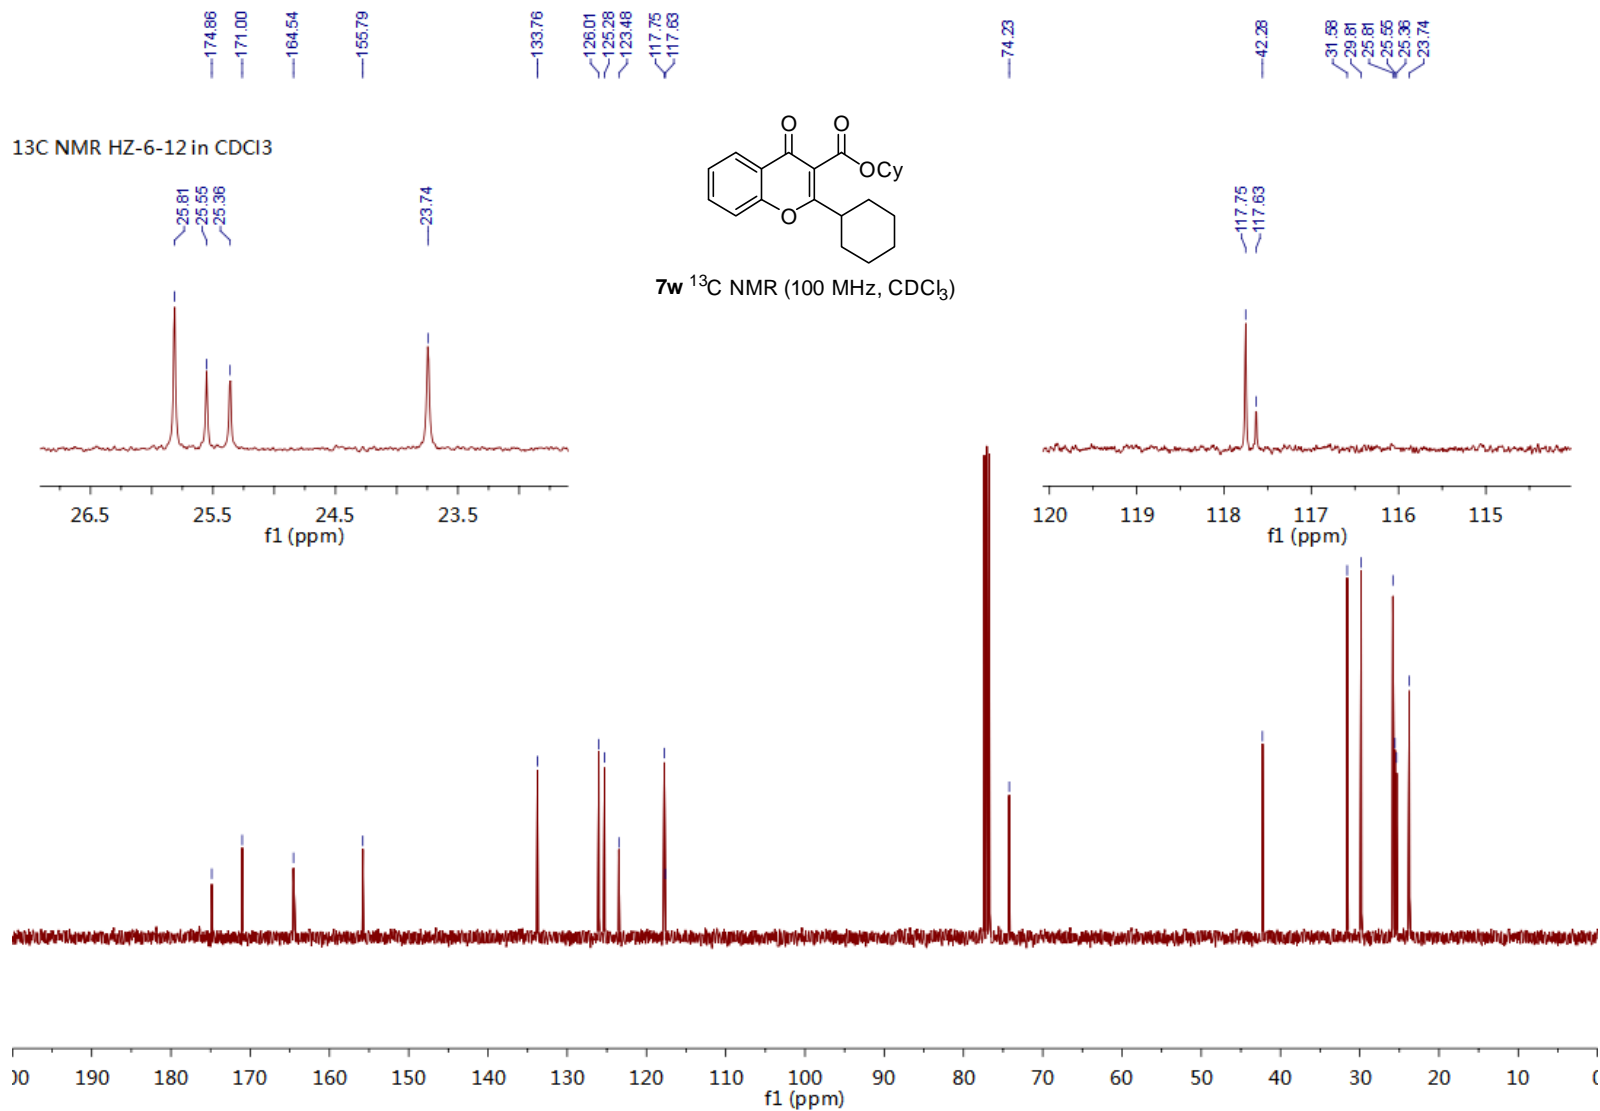

<sup>1</sup>H NMR HZ-5-39A in CDCl<sub>3</sub>

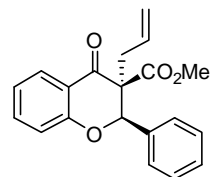

**8a** <sup>1</sup>H NMR (400 MHz, CDCl<sub>3</sub>)

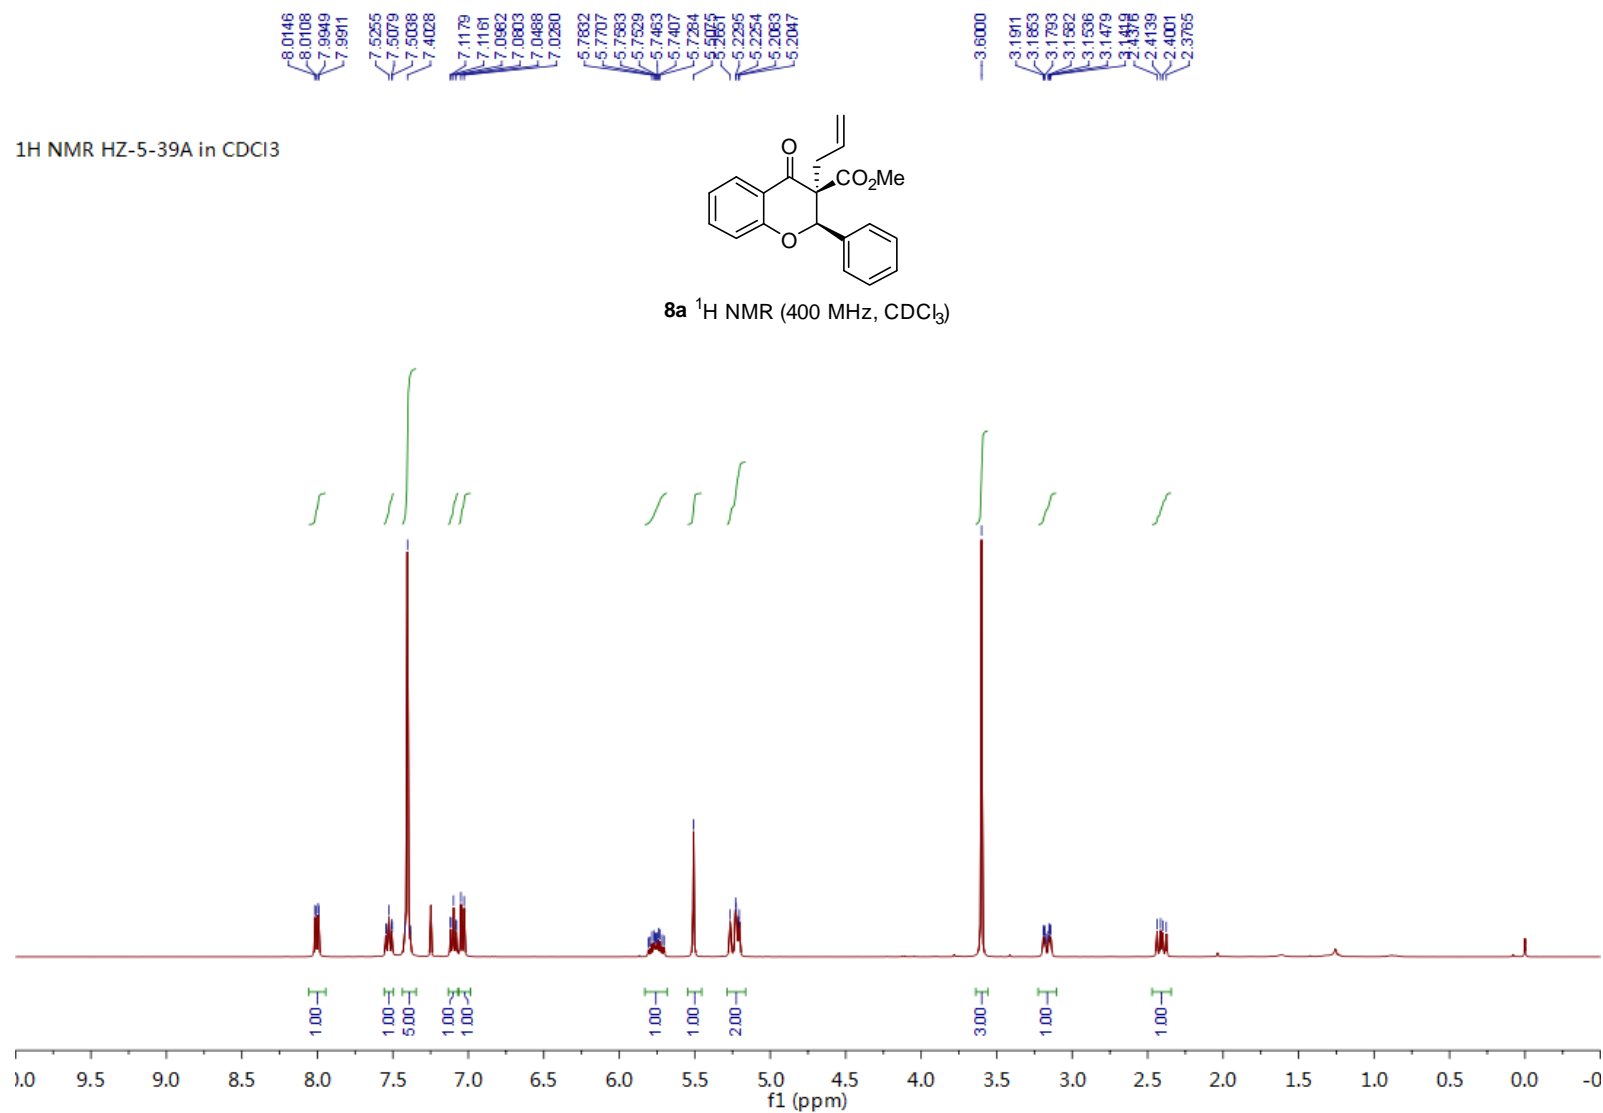



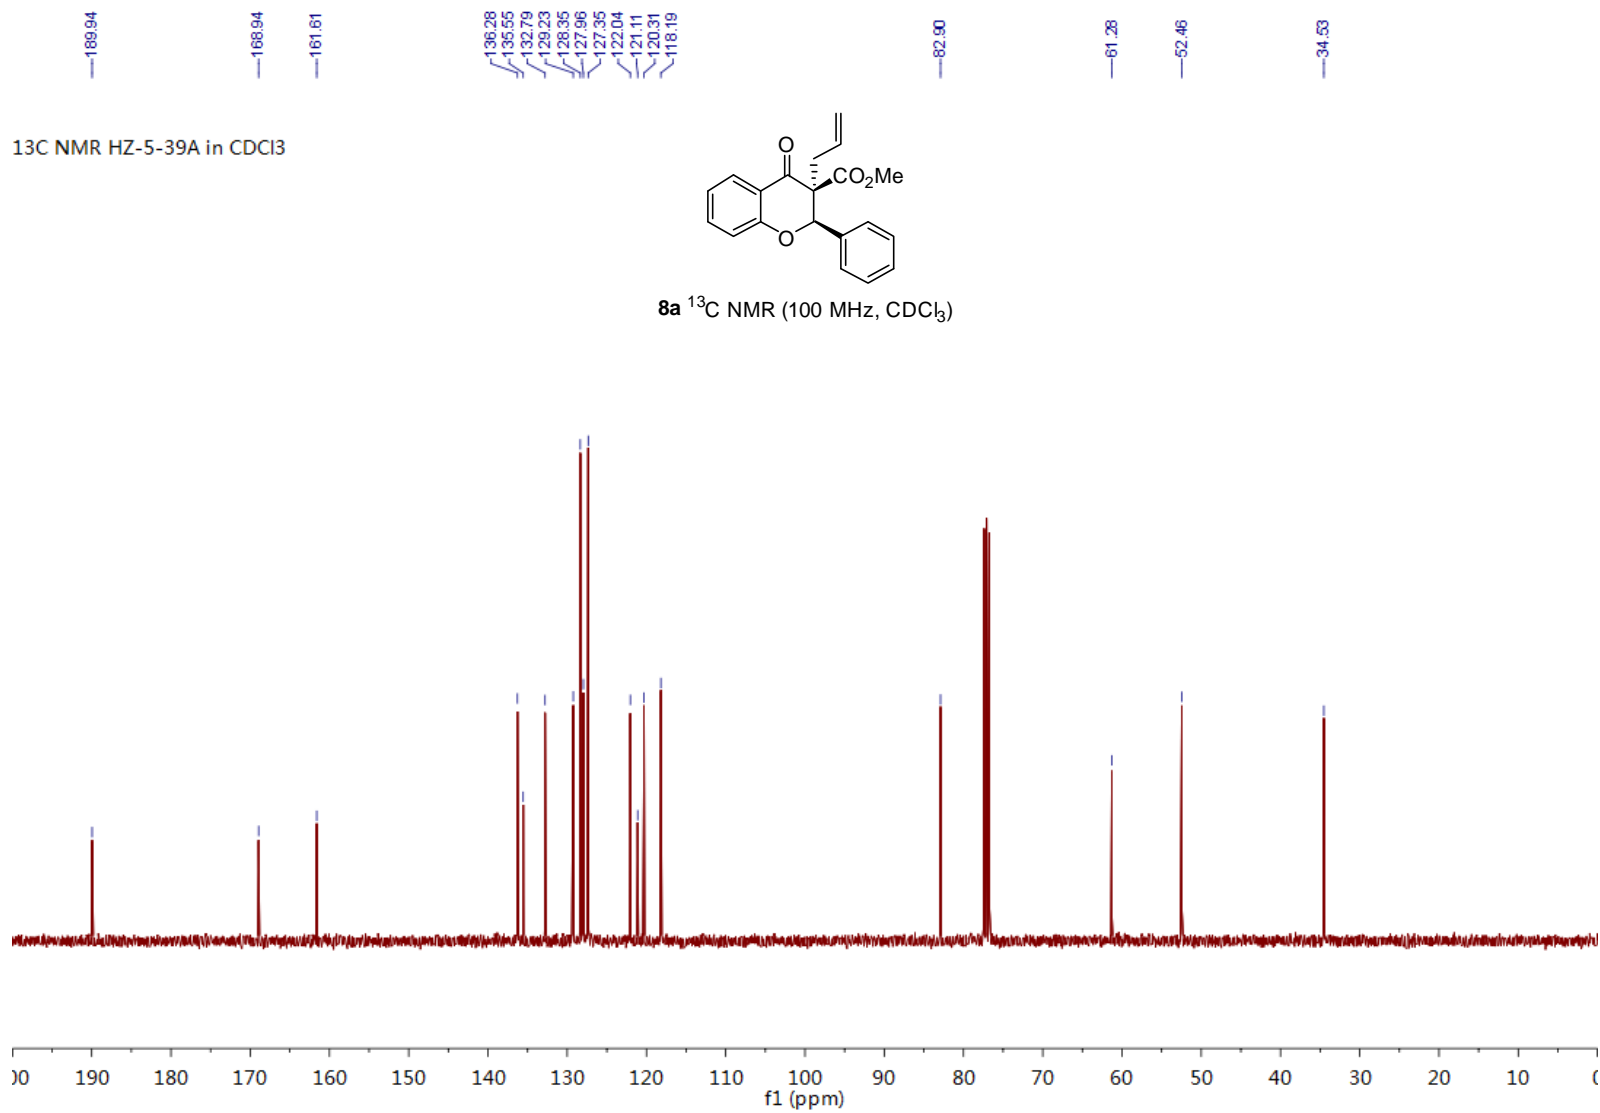

<sup>1</sup>H NMR HZ-5-36 in CDCl<sub>3</sub>

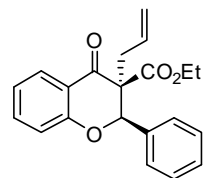

**8b** <sup>1</sup>H NMR (400 MHz, CDCl<sub>3</sub>)

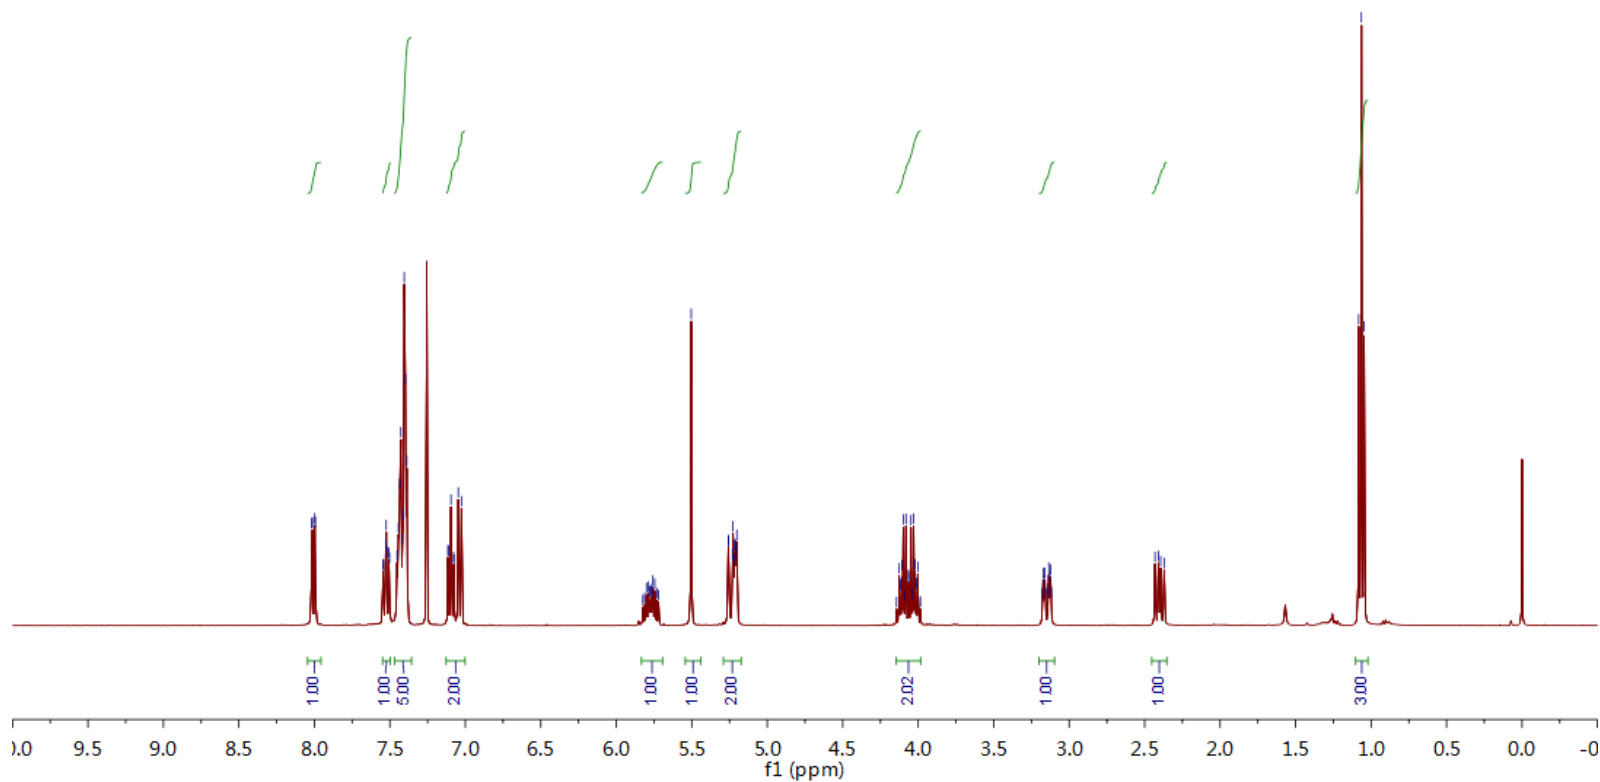

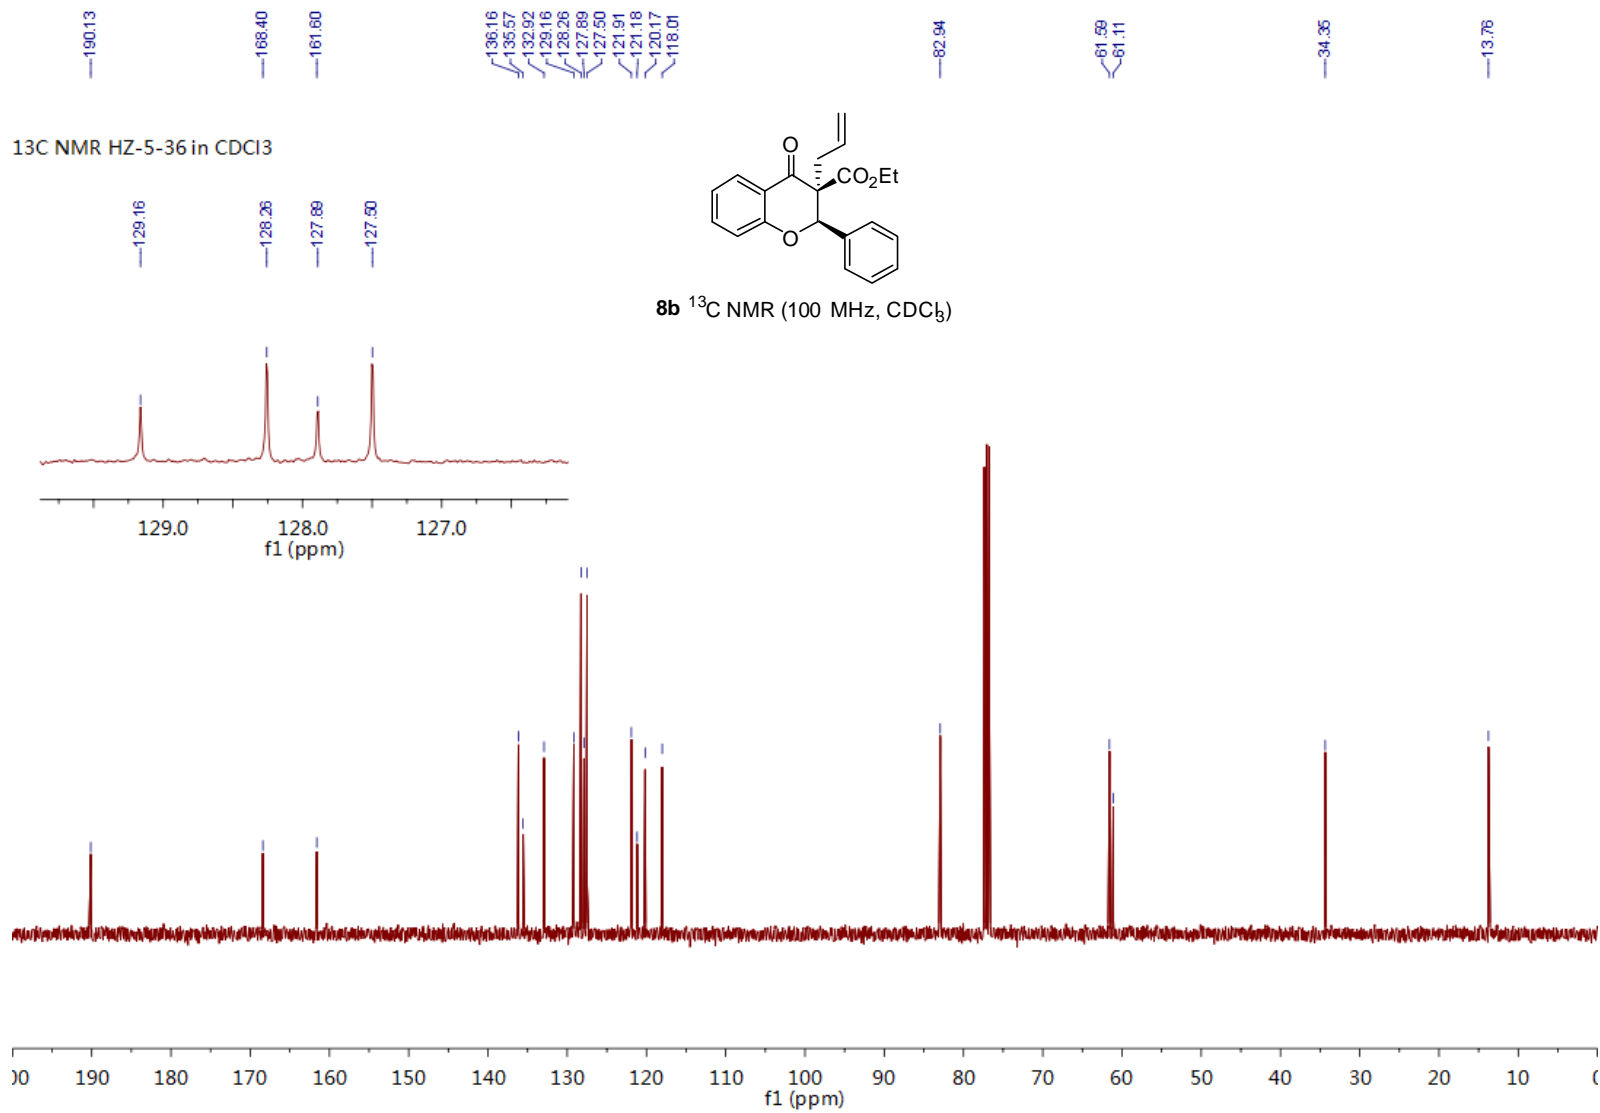

8.0417  
8.0376  
8.0219  
8.0179  
7.9976  
7.9632  
7.9496  
7.9465  
7.9424  
7.9288  
7.9244  
7.9059  
7.8991  
7.8974  
7.8954  
7.8914  
7.8885  
7.8816  
7.8721  
7.8369  
7.8308  
7.8273  
7.8230  
7.8145  
7.8136  
7.8134  
7.8118  
7.8114  
7.8146  
7.8089  
7.8064  
7.8078  
7.8092  
7.8499  
7.8483  
7.8686  
5.8466  
5.8352  
5.8331  
5.8230  
5.8210  
5.8160  
5.8087  
5.8039  
5.7977  
5.7926  
5.7906  
5.7804  
5.7784  
5.7671  
5.7560  
5.6164  
5.2758  
5.2738  
5.2710  
5.2521  
5.2482  
5.2437  
5.2331  
5.2311  
5.2278  
5.2265  
5.2228  
5.2183  
4.9801  
4.9645  
4.9466  
4.9332  
4.9175  
3.1798  
3.1748  
3.1684  
3.1627  
3.1577  
3.1423  
3.1373  
3.1317  
3.1252  
3.1202  
2.4445  
2.4212  
2.4070  
2.3837  
1.1651  
1.1495  
1.0090  
0.9934

$^1\text{H}$  NMR HZ-5-69A in  $\text{CDCl}_3$

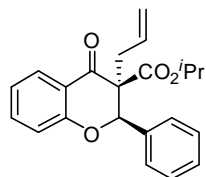

**8c**  $^1\text{H}$  NMR (400 MHz,  $\text{CDCl}_3$ )

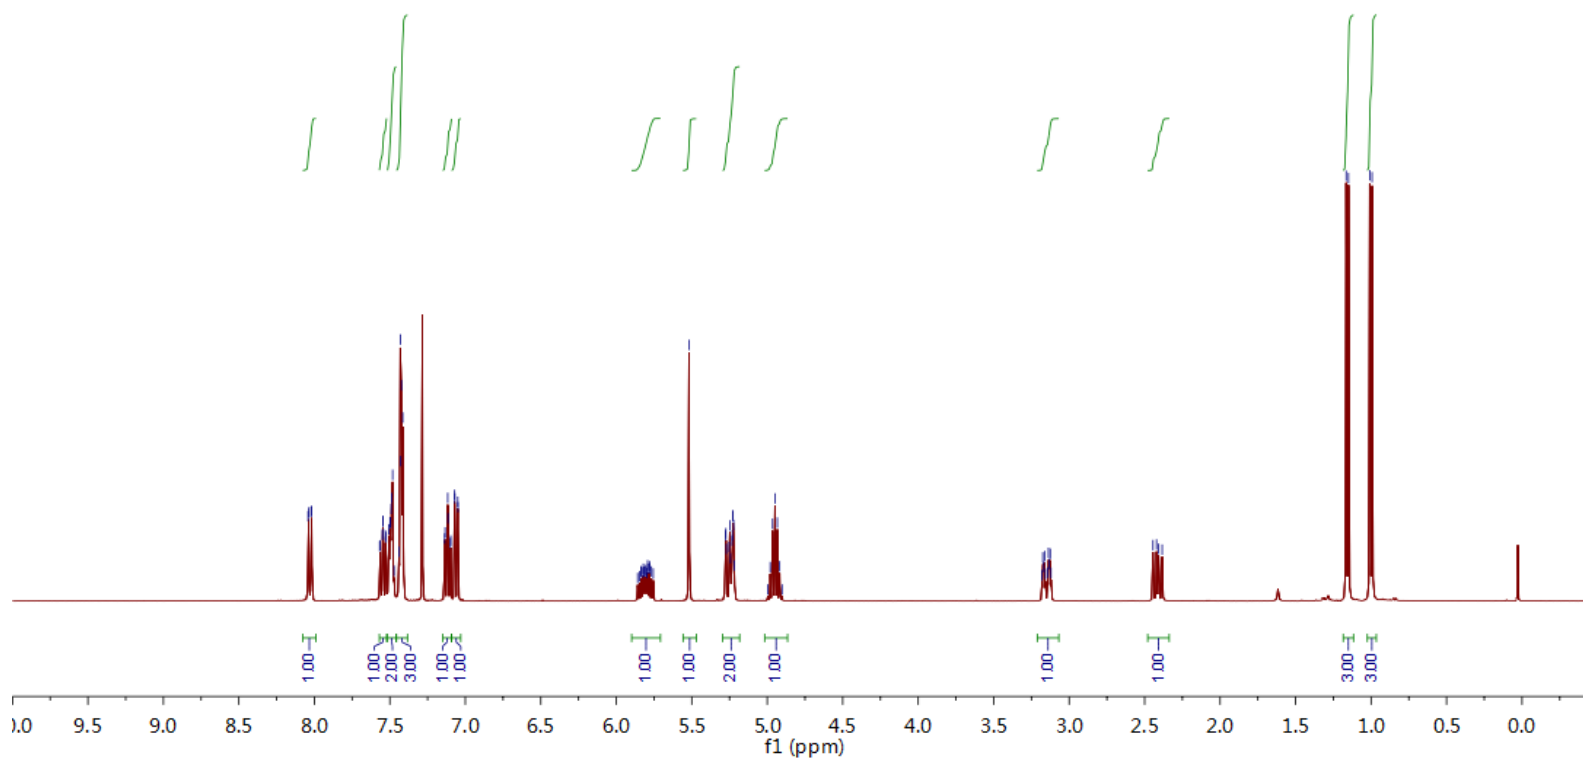

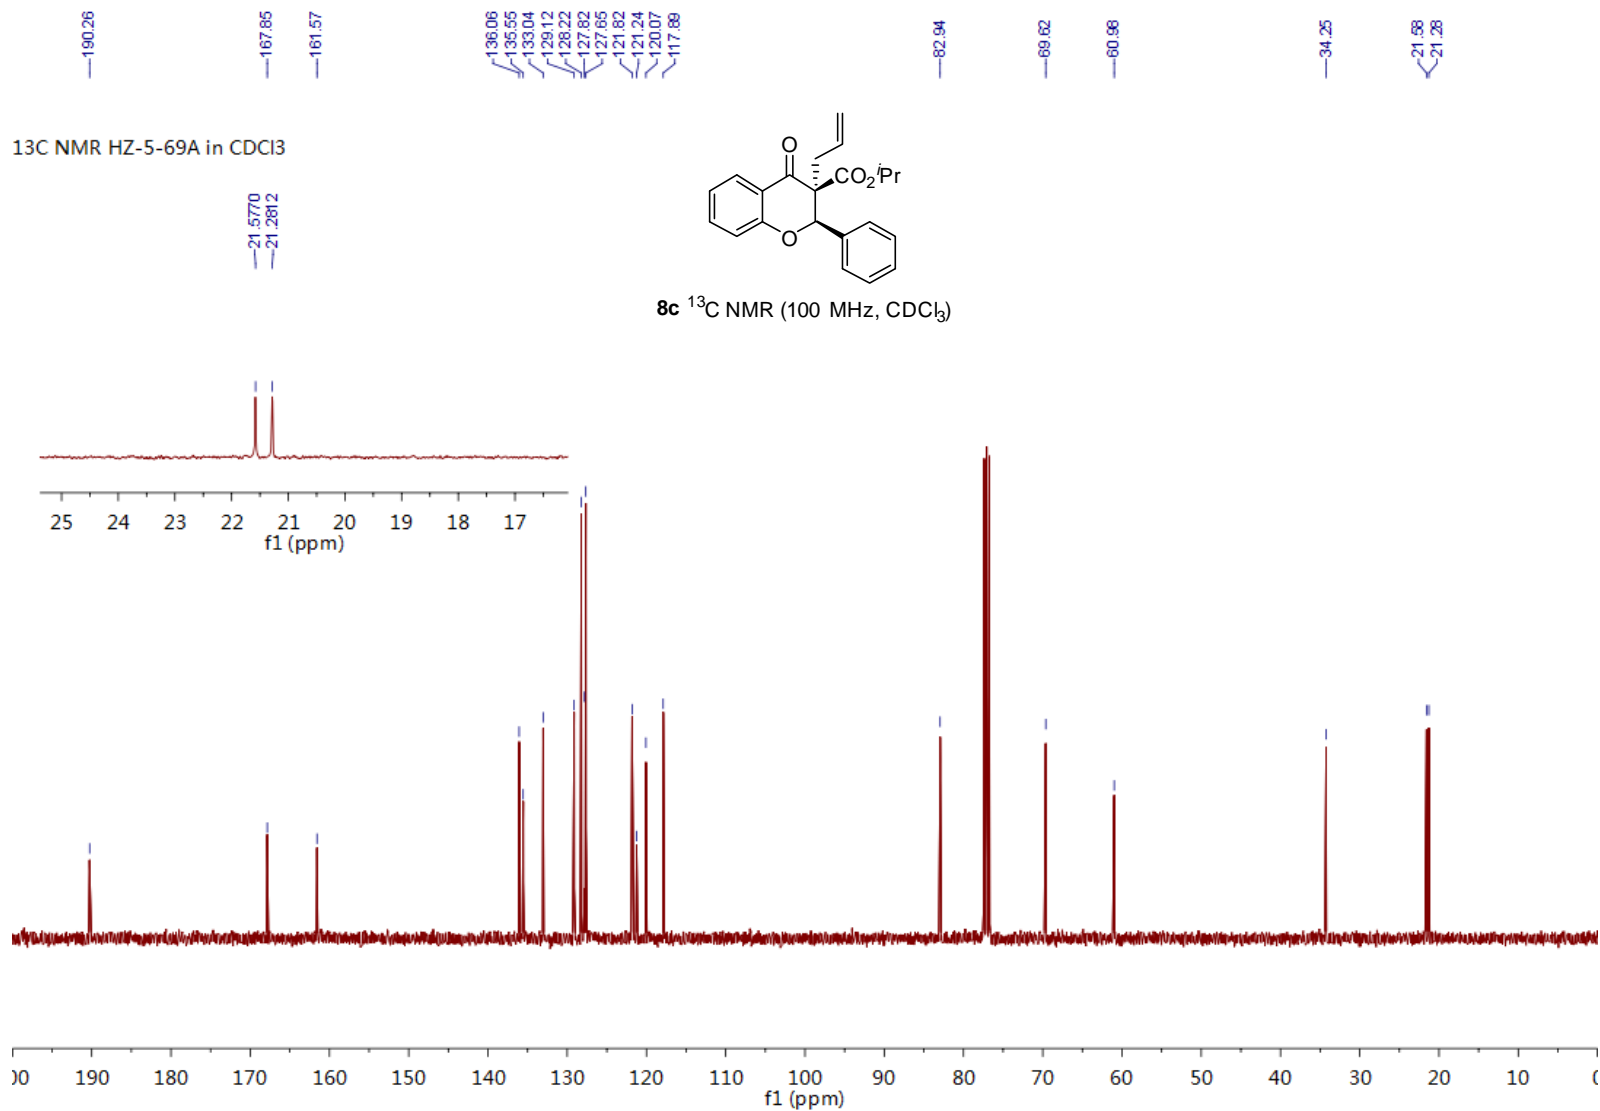

8.0479  
8.0437  
8.0282  
8.0240  
7.5718  
7.5674  
7.5537  
7.5499  
7.5467  
7.5330  
7.5286  
7.4712  
7.4687  
7.4530  
7.4451  
7.4423  
7.4389  
7.4345  
7.4269  
7.4224  
7.4172  
7.1414  
7.1390  
7.1213  
7.1037  
7.1013  
7.0704  
7.0692  
7.0486  
5.8312  
5.8182  
5.8128  
5.8061  
5.8009  
5.7888  
5.7757  
5.5361  
5.2848  
5.2818  
5.2636  
5.2592  
5.2550  
5.2418  
5.2383  
5.2341  
4.1222  
4.1081  
4.0951  
4.0901  
4.0790  
4.0630  
4.0302  
4.0144  
4.0031  
3.9986  
3.9873  
3.9715  
3.2087  
3.2028  
3.1989  
3.1782  
3.1712  
3.1654  
3.1594  
2.4369  
2.4133  
2.3863  
2.3757  
1.4419  
1.4389  
1.4288  
1.4204  
1.4126  
1.4084  
1.3870  
1.3847  
1.1335  
1.1144  
1.1081  
1.0856  
1.0861  
1.0772  
1.0703  
0.7977  
0.7794  
0.7609

<sup>1</sup>H NMR HZ-5-70B in CDCl<sub>3</sub>

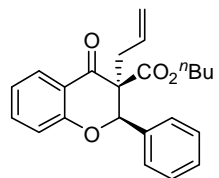

**8d** <sup>1</sup>H NMR (400 MHz, CDCl<sub>3</sub>)

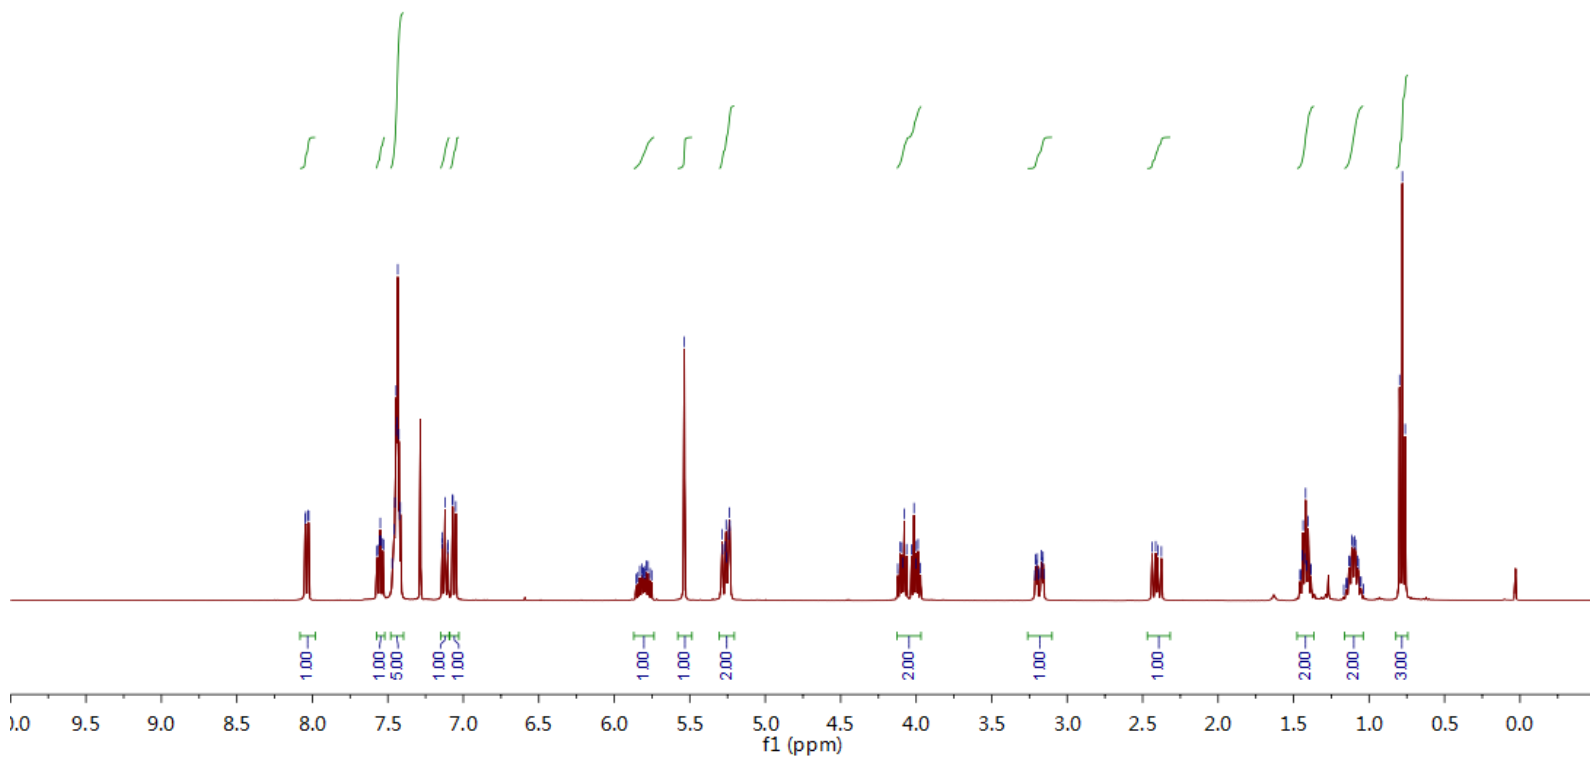

<sup>13</sup>C NMR HZ-5-70B in CDCl<sub>3</sub>

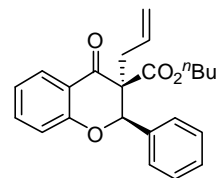

**8d** <sup>13</sup>C NMR (100 MHz, CDCl<sub>3</sub>)

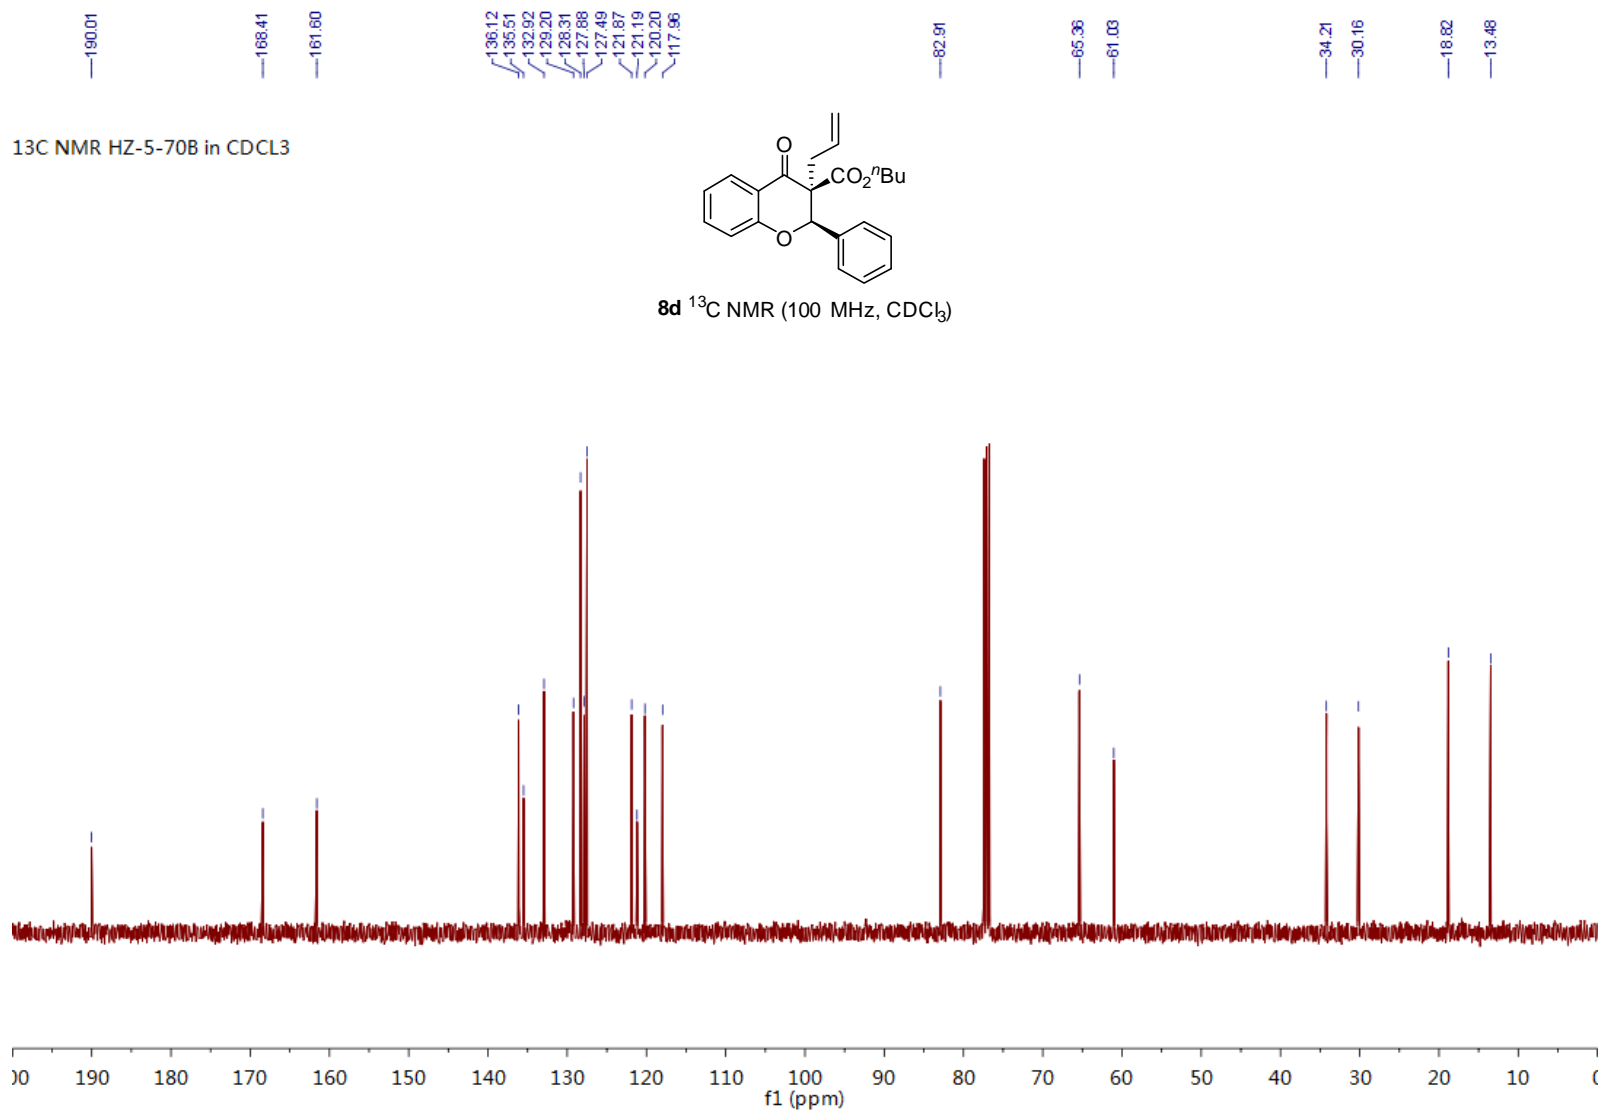

<sup>1</sup>H NMR HZ-5-70C in CDCl<sub>3</sub>

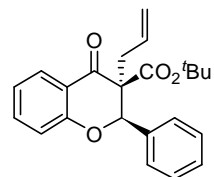

**8e** <sup>1</sup>H NMR (400 MHz, CDCl<sub>3</sub>)

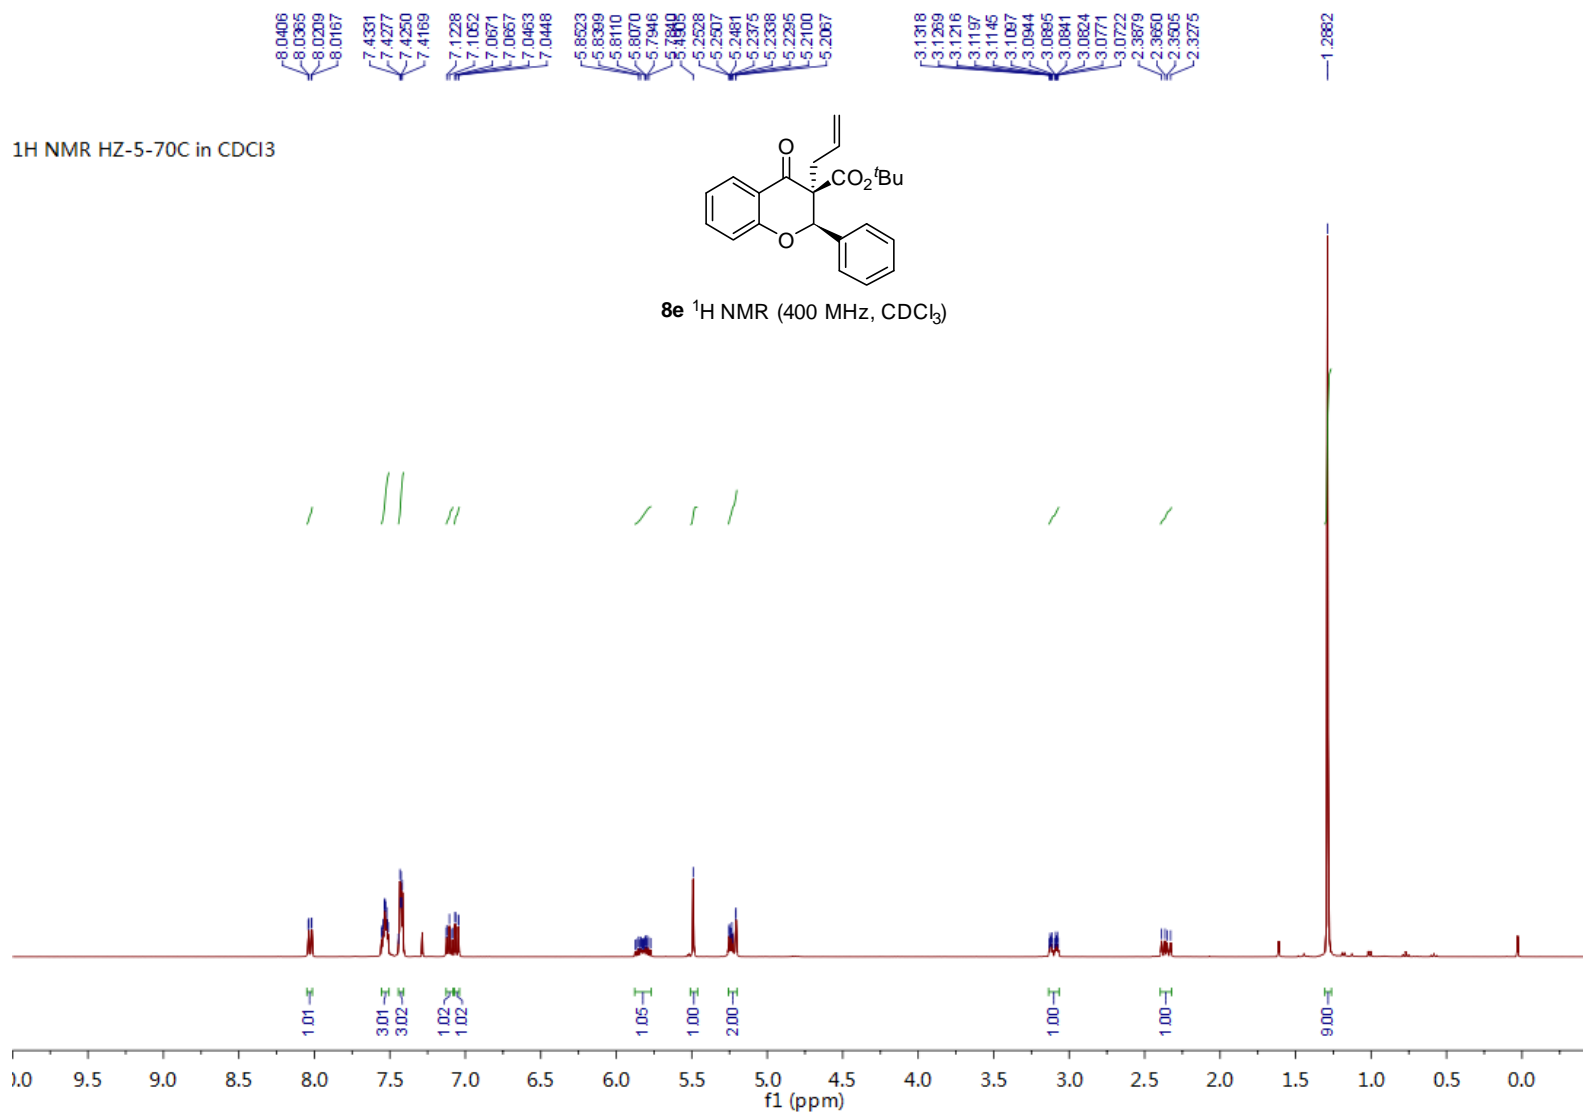



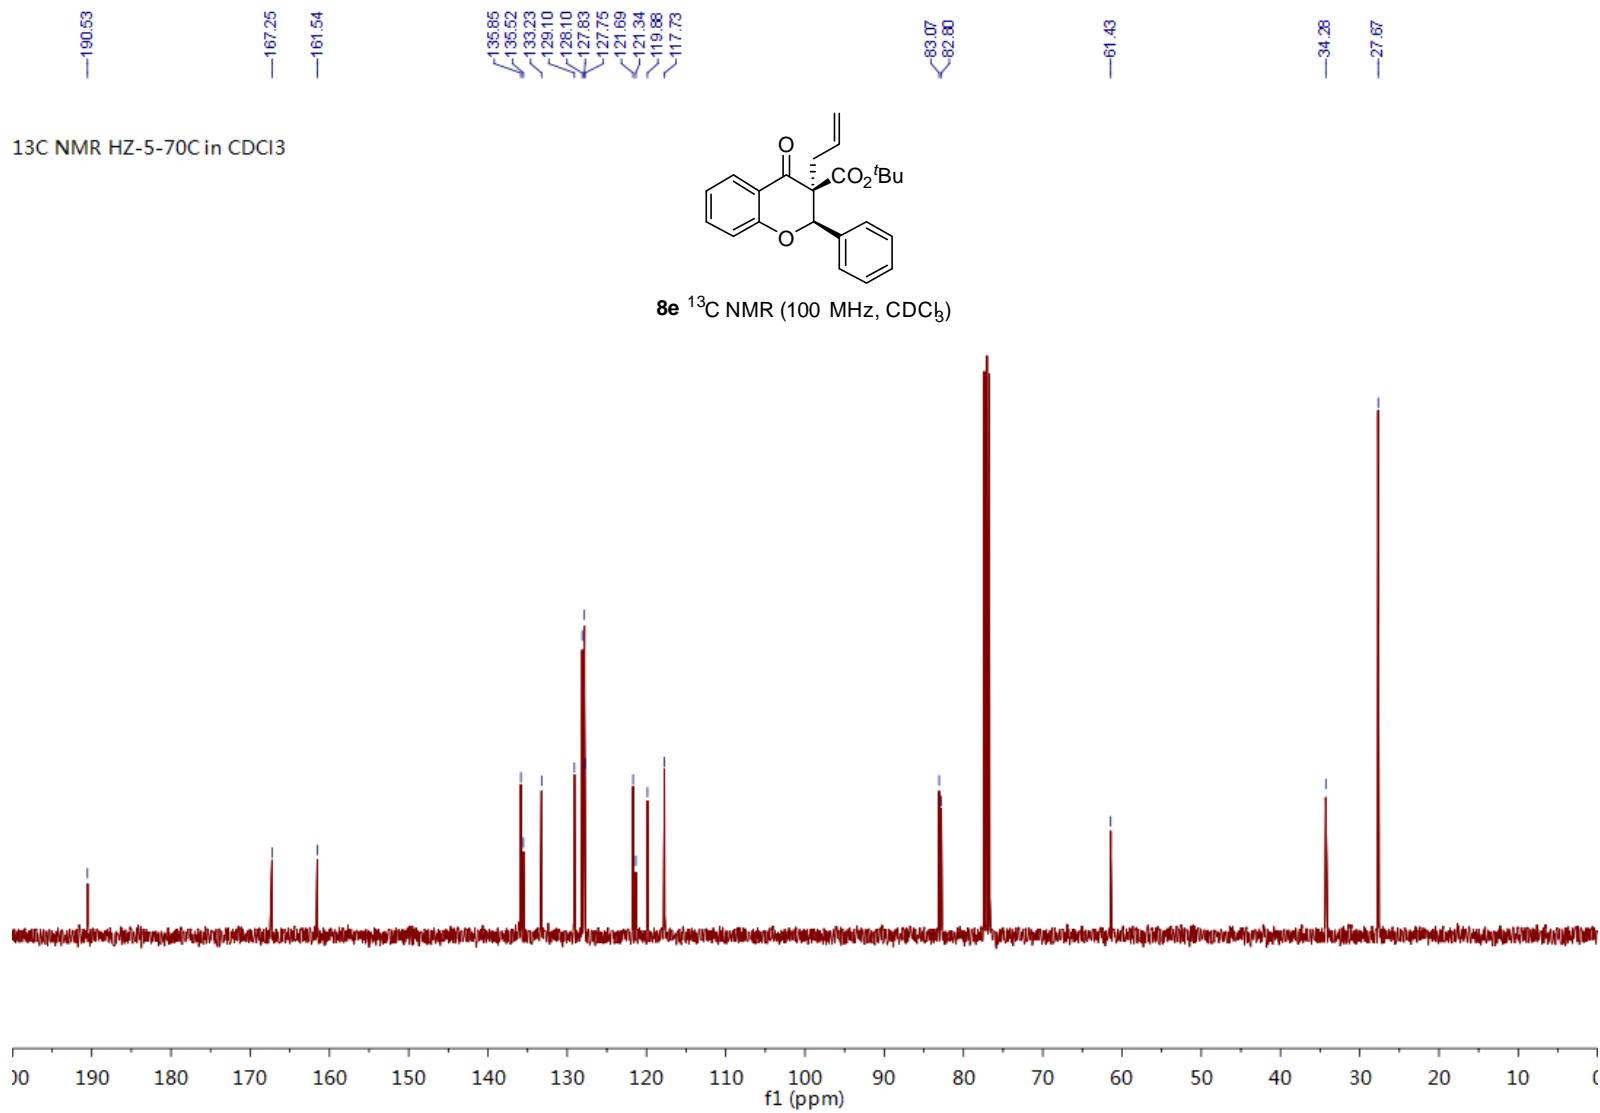

<sup>1</sup>H NMR HZ-5-61A in CDCl<sub>3</sub>

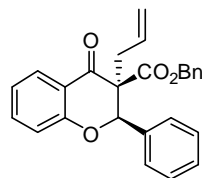

**8f** <sup>1</sup>H NMR (400 MHz, CDCl<sub>3</sub>)

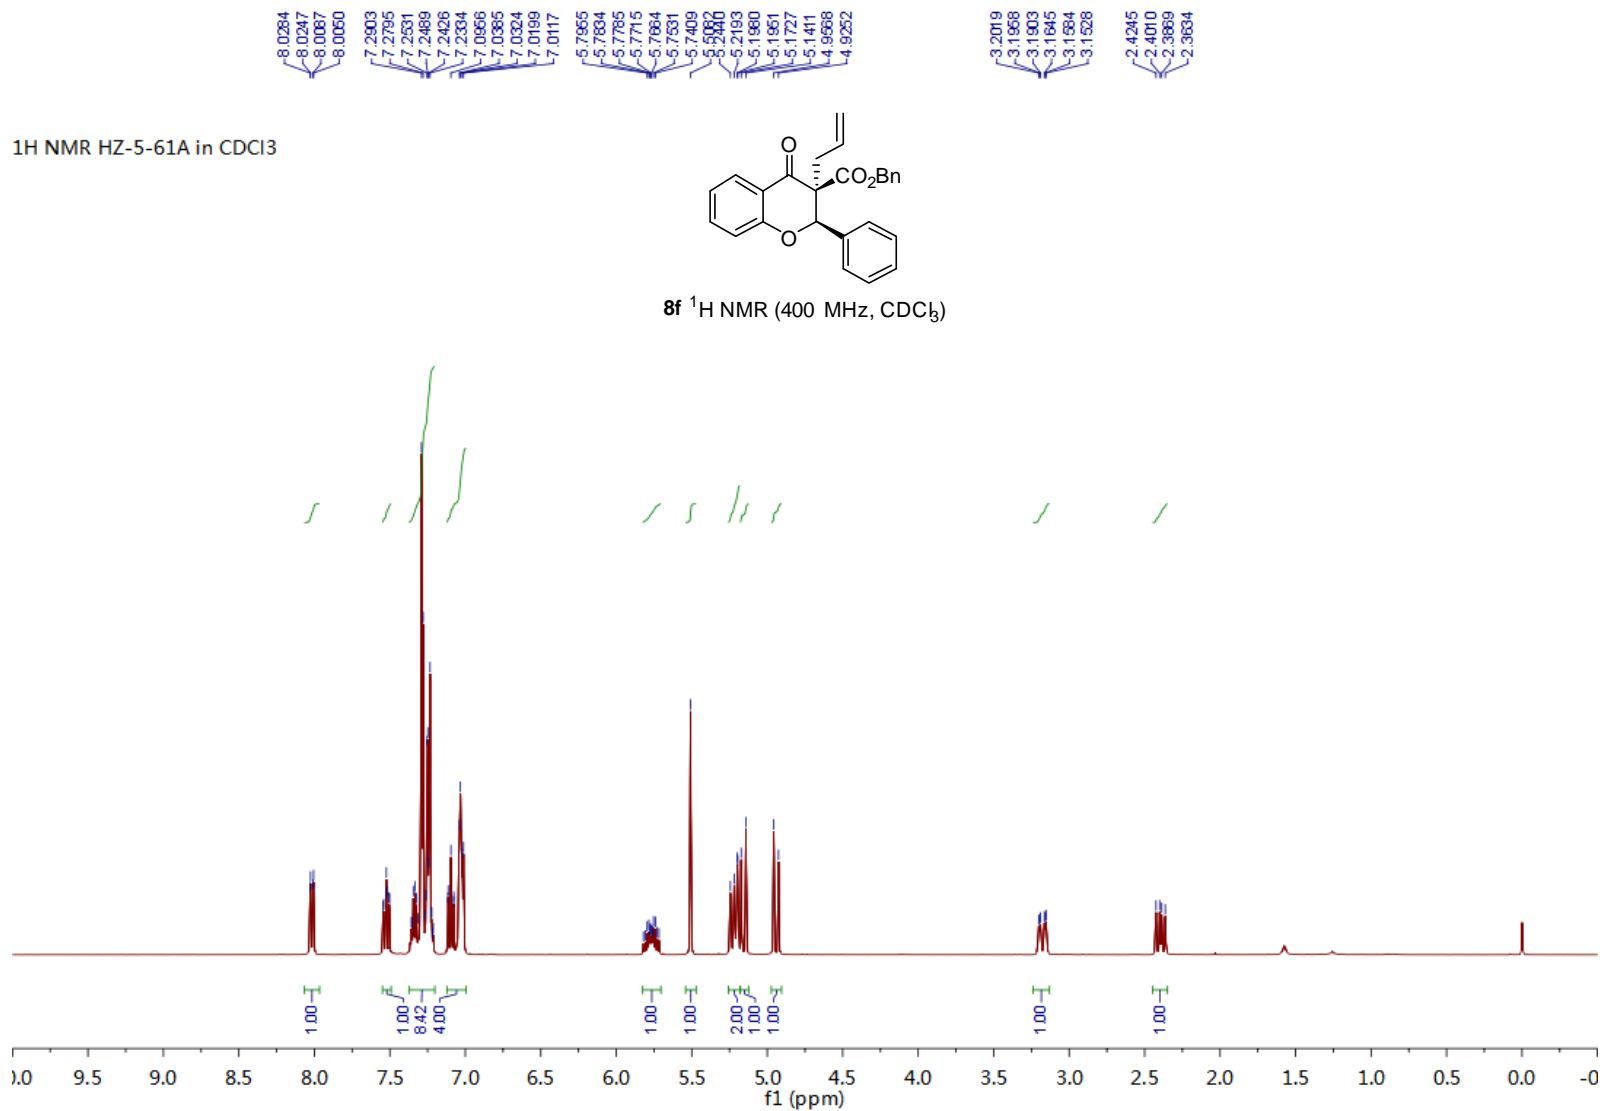

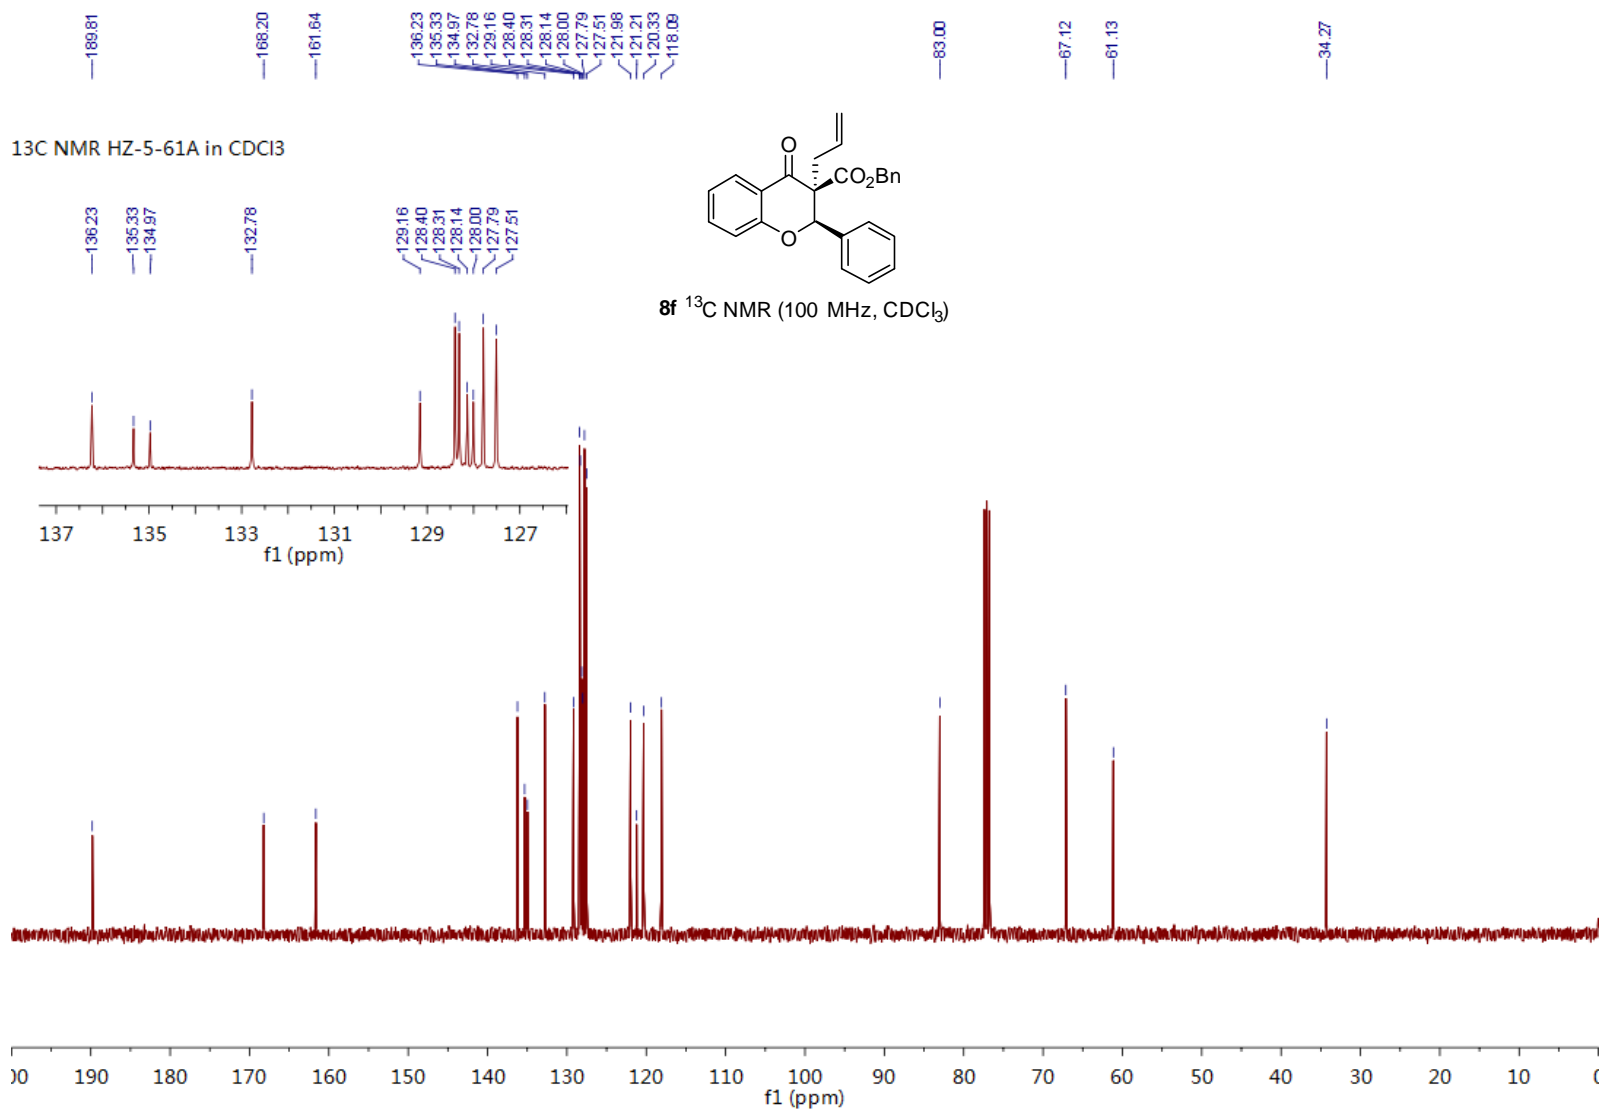

<sup>1</sup>H NMR HZ-5-62B in CDCl<sub>3</sub>

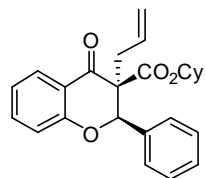

**8g** <sup>1</sup>H NMR (400 MHz, CDCl<sub>3</sub>)

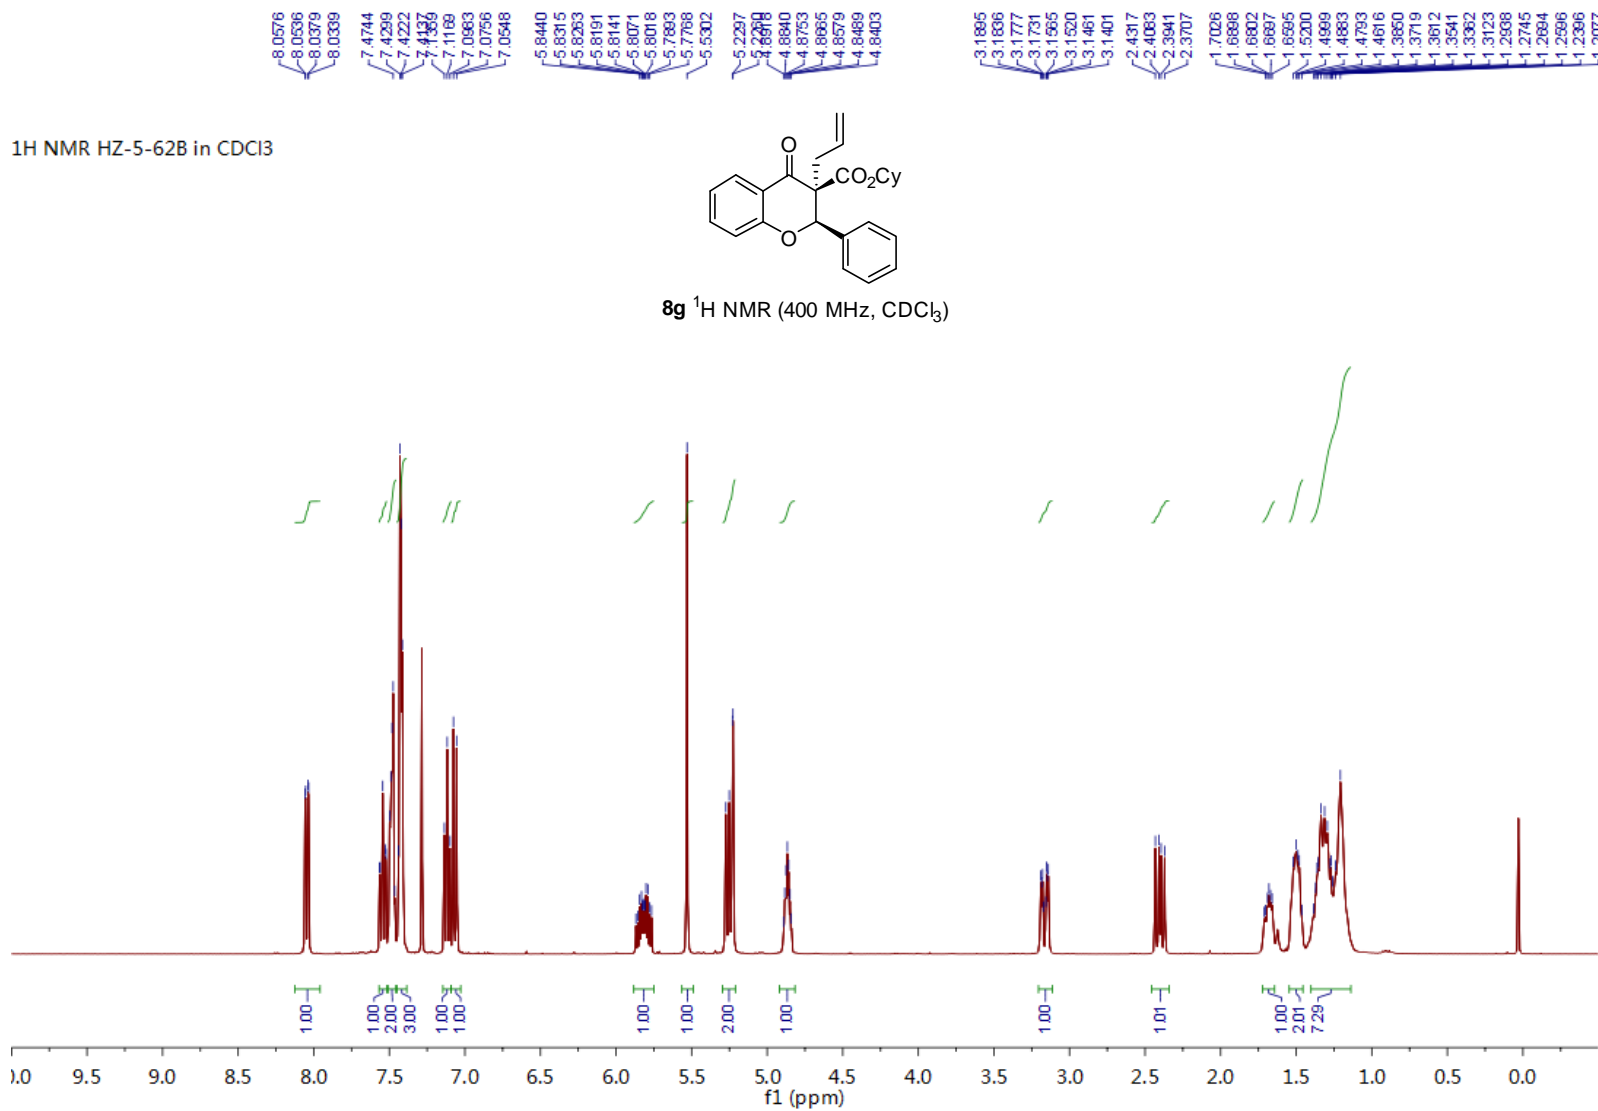

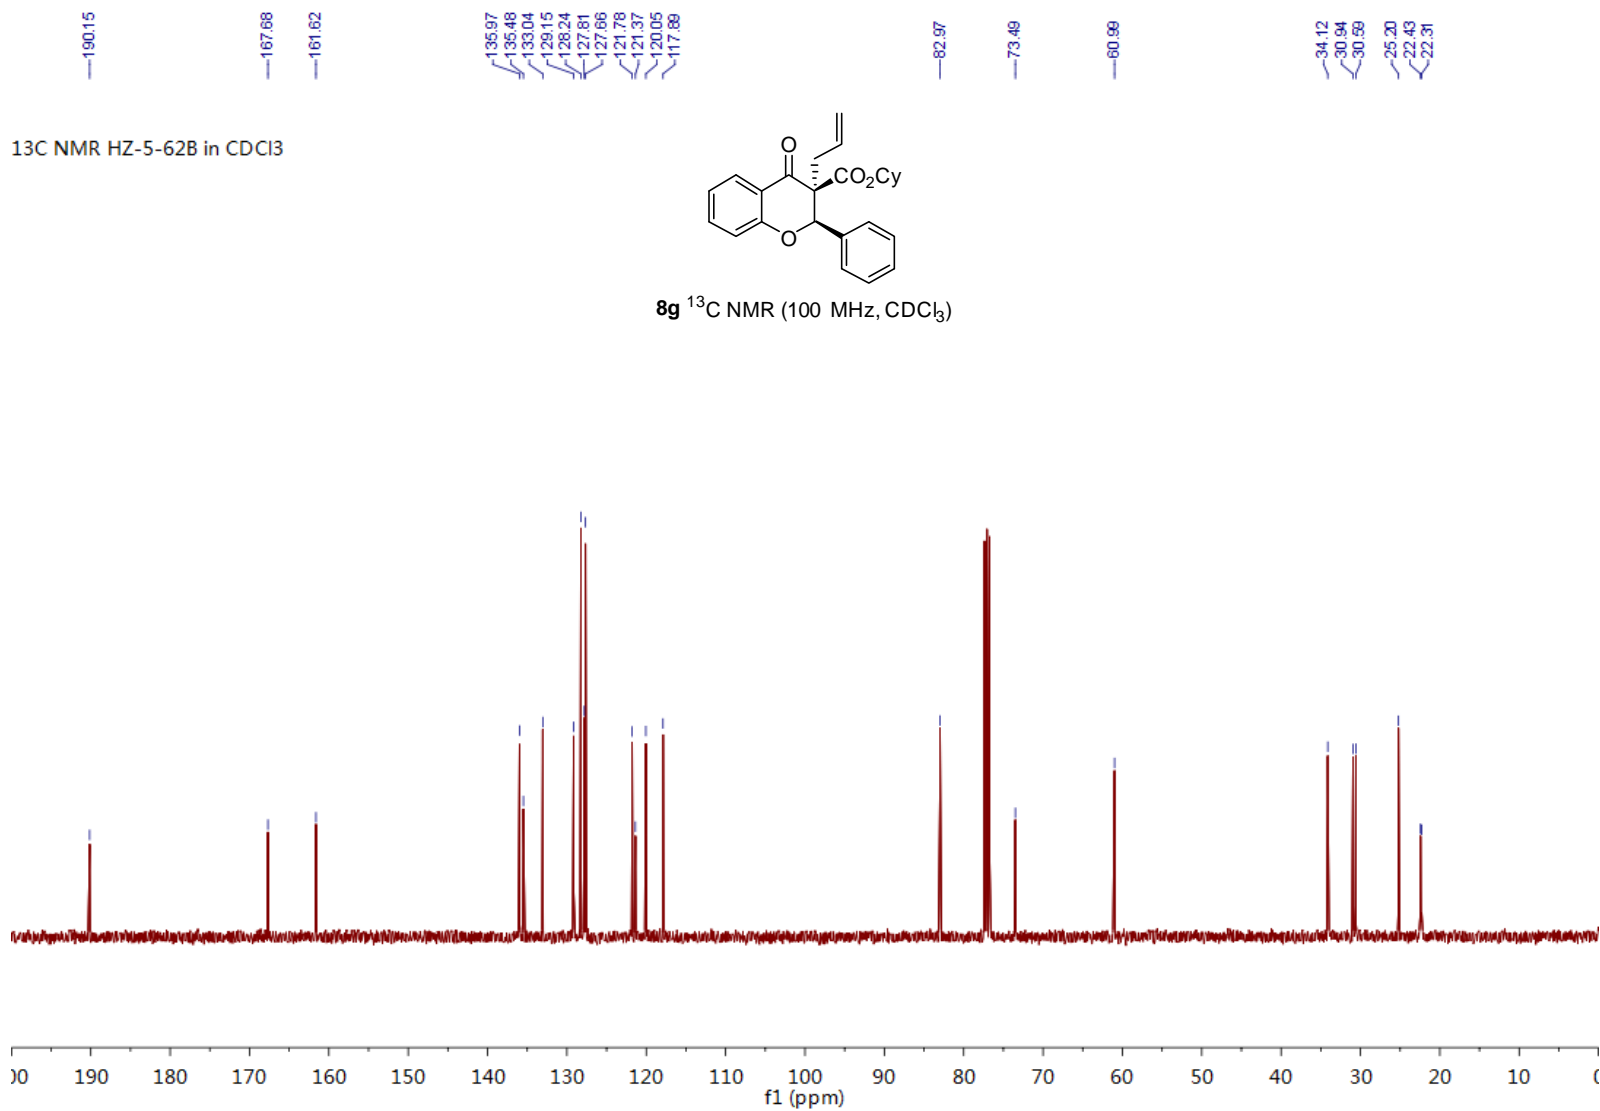

<sup>1</sup>H NMR HZ-5-81A in CDCl<sub>3</sub>

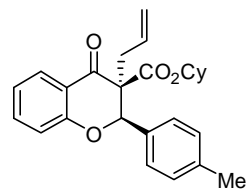

8h <sup>1</sup>H NMR (400 MHz, CDCl<sub>3</sub>)

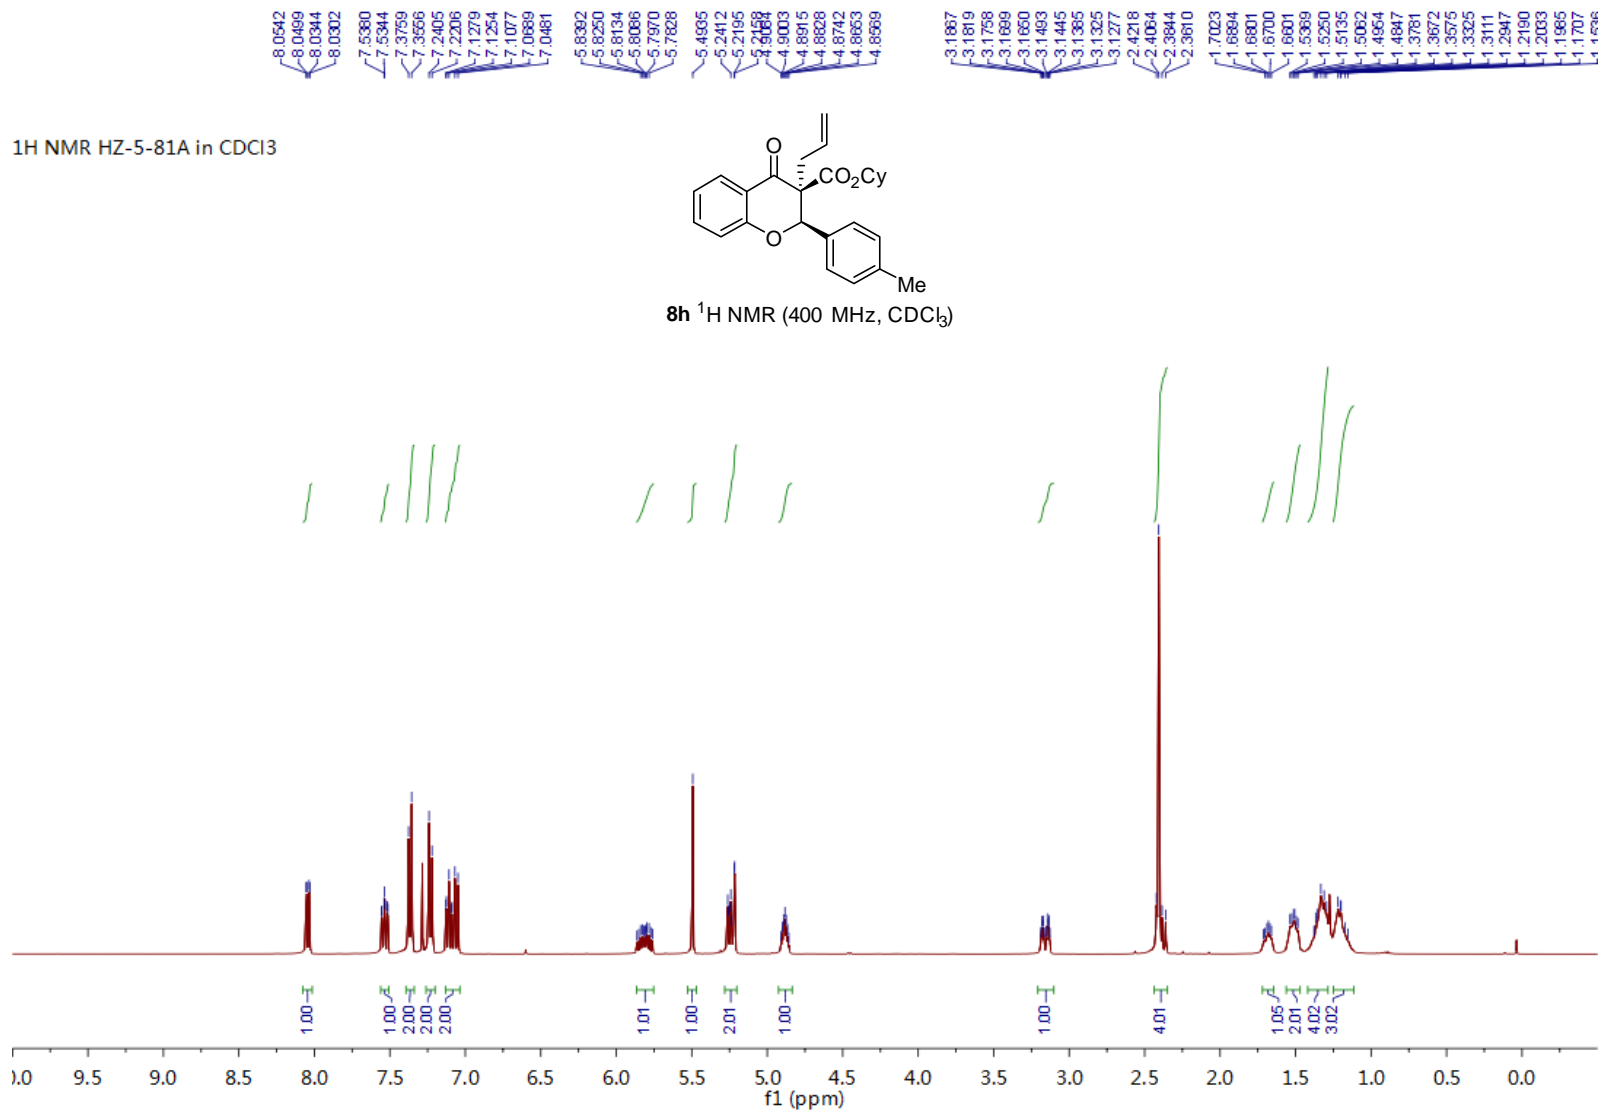

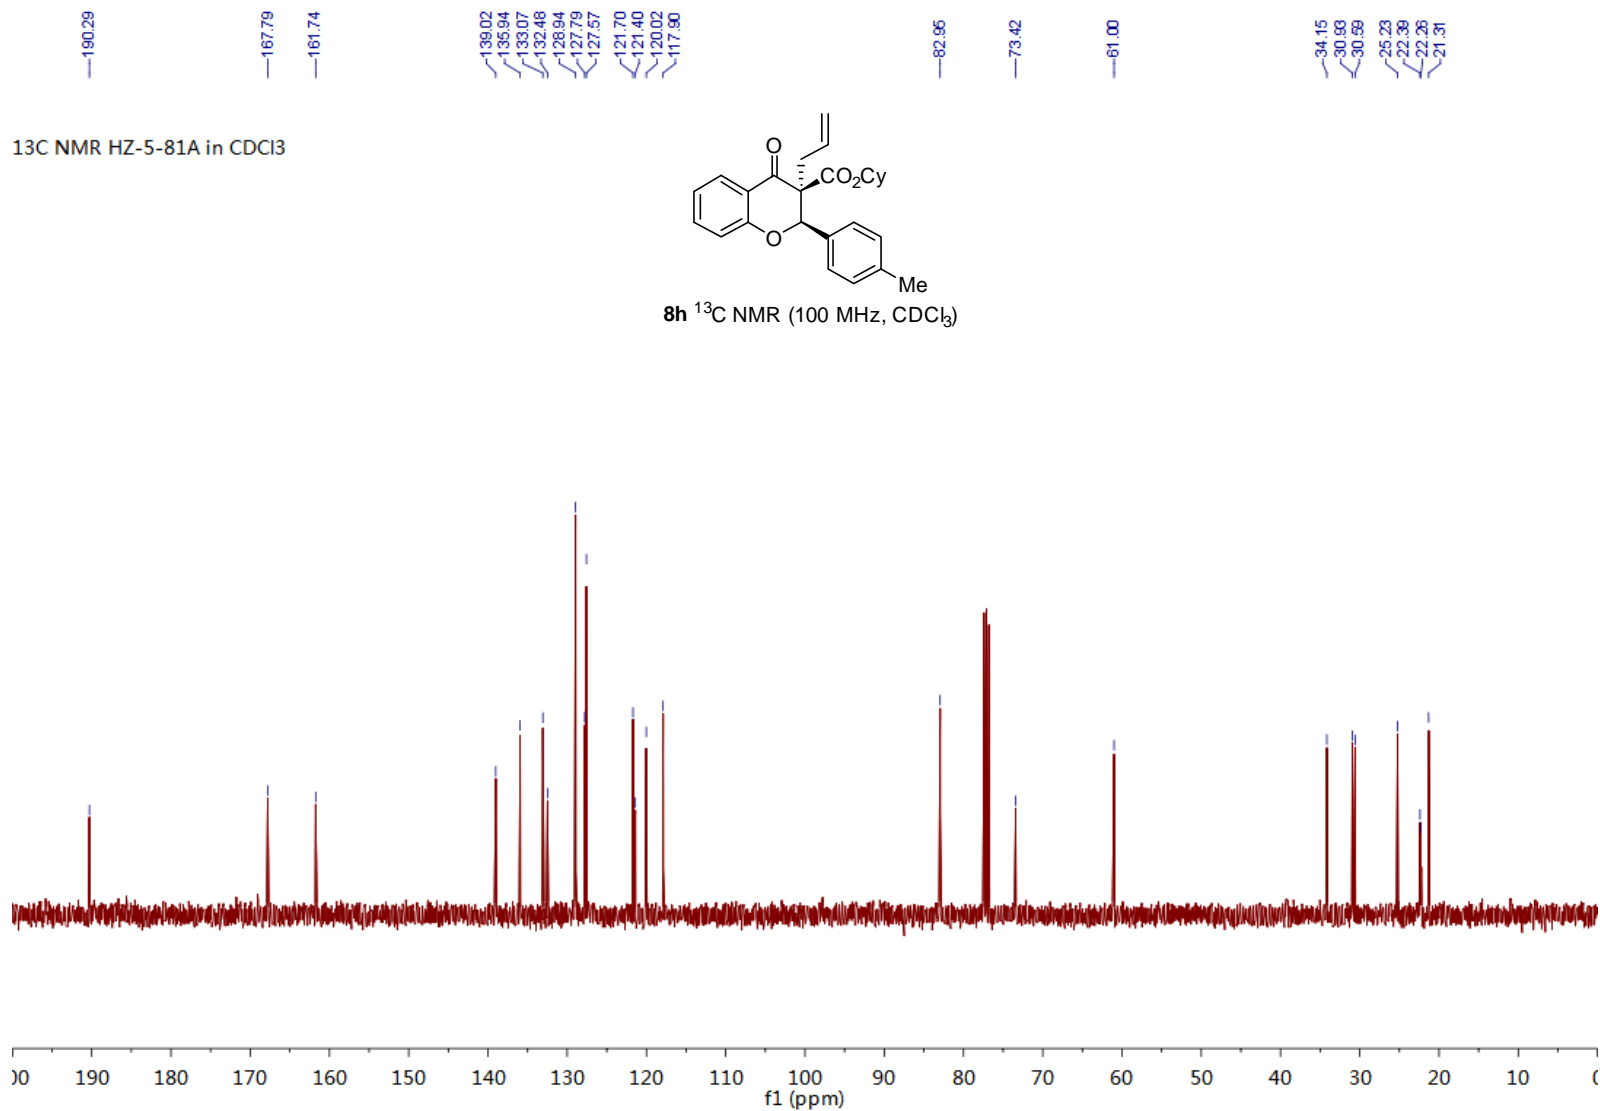

8.0533  
8.0491  
8.0336  
8.0294  
7.5645  
7.5601  
7.5464  
7.5429  
7.5394  
7.5257  
7.5213  
7.3284  
7.3069  
7.2916  
7.2842  
7.2757  
7.2563  
7.2386  
7.2210  
7.1329  
7.1305  
7.1126  
7.0952  
7.0928  
7.0814  
7.0607  
5.8388  
5.8279  
5.8245  
5.8099  
5.7980  
5.7949  
5.7867  
5.7831  
5.7714  
5.4975  
5.2724  
5.2692  
5.2596  
5.2543  
5.2315  
5.2276  
4.8807  
4.8720  
4.8632  
4.8546  
4.8457  
3.2006  
3.1957  
3.1887  
3.1838  
3.1808  
3.1631  
3.1592  
3.1523  
3.1463  
3.1414  
2.4279  
2.3888  
2.3688  
1.7084  
1.6990  
1.6881  
1.6778  
1.6587  
1.6500  
1.6281  
1.6164  
1.4961  
1.4821  
1.4742  
1.4092  
1.4000  
1.3759  
1.3632  
1.3549  
1.3440  
1.3362  
1.3203  
1.3119  
1.3022  
1.2900  
1.2707  
1.2589  
1.2437  
1.2191  
1.2032  
1.1786

<sup>1</sup>H NMR HZ-5-82B in CDCl<sub>3</sub>

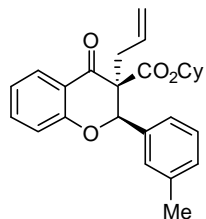

**8i** <sup>1</sup>H NMR (400 MHz, CDCl<sub>3</sub>)

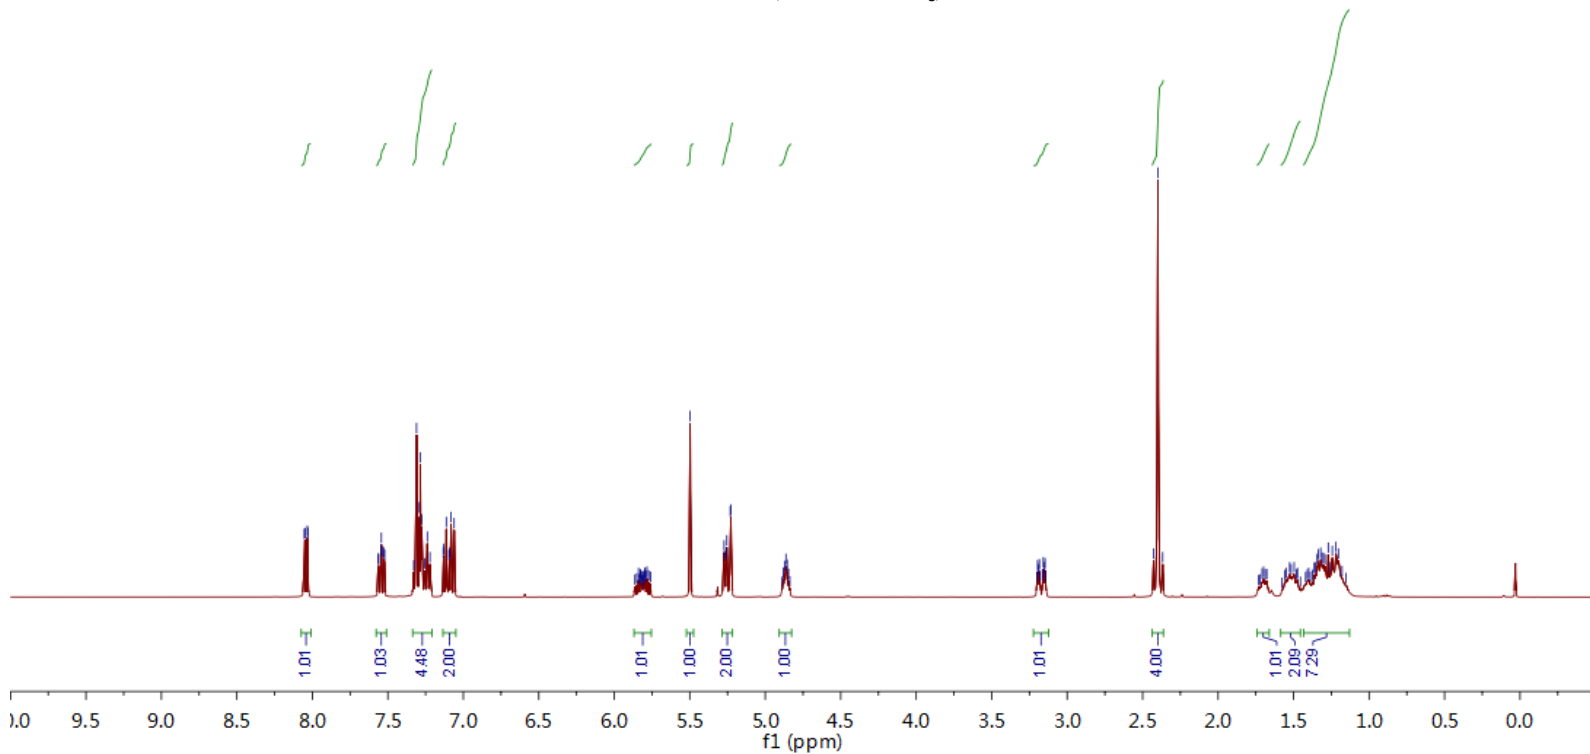



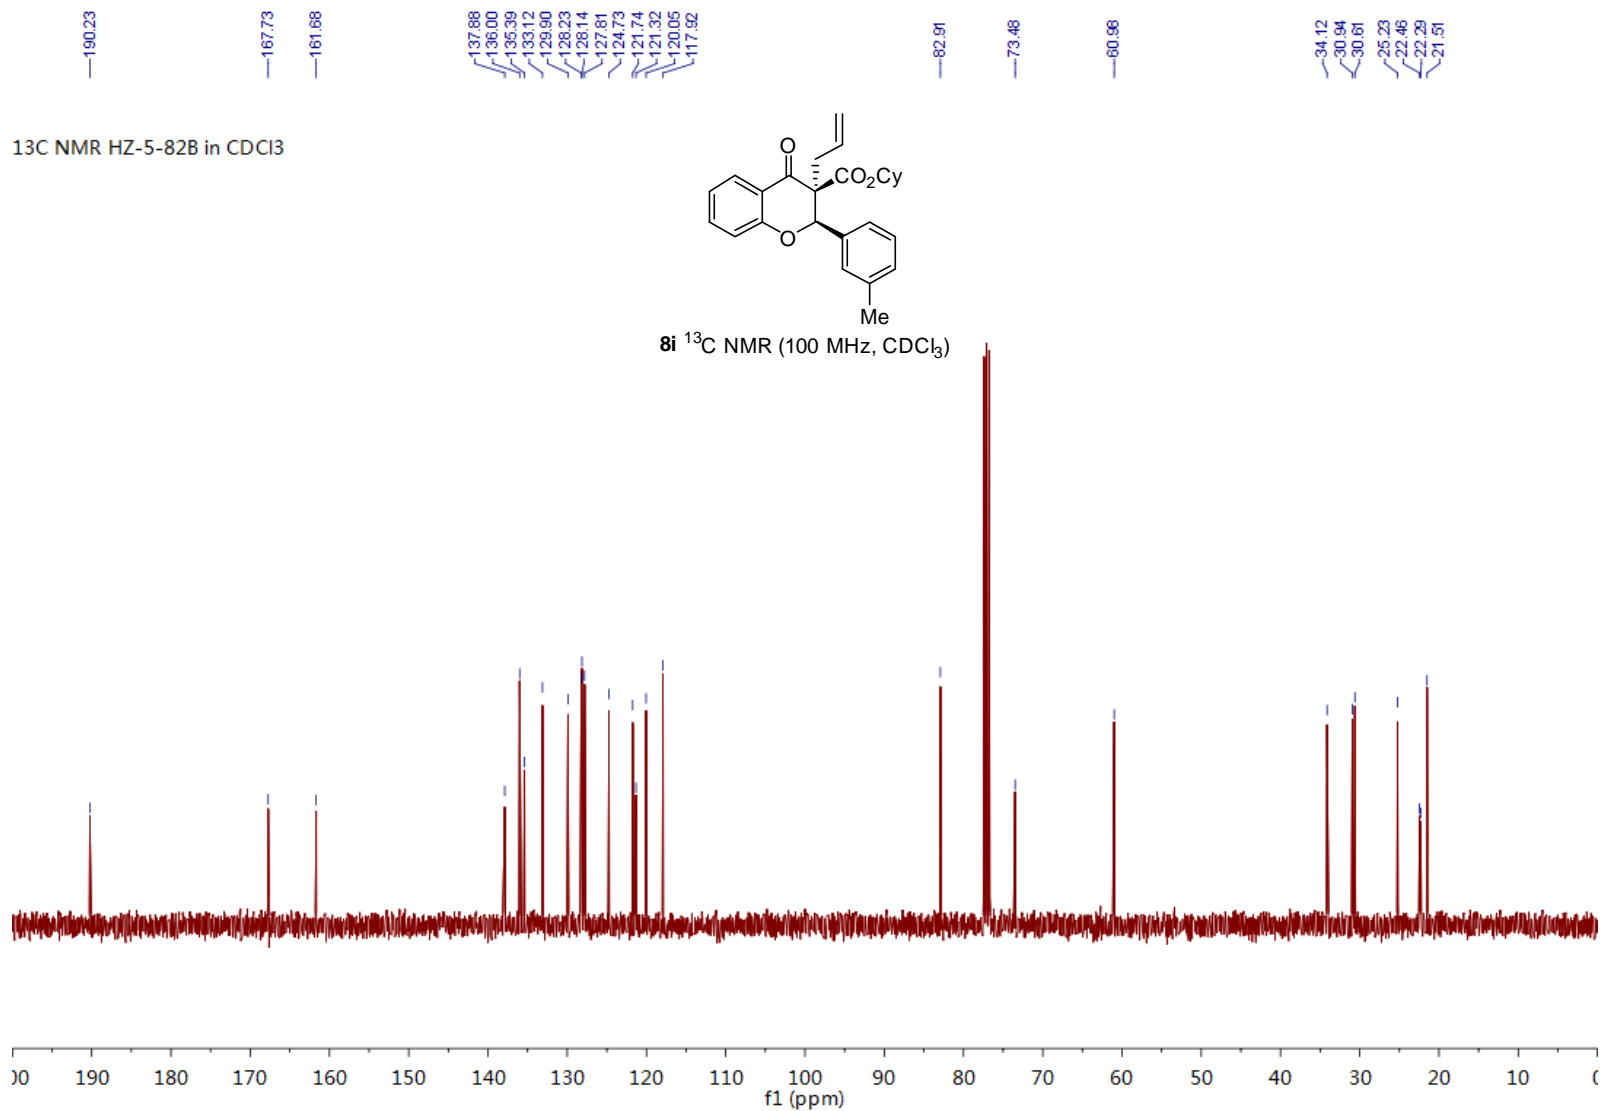

<sup>1</sup>H NMR HZ-5-89A in CDCl<sub>3</sub>

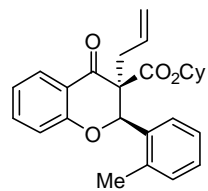

8j <sup>1</sup>H NMR (400 MHz, CDCl<sub>3</sub>)

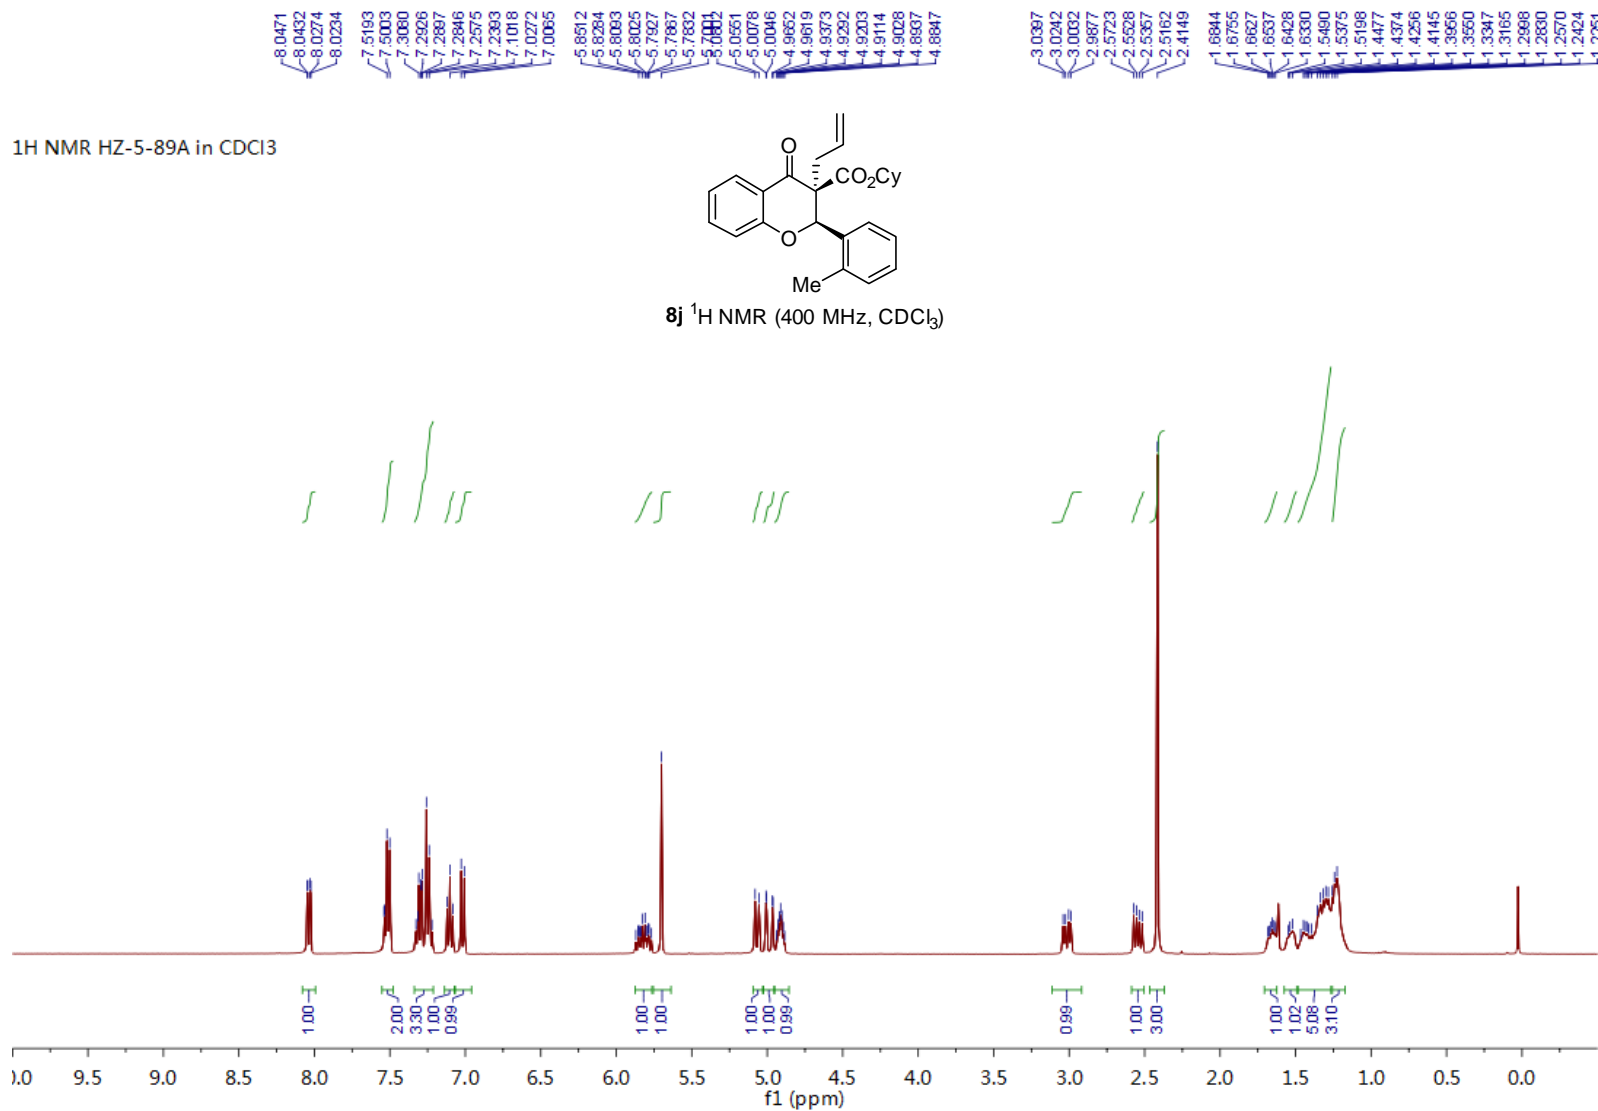

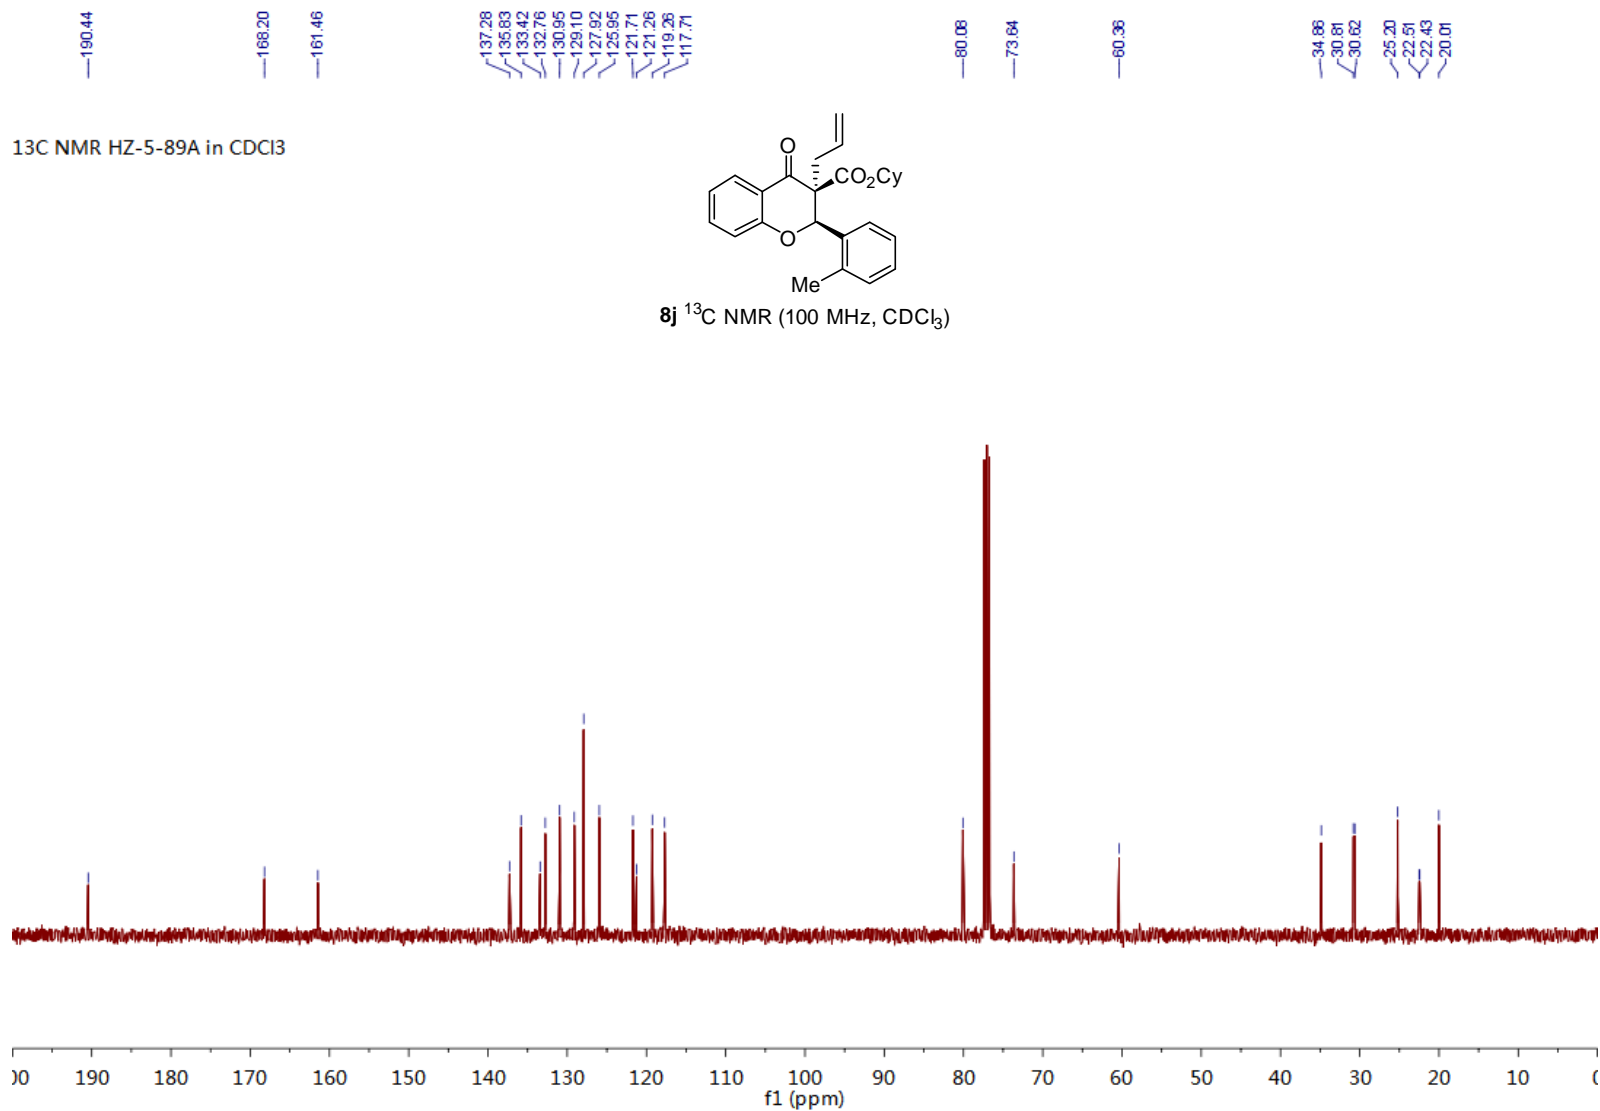

8.0664  
8.0914  
8.0757  
8.0716  
7.9756  
7.9219  
7.9111  
7.9004  
7.8875  
7.8738  
7.8609  
7.8583  
7.8601  
7.8165  
7.8122  
7.5951  
7.5904  
7.5868  
7.5721  
7.5679  
7.5649  
7.5606  
7.5551  
7.5508  
7.5471  
7.5427  
7.5371  
7.1640  
7.1616  
7.1439  
7.1263  
7.1238  
7.1174  
7.0967  
5.9063  
5.8974  
5.8861  
5.8831  
5.7049  
5.3252  
5.3221  
5.3152  
5.3111  
5.2861  
5.2825  
4.9163  
4.9074  
4.8966  
4.8900  
4.8810  
3.2270  
3.2210  
3.2152  
3.1895  
3.1836  
3.1776  
2.4807  
2.4571  
2.4430  
2.4194  
2.4194  
1.7397  
1.7299  
1.7190  
1.7089  
1.6813  
1.6870  
1.4864  
1.4757  
1.4672  
1.4295  
1.4196  
1.3750  
1.3659  
1.3662  
1.3395  
1.3236  
1.3144  
1.3048  
1.2942  
1.2745  
1.2575  
1.2259  
1.2125  
1.1960  
1.1889  
1.1793  
1.1629

<sup>1</sup>H NMR HZ-5-82C in CDCl<sub>3</sub>

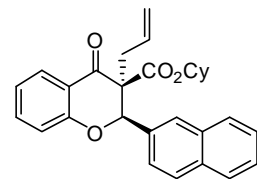

**8k** <sup>1</sup>H NMR (400 MHz, CDCl<sub>3</sub>)

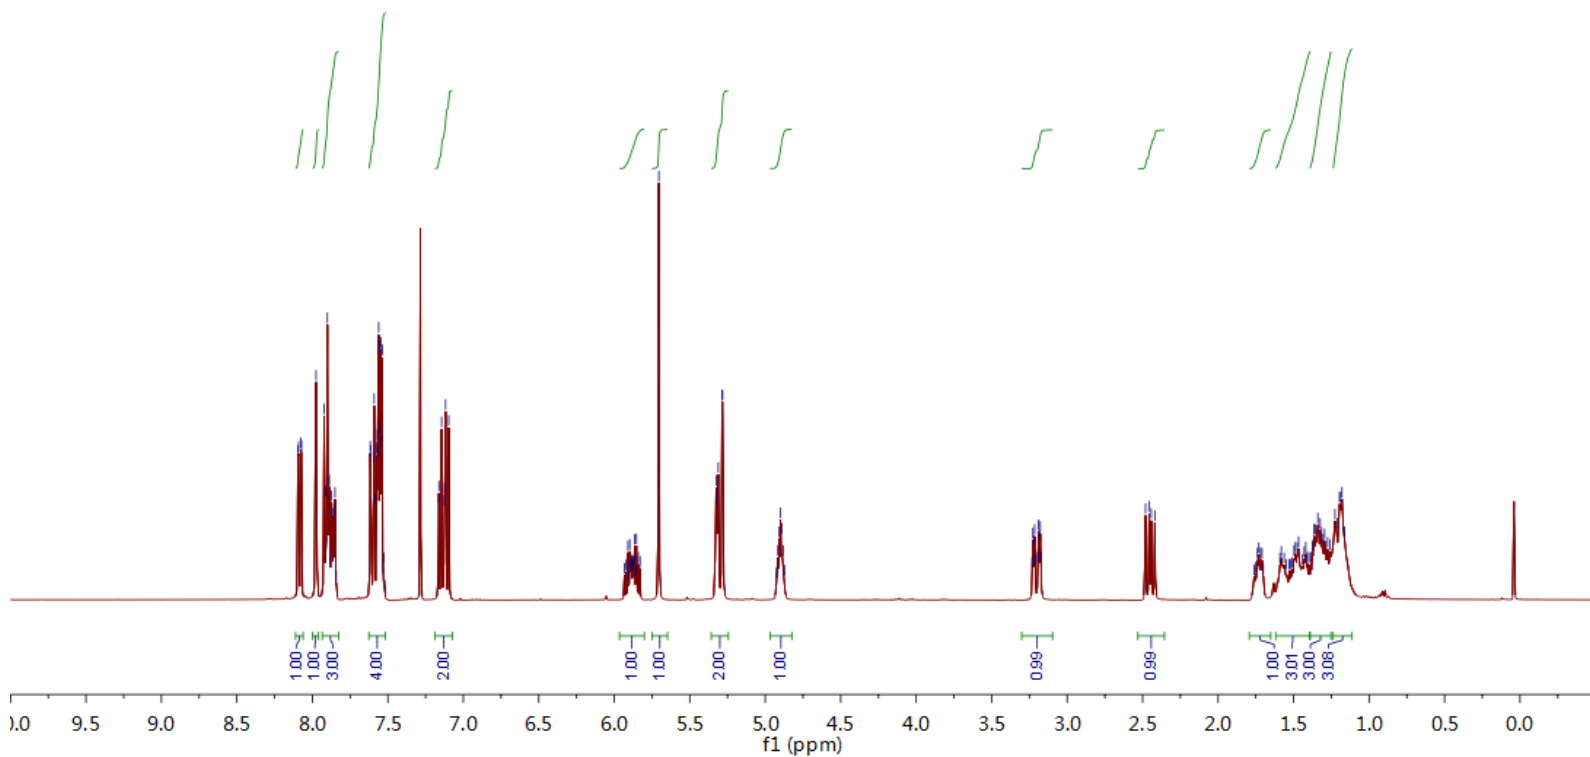

13C NMR HZ-5-82C in CDCl3

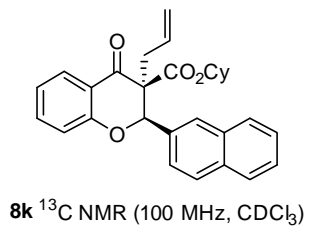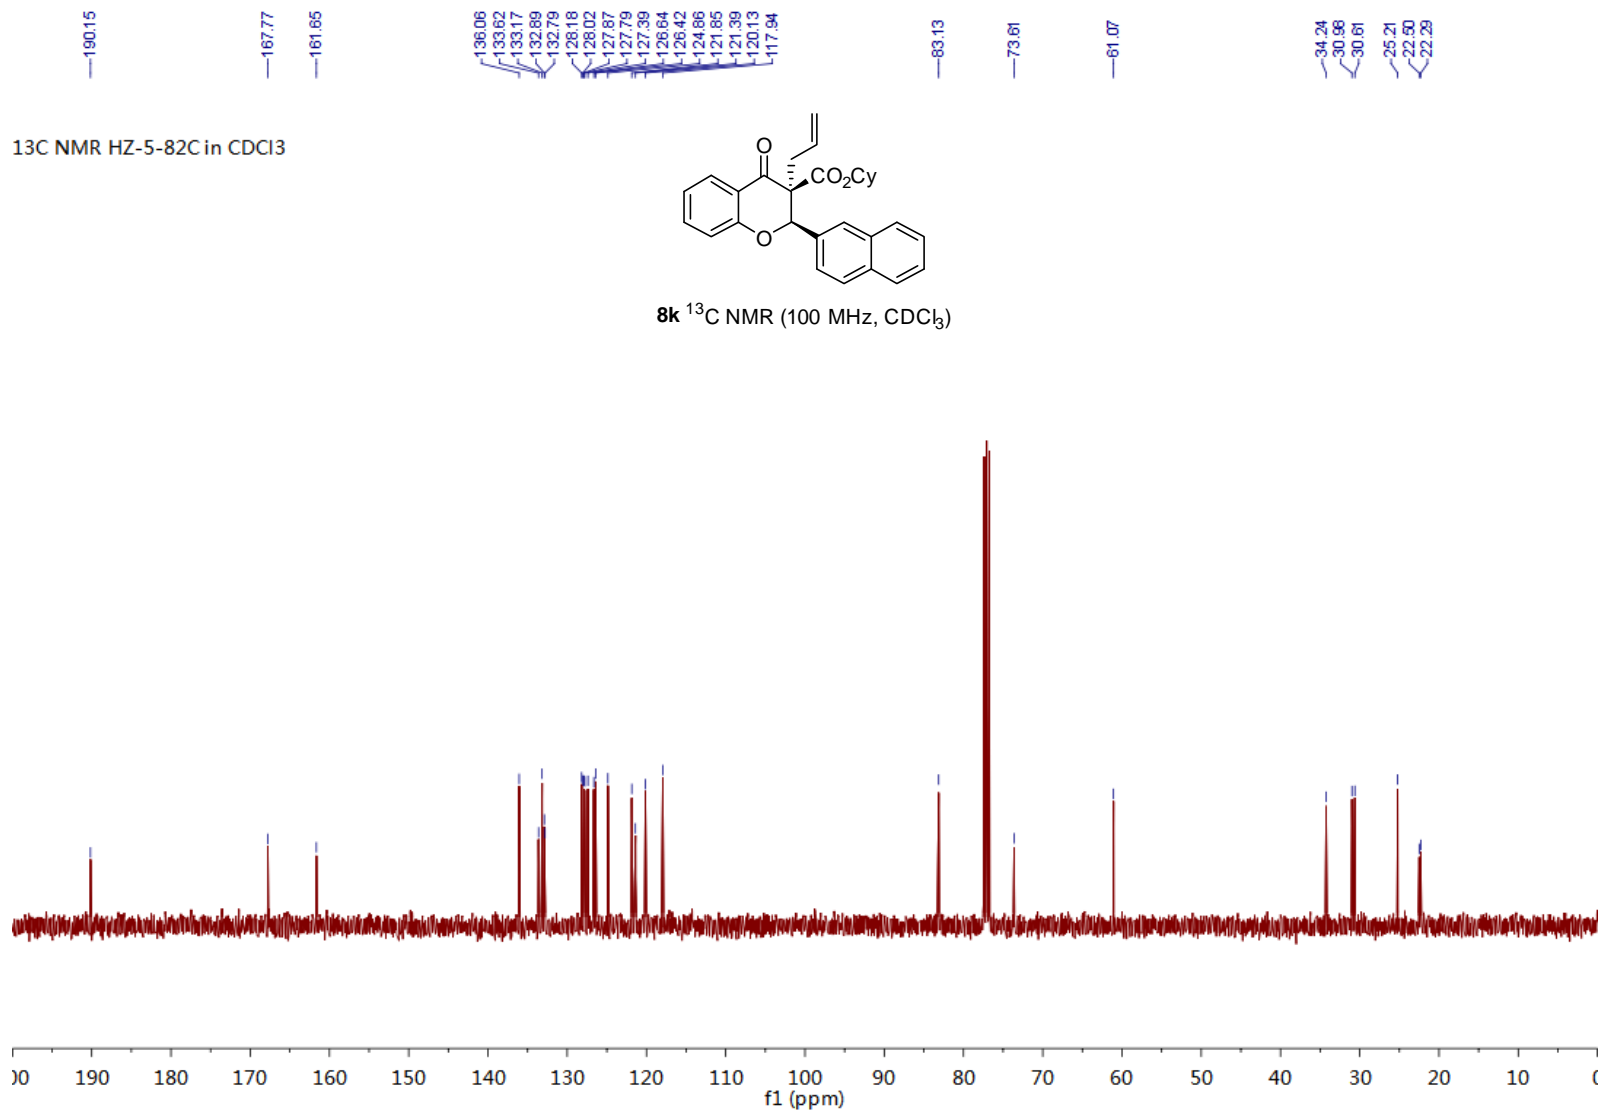

8.0514  
8.0473  
8.0317  
8.0276  
7.9978  
7.9634  
7.9487  
7.9466  
7.9426  
7.9289  
7.9246  
7.8821  
7.8769  
7.8687  
7.8645  
7.8603  
7.8521  
7.8470  
7.8427  
7.8403  
7.8326  
7.8245  
7.8127  
7.8151  
7.8109  
7.8053  
7.8027  
7.8042  
7.8081  
7.8029  
7.8015  
7.8421  
7.8406  
5.8221  
5.8104  
5.8053  
5.7963  
5.7883  
5.7807  
5.7770  
5.7654  
5.7536  
5.7419  
5.5016  
5.2495  
5.2454  
5.2253  
5.2214  
5.2169  
5.2081  
5.2061  
4.8747  
4.8659  
4.8570  
4.8483  
4.8393  
3.1882  
3.1842  
3.1784  
3.1725  
3.1675  
3.1516  
3.1466  
3.1408  
3.1349  
3.1289  
2.9861  
2.9715  
2.9574  
2.9338  
1.6743  
1.6647  
1.6542  
1.6447  
1.6061  
1.4848  
1.4820  
1.3301  
1.3145  
1.2938  
1.2789  
1.2606  
1.2460  
1.2234  
1.2116  
1.2067  
1.1957

<sup>1</sup>H NMR HZ-5-97A in CDCl<sub>3</sub>

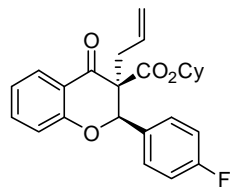

**8i** <sup>1</sup>H NMR (400 MHz, CDCl<sub>3</sub>)

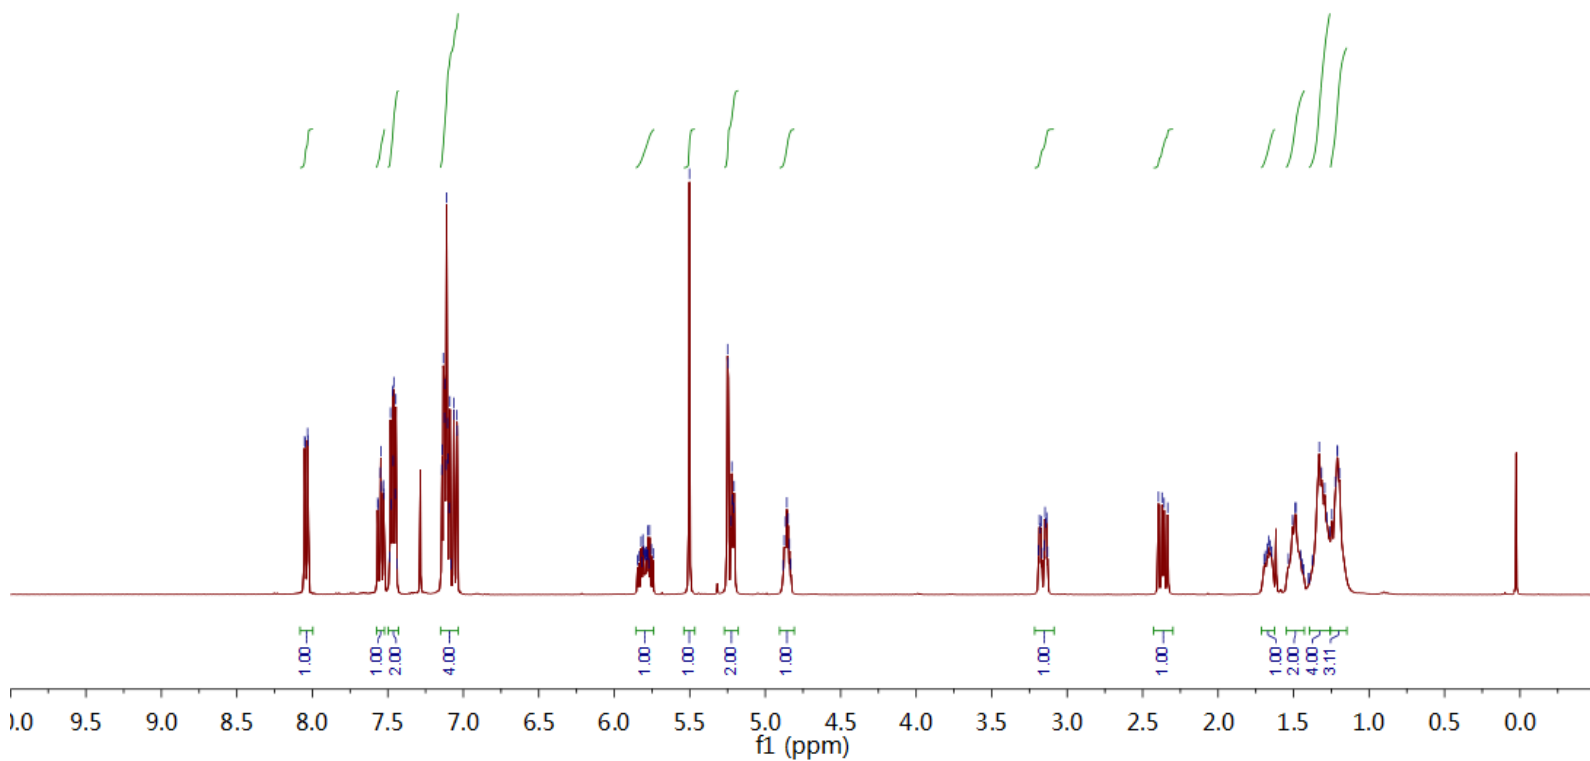

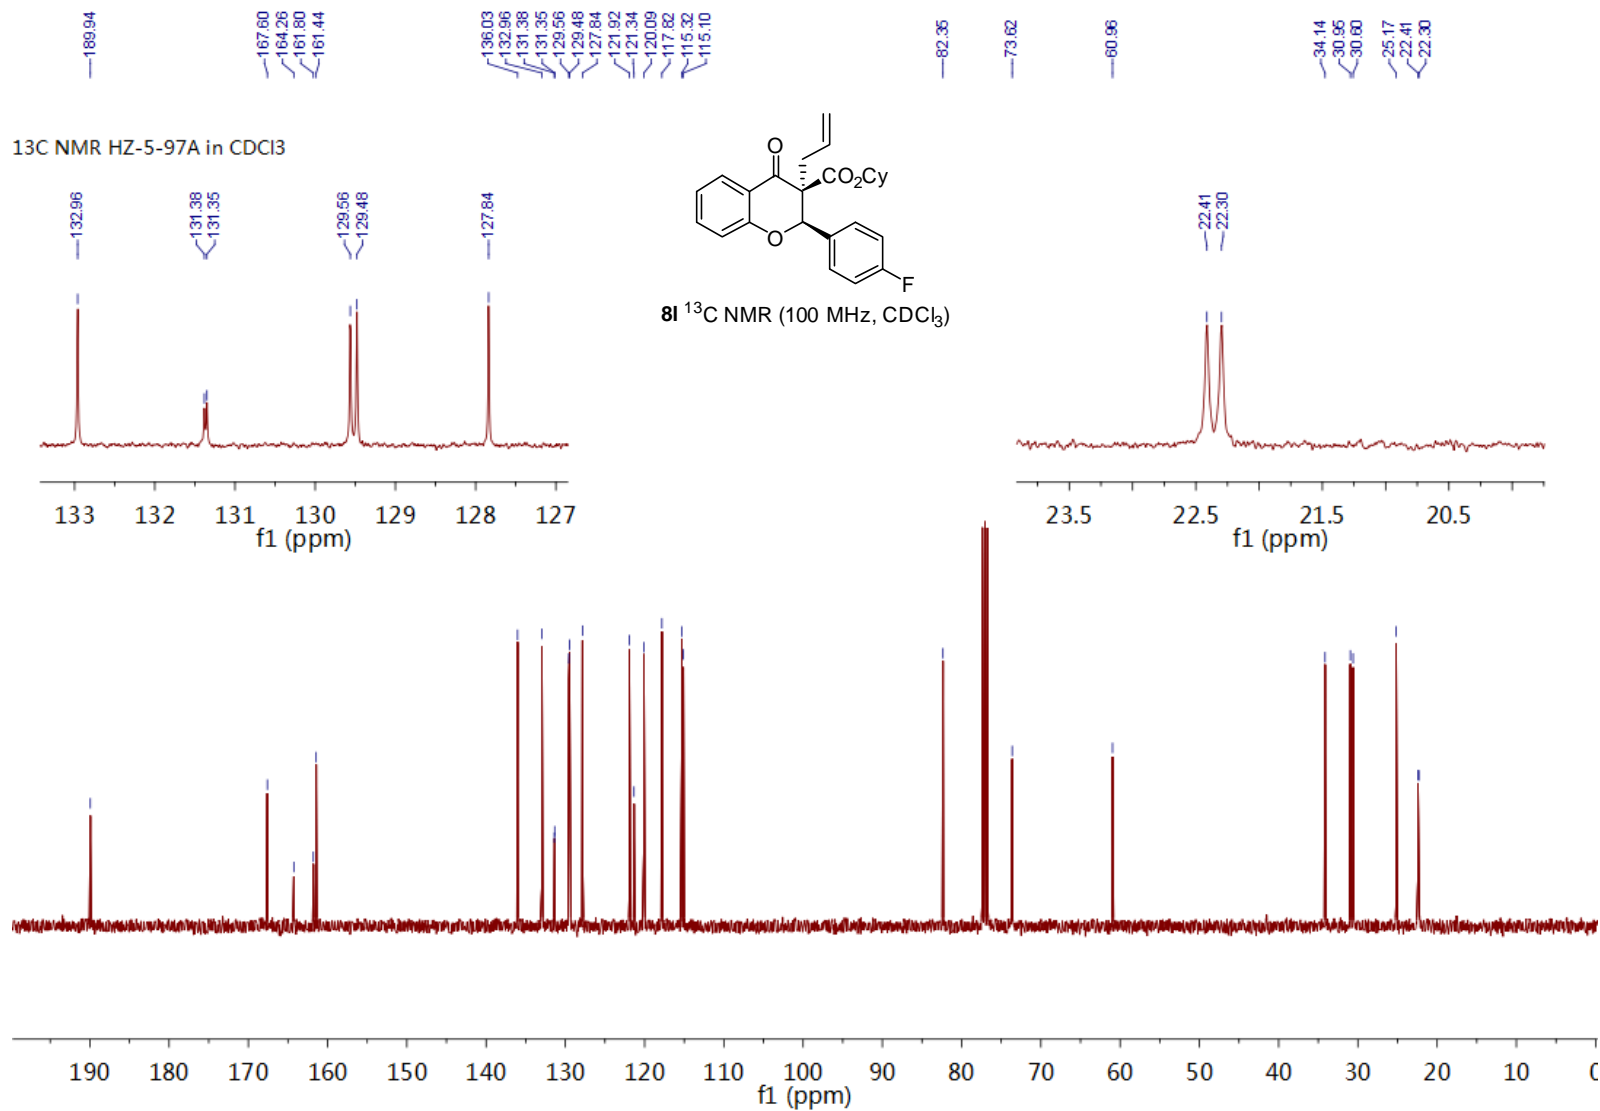

19F NMR HZ-5-97A in CDCl3

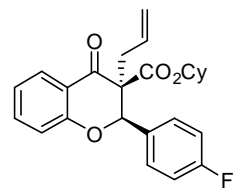

-112.2264

**81** <sup>19</sup>F NMR (376 MHz, CDCl<sub>3</sub>)

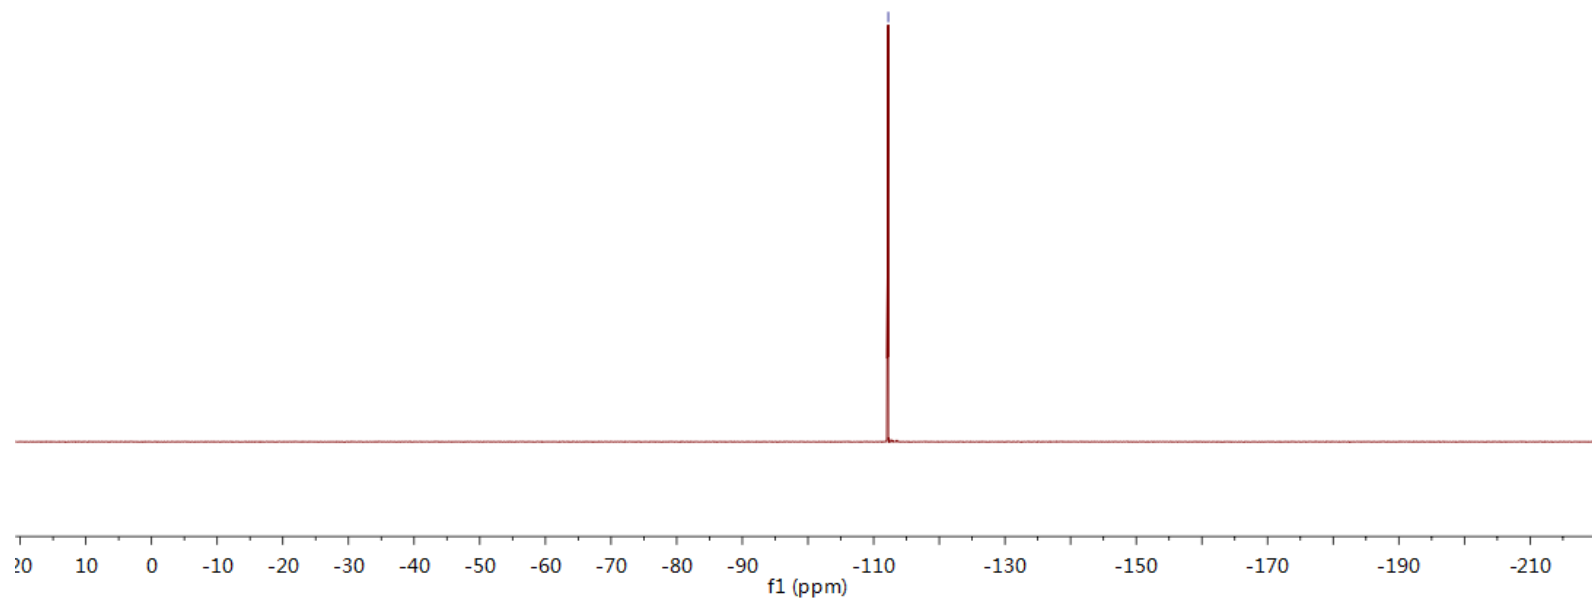

S111



<sup>1</sup>H NMR HZ-6-4 in CDCl<sub>3</sub>

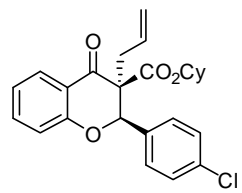

**8m** <sup>1</sup>H NMR (400 MHz, CDCl<sub>3</sub>)

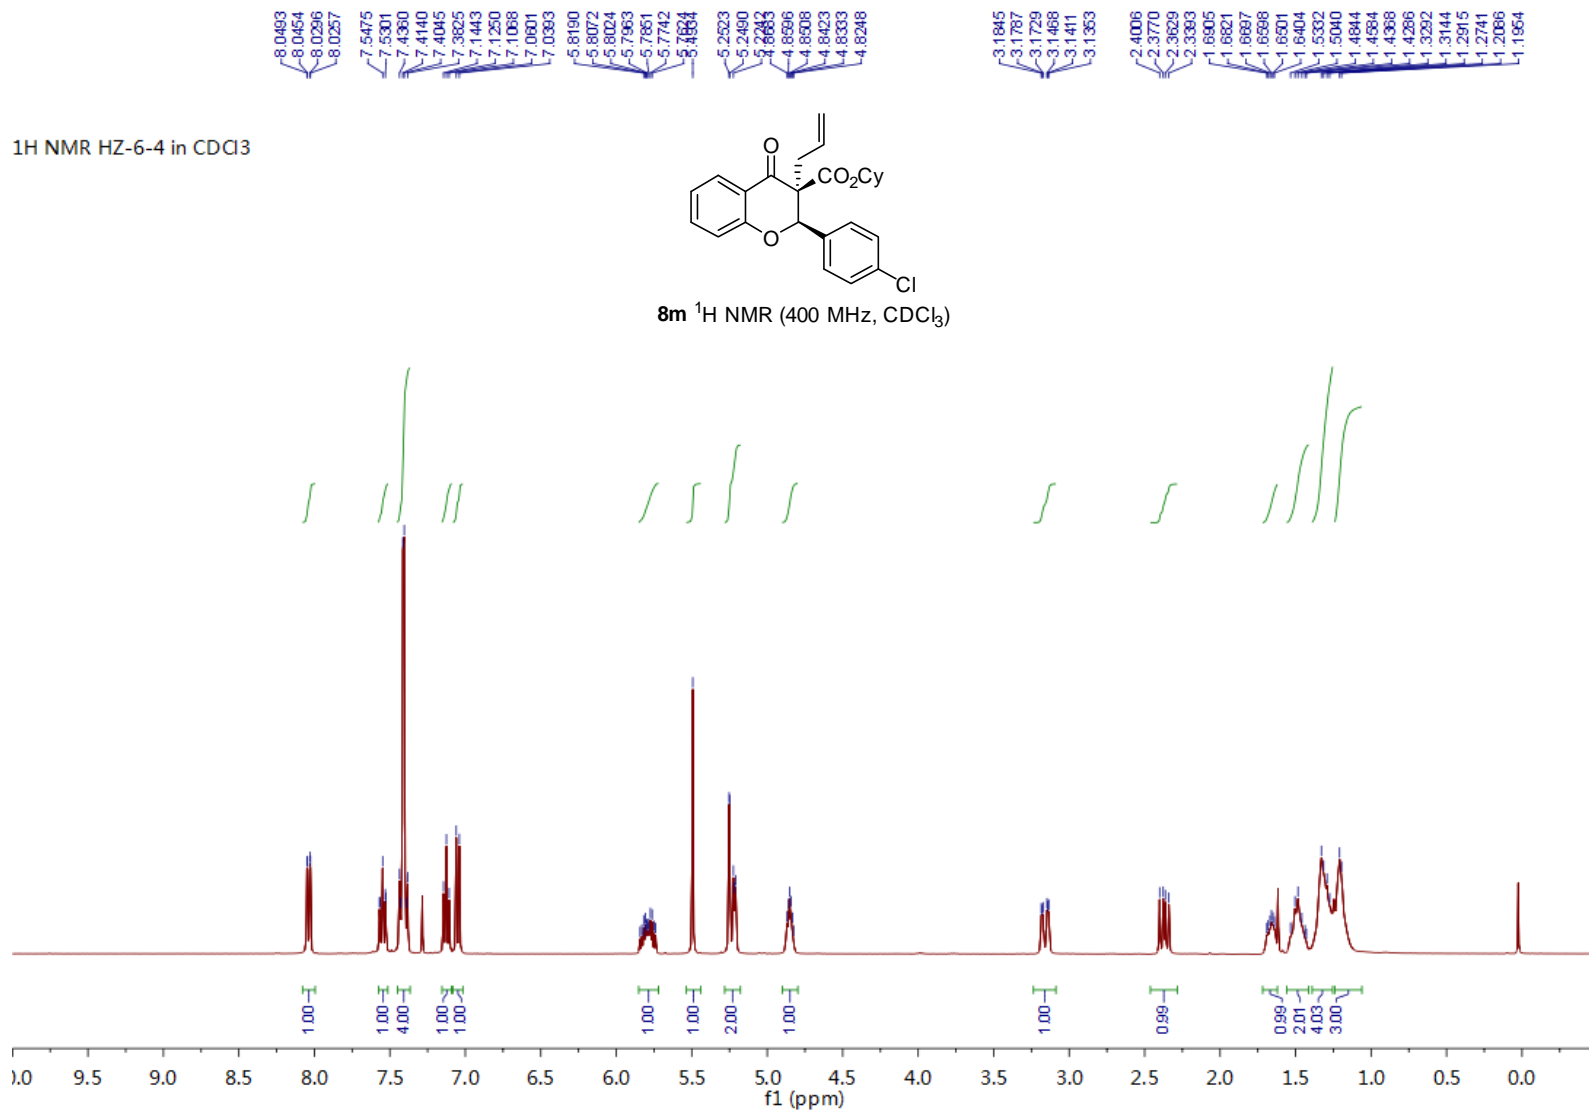

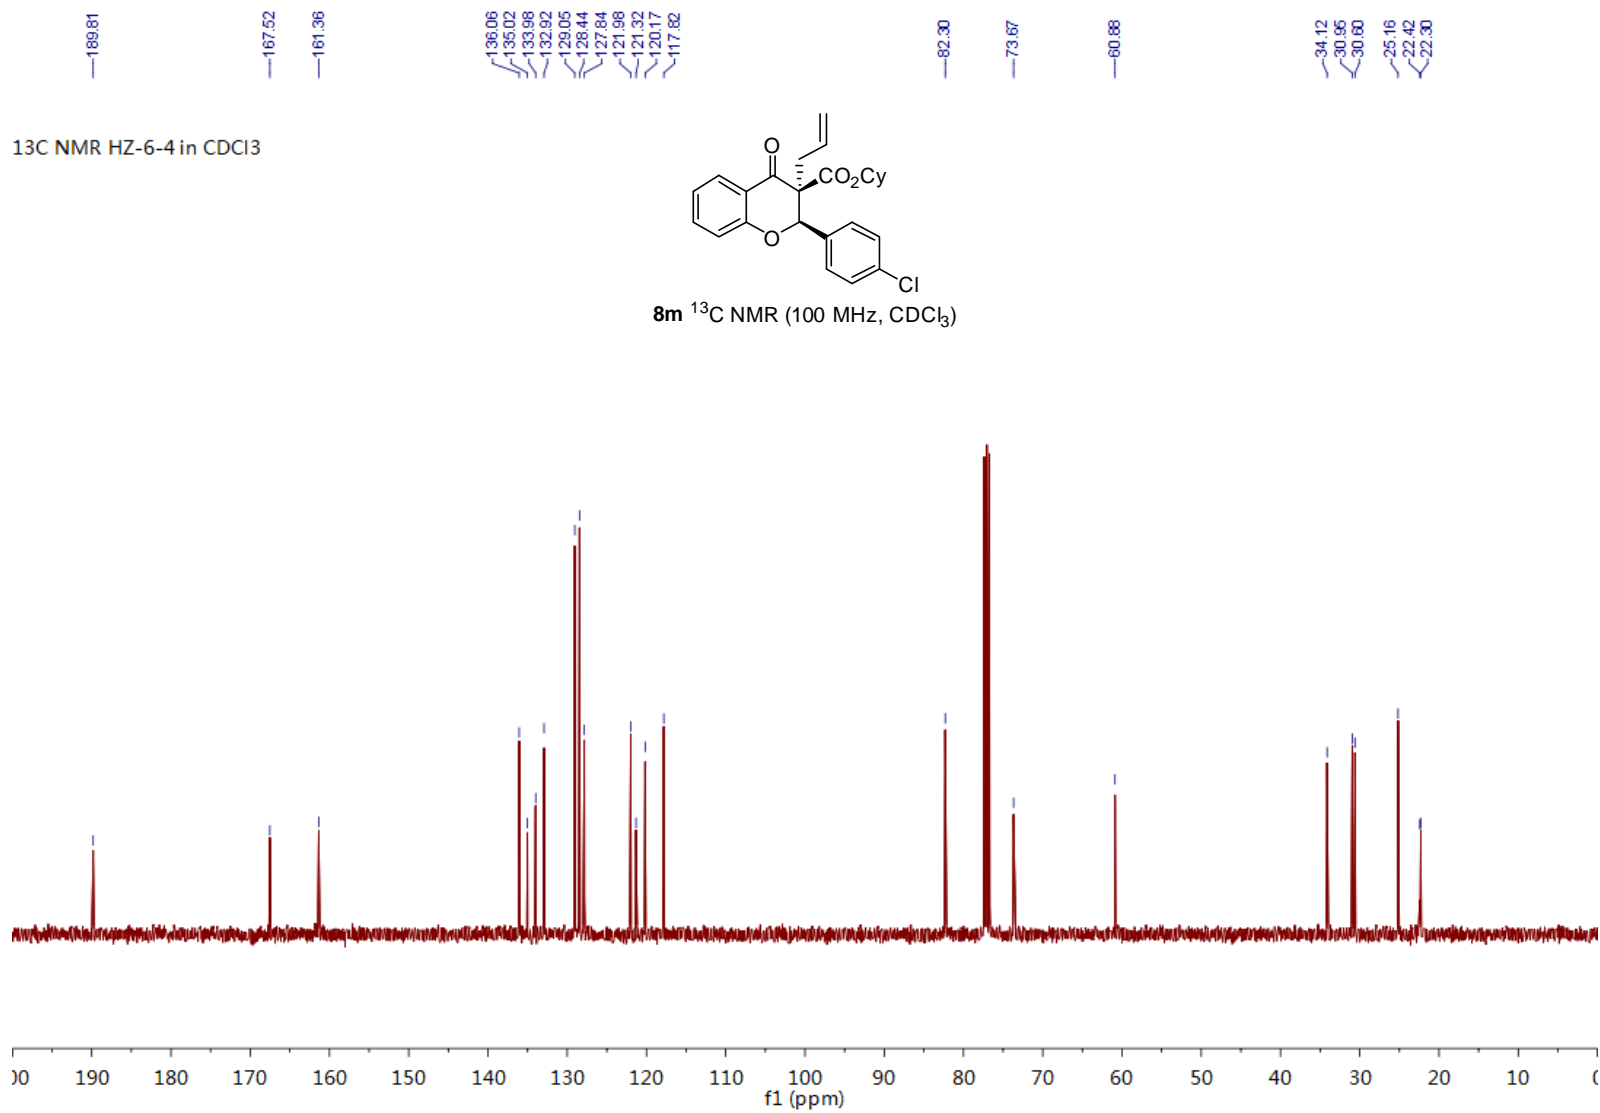

8.0478  
8.0438  
8.0281  
8.0240  
7.9694  
7.9650  
7.9603  
7.9512  
7.9483  
7.9438  
7.9377  
7.9306  
7.9282  
7.9243  
7.9086  
7.9042  
7.8916  
7.8475  
7.8417  
7.8453  
7.8427  
7.8251  
7.8105  
7.8050  
7.7992  
7.7977  
7.70384  
7.0368  
5.8286  
5.8167  
5.8051  
5.7987  
5.7935  
5.7883  
5.7872  
5.7802  
5.7717  
5.7601  
5.7483  
5.7366  
5.4785  
5.2527  
5.2485  
5.2284  
5.2243  
5.2200  
5.2125  
5.2095  
4.8667  
4.8579  
4.8481  
4.8404  
4.8313  
3.1900  
3.1850  
3.1791  
3.1733  
3.1682  
3.1623  
3.1472  
3.1414  
3.1356  
3.1305  
2.4008  
2.3772  
2.3600  
2.3384  
1.8800  
1.8684  
1.8590  
1.8475  
1.8377  
1.8304  
1.8028  
1.4830  
1.4686  
1.4525  
1.3346  
1.3282  
1.3234  
1.3137  
1.2887  
1.2118  
1.2077  
1.1950  
1.1730  
1.1571

<sup>1</sup>H NMR HZ-5-98B in CDCl<sub>3</sub>

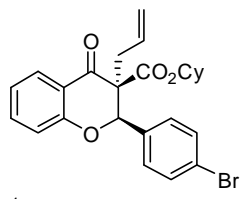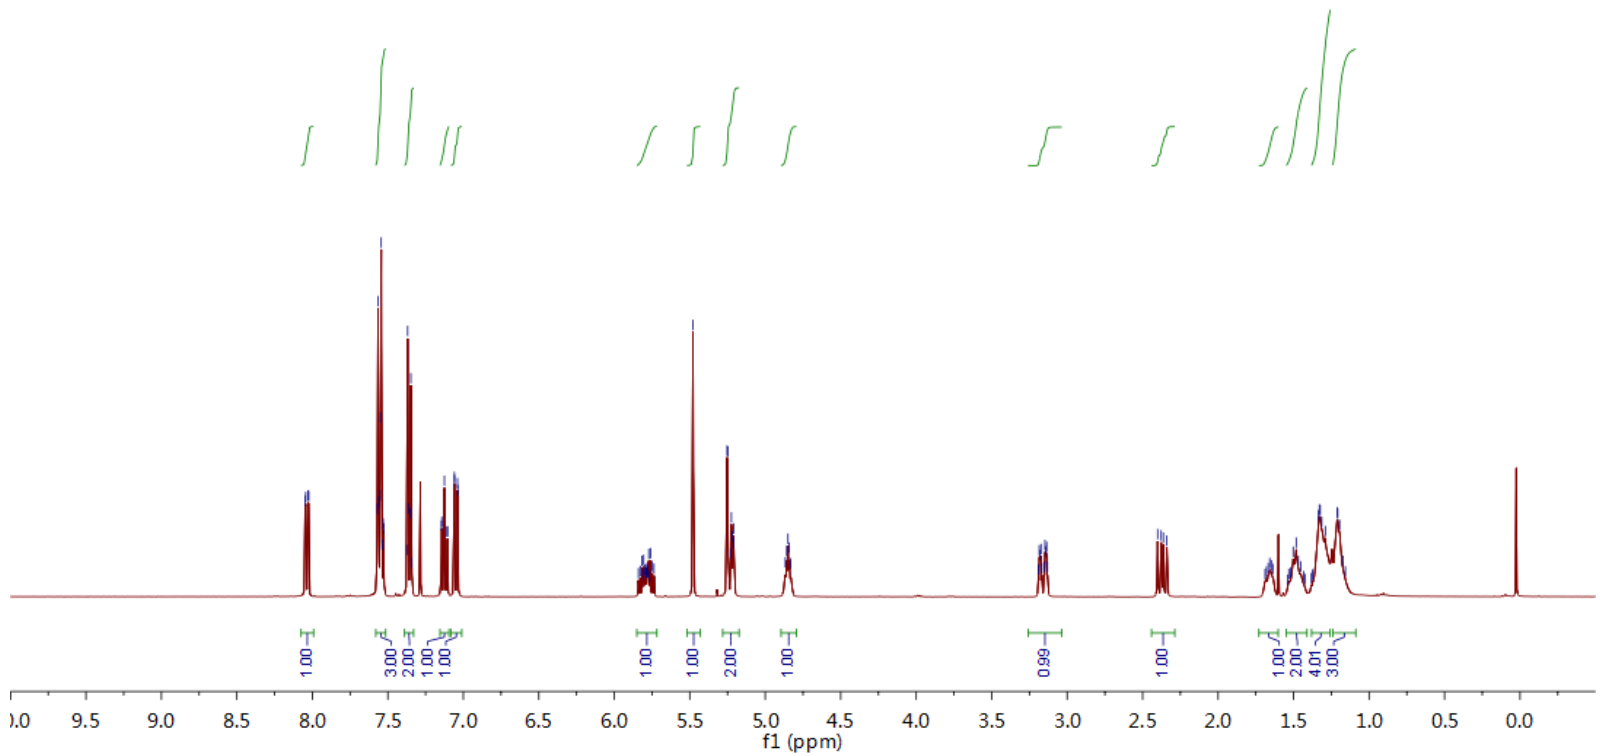

<sup>13</sup>C NMR HZ-5-98B in CDCl<sub>3</sub>

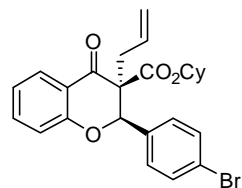

**8n** <sup>13</sup>C NMR (100 MHz, CDCl<sub>3</sub>)

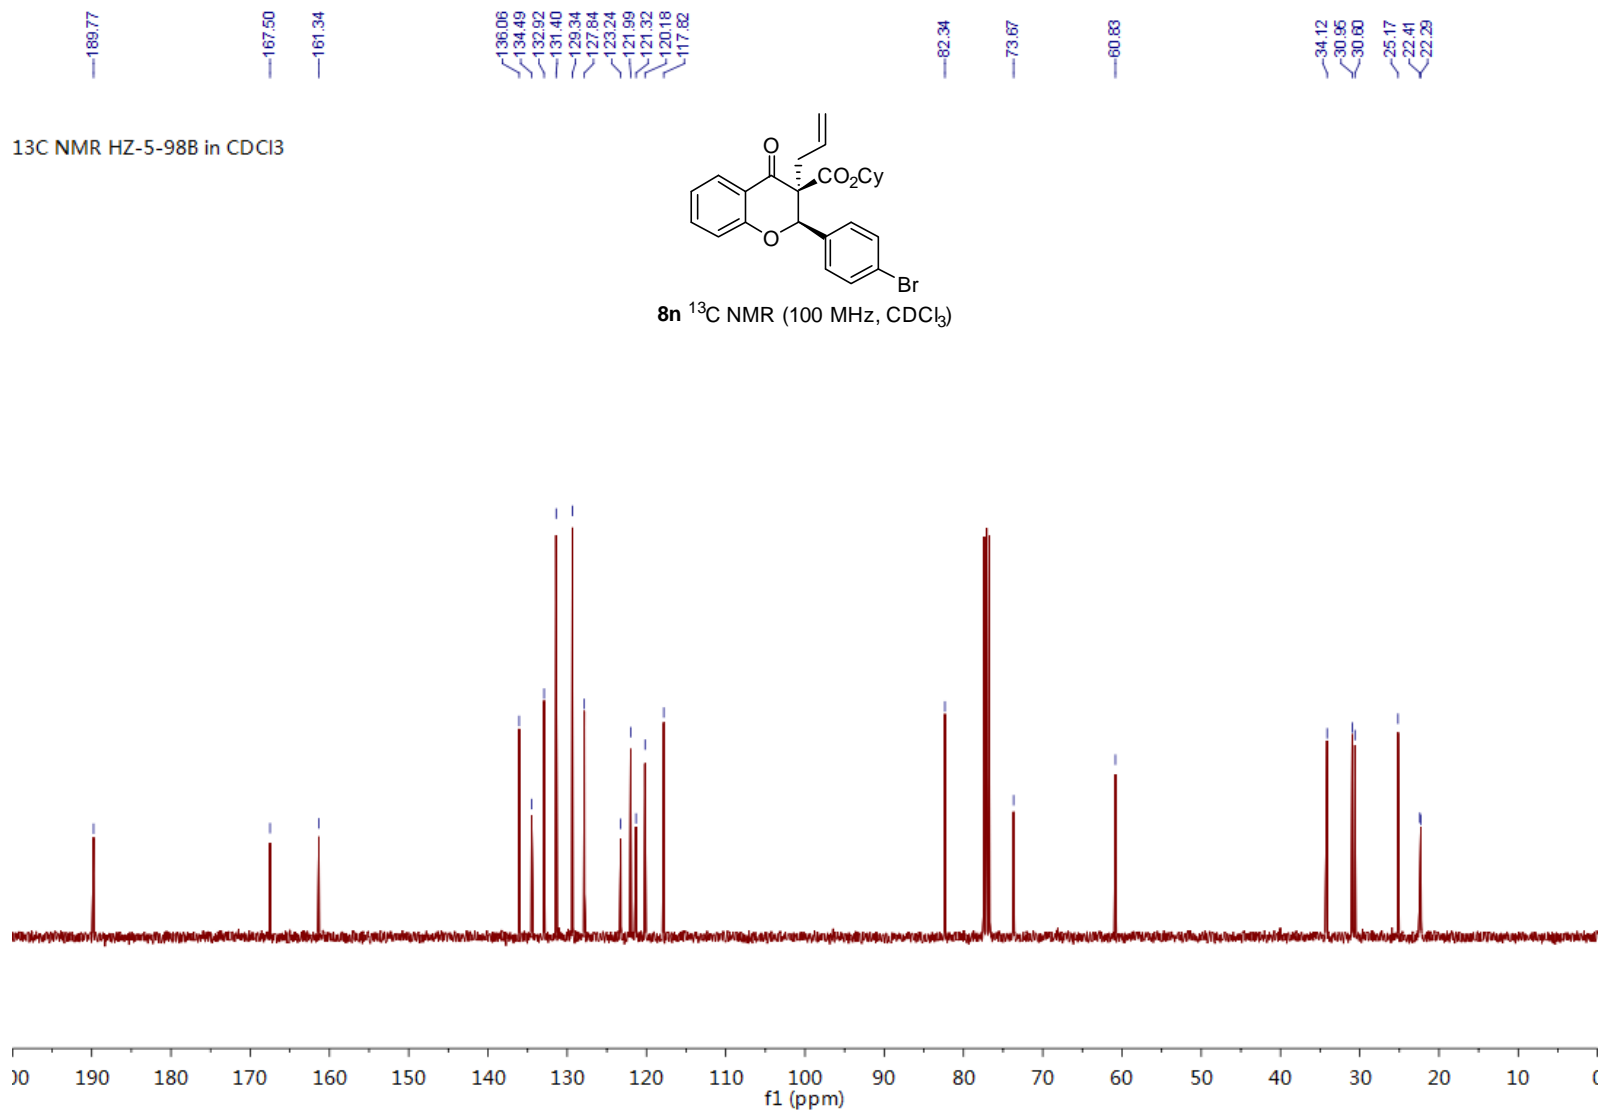

8.0433  
8.0392  
8.0236  
8.0194  
7.5524  
7.5480  
7.5344  
7.5313  
7.5273  
7.5136  
7.5092  
7.4109  
7.4035  
7.3866  
7.3818  
7.3745  
7.1233  
7.1208  
7.1032  
7.0856  
7.0831  
7.0801  
7.0586  
7.0383  
6.9588  
6.9514  
6.9462  
6.9345  
6.9294  
6.9220  
5.8223  
5.8102  
5.7888  
5.7780  
5.7659  
5.7542  
5.7423  
5.4845  
5.2420  
5.2404  
5.2373  
5.2312  
5.2272  
5.2227  
5.2017  
5.1981  
4.8939  
4.8850  
4.8763  
4.8676  
4.8586  
3.8959  
3.1678  
3.1617  
3.1558  
3.1508  
3.1353  
3.1304  
3.1246  
3.1184  
3.1135  
2.4021  
2.3786  
2.3647  
2.3411  
1.8815  
1.8717  
1.8611  
1.8513  
1.5363  
1.5159  
1.5078  
1.4942  
1.4859  
1.3601  
1.3476  
1.3285  
1.3063  
1.2893  
1.2626  
1.2650  
1.2499  
1.2166  
1.2013  
1.1937

<sup>1</sup>H NMR HZ-6-8A in CDCl<sub>3</sub>

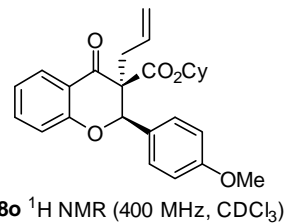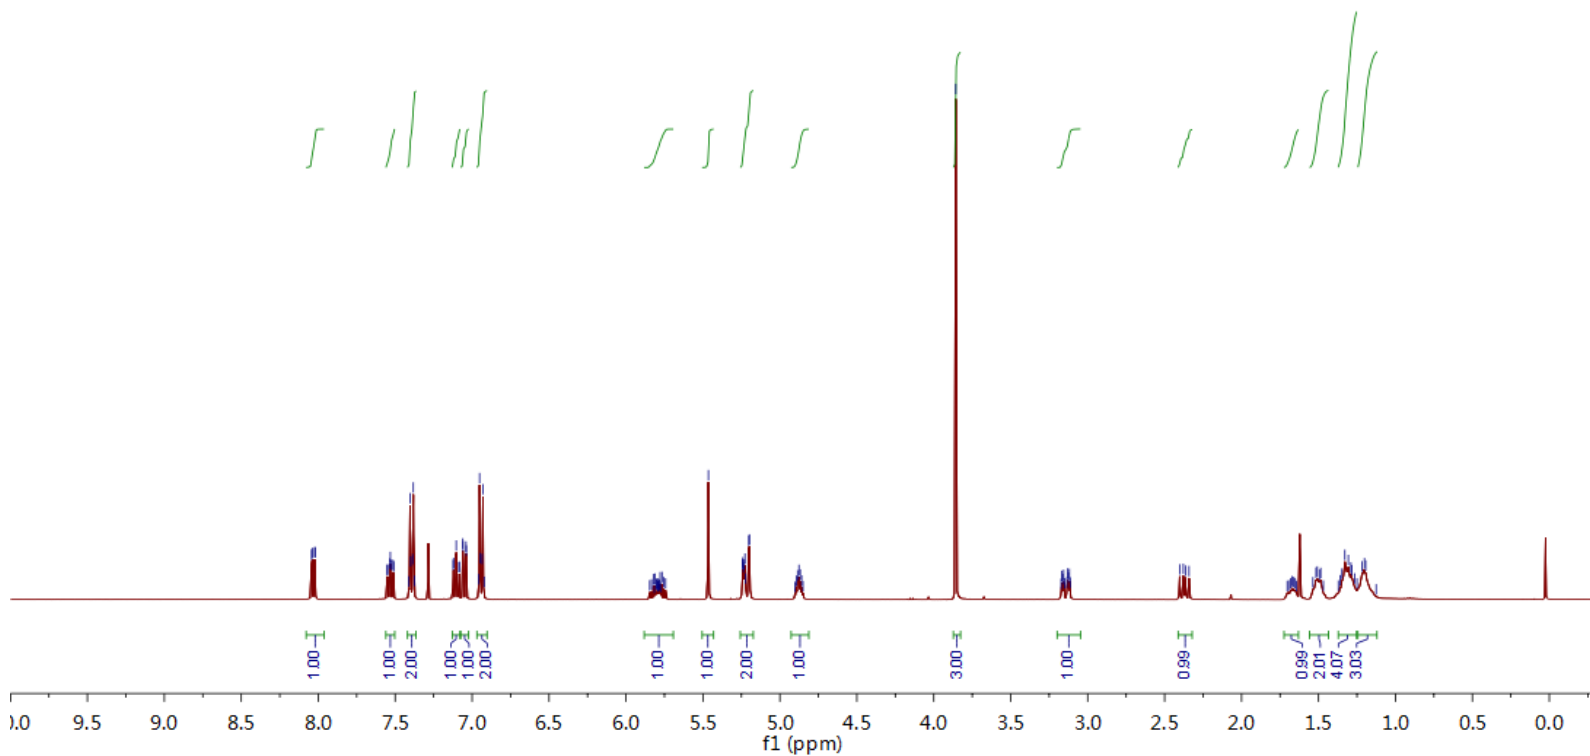

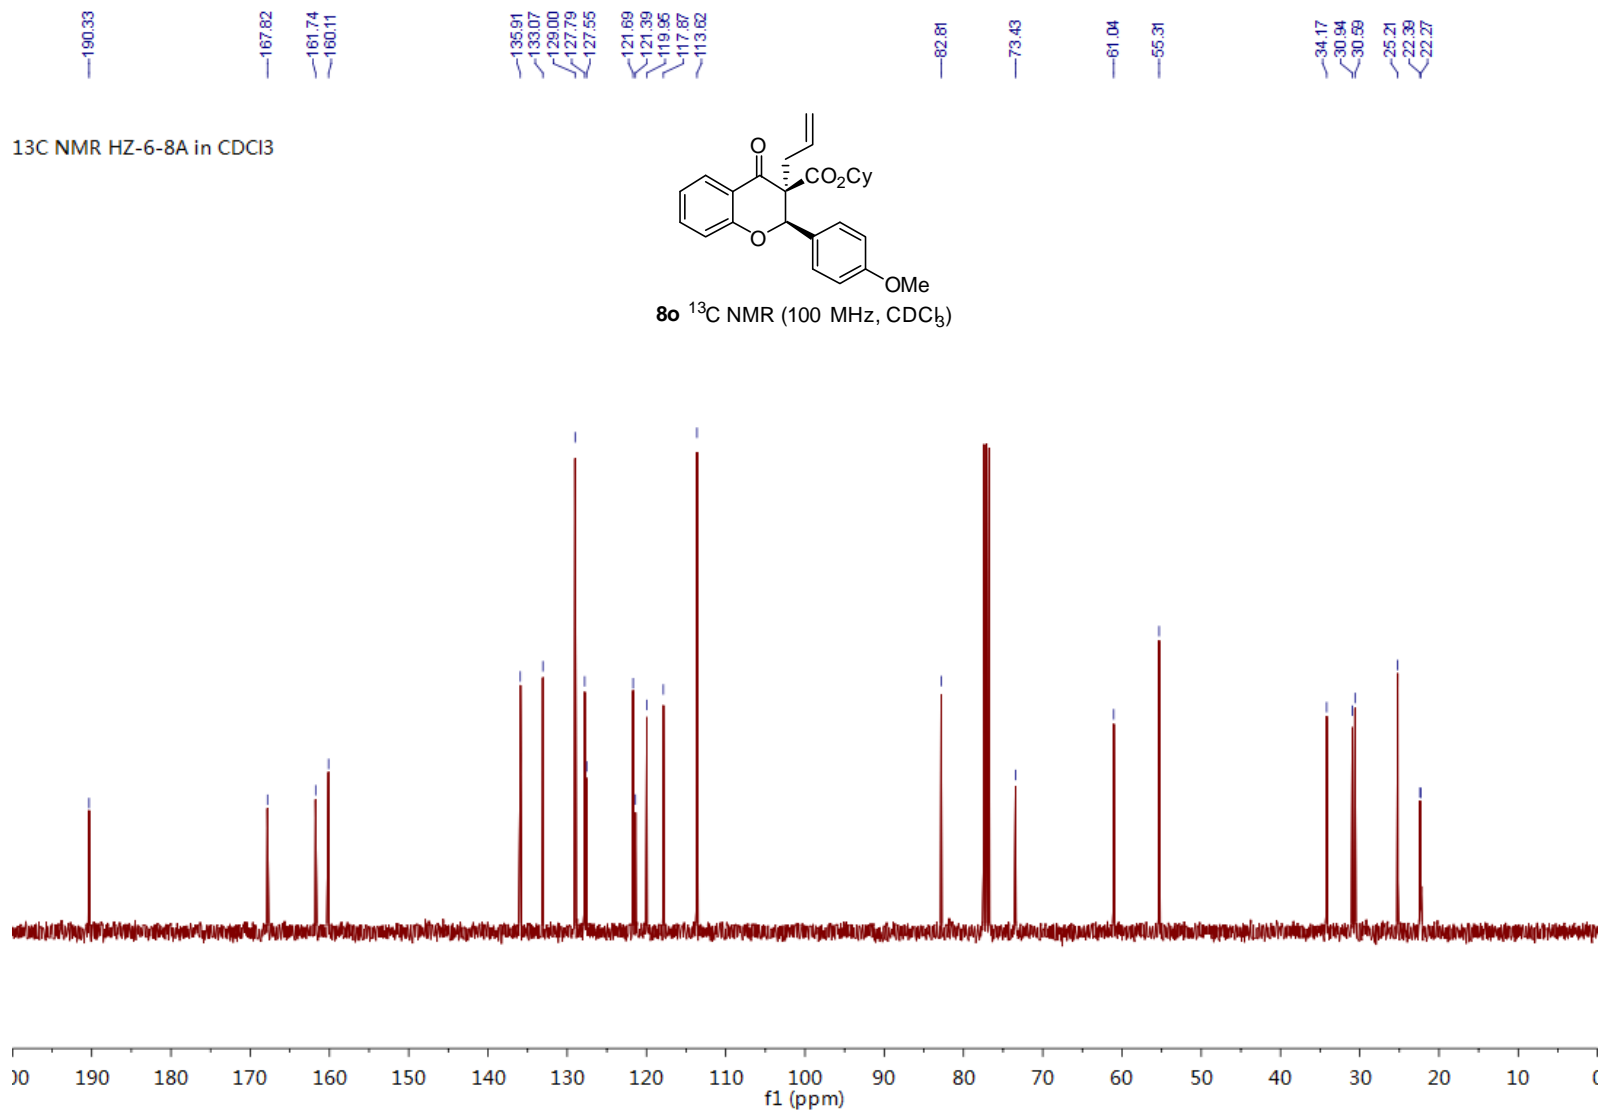

8.0484  
8.0455  
8.0297  
8.0258  
7.9661  
7.9610  
7.9437  
7.9383  
7.9222  
7.9529  
7.9331  
7.9132  
7.9121  
7.9130  
7.0944  
7.0789  
7.0562  
7.0410  
7.0368  
6.9684  
6.9607  
6.9459  
6.9402  
5.8285  
5.8165  
5.8103  
5.8038  
5.7887  
5.7822  
5.7680  
5.7739  
5.7611  
5.7495  
5.4989  
5.2881  
5.2627  
5.2477  
5.2313  
5.2276  
4.8823  
4.8737  
4.8652  
4.8567  
4.8480  
3.8334  
3.2114  
3.2057  
3.1999  
3.1953  
3.1783  
3.1738  
3.1681  
3.1623  
3.1590  
2.4987  
2.4350  
2.4210  
2.3873  
1.8660  
1.8615  
1.8726  
1.8623  
1.8521  
1.5392  
1.5384  
1.5220  
1.5161  
1.5067  
1.4929  
1.4870  
1.4634  
1.3699  
1.3483  
1.3216  
1.3159  
1.2989  
1.2820  
1.2659  
1.2473  
1.2263  
1.2063  
1.1976  
1.1913  
1.1808  
1.1589  
1.1400  
1.1386

<sup>1</sup>H NMR HZ-5-90B in CDCl<sub>3</sub>

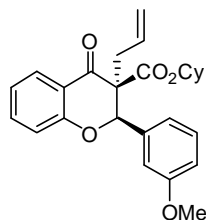

**8p** <sup>1</sup>H NMR (400 MHz, CDCl<sub>3</sub>)

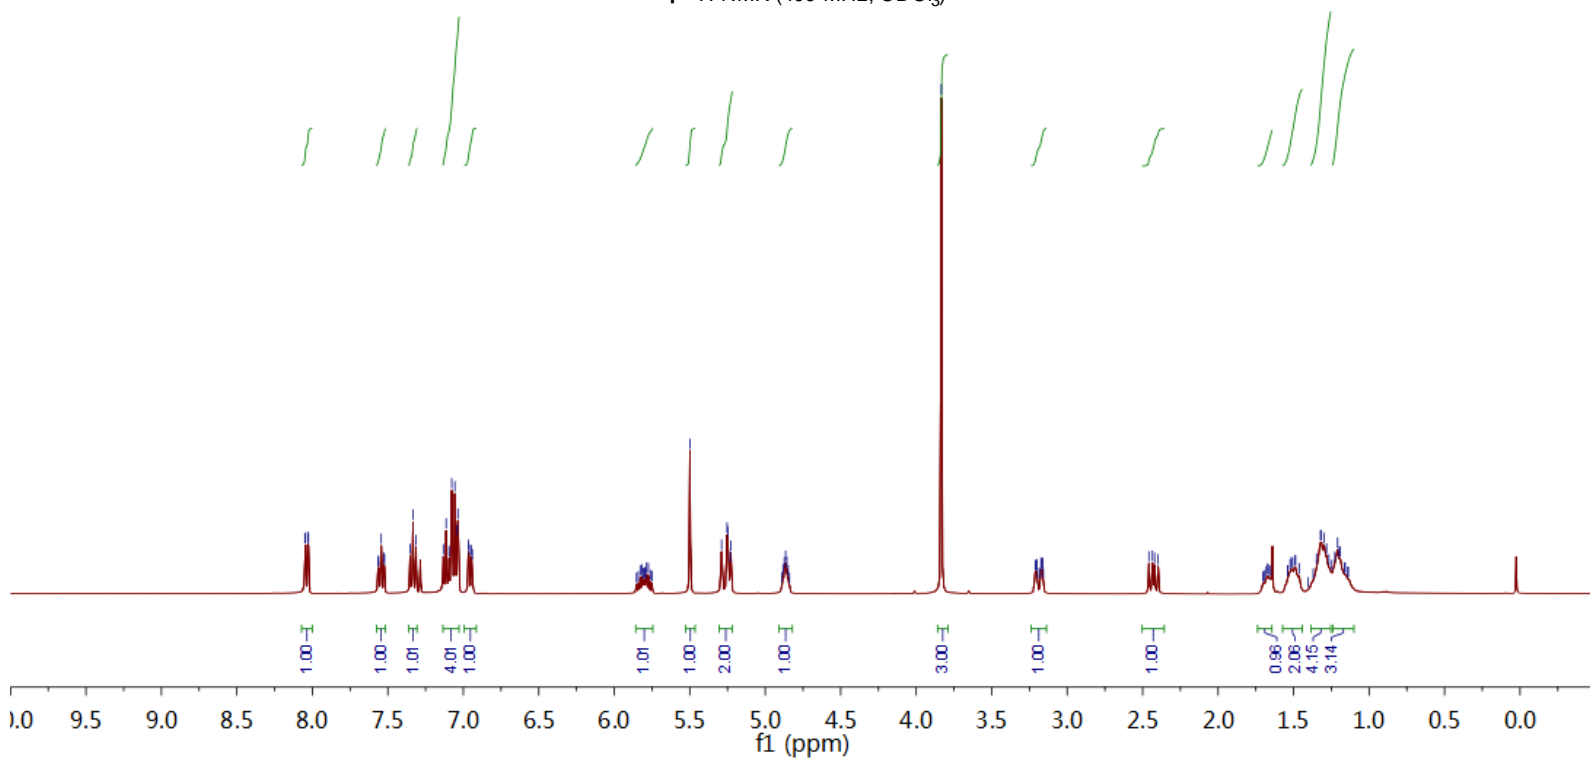

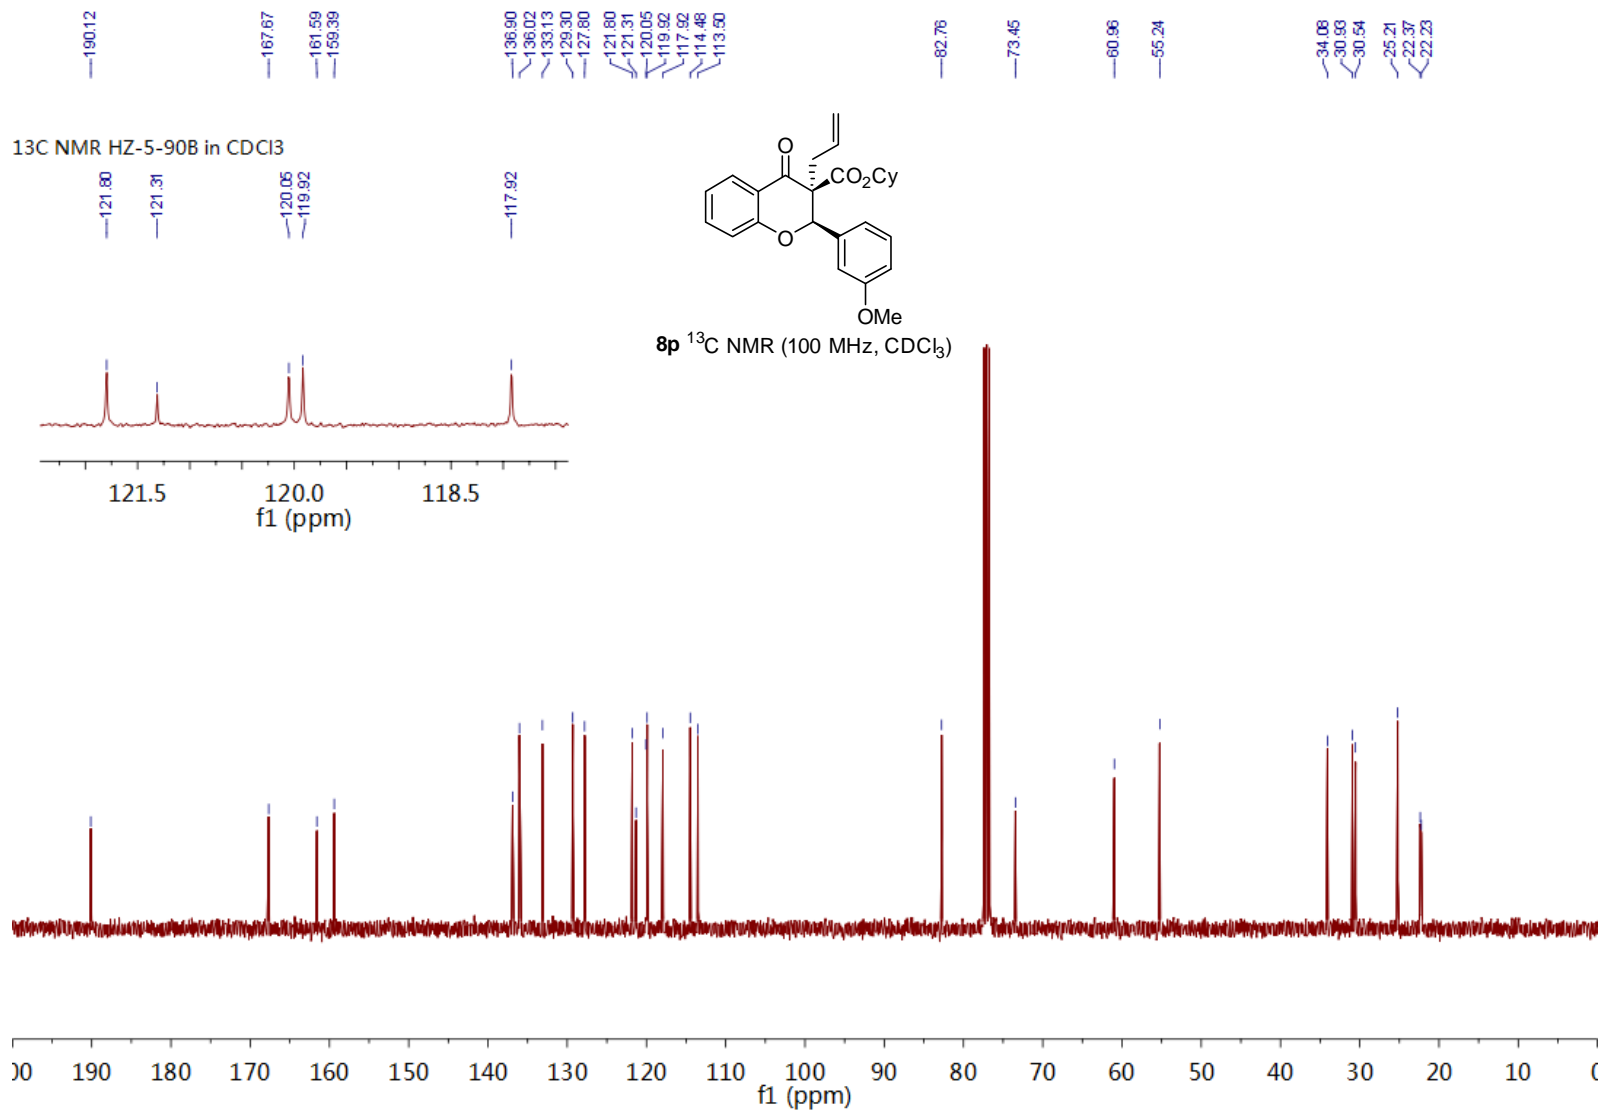



<sup>1</sup>H NMR HZ-6-13A in CDCl<sub>3</sub>

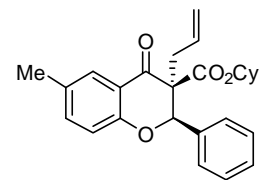

8q <sup>1</sup>H NMR (400 MHz, CDCl<sub>3</sub>)

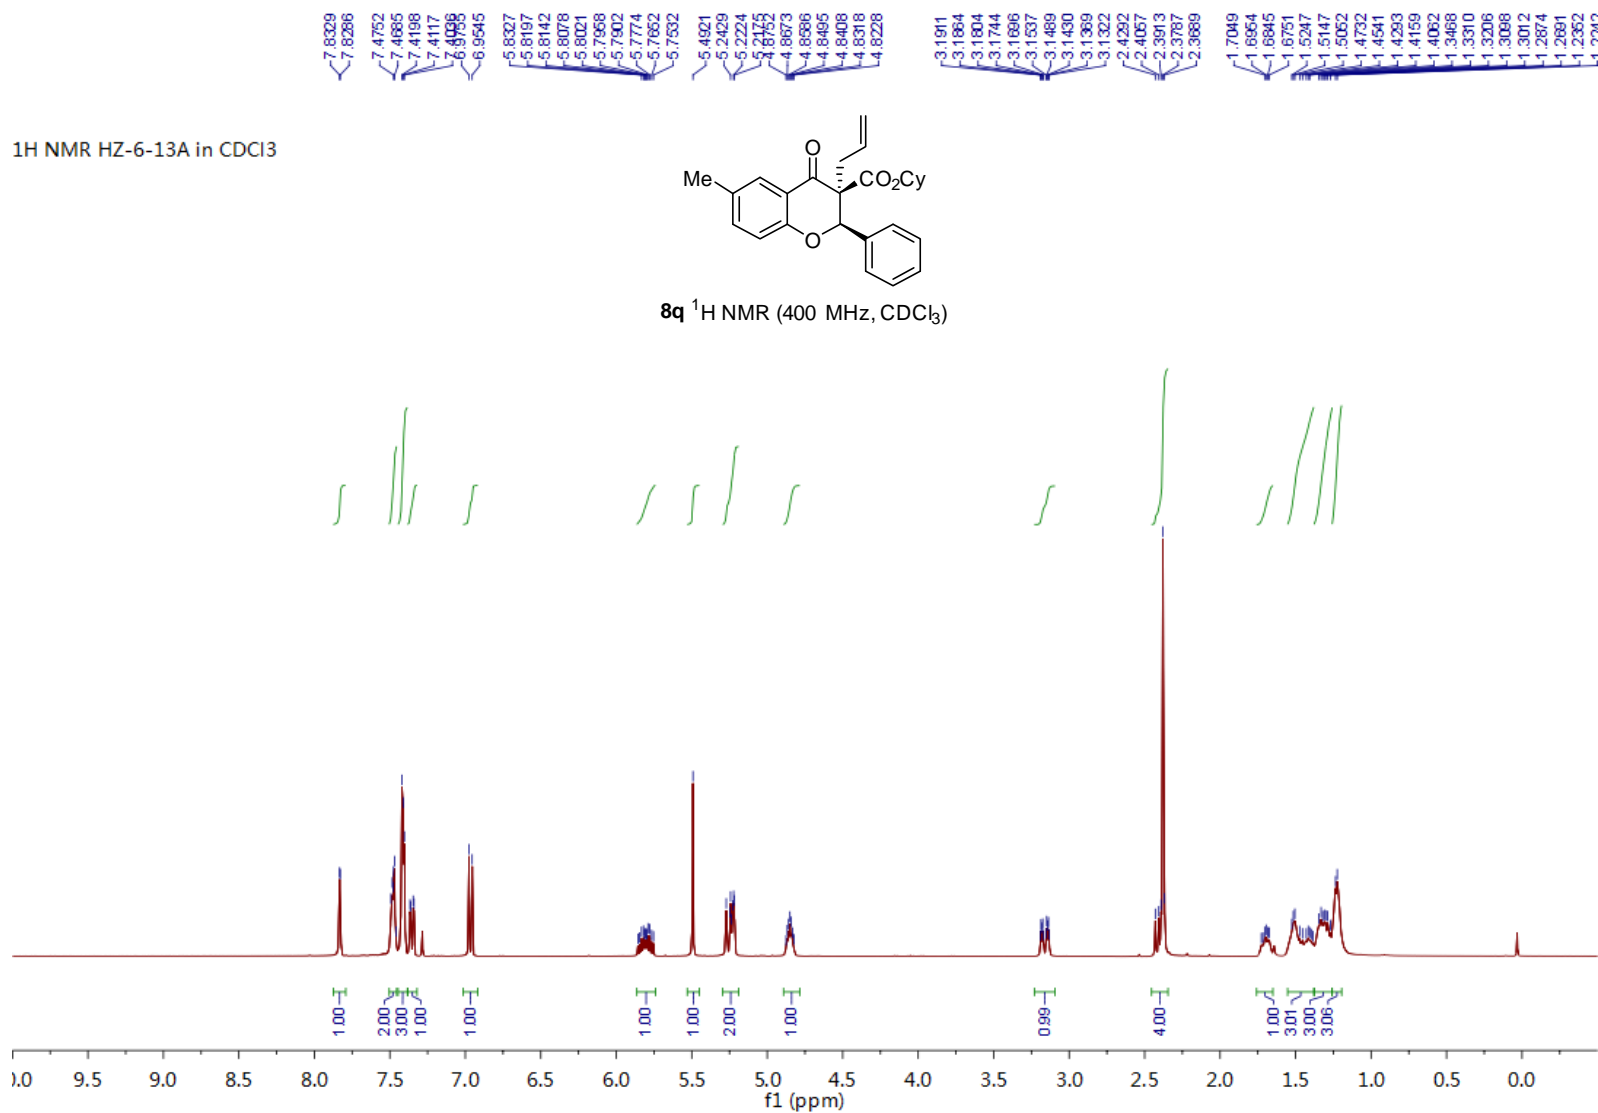

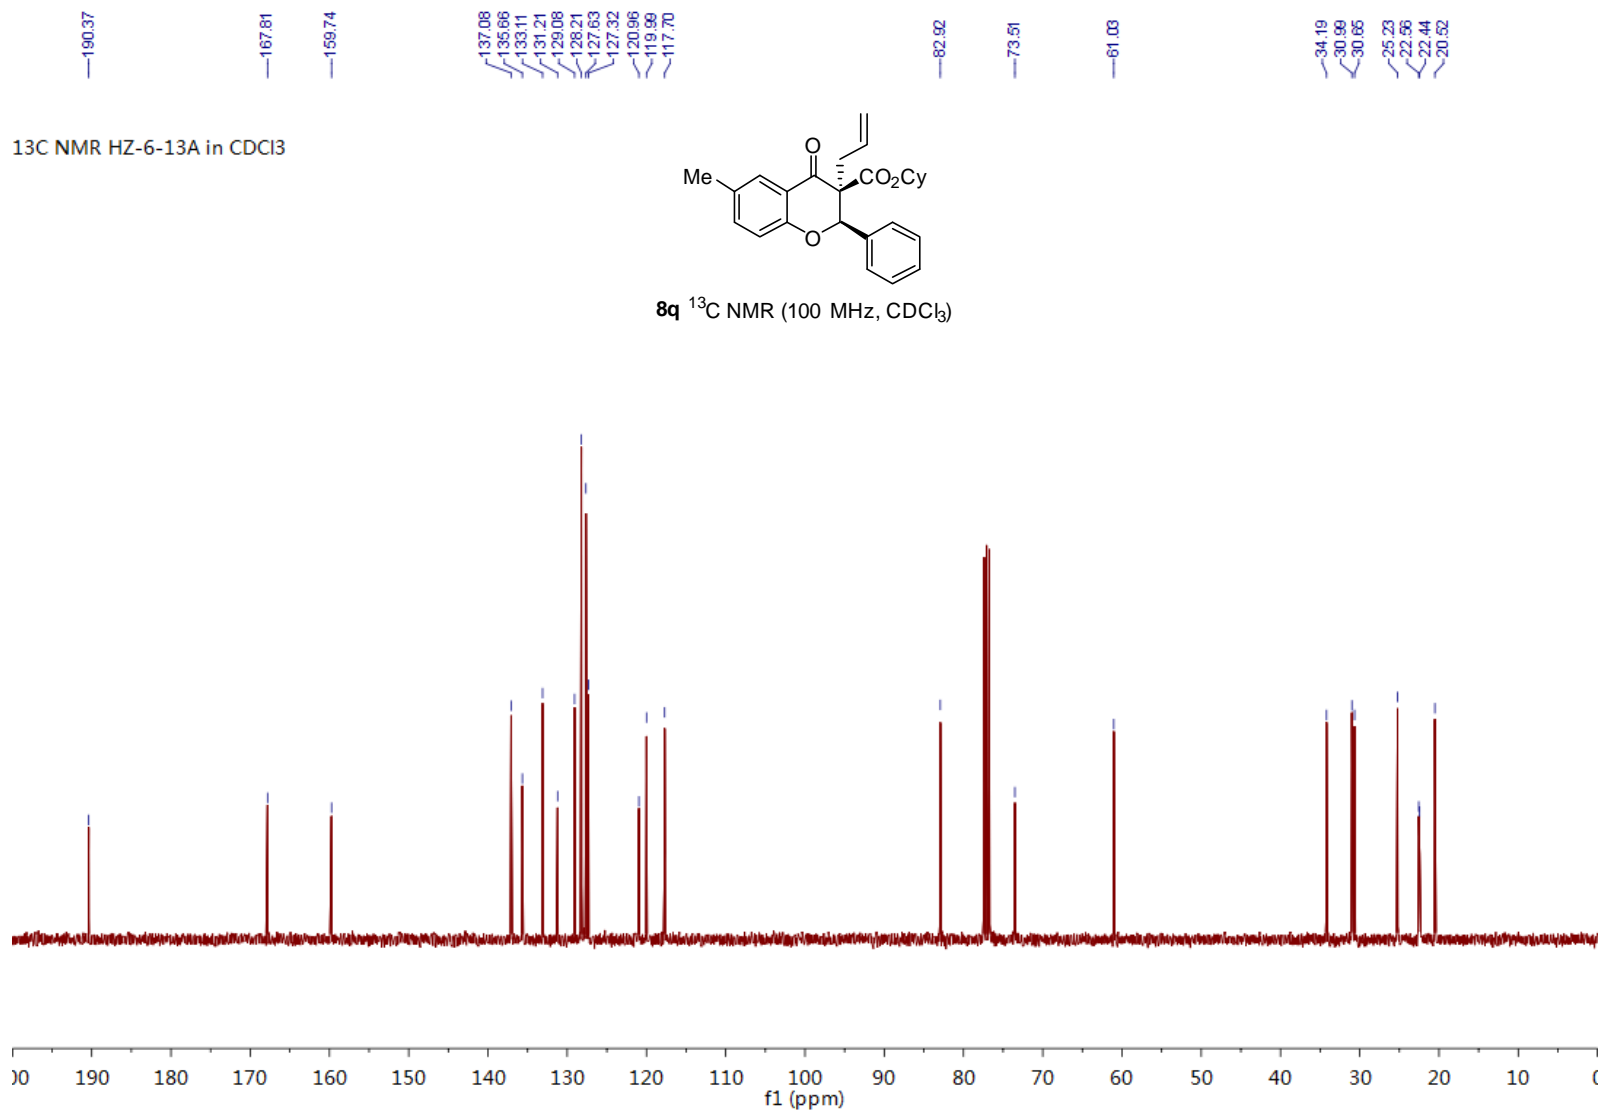

<sup>1</sup>H NMR HZ-6-25 in CDCl<sub>3</sub>

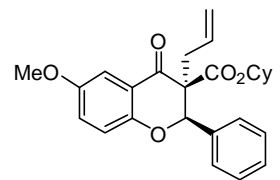

**8r** <sup>1</sup>H NMR (400 MHz, CDCl<sub>3</sub>)

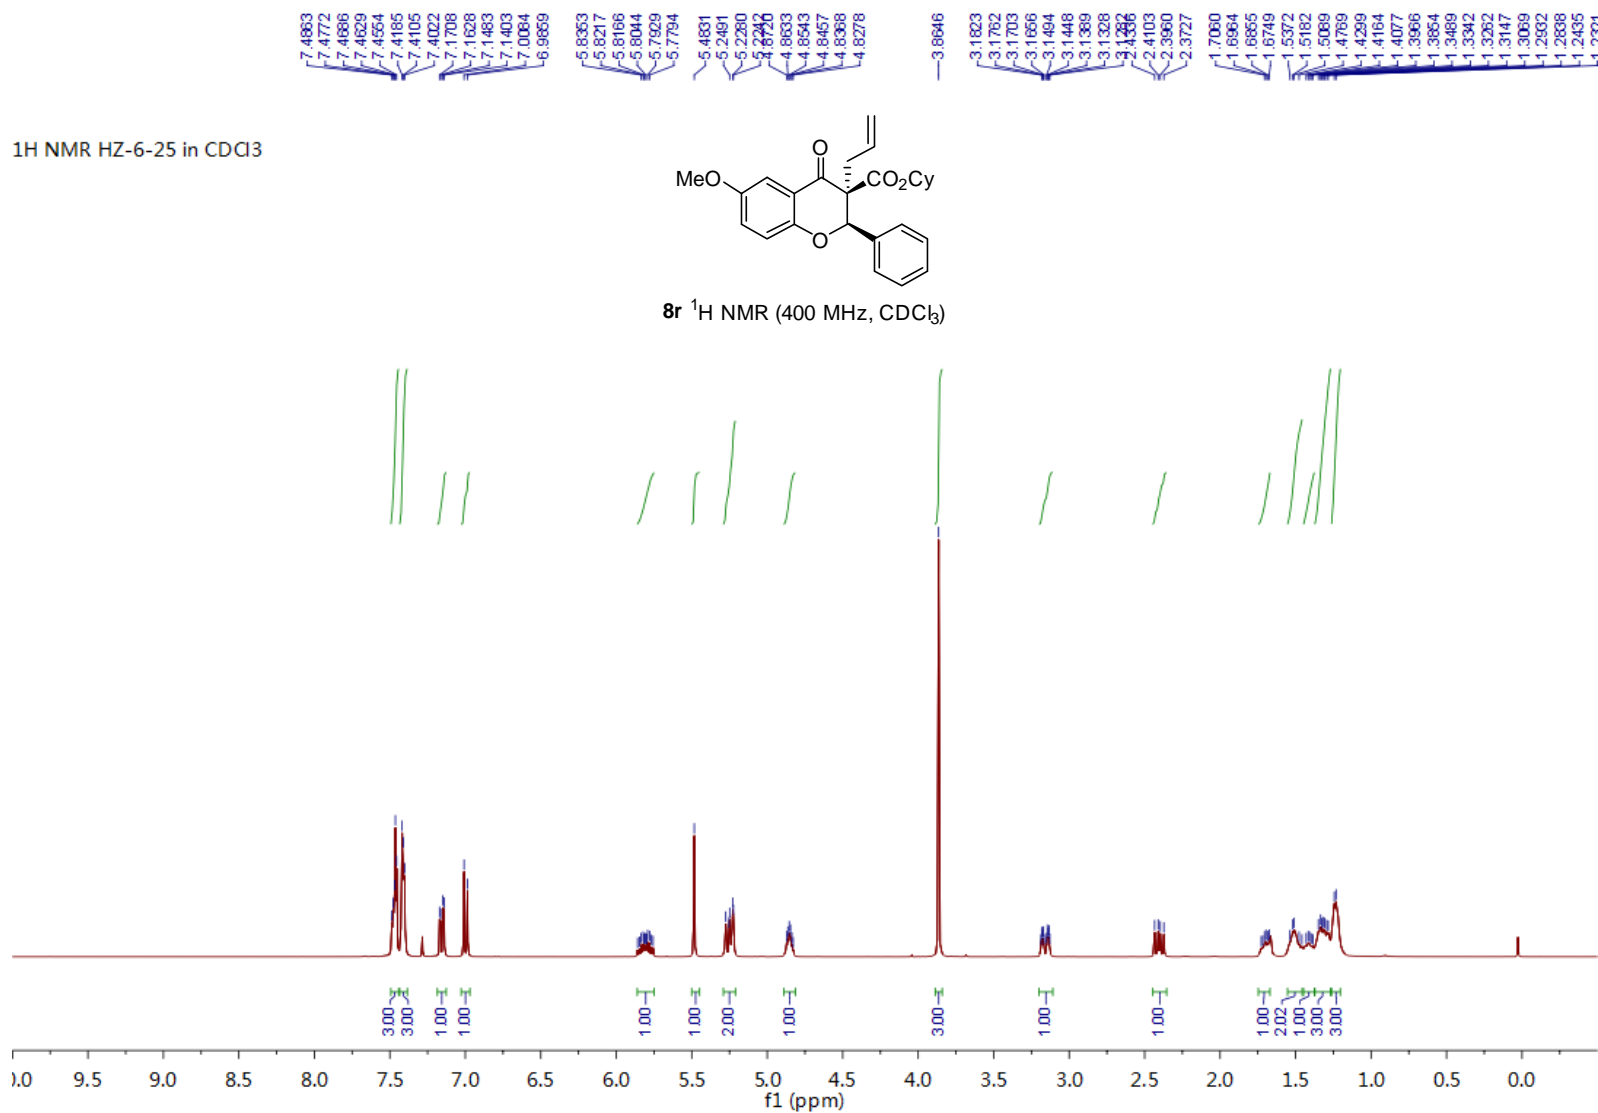

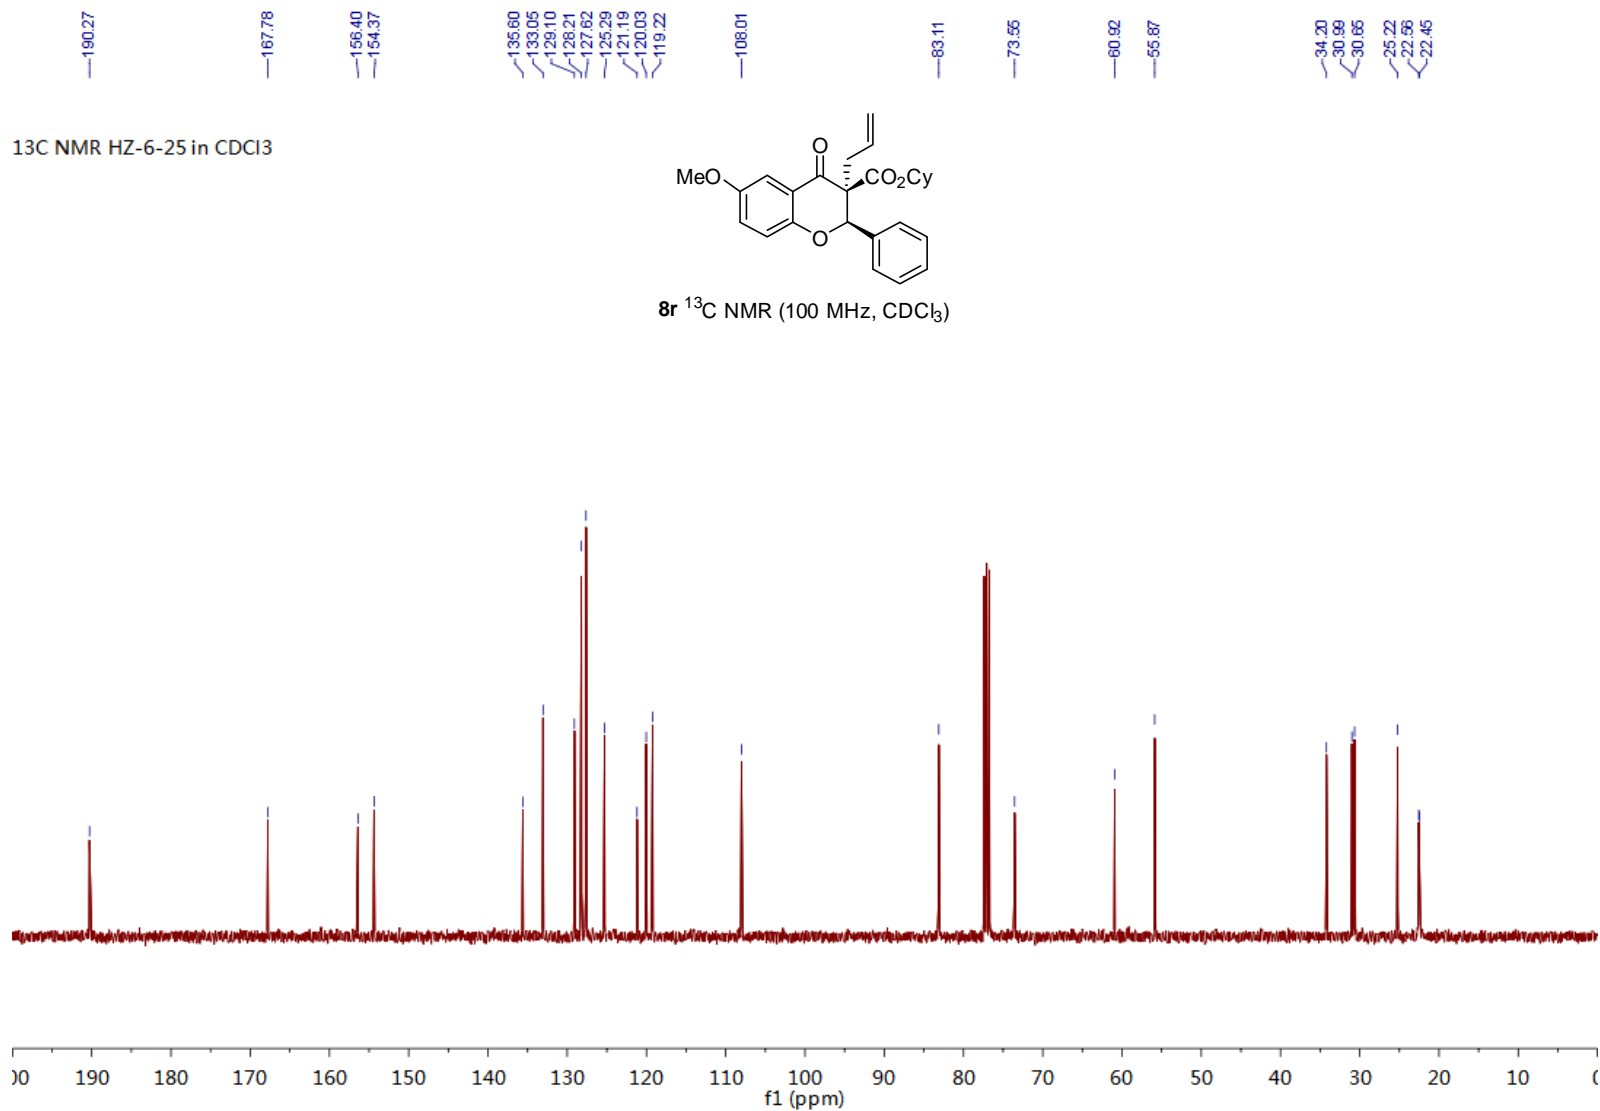

7.9012  
7.8803  
7.8656  
7.8598  
7.8506  
7.8484  
7.8402  
7.8351  
7.8293  
7.8232  
7.8152  
7.8110  
7.8050  
7.8019  
7.7842  
7.7788  
7.7713  
7.7669  
7.7505  
7.7480  
5.8294  
5.8174  
5.8057  
5.7933  
5.7856  
5.7817  
5.7734  
5.7696  
5.7617  
5.7494  
5.7378  
5.7258  
5.5123  
5.2713  
5.2696  
5.2656  
5.2629  
5.2578  
5.2324  
5.2277  
4.8643  
4.8556  
4.8467  
4.8380  
4.8289  
4.8200  
3.1780  
3.1710  
3.1648  
3.1590  
3.1540  
3.1384  
3.1334  
3.1277  
3.1214  
3.1164  
2.4152  
2.3918  
2.3775  
2.3541  
1.7384  
1.7298  
1.7171  
1.7073  
1.6974  
1.6879  
1.6199  
1.5087  
1.5008  
1.4913  
1.4818  
1.4710  
1.4597  
1.4408  
1.4211  
1.4086  
1.3737  
1.3659  
1.3582  
1.3490  
1.3385  
1.3106  
1.2894  
1.2804  
1.2733  
1.2557  
1.2377

<sup>1</sup>H NMR HZ-6-14B in CDCl<sub>3</sub>

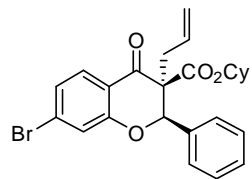

**8s** <sup>1</sup>H NMR (400 MHz, CDCl<sub>3</sub>)

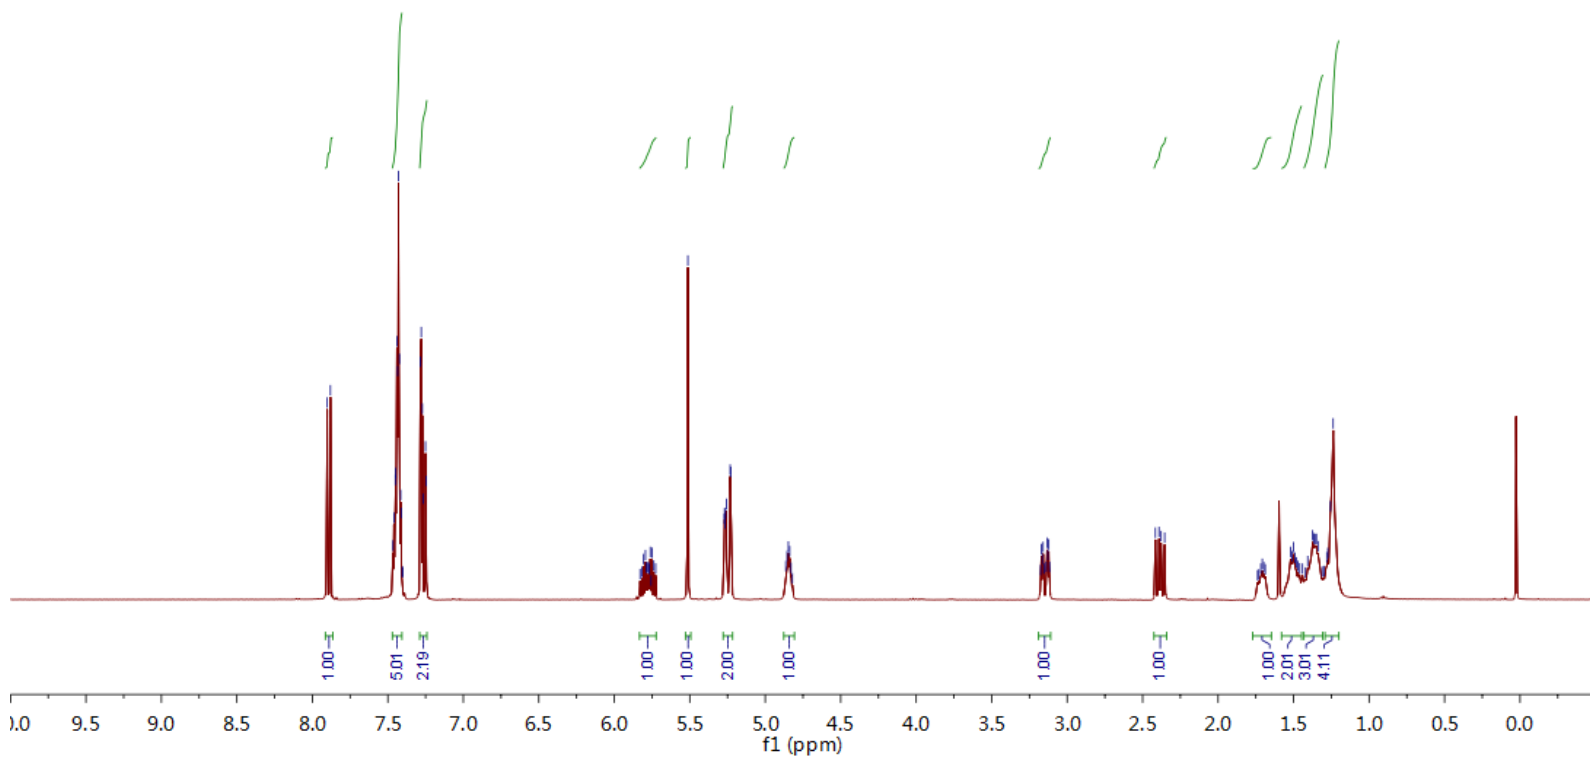

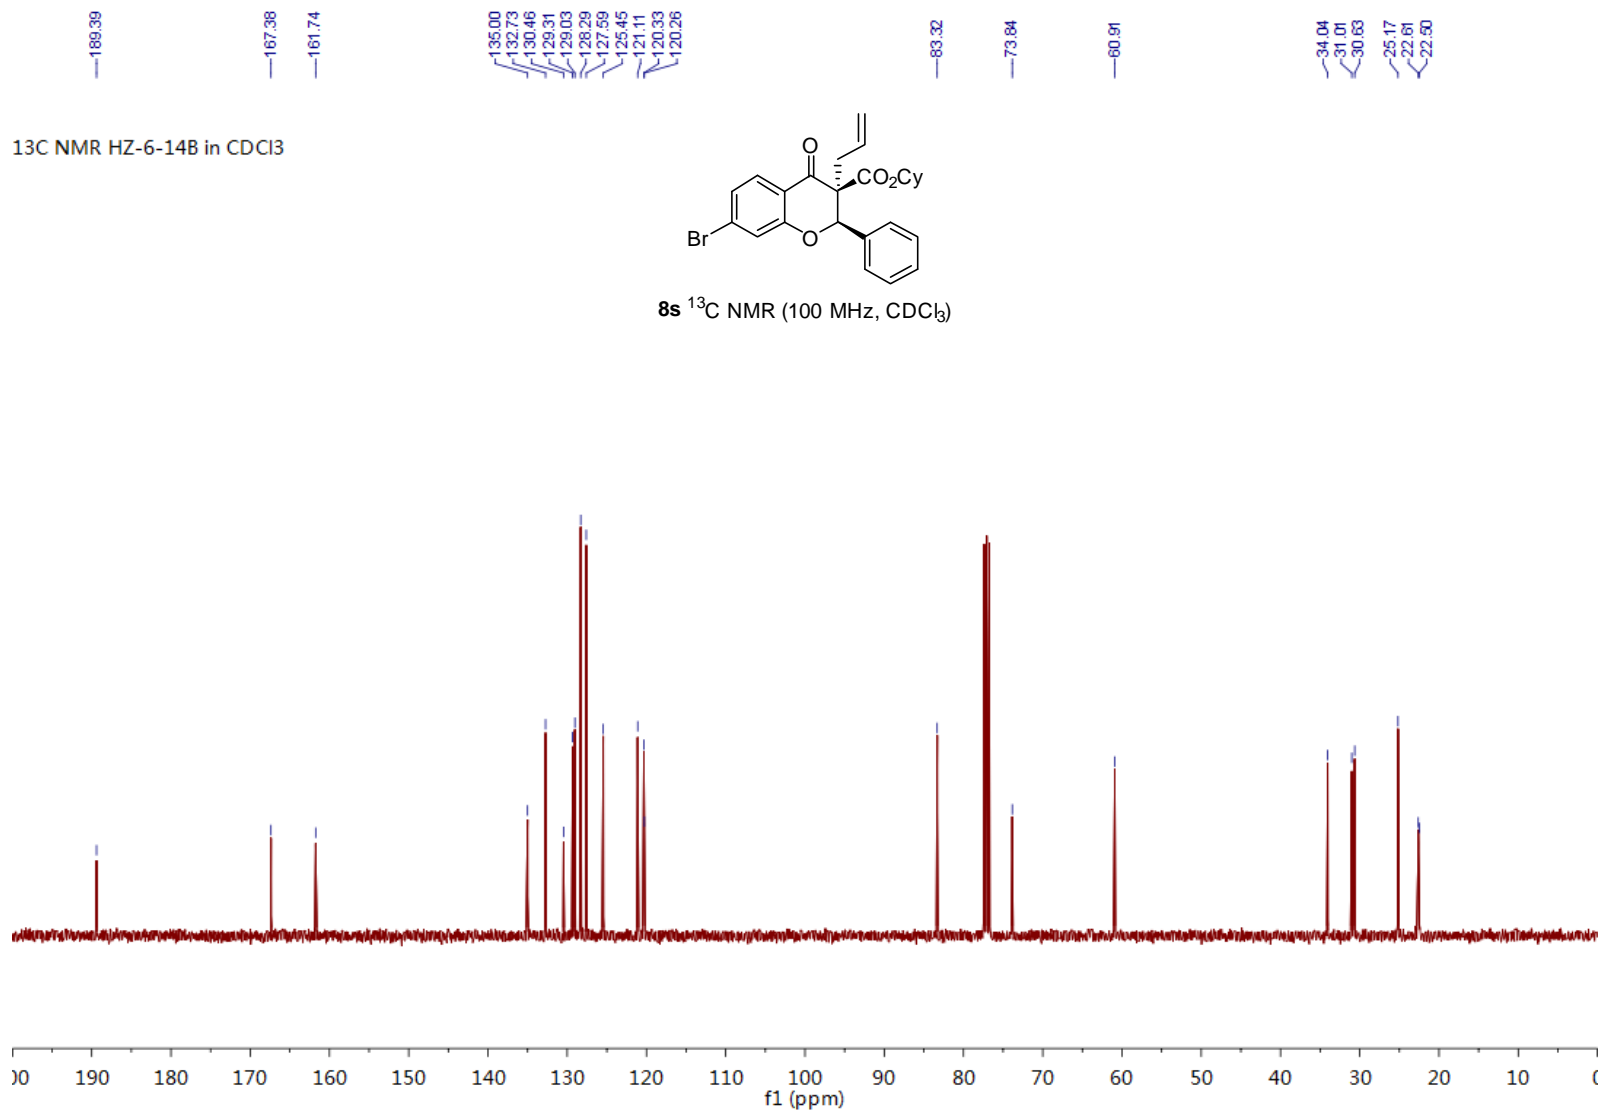

7.9804  
7.9783  
7.9607  
7.9566  
7.9569  
7.4946  
7.4809  
7.4779  
7.4769  
7.4738  
7.4601  
7.4558  
7.0632  
7.0606  
7.0449  
7.0431  
7.0412  
7.0255  
7.0230  
6.9717  
6.9701  
6.9509  
6.9492  
5.7033  
5.6896  
5.6849  
5.6784  
5.6719  
5.6654  
5.6607  
5.6472  
5.6358  
5.2345  
5.2321  
5.2301  
5.2276  
5.1919  
5.1894  
5.1874  
5.1849  
5.1186  
5.1148  
5.1110  
5.0653  
5.0696  
5.0657  
4.8630  
4.8542  
4.8454  
4.8367  
4.8278  
4.5463  
4.5322  
4.5160  
4.4999  
3.2522  
3.2480  
3.2434  
3.2393  
3.2204  
3.2163  
3.2120  
3.2075  
3.2033  
3.1992  
2.6227  
2.5966  
2.5867  
2.5629  
1.5844  
1.5682  
1.5523  
1.5416  
1.5305  
1.5228  
1.3725  
1.3581  
1.3415  
1.3239  
1.3070  
1.2975  
1.2915  
1.2630  
1.2446  
1.2287  
1.2160  
1.2028

1H NMR HZ-6-9B in CDCl3

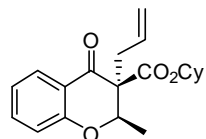

8t <sup>1</sup>H NMR (400 MHz, CDCl<sub>3</sub>)

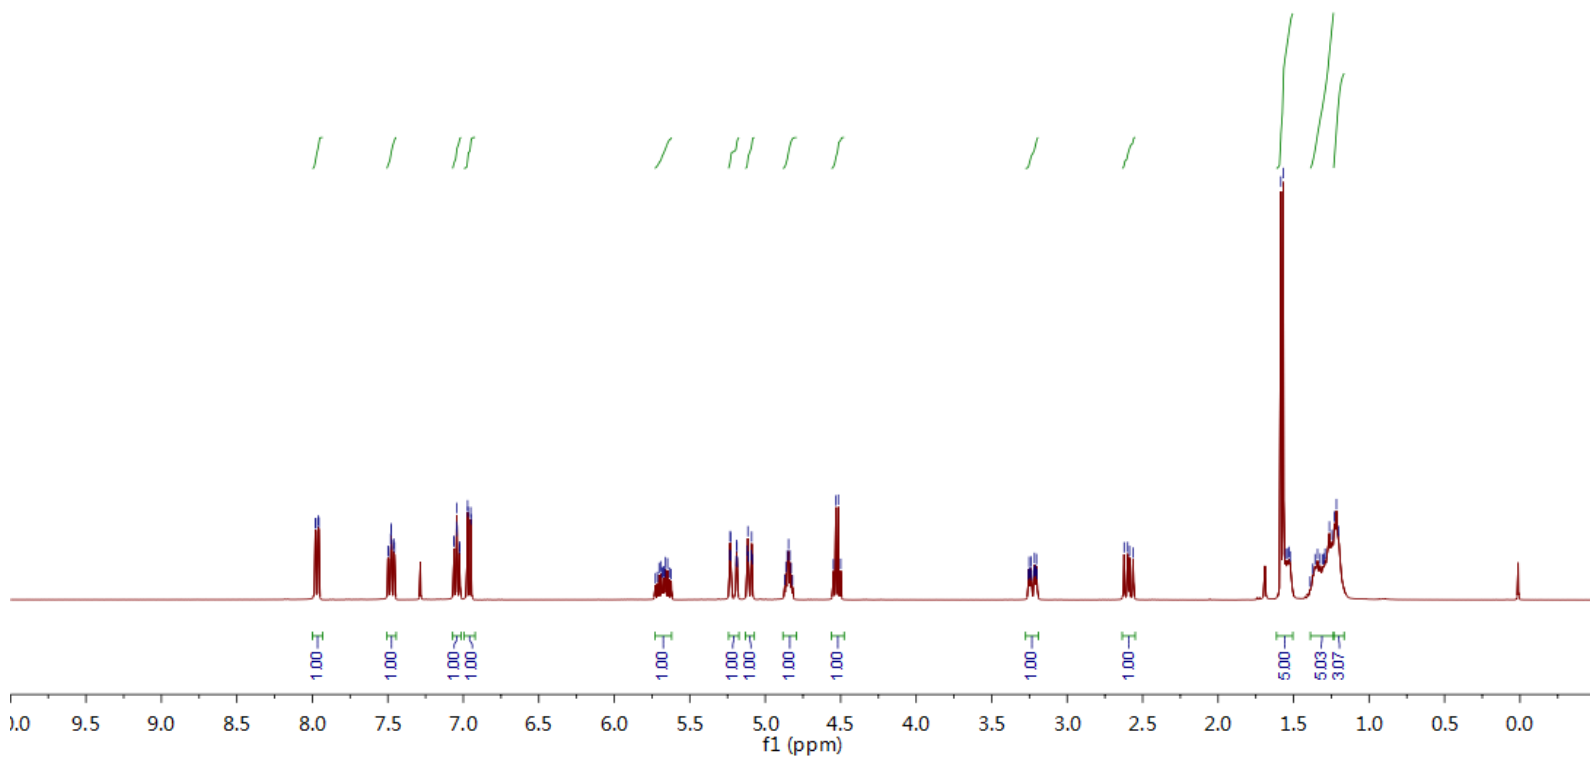

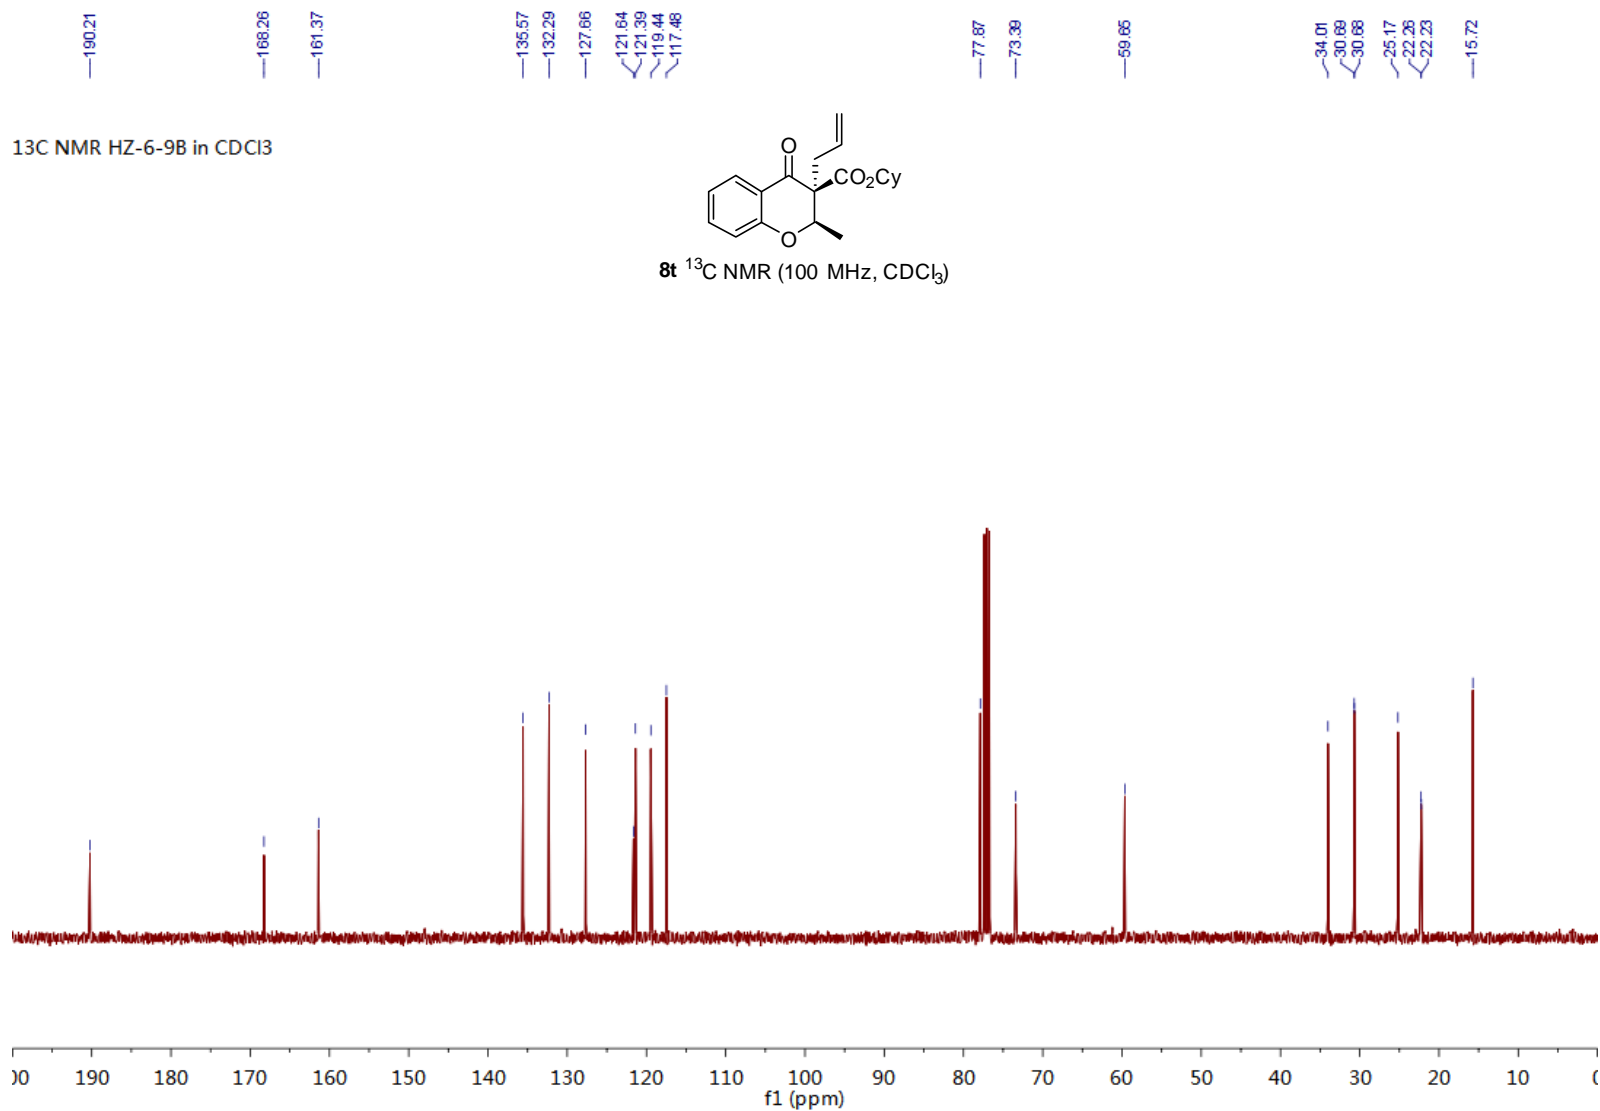



7.9783  
7.9742  
7.9586  
7.9545  
7.9500  
7.947  
7.909  
7.8773  
7.8740  
7.8603  
7.8559  
7.0560  
7.0566  
7.0389  
7.0214  
7.0190  
6.9821  
6.9613  
5.6795  
5.6680  
5.6371  
5.6235  
5.2159  
5.2145  
5.1732  
5.1718  
5.1162  
5.1126  
5.0808  
5.0673  
5.0636  
4.8516  
4.8427  
4.8339  
4.8252  
4.8163  
4.3610  
4.3547  
4.3374  
4.3304  
3.2704  
3.2573  
3.2345  
3.2304  
3.2253  
3.2214  
2.8668  
2.6419  
2.6298  
2.6060  
1.8842  
1.8613  
1.8714  
1.8603  
1.8568  
1.8508  
1.8465  
1.8403  
1.8360  
1.8299  
1.8237  
1.7986  
1.7892  
1.7716  
1.7533  
1.6657  
1.5526  
1.5435  
1.5340  
1.5253  
1.4930  
1.4748  
1.4706  
1.3700  
1.3550  
1.3394  
1.3222  
1.3066  
1.2901  
1.2658  
1.2511  
1.2381  
1.2234  
1.0050  
0.9865

<sup>1</sup>H NMR HZ-6-388 in CDCl<sub>3</sub>

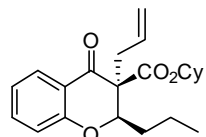

**8u** <sup>1</sup>H NMR (400 MHz, CDCl<sub>3</sub>)

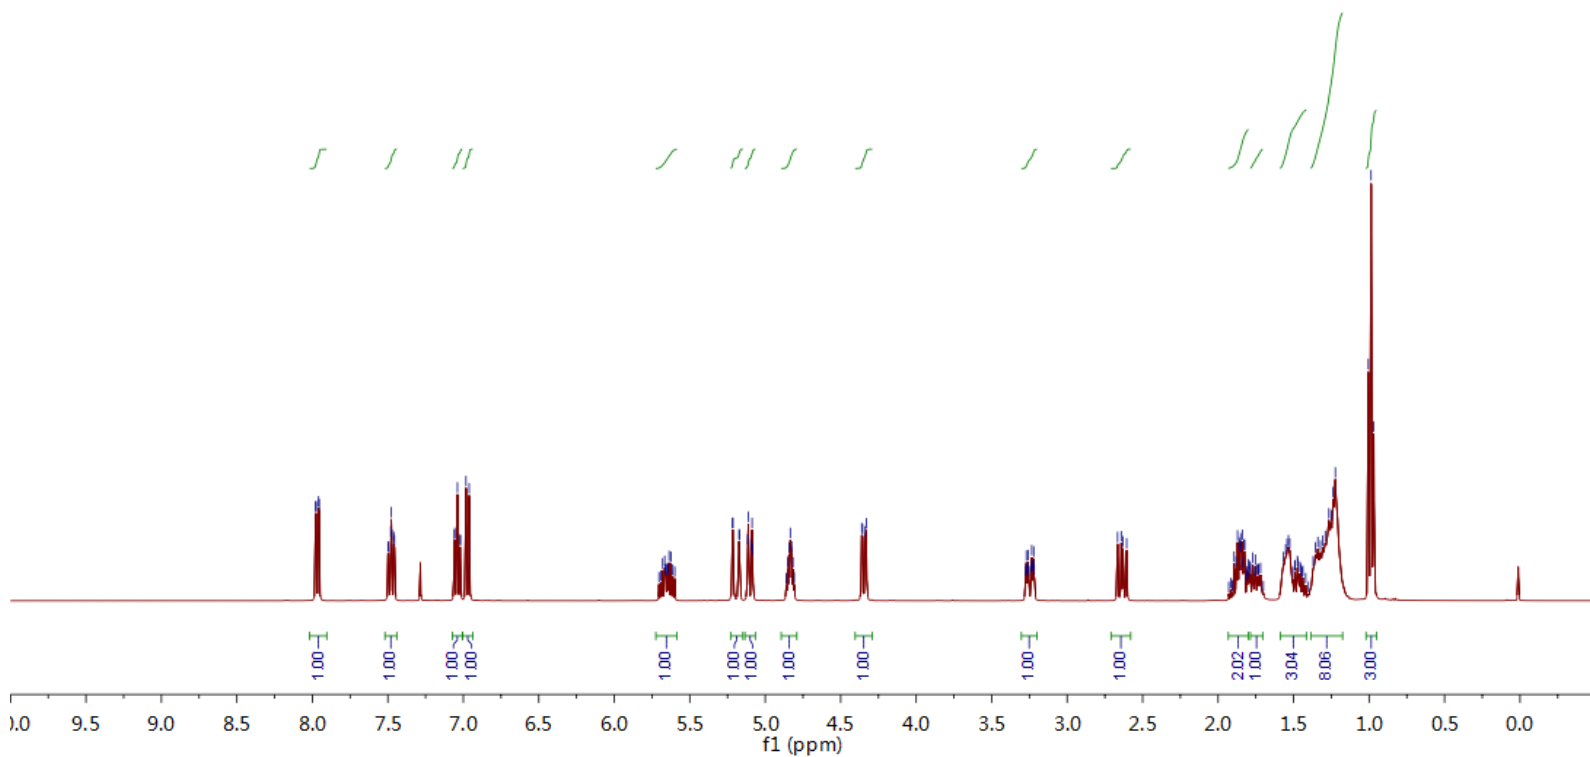

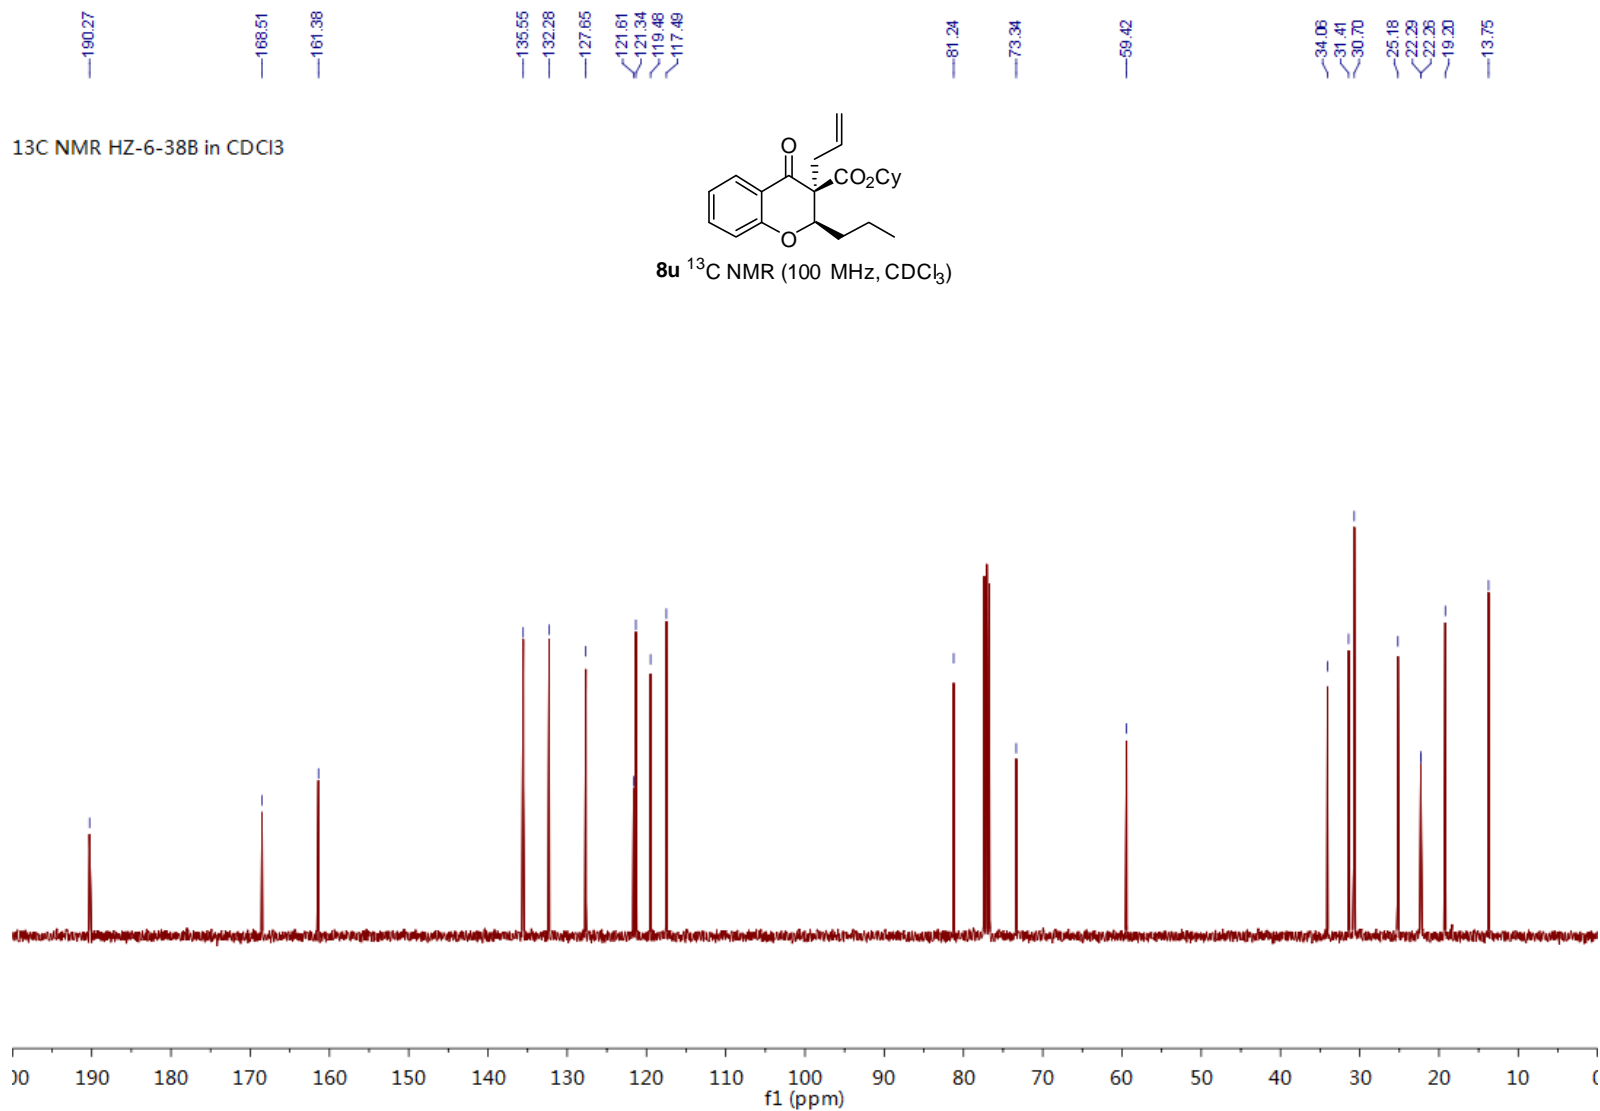

7.5716  
7.5674  
7.5545  
7.5509  
7.5482  
7.5464  
7.5166  
7.5144  
7.5007  
7.4980  
7.4952  
7.4756  
7.0522  
7.0496  
7.0322  
7.0127  
5.6506  
5.6379  
5.6329  
5.6256  
5.6203  
5.6130  
5.6080  
5.5953  
5.5830  
5.5704  
5.5291  
5.5159  
5.5145  
5.5114  
5.1754  
5.1733  
5.1719  
5.1688  
5.1183  
5.1141  
5.1100  
5.0929  
5.0888  
5.0847  
4.8632  
4.8547  
4.8463  
4.8379  
4.8295  
4.2876  
4.2835  
3.3491  
3.3449  
3.3404  
3.3366  
3.3323  
3.3280  
3.3126  
3.3063  
3.3038  
3.3002  
3.2868  
3.2915  
2.7374  
2.7129  
2.7008  
2.6763  
2.3337  
2.3297  
2.3164  
2.3125  
2.2993  
2.2953  
1.5783  
1.5631  
1.4741  
1.4656  
1.4428  
1.4175  
1.3028  
1.2833  
1.2171  
1.2102  
1.2015  
1.1885  
1.1786  
1.1608  
1.1434  
1.0497  
1.0328

<sup>1</sup>H NMR HZ-6-38C in CDCl<sub>3</sub>

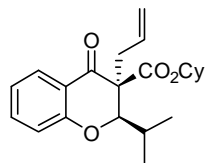

**8v** <sup>1</sup>H NMR (400 MHz, CDCl<sub>3</sub>)

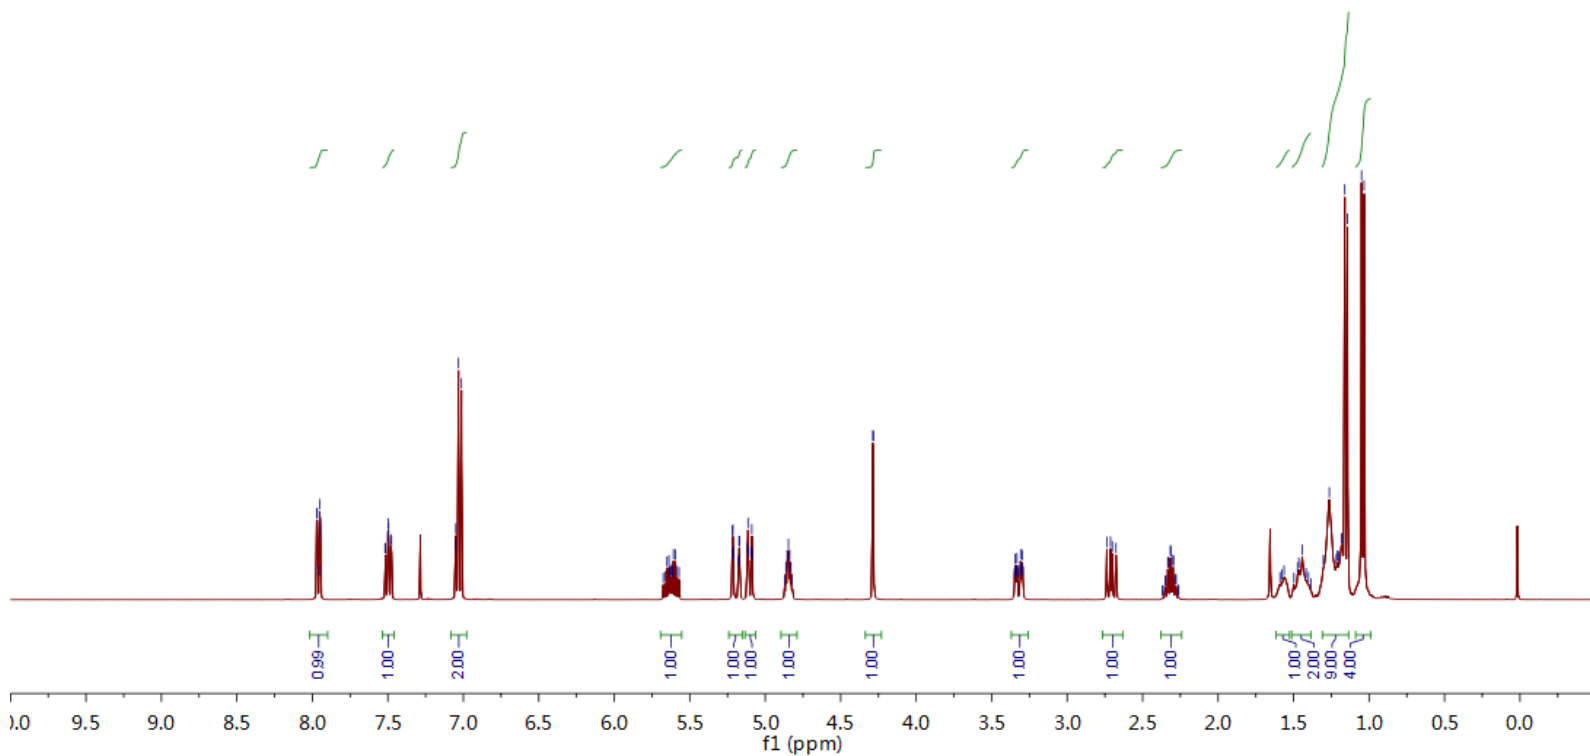

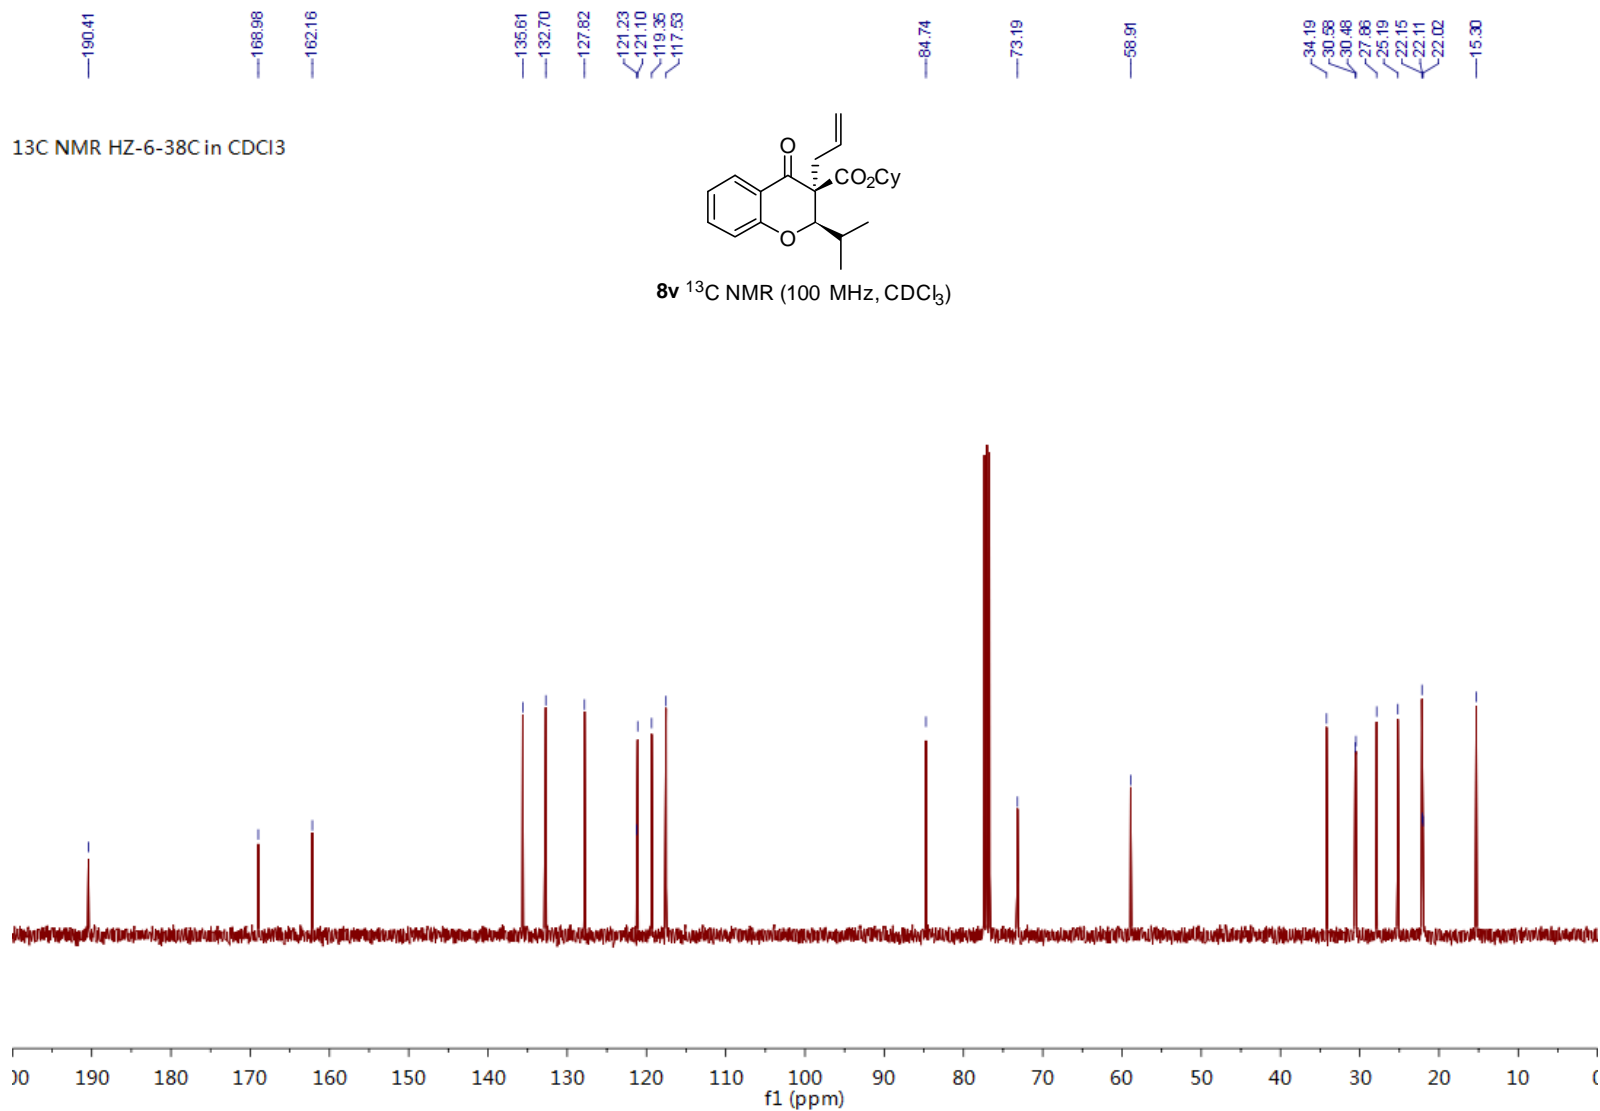

7.9627  
7.9586  
7.9432  
7.9380  
7.9119  
7.9075  
7.8836  
7.8902  
7.8731  
7.8688  
7.8442  
7.8420  
7.8221  
7.8043  
6.9998  
5.8543  
5.8411  
5.6233  
5.6118  
5.5986  
5.2094  
5.1671  
5.1103  
5.1054  
5.1024  
5.0850  
5.0811  
5.0771  
4.8644  
4.8598  
4.8473  
4.8389  
4.8303  
4.2311  
4.2278  
3.3303  
3.3261  
3.3215  
3.3173  
3.2978  
3.2938  
3.2896  
3.2850  
3.2809  
2.7521  
2.7279  
2.7156  
2.6914  
1.9441  
1.8306  
1.7983  
1.7822  
1.7609  
1.7193  
1.6896  
1.6811  
1.6494  
1.6408  
1.6186  
1.6088  
1.5890  
1.5799  
1.5743  
1.4846  
1.4783  
1.4549  
1.4340  
1.4271  
1.4096  
1.3954  
1.3841  
1.3742  
1.3622  
1.3520  
1.3294  
1.3193  
1.3109  
1.2885  
1.2786  
1.2627  
1.2569  
1.2196  
1.2118  
1.1888  
1.1814  
1.1664  
1.0829

<sup>1</sup>H NMR HZ-6-14C in CDCl<sub>3</sub>

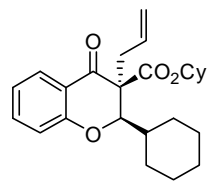

**8w** <sup>1</sup>H NMR (400 MHz, CDCl<sub>3</sub>)

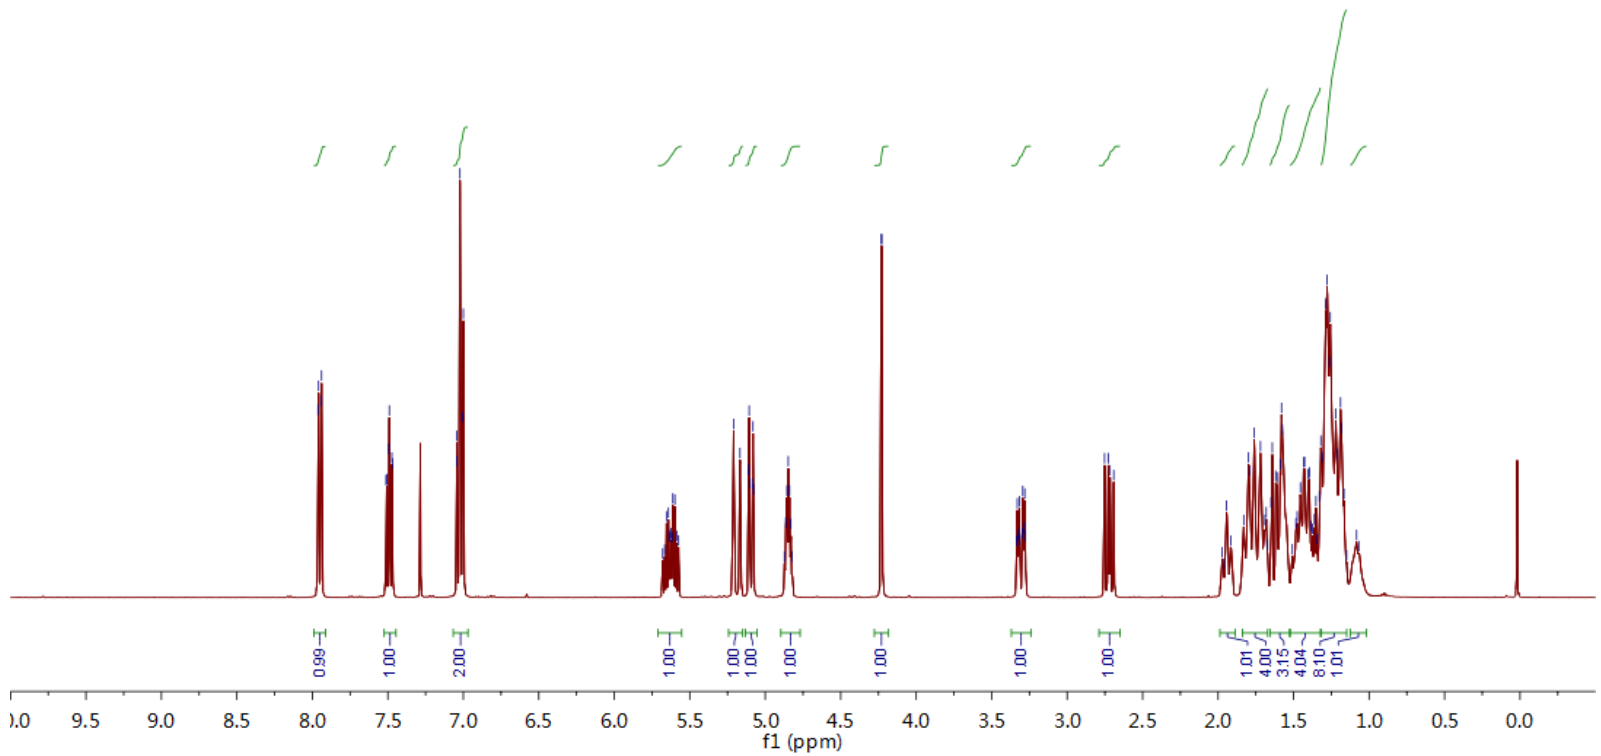

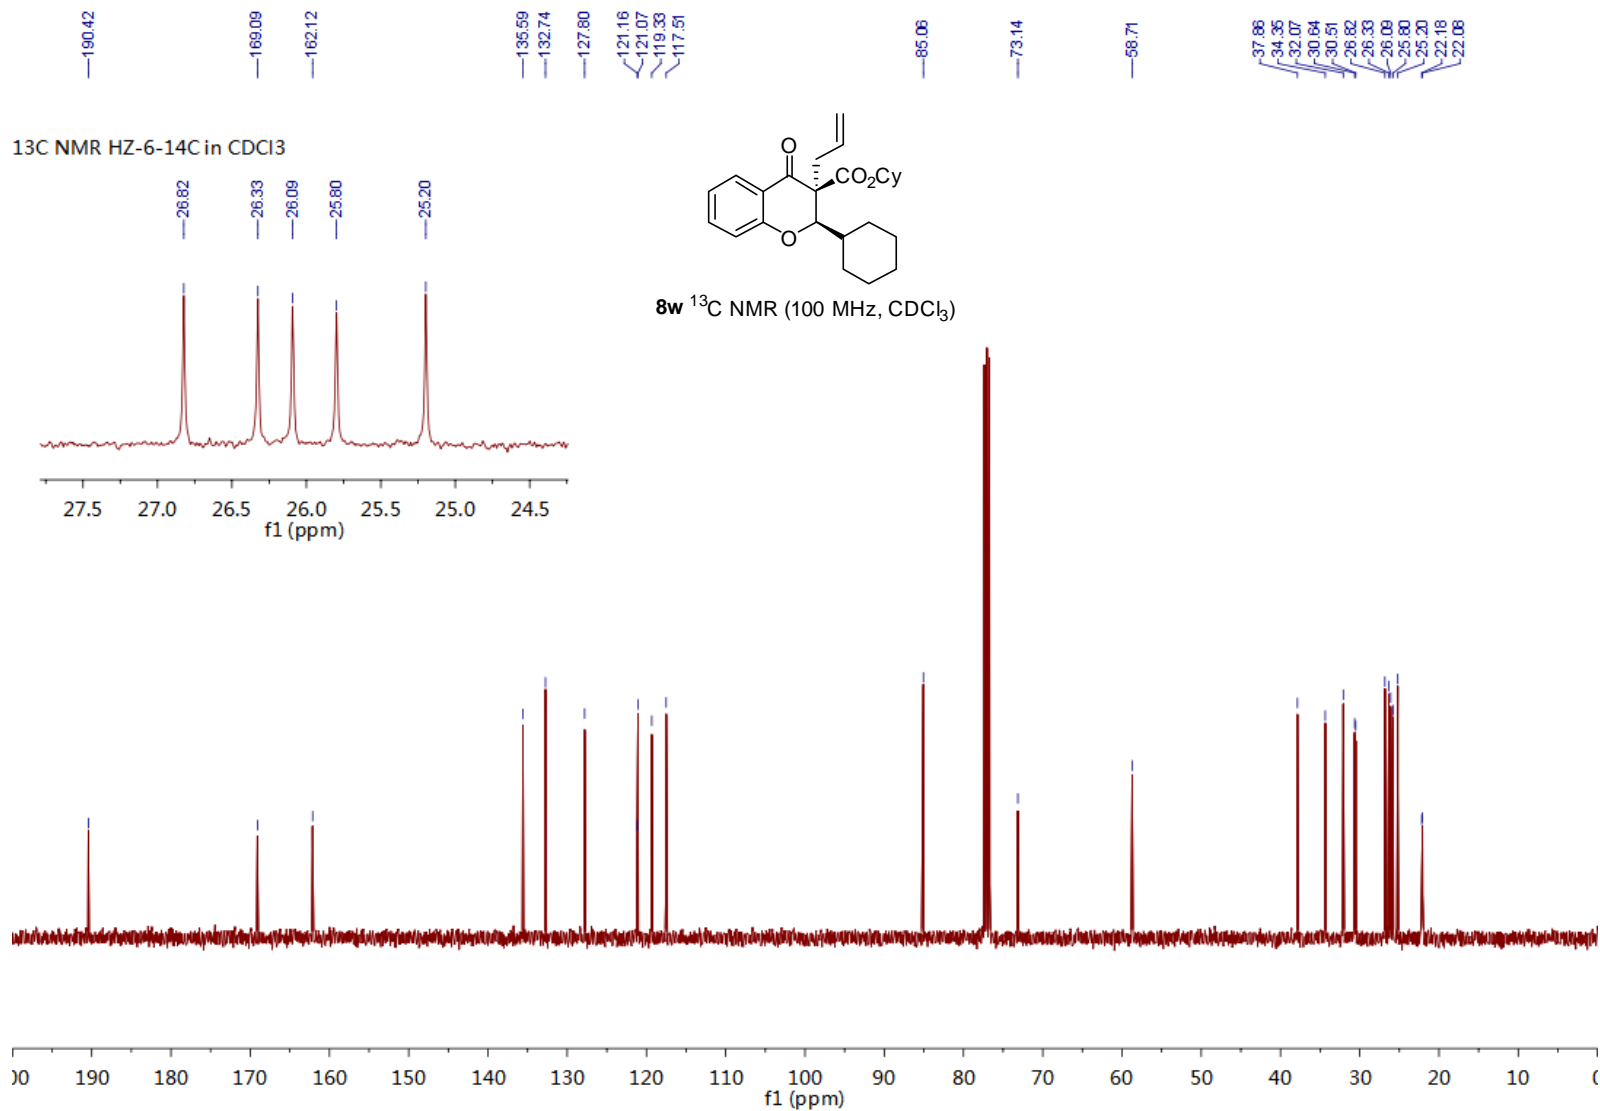

<sup>1</sup>H NMR HZ-6-49 in CDCl<sub>3</sub>

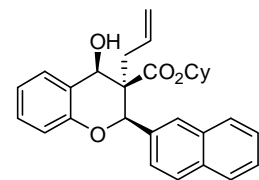

9 <sup>1</sup>H NMR (400 MHz, CDCl<sub>3</sub>)

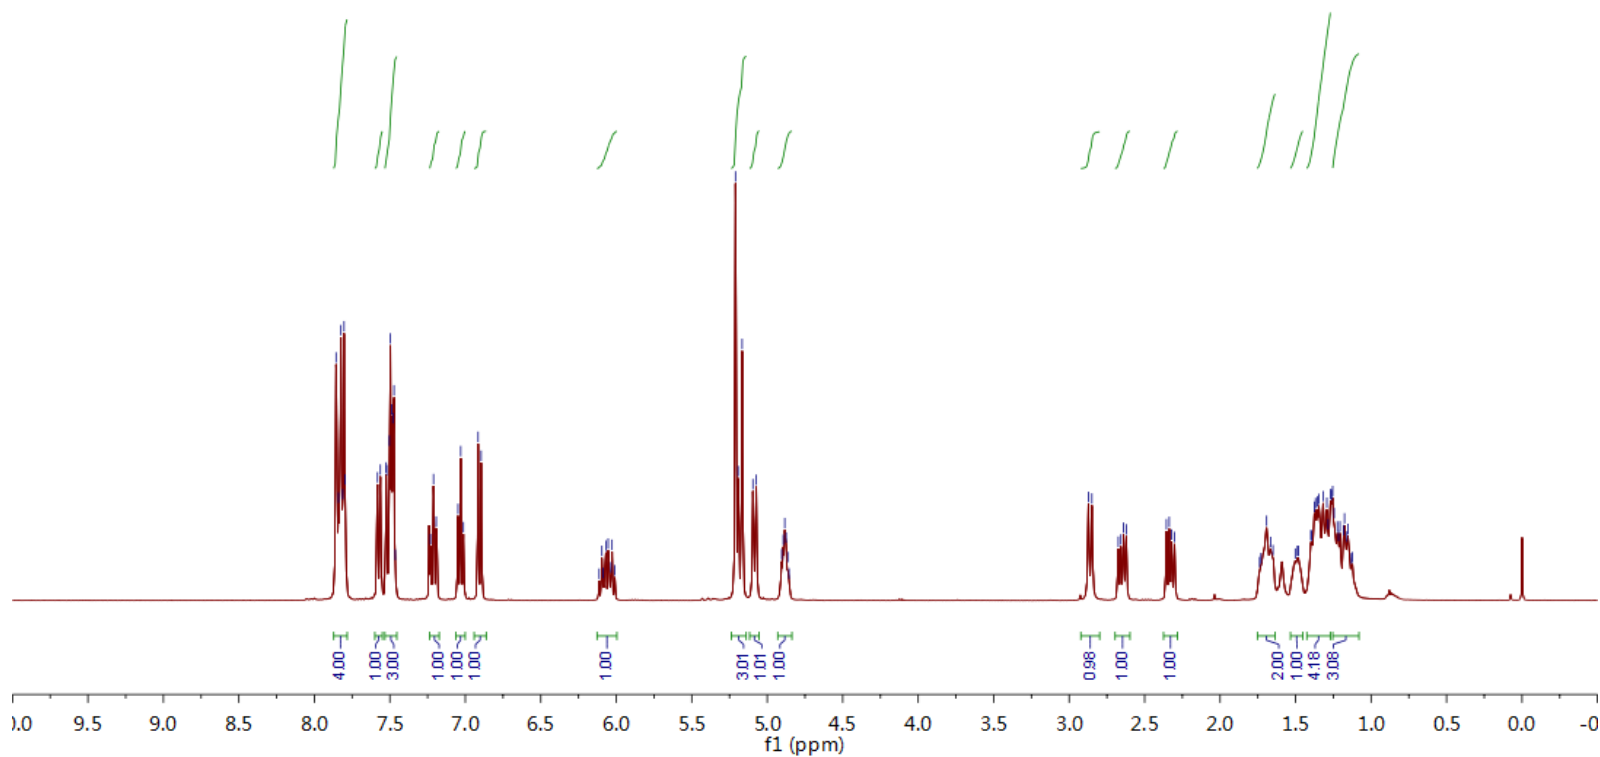

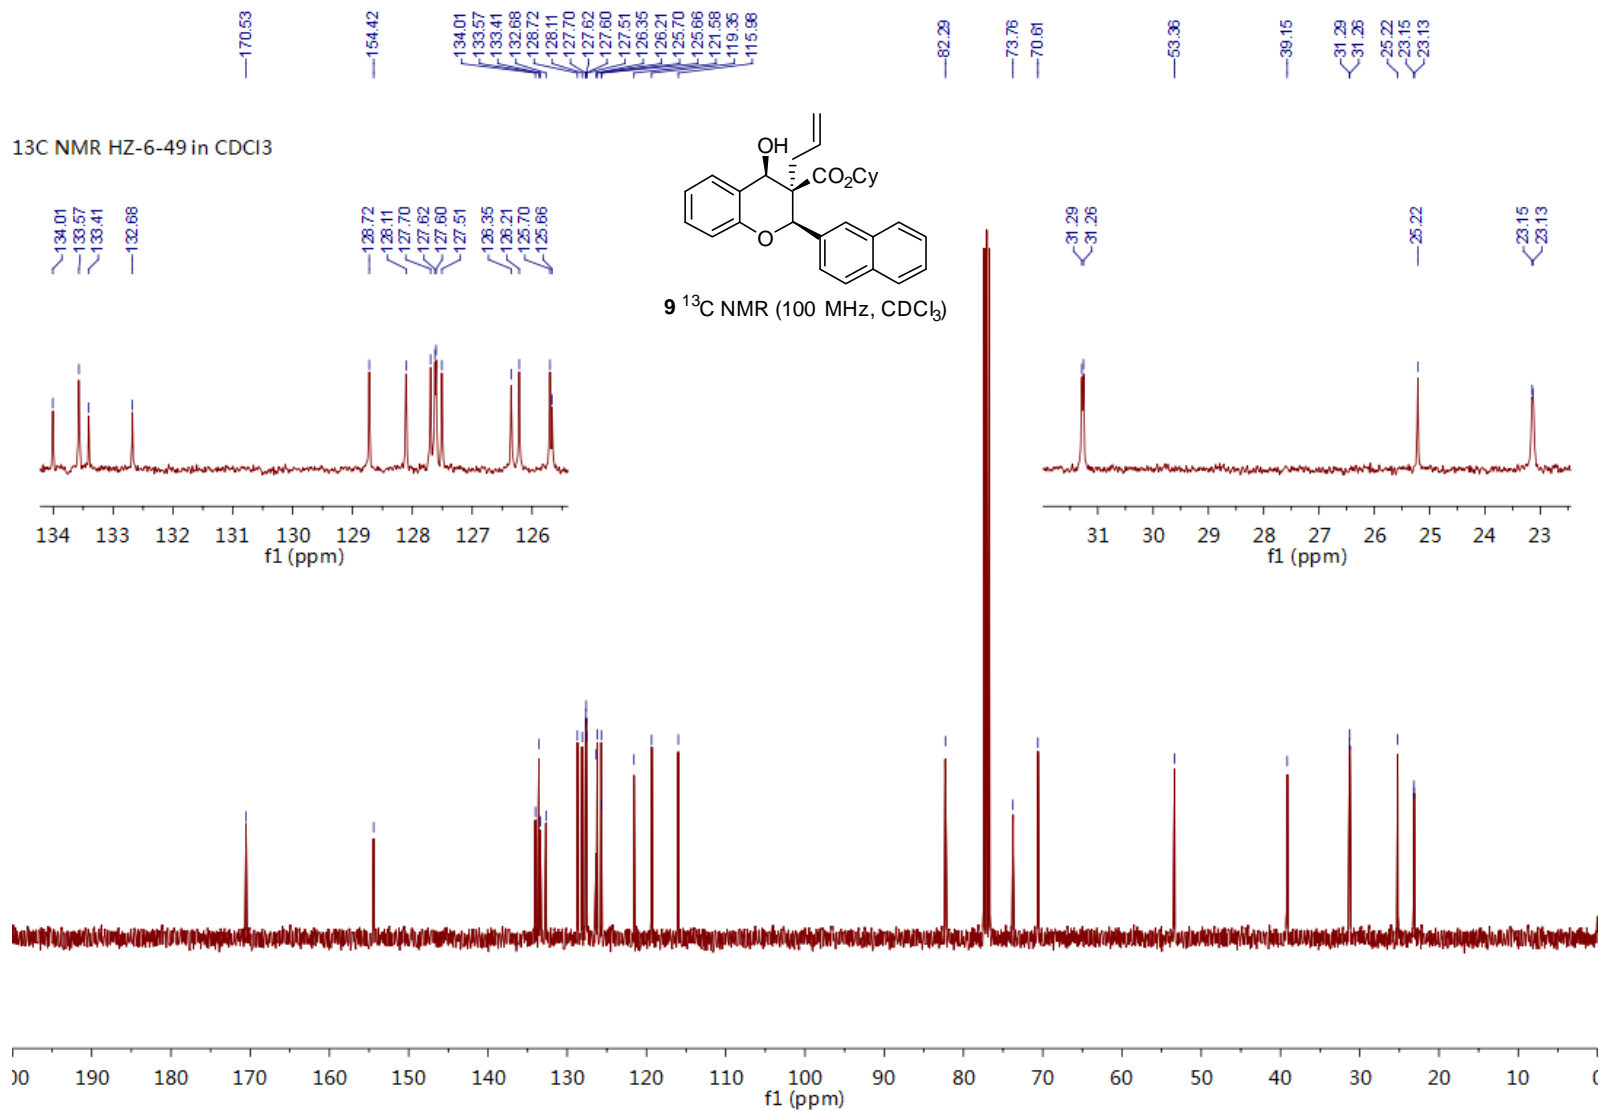



7.8911  
7.8993  
7.8510  
7.8352  
7.8281  
7.8133  
7.8059  
7.5264  
7.5160  
7.5112  
7.5062  
7.4879  
7.4820  
7.4816  
7.2961  
7.2926  
7.2846  
7.2733  
7.2575  
7.2539  
7.2410  
7.2222  
7.0150  
7.0123  
6.9934  
6.9881  
6.9747  
6.9688  
6.4164  
5.9783  
5.9725  
5.9684  
5.9523  
5.9472  
5.9360  
5.9310  
5.9262  
5.9148  
5.9107  
5.9049  
5.8895  
5.4426  
5.1866  
5.1648  
5.1256  
5.0175  
5.0080  
4.9989  
4.9888  
4.9802  
2.6052  
2.5898  
2.5690  
2.5537  
2.3067  
2.2875  
2.2725  
2.2513  
1.9291  
1.7789  
1.7705  
1.7597  
1.7492  
1.7386  
1.6895  
1.6617  
1.6504  
1.6409  
1.6303  
1.6200  
1.6086  
1.6009  
1.6009  
1.4804  
1.4780  
1.4697  
1.4549  
1.4258  
1.4024  
1.3783  
1.3682  
1.3530  
1.3291  
1.3145  
1.2489  
1.2253  
1.2007

<sup>1</sup>H NMR HZ-6-53 in CDCl<sub>3</sub>

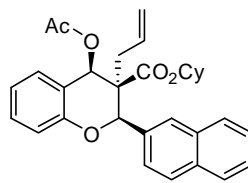

**10** <sup>1</sup>H NMR (400 MHz, CDCl<sub>3</sub>)

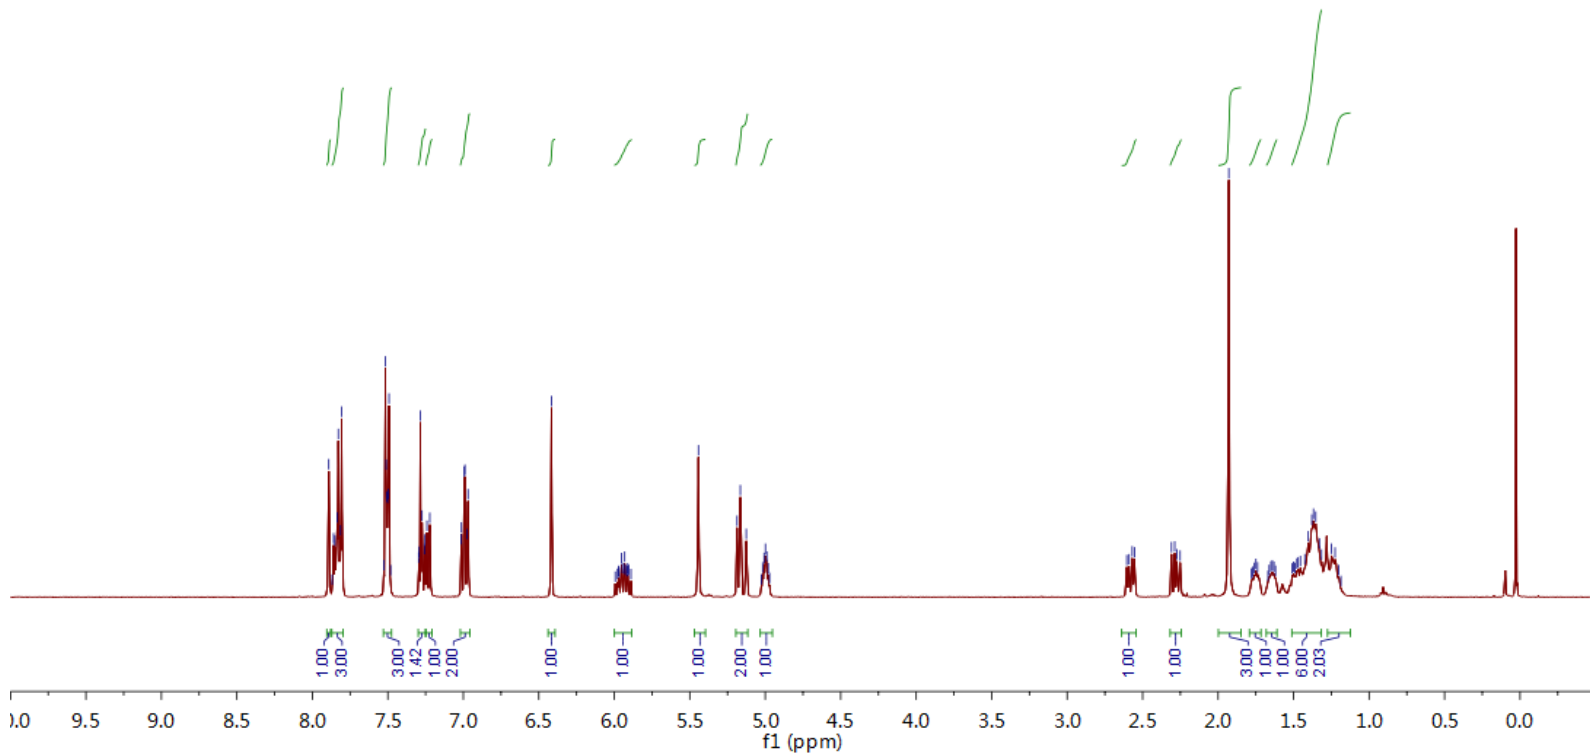

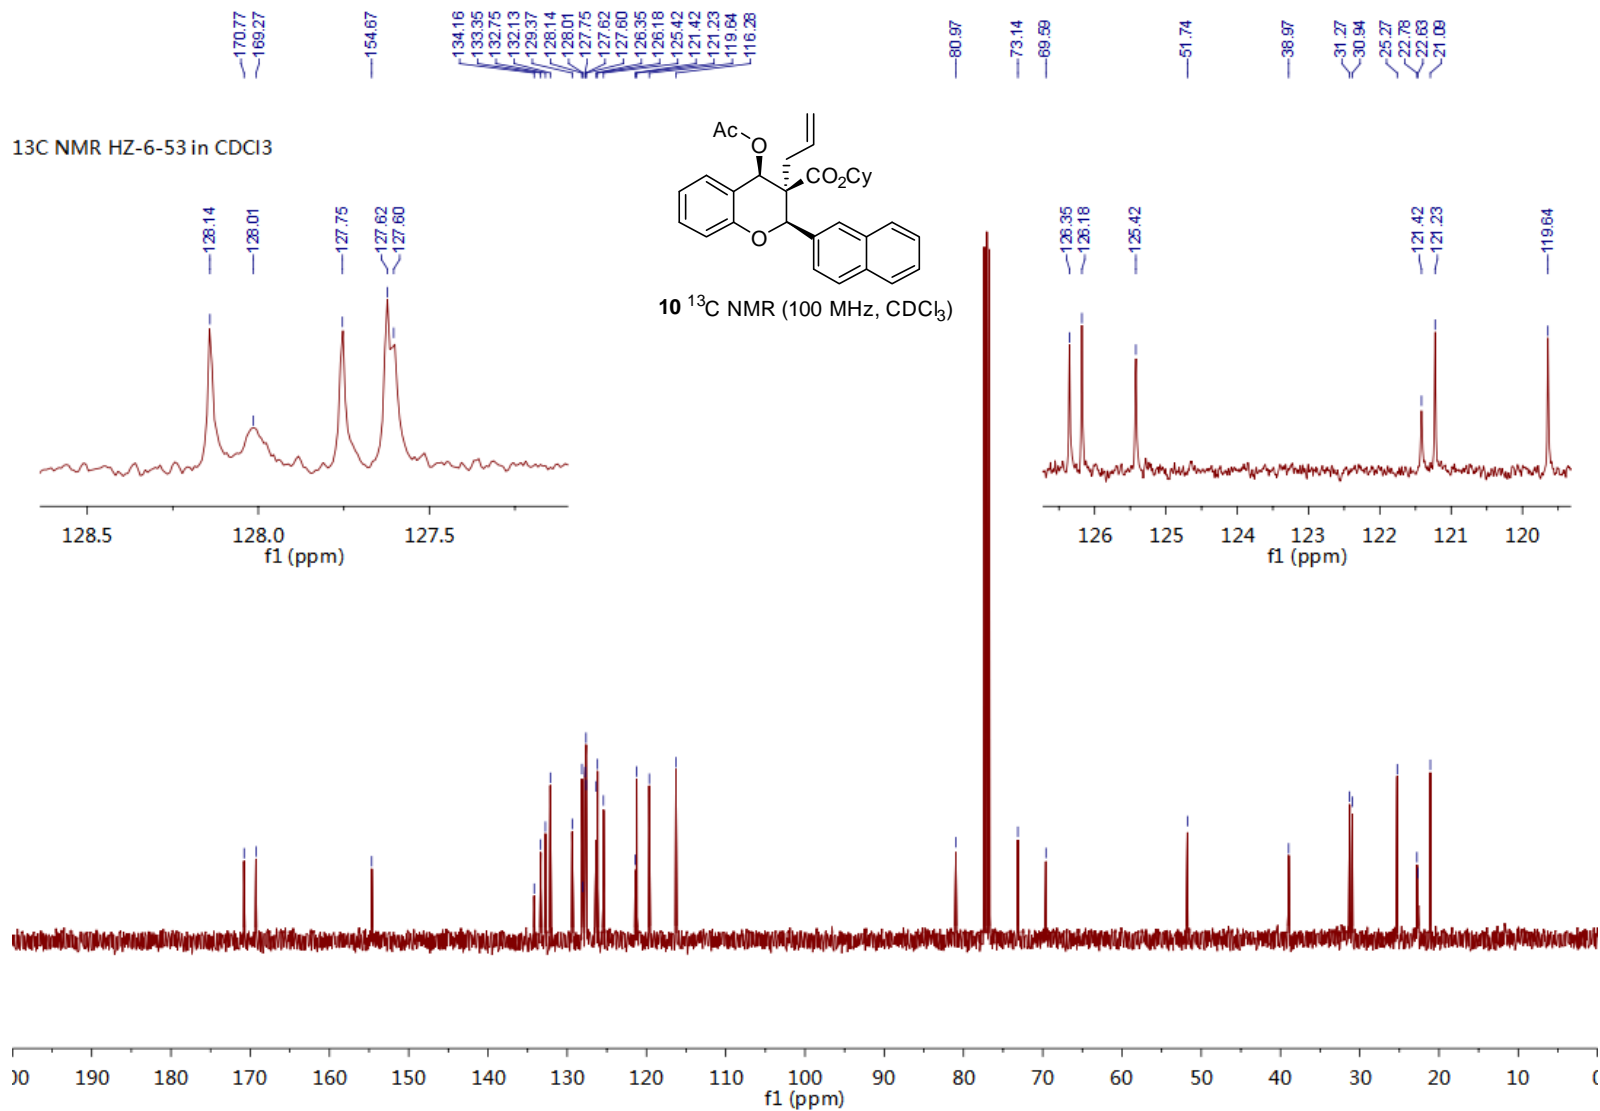

1H NMR HZ-6-55 in CDCl3

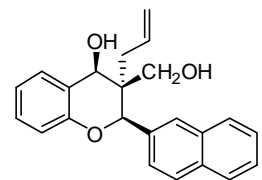

11 <sup>1</sup>H NMR (400 MHz, CDCl<sub>3</sub>)

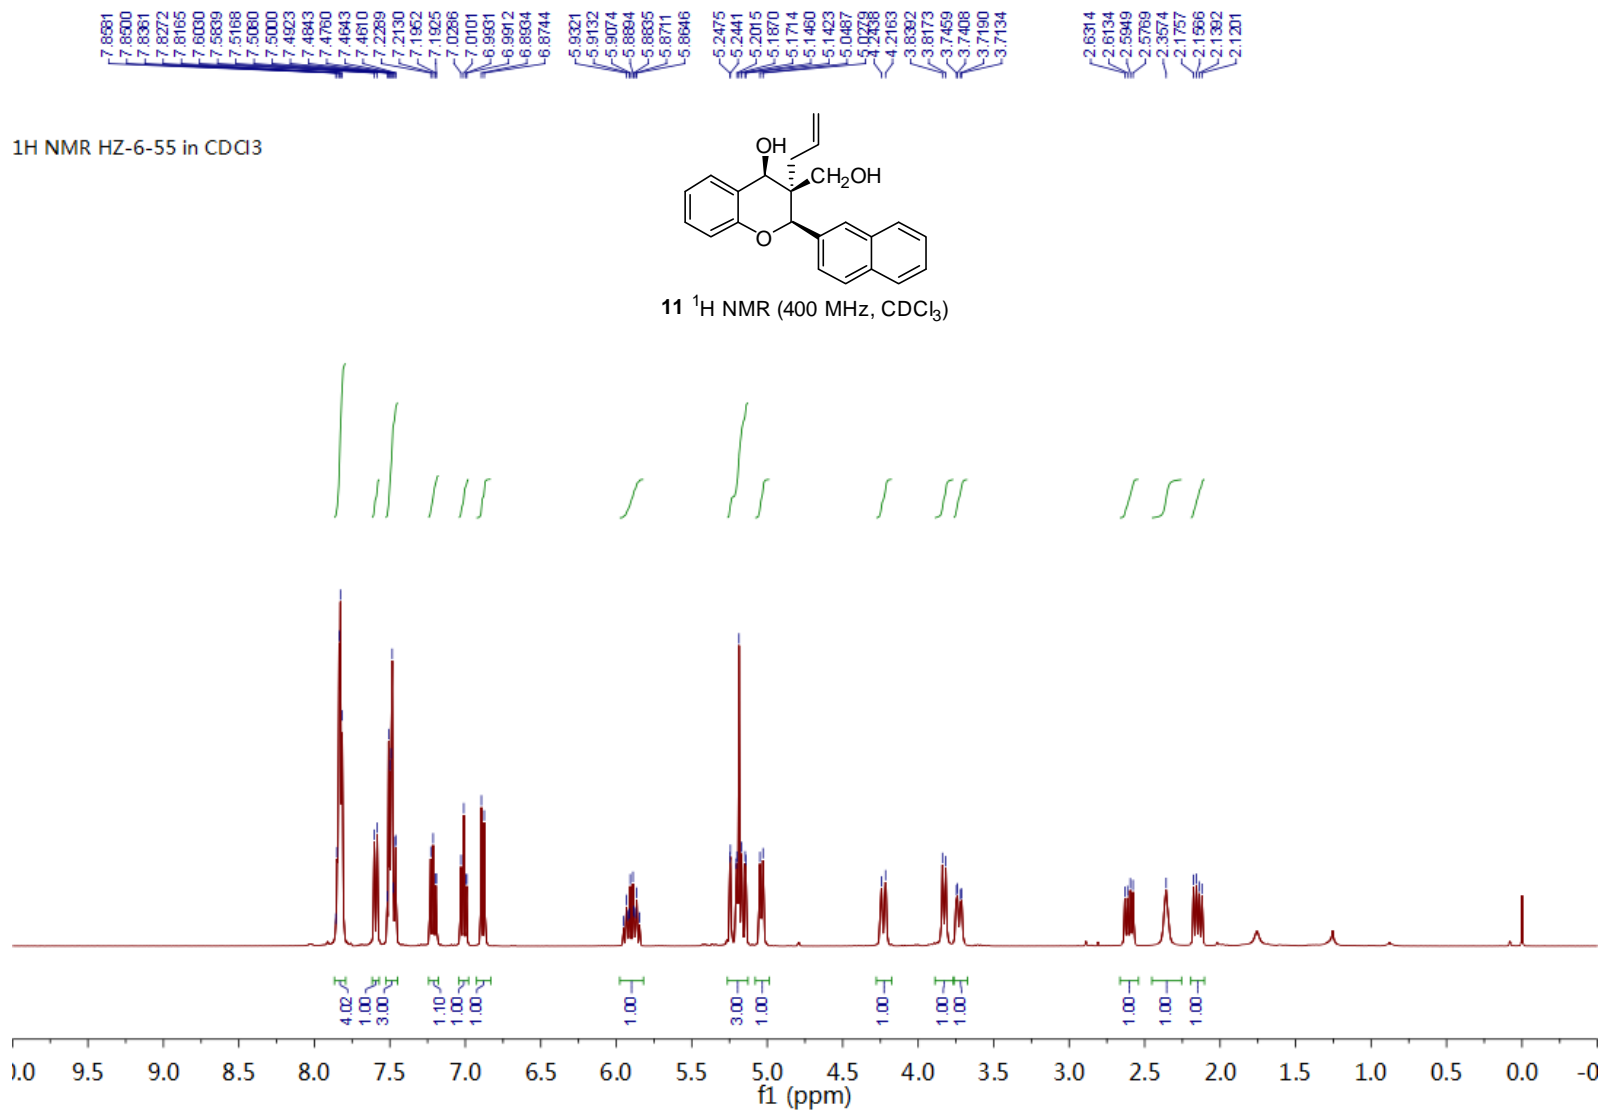

<sup>13</sup>C NMR HZ-6-55 in CDCl<sub>3</sub>

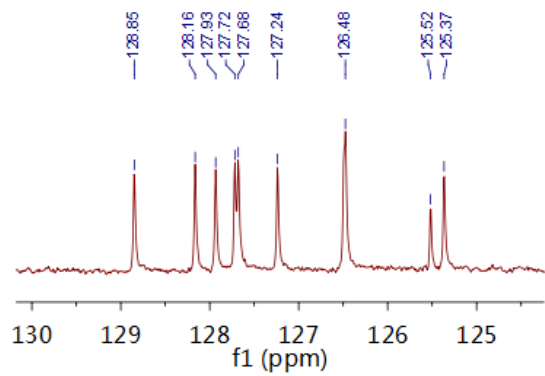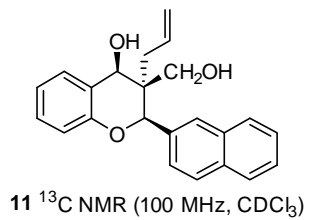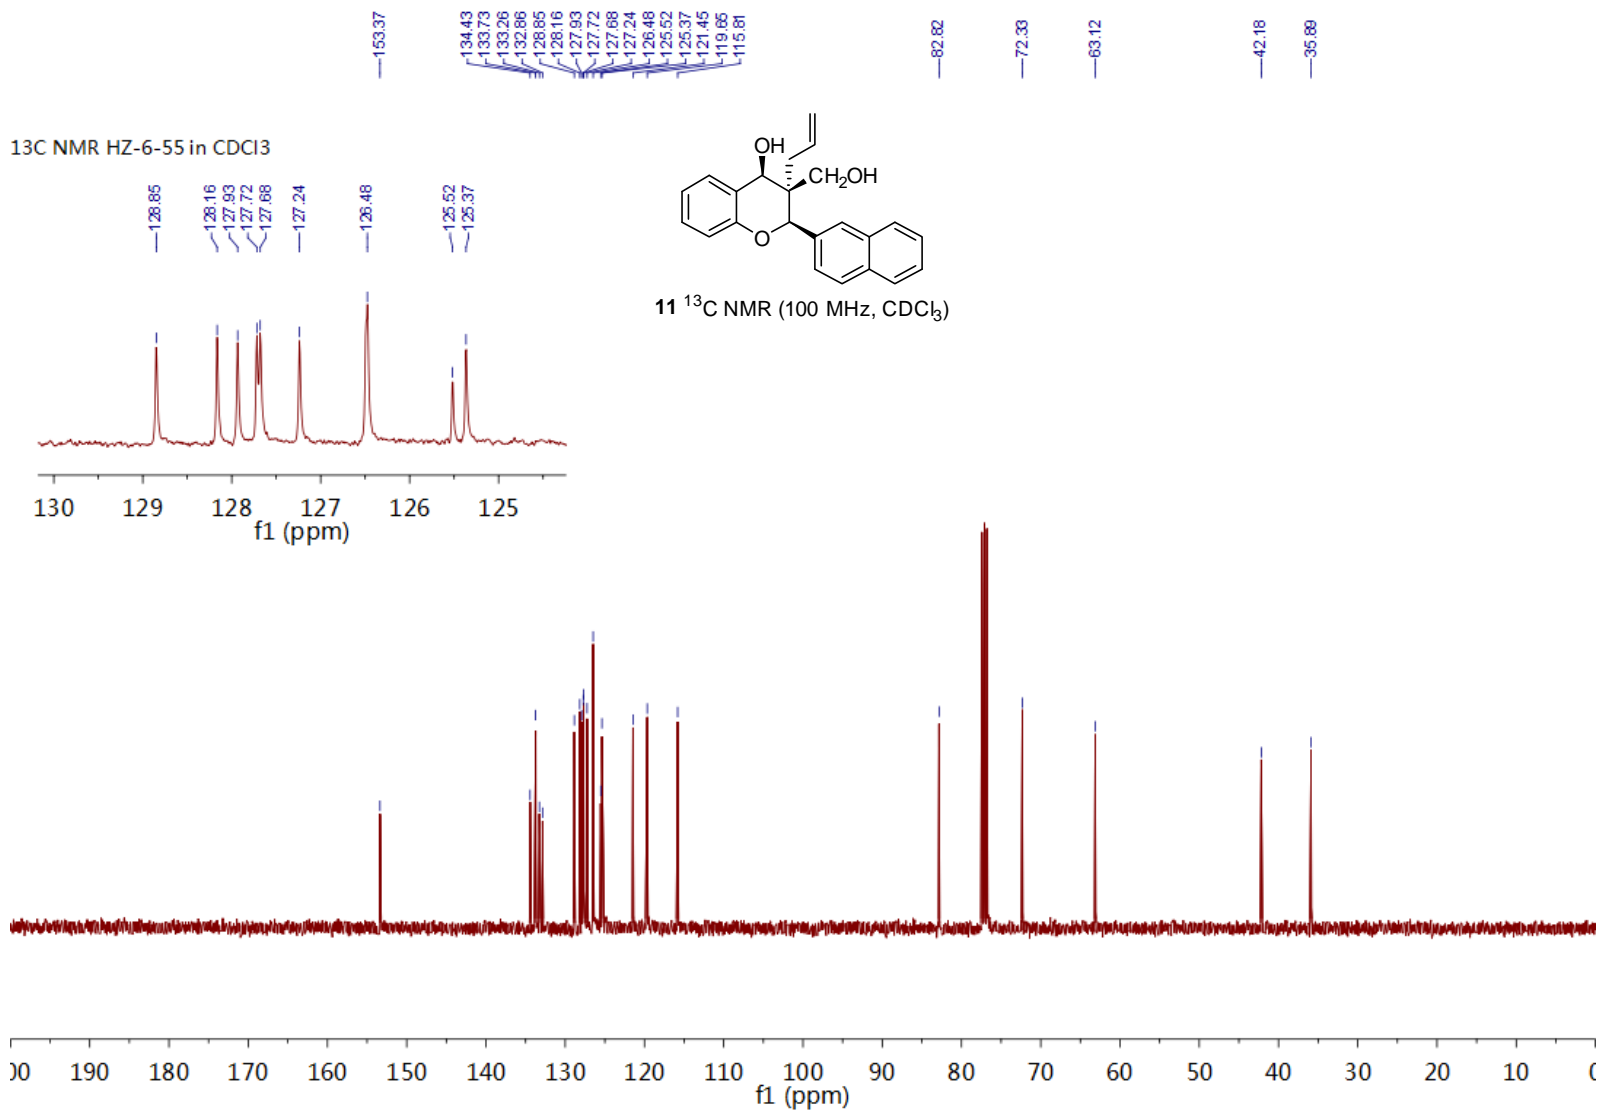

$^1\text{H}$  NMR HZ-6-61 in  $\text{CDCl}_3$

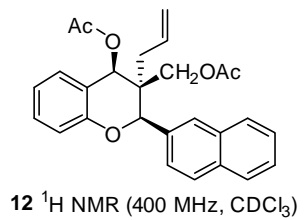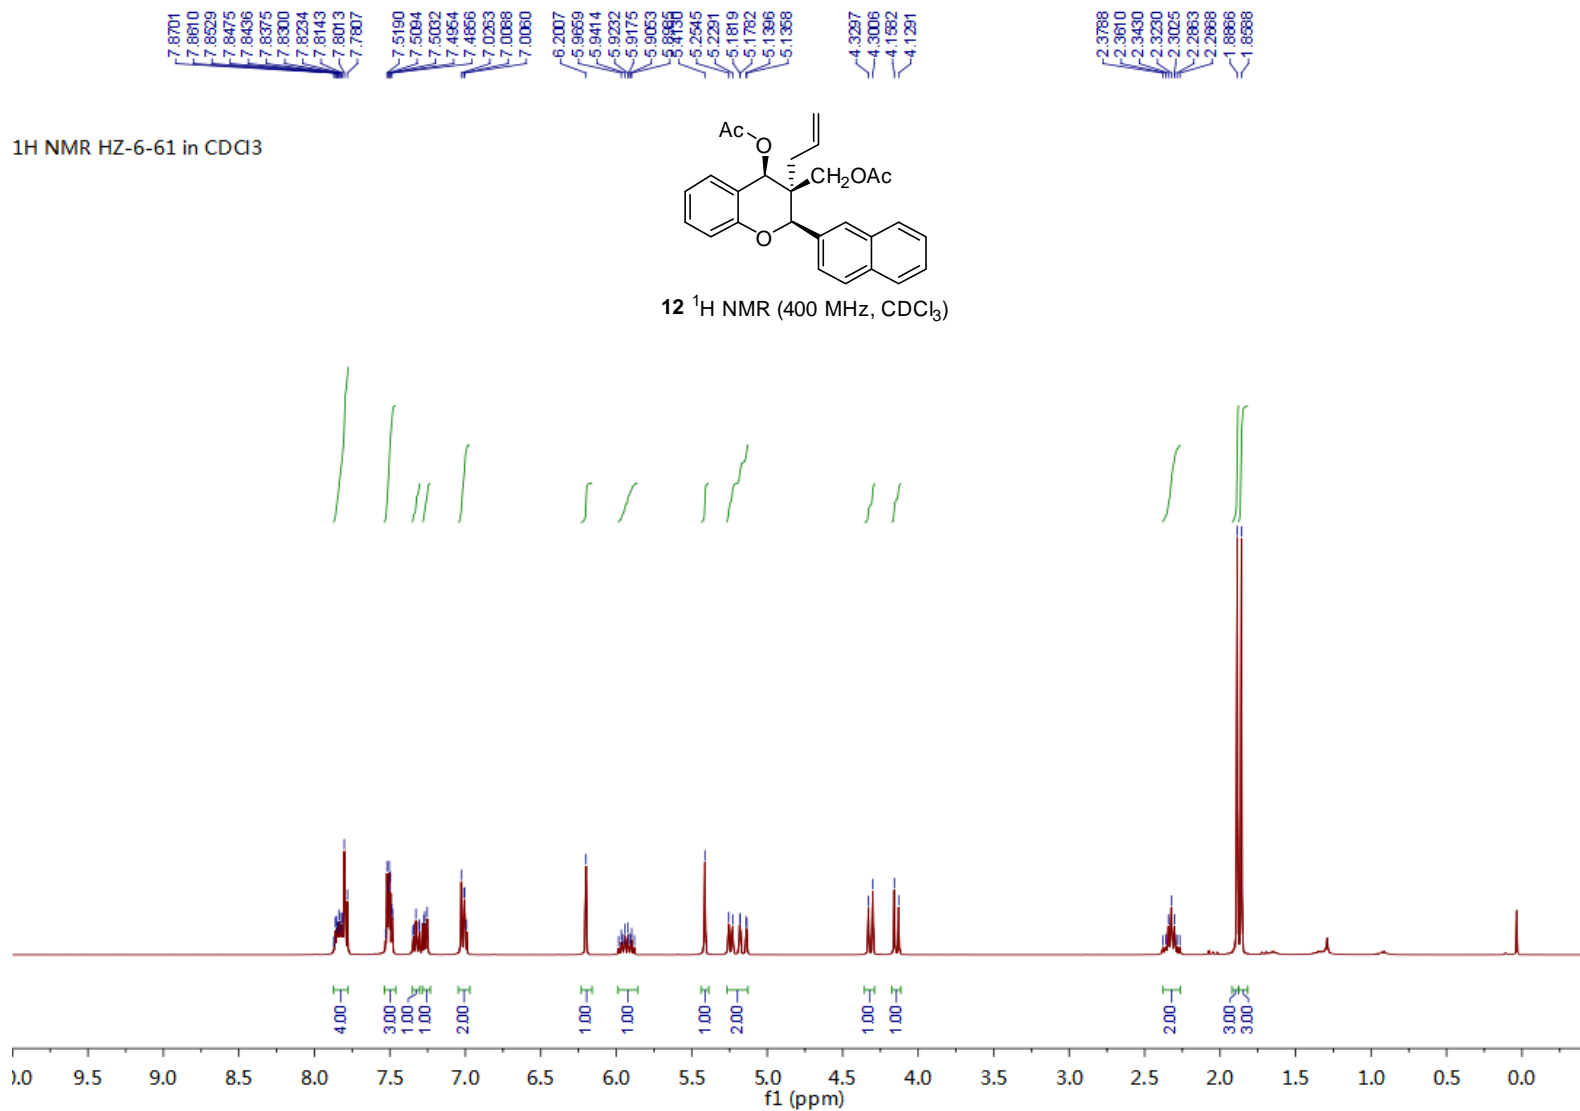

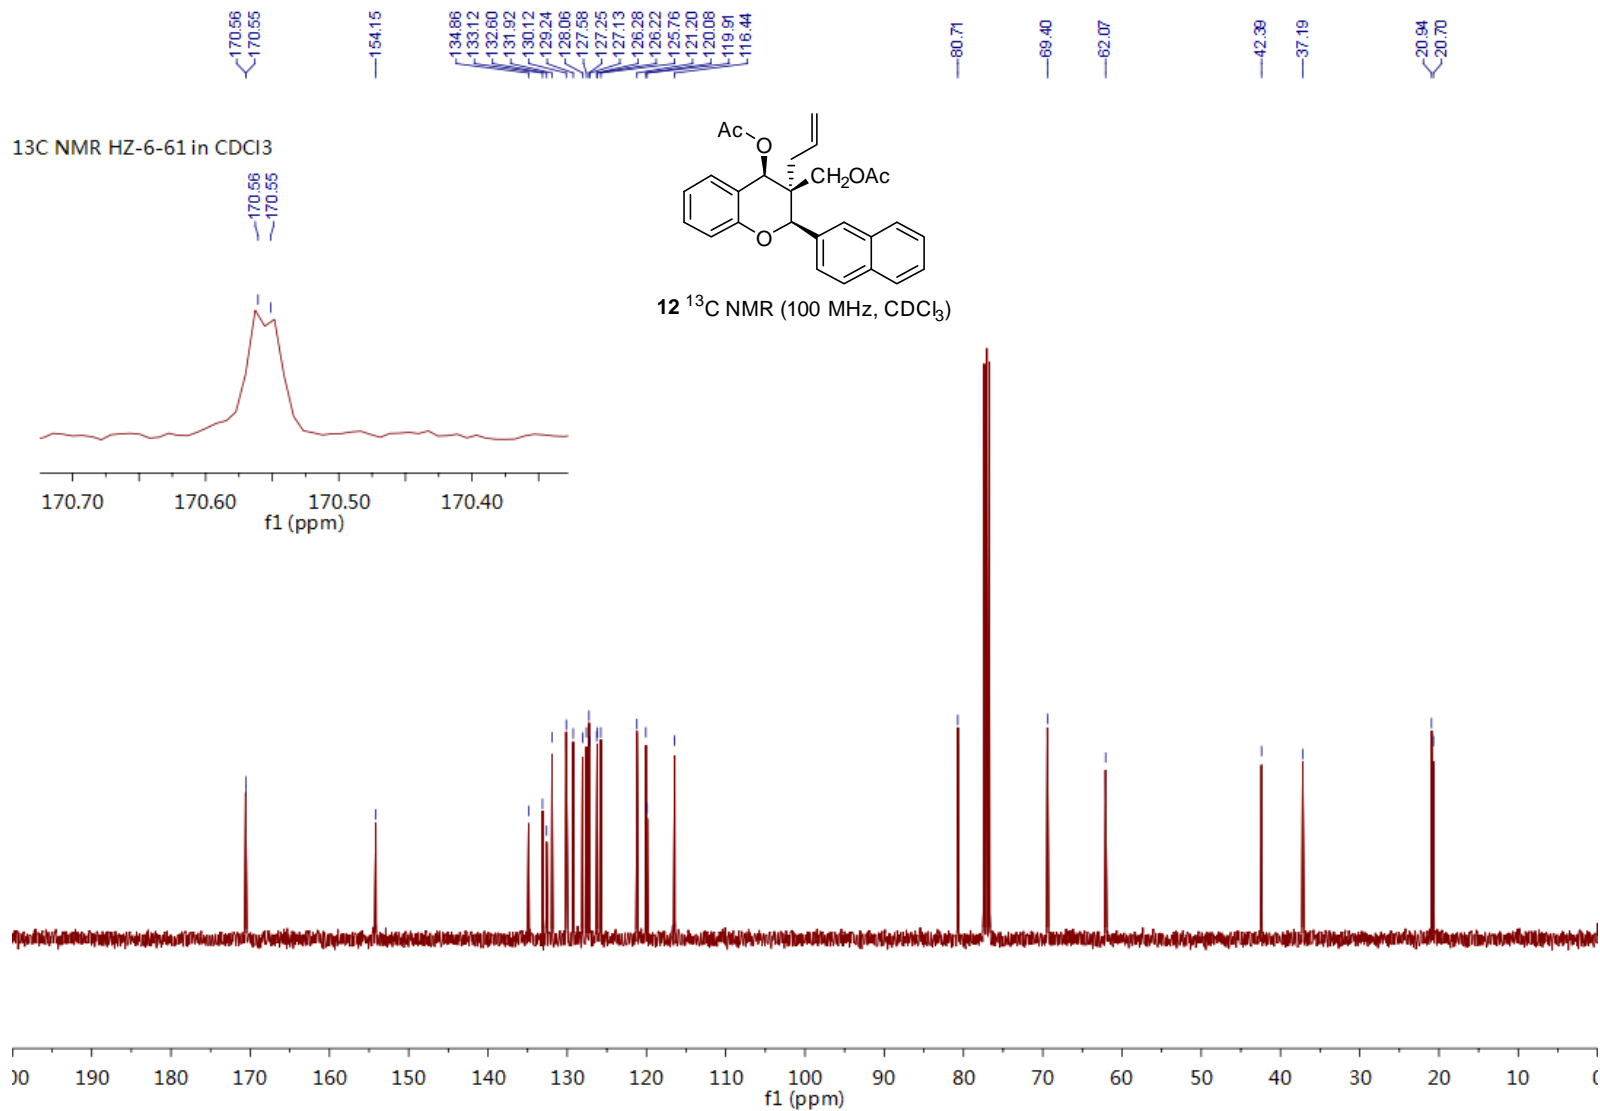

Data File C:\DOCUMENTS AND SETTINGS\ADMINISTRATOR\DESKTOP\HZ1\SIG1002597.D  
 Sample Name: HZ-5-37A(+)

=====  
 Acq. Operator :  
 Acq. Instrument : 仪器 1 Location : Vial 1  
 Injection Date : 2/28/2019 3:04:25 PM Inj Volume : 5.000 µl  
 Acq. Method : C:\CHEM32\1\METHODS\DEF\_LC11.M  
 Last changed : 2/28/2019 1:53:34 PM  
 (modified after loading)  
 Analysis Method : C:\CHEM32\1\METHODS\DEF\_LC11.M  
 Last changed : 7/12/2019 8:12:15 AM  
 (modified after loading)  
 Sample Info : AD-H, n-hexane/i-PrOH =99/1, 0.7 mL/min, 30 oC, 254 nm

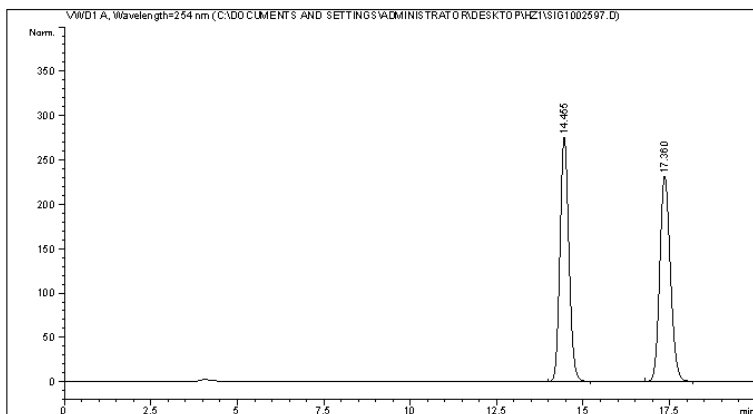

=====  
 Area Percent Report  
 =====

Sorted By : Signal  
 Multiplier: : 1.0000  
 Dilution: : 1.0000  
 Use Multiplier & Dilution Factor with ISTDs

Signal 1: VWD1 A, Wavelength=254 nm

| Peak # | RetTime [min] | Type | Width [min] | Area [mAU*s] | Height [mAU] | Area %  |
|--------|---------------|------|-------------|--------------|--------------|---------|
| 1      | 14.455        | BB   | 0.2773      | 4933.59668   | 274.98660    | 49.9969 |
| 2      | 17.360        | VB   | 0.3308      | 4934.21094   | 231.37503    | 50.0031 |

Totals : 9867.80762 506.36163

=====  
 \*\*\* End of Report \*\*\*

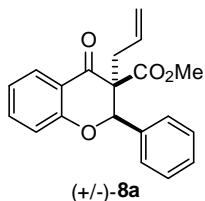

Data File C:\DOCUMENTS AND SETTINGS\ADMINISTRATOR\DESKTOP\HZ1\SIG1002599.D  
 Sample Name: HZ-5-39A

=====  
 Acq. Operator :  
 Acq. Instrument : 仪器 1 Location : Vial 1  
 Injection Date : 2/28/2019 7:53:54 PM Inj Volume : 5.000 µl  
 Acq. Method : C:\CHEM32\1\METHODS\DEF\_LC11.M  
 Last changed : 2/28/2019 7:17:11 PM  
 (modified after loading)  
 Analysis Method : C:\CHEM32\1\METHODS\DEF\_LC11.M  
 Last changed : 7/12/2019 8:12:15 AM  
 (modified after loading)  
 Sample Info : AD-H, n-hexane/i-PrOH =99/1, 0.7 mL/min, 30 oC, 254 nm

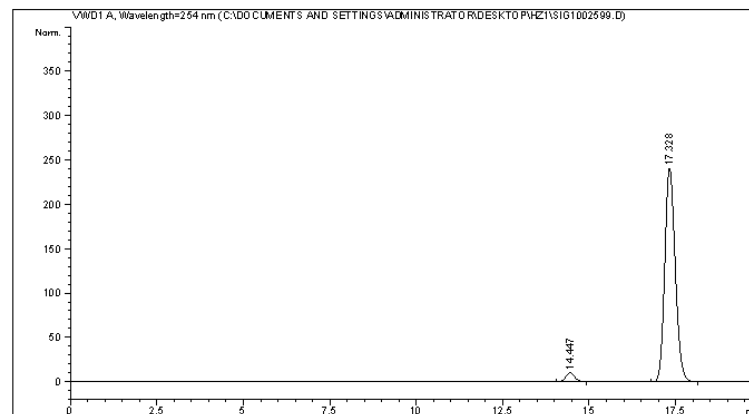

=====  
 Area Percent Report  
 =====

Sorted By : Signal  
 Multiplier: : 1.0000  
 Dilution: : 1.0000  
 Use Multiplier & Dilution Factor with ISTDs

Signal 1: VWD1 A, Wavelength=254 nm

| Peak # | RetTime [min] | Type | Width [min] | Area [mAU*s] | Height [mAU] | Area %  |
|--------|---------------|------|-------------|--------------|--------------|---------|
| 1      | 14.447        | BB   | 0.2784      | 185.19722    | 10.31643     | 3.5243  |
| 2      | 17.328        | BB   | 0.3267      | 5069.73975   | 240.73480    | 96.4757 |

Totals : 5254.93697 251.05124

=====  
 \*\*\* End of Report \*\*\*

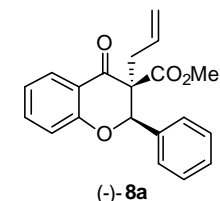

Data File C:\CHEM32\1\DATA\ZHOU-19\YZN011763.D  
 Sample Name: HZ-5-36(+)

=====  
 Acq. Operator :  
 Acq. Instrument : Instrument 1 Location : -  
 Injection Date : 2/25/2019 2:45:20 PM  
 Acq. Method : C:\CHEM32\1\METHODS\DEF\_LC11.M  
 Last changed : 2/25/2019 2:40:09 PM  
 (modified after loading)  
 Analysis Method : C:\CHEM32\1\METHODS\DEF\_LC11.M  
 Last changed : 7/12/2019 8:03:12 AM  
 (modified after loading)  
 Sample Info : AD-H, Hexane/i-PrOH = 99/1, 0.7 mL/min, 30 oC, 254 nm

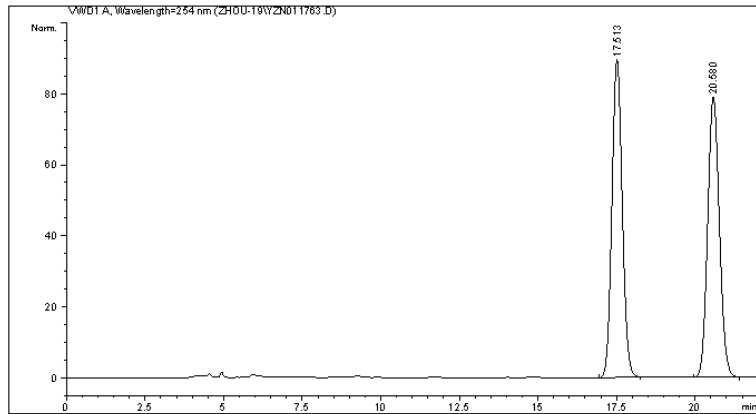

=====  
 Area Percent Report  
 =====

Sorted By : Signal  
 Multiplier: : 1.0000  
 Dilution: : 1.0000  
 Use Multiplier & Dilution Factor with ISTDs

Signal 1: VWD1 A, Wavelength=254 nm

| Peak # | RetTime [min] | Type | Width [min] | Area [mAU] | Height [%s] | Area [%] |
|--------|---------------|------|-------------|------------|-------------|----------|
| 1      | 17.513        | BB   | 0.3555      | 2046.39795 | 89.52306    | 50.0331  |
| 2      | 20.580        | BB   | 0.4024      | 2043.68945 | 78.96239    | 49.9669  |

Totals : 4090.08740 168.48546

=====  
 \*\*\* End of Report \*\*\*

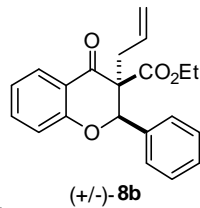

Data File C:\CHEM32\1\DATA\ZHOU-19\YZN011762.D  
 Sample Name: HZ-5-36

=====  
 Acq. Operator :  
 Acq. Instrument : Instrument 1 Location : -  
 Injection Date : 2/25/2019 2:15:01 PM  
 Acq. Method : C:\CHEM32\1\METHODS\DEF\_LC11.M  
 Last changed : 2/25/2019 1:38:10 PM  
 (modified after loading)  
 Analysis Method : C:\CHEM32\1\METHODS\DEF\_LC11.M  
 Last changed : 7/12/2019 8:01:48 AM  
 (modified after loading)  
 Sample Info : AD-H, Hexane/i-PrOH = 99/1, 0.7 mL/min, 30 oC, 254 nm

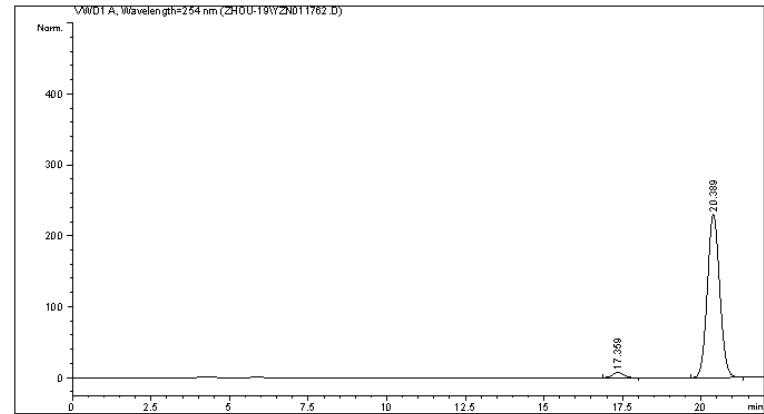

=====  
 Area Percent Report  
 =====

Sorted By : Signal  
 Multiplier: : 1.0000  
 Dilution: : 1.0000  
 Use Multiplier & Dilution Factor with ISTDs

Signal 1: VWD1 A, Wavelength=254 nm

| Peak # | RetTime [min] | Type | Width [min] | Area [mAU] | Height [%s] | Area [%] |
|--------|---------------|------|-------------|------------|-------------|----------|
| 1      | 17.359        | BB   | 0.3774      | 173.96945  | 7.17867     | 2.6987   |
| 2      | 20.389        | BB   | 0.4247      | 6272.43555 | 229.80196   | 97.3013  |

Totals : 6446.40500 236.98063

=====  
 \*\*\* End of Report \*\*\*

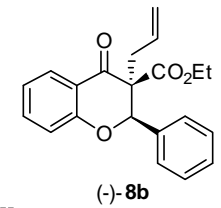



Data File C:\DOCUMENTS AND SETTINGS\ADMINISTRATOR\DESKTOP\HZ1\SIG1002833.D  
 Sample Name: HZ-5-69A+

=====  
 Acq. Operator :  
 Acq. Instrument : 仪器 1 Location : Vial 1  
 Injection Date : 3/31/2019 5:20:11 PM Inj Volume : 5.000 µl  
 Acq. Method : C:\CHEM32\1\METHODS\DEF\_LC11.M  
 Last changed : 3/31/2019 5:17:33 PM  
 (modified after loading)  
 Analysis Method : C:\CHEM32\1\METHODS\DEF\_LC11.M  
 Last changed : 7/12/2019 8:18:10 AM  
 (modified after loading)  
 Sample Info : AD-H, n-hexane/i-PrOH = 99/1, 0.7 mL/min, 30 oC, 254 nm

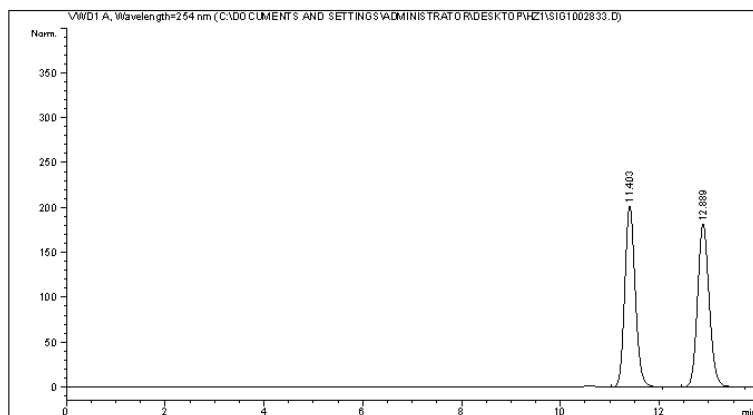

=====  
 Area Percent Report  
 =====

Sorted By : Signal  
 Multiplier: : 1.0000  
 Dilution: : 1.0000  
 Use Multiplier & Dilution Factor with ISTDs

Signal 1: VWD1 A, Wavelength=254 nm

| Peak # | RetTime [min] | Type | Width [min] | Area [mAU*s] | Height [mAU] | Area %  |
|--------|---------------|------|-------------|--------------|--------------|---------|
| 1      | 11.403        | BB   | 0.2257      | 2953.02173   | 201.81802    | 49.8932 |
| 2      | 12.889        | BB   | 0.2528      | 2965.66919   | 181.30154    | 50.1068 |

Totals : 5918.69092 383.11957

=====  
 \*\*\* End of Report \*\*\*

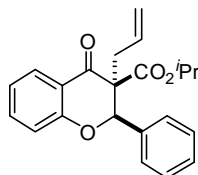

(+/-)-8c

Data File C:\DOCUMENTS AND SETTINGS\ADMINISTRATOR\DESKTOP\HZ1\SIG1002832.D  
 Sample Name: HZ-5-71A

=====  
 Acq. Operator :  
 Acq. Instrument : 仪器 1 Location : Vial 1  
 Injection Date : 3/31/2019 5:02:35 PM Inj Volume : 5.000 µl  
 Acq. Method : C:\CHEM32\1\METHODS\DEF\_LC11.M  
 Last changed : 3/31/2019 4:54:16 PM  
 (modified after loading)  
 Analysis Method : C:\CHEM32\1\METHODS\DEF\_LC11.M  
 Last changed : 7/12/2019 8:17:44 AM  
 (modified after loading)  
 Sample Info : AD-H, n-hexane/i-PrOH = 99/1, 0.7 mL/min, 30 oC, 254 nm

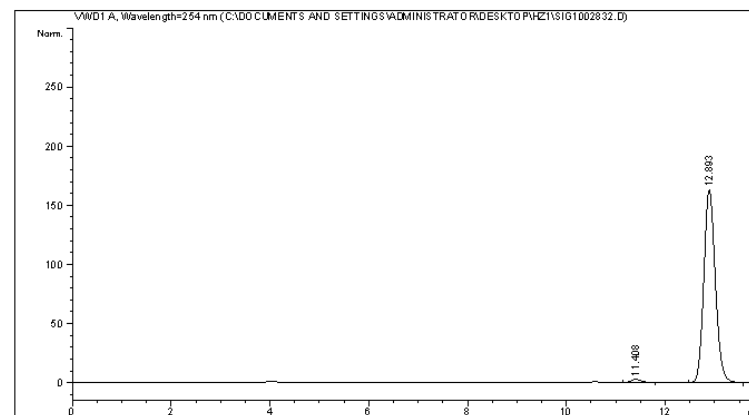

=====  
 Area Percent Report  
 =====

Sorted By : Signal  
 Multiplier: : 1.0000  
 Dilution: : 1.0000  
 Use Multiplier & Dilution Factor with ISTDs

Signal 1: VWD1 A, Wavelength=254 nm

| Peak # | RetTime [min] | Type | Width [min] | Area [mAU*s] | Height [mAU] | Area %  |
|--------|---------------|------|-------------|--------------|--------------|---------|
| 1      | 11.408        | BB   | 0.2246      | 39.59365     | 2.72323      | 1.4833  |
| 2      | 12.893        | BB   | 0.2492      | 2629.76392   | 162.99953    | 98.5167 |

Totals : 2669.35757 165.72275

=====  
 \*\*\* End of Report \*\*\*

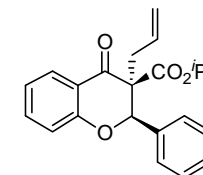

(-)-8c

Data File C:\CHEM32\1\DATA\ZHOU-19\YZN012239.D  
 Sample Name: HZ-5-70B+

=====  
 Acq. Operator :  
 Acq. Instrument : Instrument 1 Location : -  
 Injection Date : 3/30/2019 10:12:45 PM  
 Acq. Method : C:\CHEM32\1\METHODS\DEF\_LC11.M  
 Last changed : 3/30/2019 10:11:26 PM  
 (modified after loading)  
 Analysis Method : C:\CHEM32\1\METHODS\DEF\_LC11.M  
 Last changed : 7/12/2019 8:24:28 AM  
 (modified after loading)  
 Sample Info : IC, Hexane/i-PrOH = 99/1, 1.0 mL/min, 30 oC, 254 nm

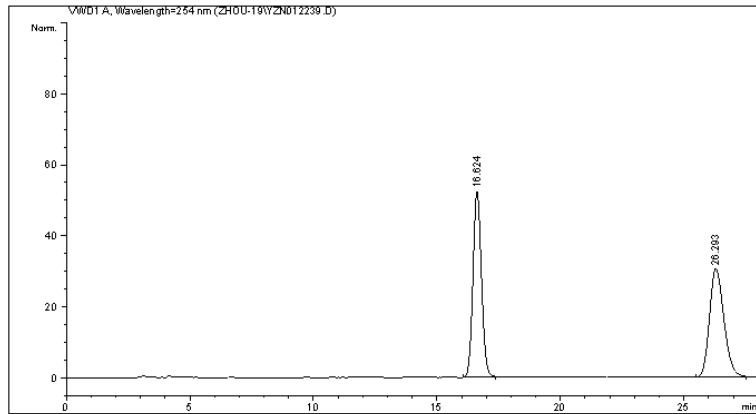

=====  
 Area Percent Report  
 =====

Sorted By : Signal  
 Multiplier: : 1.0000  
 Dilution: : 1.0000  
 Use Multiplier & Dilution Factor with ISTDs

Signal 1: VWD1 A, Wavelength=254 nm

| Peak # | RetTime [min] | Type | Width [min] | Area mAU   | Height %s | Area %  |
|--------|---------------|------|-------------|------------|-----------|---------|
| 1      | 16.624        | BB   | 0.3715      | 1251.18738 | 52.45699  | 50.2891 |
| 2      | 26.293        | BB   | 0.6236      | 1236.80322 | 30.56243  | 49.7109 |

Totals : 2487.99060 83.01942

=====  
 \*\*\* End of Report \*\*\*

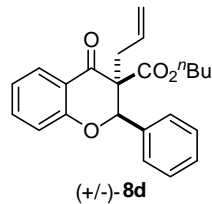

Data File C:\CHEM32\1\DATA\ZHOU-19\YZN012241.D  
 Sample Name: HZ-5-72B

=====  
 Acq. Operator :  
 Acq. Instrument : Instrument 1 Location : -  
 Injection Date : 3/30/2019 10:45:45 PM  
 Acq. Method : C:\CHEM32\1\METHODS\DEF\_LC11.M  
 Last changed : 3/30/2019 10:43:55 PM  
 (modified after loading)  
 Analysis Method : C:\CHEM32\1\METHODS\DEF\_LC11.M  
 Last changed : 7/12/2019 8:25:50 AM  
 (modified after loading)  
 Sample Info : IC, Hexane/i-PrOH = 99/1, 1.0 mL/min, 30 oC, 254 nm

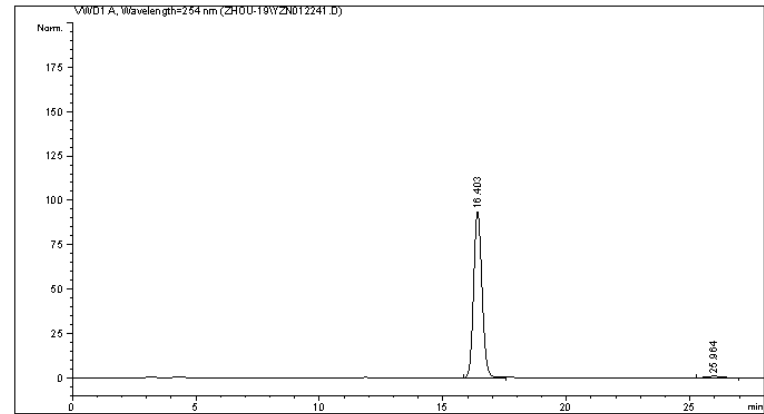

=====  
 Area Percent Report  
 =====

Sorted By : Signal  
 Multiplier: : 1.0000  
 Dilution: : 1.0000  
 Use Multiplier & Dilution Factor with ISTDs

Signal 1: VWD1 A, Wavelength=254 nm

| Peak # | RetTime [min] | Type | Width [min] | Area mAU   | Height %s  | Area %  |
|--------|---------------|------|-------------|------------|------------|---------|
| 1      | 16.403        | BB   | 0.3657      | 2212.51123 | 93.71712   | 98.5297 |
| 2      | 25.964        | BB   | 0.6083      | 33.01616   | 8.43179e-1 | 1.4703  |

Totals : 2245.52739 94.56030

=====  
 \*\*\* End of Report \*\*\*

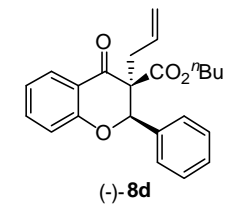

Data File C:\DOCUMENTS AND SETTINGS\ADMINISTRATOR\DESKTOP\HZ1\SIG1002825.D  
 Sample Name: HZ-5-70C+

=====  
 Acq. Operator :  
 Acq. Instrument : 仪器 1 Location : Vial 1  
 Injection Date : 3/30/2019 11:48:38 PM Inj Volume : 5.000 µl  
 Acq. Method : C:\CHEM32\1\METHODS\DEF\_LC11.M  
 Last changed : 3/30/2019 11:45:33 PM  
 (modified after loading)  
 Analysis Method : C:\CHEM32\1\METHODS\DEF\_LC11.M  
 Last changed : 7/12/2019 8:22:59 AM  
 (modified after loading)  
 Sample Info : AD-H, n-hexane/i-PrOH = 99/1, 0.5 mL/min, 30 oC, 254 nm

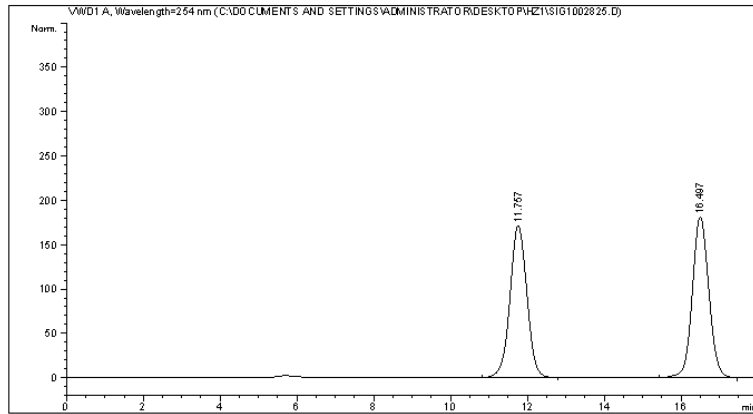

=====  
 Area Percent Report  
 =====

Sorted By : Signal  
 Multiplier: : 1.0000  
 Dilution: : 1.0000  
 Use Multiplier & Dilution Factor with ISTDs

Signal 1: VWD1 A, Wavelength=254 nm

| Peak # | RetTime [min] | Type | Width [min] | Area [mAU*s] | Height [mAU] | Area %  |
|--------|---------------|------|-------------|--------------|--------------|---------|
| 1      | 11.757        | BE   | 0.4803      | 5243.48047   | 171.19159    | 49.3074 |
| 2      | 16.497        | BE   | 0.4632      | 5390.77832   | 181.16483    | 50.6926 |

Totals : 1.06343e4 352.35641

=====  
 \*\*\* End of Report \*\*\*

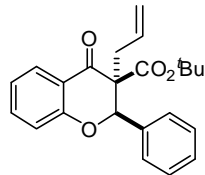

(+/-)-8e

Data File C:\DOCUMENTS AND SETTINGS\ADMINISTRATOR\DESKTOP\HZ1\SIG1002828.D  
 Sample Name: HZ-5-72C

=====  
 Acq. Operator :  
 Acq. Instrument : 仪器 1 Location : Vial 1  
 Injection Date : 3/31/2019 12:59:34 AM Inj Volume : 5.000 µl  
 Acq. Method : C:\CHEM32\1\METHODS\DEF\_LC11.M  
 Last changed : 3/31/2019 12:55:35 AM  
 (modified after loading)  
 Analysis Method : C:\CHEM32\1\METHODS\DEF\_LC11.M  
 Last changed : 7/12/2019 8:20:38 AM  
 (modified after loading)  
 Sample Info : AD-H, n-hexane/i-PrOH = 99/1, 0.5 mL/min, 30 oC, 254 nm

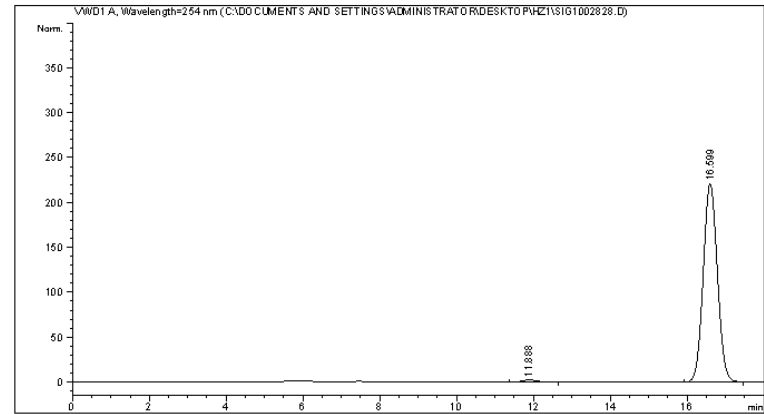

=====  
 Area Percent Report  
 =====

Sorted By : Signal  
 Multiplier: : 1.0000  
 Dilution: : 1.0000  
 Use Multiplier & Dilution Factor with ISTDs

Signal 1: VWD1 A, Wavelength=254 nm

| Peak # | RetTime [min] | Type | Width [min] | Area [mAU*s] | Height [mAU] | Area %  |
|--------|---------------|------|-------------|--------------|--------------|---------|
| 1      | 11.888        | WB   | 0.4139      | 57.64151     | 2.24970      | 1.0132  |
| 2      | 16.599        | BB   | 0.3997      | 5631.38818   | 220.68689    | 98.9868 |

Totals : 5689.02970 222.93659

=====  
 \*\*\* End of Report \*\*\*

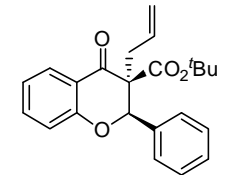

(-)-8e

Data File C:\CHEM32\1\DATA\ZHOU-19\YZN012119.D  
 Sample Name: HZ-5-61A+

=====  
 Acq. Operator :  
 Acq. Instrument : Instrument 1 Location : -  
 Injection Date : 3/23/2019 9:22:54 AM  
 Acq. Method : C:\CHEM32\1\METHODS\DEF\_LC11.M  
 Last changed : 3/23/2019 9:19:22 AM  
 (modified after loading)  
 Analysis Method : C:\CHEM32\1\METHODS\DEF\_LC11.M  
 Last changed : 7/12/2019 8:06:11 AM  
 (modified after loading)  
 Sample Info : AD-H, Hexane/i-PrOH = 97/3, 0.7 mL/min, 30 oC, 254 nm

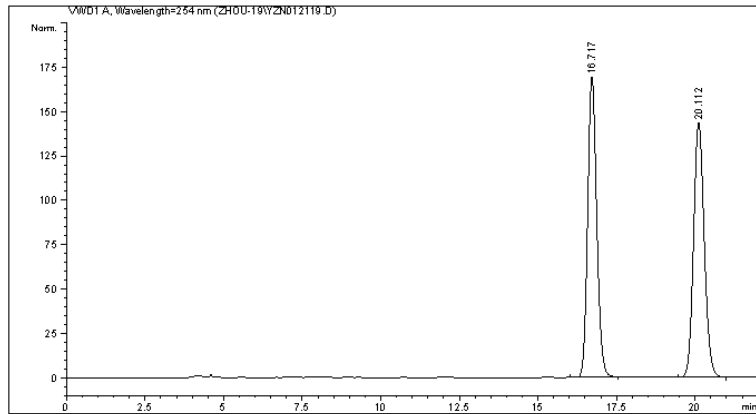

=====  
 Area Percent Report  
 =====

Sorted By : Signal  
 Multiplier: : 1.0000  
 Dilution: : 1.0000  
 Use Multiplier & Dilution Factor with ISTDs

Signal 1: VWD1 A, Wavelength=254 nm

| Peak # | RetTime [min] | Type | Width [min] | Area [mAU *s] | Height [mAU] | Area %  |
|--------|---------------|------|-------------|---------------|--------------|---------|
| 1      | 16.717        | BB   | 0.3070      | 3379.20703    | 169.42137    | 49.9382 |
| 2      | 20.112        | BB   | 0.3655      | 3387.56885    | 143.57513    | 50.0618 |

Totals : 6766.77588 312.99651

=====  
 \*\*\* End of Report \*\*\*

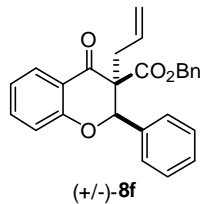

Data File C:\CHEM32\1\DATA\ZHOU-19\YZN012118.D  
 Sample Name: HZ-5-64A

=====  
 Acq. Operator :  
 Acq. Instrument : Instrument 1 Location : -  
 Injection Date : 3/23/2019 8:50:18 AM  
 Acq. Method : C:\CHEM32\1\METHODS\DEF\_LC11.M  
 Last changed : 3/23/2019 8:47:30 AM  
 (modified after loading)  
 Analysis Method : C:\CHEM32\1\METHODS\DEF\_LC11.M  
 Last changed : 7/12/2019 8:06:46 AM  
 (modified after loading)  
 Sample Info : AD-H, Hexane/i-PrOH = 97/3, 0.7 mL/min, 30 oC, 254 nm

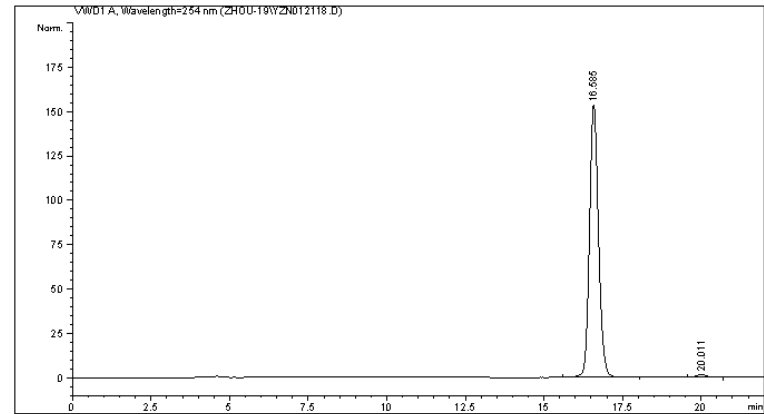

=====  
 Area Percent Report  
 =====

Sorted By : Signal  
 Multiplier: : 1.0000  
 Dilution: : 1.0000  
 Use Multiplier & Dilution Factor with ISTDs

Signal 1: VWD1 A, Wavelength=254 nm

| Peak # | RetTime [min] | Type | Width [min] | Area [mAU *s] | Height [mAU] | Area %  |
|--------|---------------|------|-------------|---------------|--------------|---------|
| 1      | 16.585        | BB   | 0.3089      | 3069.94922    | 153.56570    | 98.9530 |
| 2      | 20.011        | BB   | 0.3609      | 32.48267      | 1.41576      | 1.0470  |

Totals : 3102.43189 154.98147

=====  
 \*\*\* End of Report \*\*\*

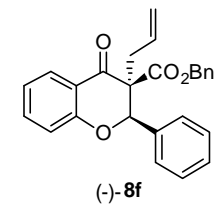

Data File C:\CHEM32\1\DATA\ZHOU-19\YZN012112.D  
 Sample Name: HZ-5-62B+

=====  
 Acq. Operator :  
 Acq. Instrument : Instrument 1 Location : -  
 Injection Date : 3/22/2019 9:04:57 PM  
 Acq. Method : C:\CHEM32\1\METHODS\DEF\_LC11.M  
 Last changed : 3/22/2019 8:52:36 PM  
 (modified after loading)  
 Analysis Method : C:\CHEM32\1\METHODS\DEF\_LC11.M  
 Last changed : 7/12/2019 8:08:17 AM  
 (modified after loading)  
 Sample Info : AD-H, Hexane/i-PrOH = 99/1, 0.5 mL/min, 30 oC, 254 nm

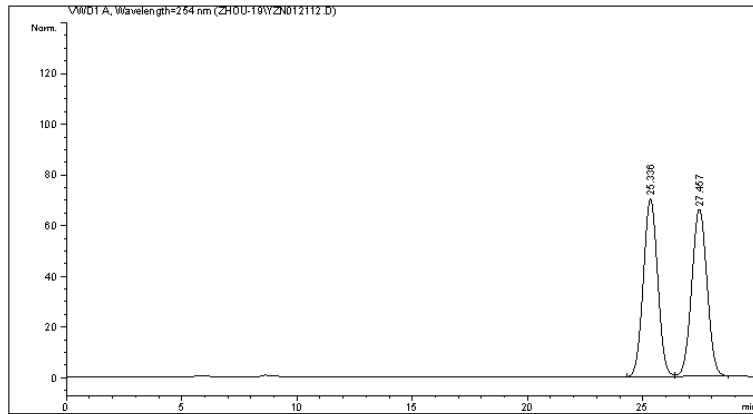

=====  
 Area Percent Report  
 =====

Sorted By : Signal  
 Multiplier: : 1.0000  
 Dilution: : 1.0000  
 Use Multiplier & Dilution Factor with ISTDs

Signal 1: VWD1 A, Wavelength=254 nm

| Peak # | RetTime [min] | Type | Width [min] | Area [mAU] | Area %  | Height [mAU] | Area %  |
|--------|---------------|------|-------------|------------|---------|--------------|---------|
| 1      | 25.336        | VB   | 0.6766      | 3036.05371 | 49.9876 | 70.16979     | 49.9876 |
| 2      | 27.457        | VB   | 0.7275      | 3037.56519 | 50.0124 | 65.84913     | 50.0124 |

Totals : 6073.61890 136.01892

=====  
 \*\*\* End of Report \*\*\*

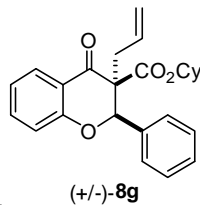

Data File C:\CHEM32\1\DATA\ZHOU-19\YZN012114.D  
 Sample Name: HZ-5-65B

=====  
 Acq. Operator :  
 Acq. Instrument : Instrument 1 Location : -  
 Injection Date : 3/22/2019 10:31:24 PM  
 Acq. Method : C:\CHEM32\1\METHODS\DEF\_LC11.M  
 Last changed : 3/22/2019 10:21:17 PM  
 (modified after loading)  
 Analysis Method : C:\CHEM32\1\METHODS\DEF\_LC11.M  
 Last changed : 7/12/2019 8:08:55 AM  
 (modified after loading)  
 Sample Info : AD-H, Hexane/i-PrOH = 99/1, 0.5 mL/min, 30 oC, 254 nm

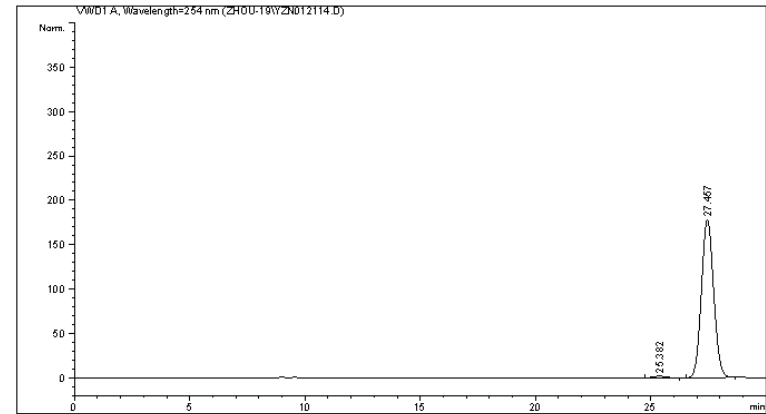

=====  
 Area Percent Report  
 =====

Sorted By : Signal  
 Multiplier: : 1.0000  
 Dilution: : 1.0000  
 Use Multiplier & Dilution Factor with ISTDs

Signal 1: VWD1 A, Wavelength=254 nm

| Peak # | RetTime [min] | Type | Width [min] | Area [mAU] | Area %  | Height [mAU] | Area %  |
|--------|---------------|------|-------------|------------|---------|--------------|---------|
| 1      | 25.382        | BB   | 0.4805      | 64.36123   | 0.9707  | 1.89603      | 0.9707  |
| 2      | 27.457        | BB   | 0.5753      | 6565.90039 | 99.0293 | 177.68295    | 99.0293 |

Totals : 6630.26162 179.57899

=====  
 \*\*\* End of Report \*\*\*

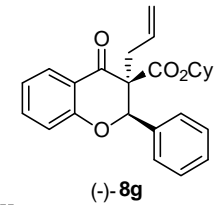

Data File C:\CHEM32\1\DATA\ZHOU-19\YZN012407.D  
 Sample Name: HZ-5-81A(+)

=====  
 Acq. Operator :  
 Acq. Instrument : Instrument 1 Location : -  
 Injection Date : 4/17/2019 8:04:40 PM  
 Acq. Method : C:\CHEM32\1\METHODS\DEF\_LC11.M  
 Last changed : 4/17/2019 8:02:48 PM  
 (modified after loading)  
 Analysis Method : C:\CHEM32\1\METHODS\DEF\_LC11.M  
 Last changed : 7/12/2019 8:54:08 AM  
 (modified after loading)  
 Sample Info : IC, Hexane/i-PrOH =99/1, 1.0 mL/min, 30 oC, 254 nm

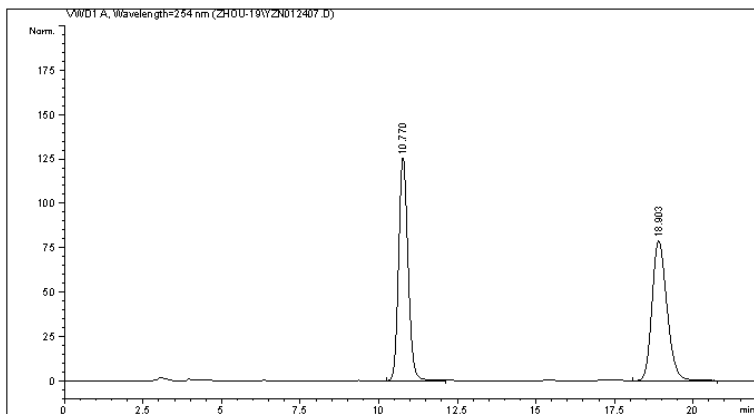

=====  
 Area Percent Report  
 =====

Sorted By : Signal  
 Multiplier: : 1.0000  
 Dilution: : 1.0000  
 Use Multiplier & Dilution Factor with ISTDs

Signal 1: VWD1 A, Wavelength=254 nm

| Peak # | RetTime [min] | Type | Width [min] | Area mAU   | Height %s | Area [mAU] | Area % |
|--------|---------------|------|-------------|------------|-----------|------------|--------|
| 1      | 10.770        | BB   | 0.3241      | 2615.15234 | 125.80367 | 50.0999    |        |
| 2      | 18.903        | VB   | 0.5103      | 2604.72168 | 78.91474  | 49.9001    |        |

Totals : 5219.87402 204.71841

=====  
 \*\*\* End of Report \*\*\*

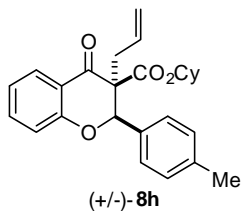

Data File C:\CHEM32\1\DATA\ZHOU-19\YZN012410.D  
 Sample Name: HZ-5-83A

=====  
 Acq. Operator :  
 Acq. Instrument : Instrument 1 Location : -  
 Injection Date : 4/17/2019 9:34:48 PM  
 Acq. Method : C:\CHEM32\1\METHODS\DEF\_LC11.M  
 Last changed : 4/17/2019 9:32:55 PM  
 (modified after loading)  
 Analysis Method : C:\CHEM32\1\METHODS\DEF\_LC11.M  
 Last changed : 7/12/2019 8:52:49 AM  
 (modified after loading)  
 Sample Info : IC, Hexane/i-PrOH =99/1, 1.0 mL/min, 30 oC, 254 nm

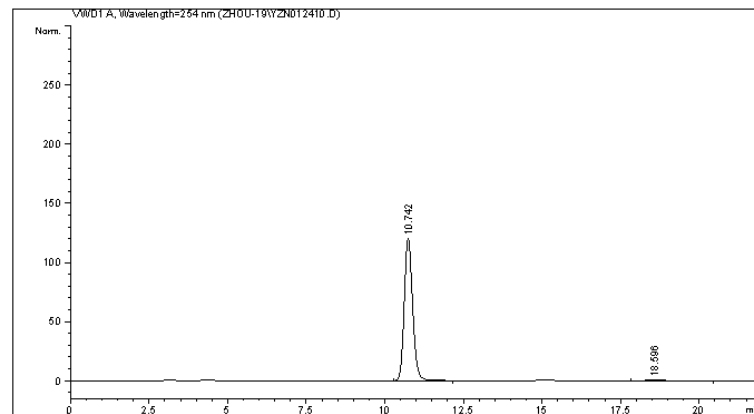

=====  
 Area Percent Report  
 =====

Sorted By : Signal  
 Multiplier: : 1.0000  
 Dilution: : 1.0000  
 Use Multiplier & Dilution Factor with ISTDs

Signal 1: VWD1 A, Wavelength=254 nm

| Peak # | RetTime [min] | Type | Width [min] | Area mAU   | Height %s  | Area [mAU] | Area % |
|--------|---------------|------|-------------|------------|------------|------------|--------|
| 1      | 10.742        | BB   | 0.2862      | 2232.10352 | 120.37609  | 98.6494    |        |
| 2      | 18.596        | VB   | 0.4881      | 30.55843   | 9.44536e-1 | 1.3506     |        |

Totals : 2262.66195 121.32063

=====  
 \*\*\* End of Report \*\*\*

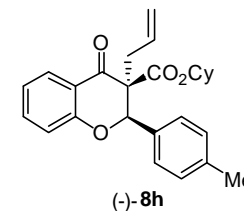

Data File C:\CHEM32\1\DATA\ZHOU-19\YZN012412.D  
 Sample Name: HZ-5-82B+

=====  
 Acq. Operator :  
 Acq. Instrument : Instrument 1 Location : -  
 Injection Date : 4/17/2019 10:23:51 PM  
 Acq. Method : C:\CHEM32\1\METHODS\DEF\_LC11.M  
 Last changed : 4/17/2019 10:22:35 PM  
 (modified after loading)  
 Analysis Method : C:\CHEM32\1\METHODS\DEF\_LC11.M  
 Last changed : 7/12/2019 8:56:21 AM  
 (modified after loading)  
 Sample Info : IC, Hexane/i-PrOH =99/1, 1.0 mL/min, 30 oC, 254 nm

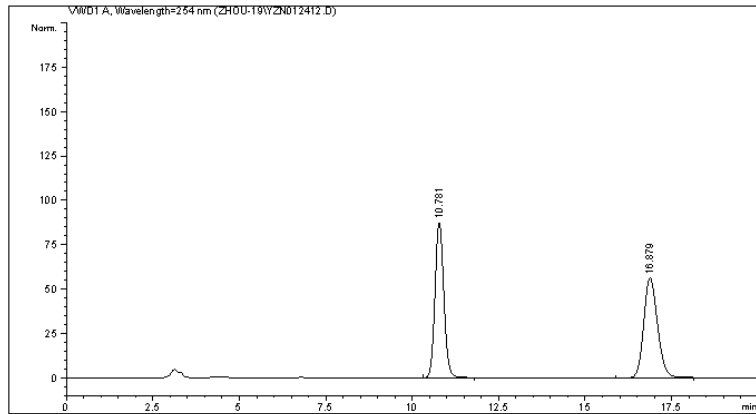

=====  
 Area Percent Report  
 =====

Sorted By : Signal  
 Multiplier: : 1.0000  
 Dilution: : 1.0000  
 Use Multiplier & Dilution Factor with ISTDs

Signal 1: VWD1 A, Wavelength=254 nm

| Peak # | RetTime [min] | Type | Width [min] | Area mAU   | Area %  | Height [mAU] | Area %  |
|--------|---------------|------|-------------|------------|---------|--------------|---------|
| 1      | 10.781        | BB   | 0.2769      | 1555.35498 | 49.9401 | 87.66850     | 50.0599 |
| 2      | 16.879        | VB   | 0.4245      | 1559.08545 | 50.0599 | 56.39009     | 50.0599 |

Totals : 3114.44043 144.05859

=====  
 \*\*\* End of Report \*\*\*

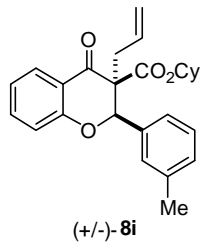

Data File C:\CHEM32\1\DATA\ZHOU-19\YZN012419.D  
 Sample Name: HZ-5-84B

=====  
 Acq. Operator :  
 Acq. Instrument : Instrument 1 Location : -  
 Injection Date : 4/18/2019 9:29:10 AM  
 Acq. Method : C:\CHEM32\1\METHODS\DEF\_LC11.M  
 Last changed : 4/18/2019 9:24:48 AM  
 (modified after loading)  
 Analysis Method : C:\CHEM32\1\METHODS\DEF\_LC11.M  
 Last changed : 7/12/2019 8:55:29 AM  
 (modified after loading)  
 Sample Info : IC, Hexane/i-PrOH =99/1, 1.0 mL/min, 30 oC, 254 nm

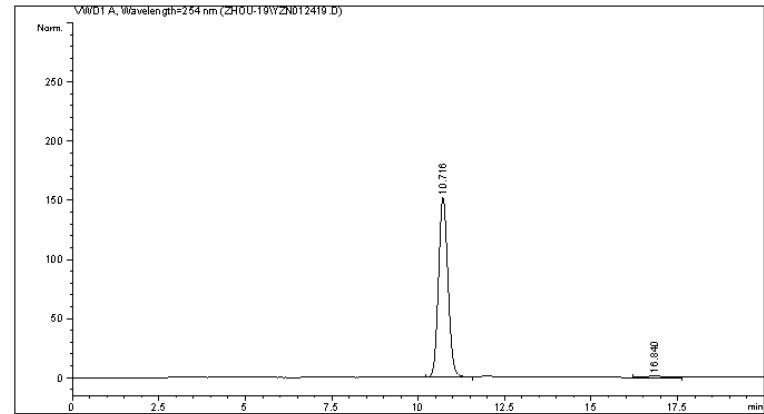

=====  
 Area Percent Report  
 =====

Sorted By : Signal  
 Multiplier: : 1.0000  
 Dilution: : 1.0000  
 Use Multiplier & Dilution Factor with ISTDs

Signal 1: VWD1 A, Wavelength=254 nm

| Peak # | RetTime [min] | Type | Width [min] | Area mAU   | Area %  | Height [mAU] | Area %  |
|--------|---------------|------|-------------|------------|---------|--------------|---------|
| 1      | 10.716        | BV   | 0.2961      | 2909.43652 | 98.6682 | 152.01653    | 98.6682 |
| 2      | 16.840        | BB   | 0.4592      | 39.27236   | 1.3318  | 1.30353      | 1.3318  |

Totals : 2948.70888 153.32005

=====  
 \*\*\* End of Report \*\*\*

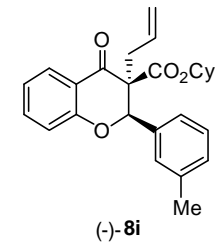

Data File C:\CHEM32\1\DATA\ZHOU-19\YZN012488.D  
 Sample Name: HZ-5-89A+

=====  
 Acq. Operator :  
 Acq. Instrument : Instrument 1 Location : -  
 Injection Date : 4/25/2019 8:16:12 PM  
 Acq. Method : C:\CHEM32\1\METHODS\DEF\_LC11.M  
 Last changed : 4/25/2019 8:14:51 PM  
 (modified after loading)  
 Analysis Method : C:\CHEM32\1\METHODS\DEF\_LC11.M  
 Last changed : 7/12/2019 9:00:52 AM  
 (modified after loading)  
 Sample Info : IC, Hexane/i-PrOH = 99/1, 1.0 mL/min, 30 oC, 254 nm

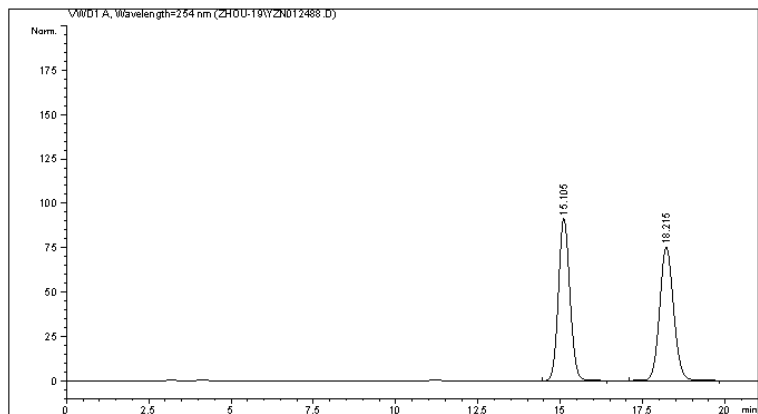

=====  
 Area Percent Report  
 =====

Sorted By : Signal  
 Multiplier: : 1.0000  
 Dilution: : 1.0000  
 Use Multiplier & Dilution Factor with ISTDs

Signal 1: VWD1 A, Wavelength=254 nm

| Peak # | RetTime [min] | Type | Width [min] | Area [mAU] | Height [mAU] | Area %  |
|--------|---------------|------|-------------|------------|--------------|---------|
| 1      | 15.105        | BB   | 0.3758      | 2213.73779 | 91.38393     | 49.9088 |
| 2      | 18.215        | BB   | 0.4586      | 2221.82739 | 75.13814     | 50.0912 |

Totals : 4435.56519 166.52206

=====  
 \*\*\* End of Report \*\*\*

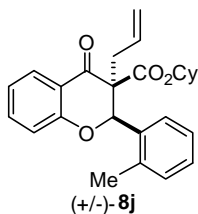

Data File C:\CHEM32\1\DATA\ZHOU-19\YZN012489.D  
 Sample Name: HZ-5-92A

=====  
 Acq. Operator :  
 Acq. Instrument : Instrument 1 Location : -  
 Injection Date : 4/25/2019 8:38:35 PM  
 Acq. Method : C:\CHEM32\1\METHODS\DEF\_LC11.M  
 Last changed : 4/25/2019 8:38:00 PM  
 (modified after loading)  
 Analysis Method : C:\CHEM32\1\METHODS\DEF\_LC11.M  
 Last changed : 7/12/2019 9:03:58 AM  
 (modified after loading)  
 Sample Info : IC, Hexane/i-PrOH = 99/1, 1.0 mL/min, 30 oC, 254 nm

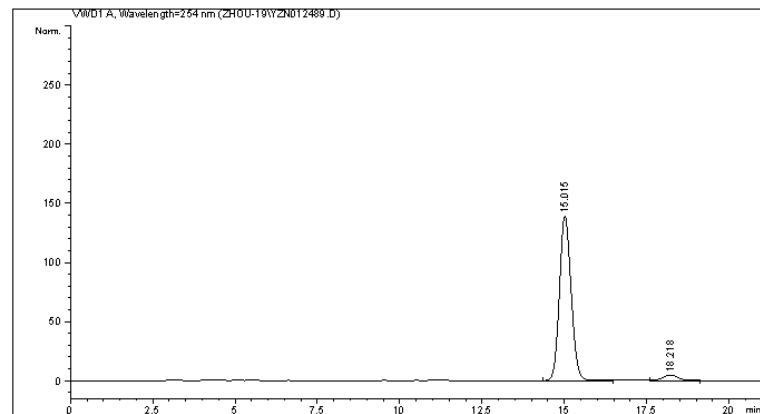

=====  
 Area Percent Report  
 =====

Sorted By : Signal  
 Multiplier: : 1.0000  
 Dilution: : 1.0000  
 Use Multiplier & Dilution Factor with ISTDs

Signal 1: VWD1 A, Wavelength=254 nm

| Peak # | RetTime [min] | Type | Width [min] | Area [mAU] | Height [mAU] | Area %  |
|--------|---------------|------|-------------|------------|--------------|---------|
| 1      | 15.015        | BB   | 0.3837      | 3426.23169 | 138.96808    | 95.9993 |
| 2      | 18.218        | BB   | 0.4740      | 142.78436  | 4.69715      | 4.0007  |

Totals : 3569.01605 143.66523

=====  
 \*\*\* End of Report \*\*\*

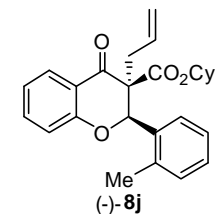



Data File C:\CHEM32\1\DATA\ZHOU-19\YZN012414.D  
 Sample Name: HZ-5-82C+

=====  
 Acq. Operator :  
 Acq. Instrument : Instrument 1 Location : -  
 Injection Date : 4/17/2019 11:15:59 PM  
 Acq. Method : C:\CHEM32\1\METHODS\DEF\_LC11.M  
 Last changed : 4/17/2019 11:14:27 PM  
 (modified after loading)  
 Analysis Method : C:\CHEM32\1\METHODS\DEF\_LC11.M  
 Last changed : 7/12/2019 8:57:17 AM  
 (modified after loading)  
 Sample Info : IC, Hexane/i-PrOH =99/1, 1.0 mL/min, 30 oC, 254 nm

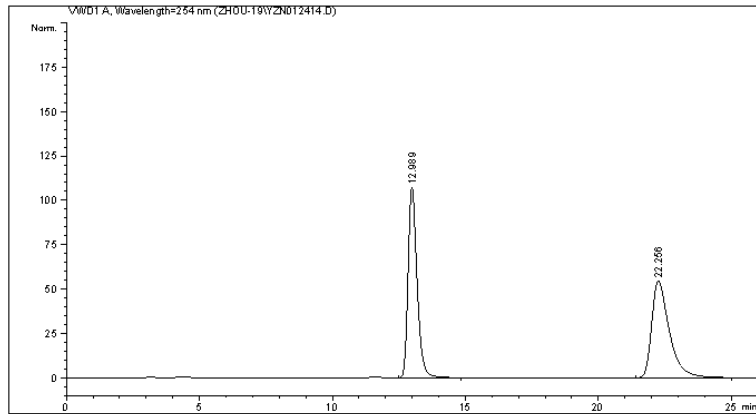

=====  
 Area Percent Report  
 =====

Sorted By : Signal  
 Multiplier: : 1.0000  
 Dilution: : 1.0000  
 Use Multiplier & Dilution Factor with ISTDs

Signal 1: VWD1 A, Wavelength=254 nm

| Peak # | RetTime [min] | Type | Width [min] | Area [mAU] | Height [mAU] | Area %  |
|--------|---------------|------|-------------|------------|--------------|---------|
| 1      | 12.989        | BB   | 0.3582      | 2522.35864 | 107.48181    | 50.0378 |
| 2      | 22.256        | BB   | 0.6859      | 2518.54785 | 54.68048     | 49.9622 |

Totals : 5040.90649 162.16229

=====  
 \*\*\* End of Report \*\*\*

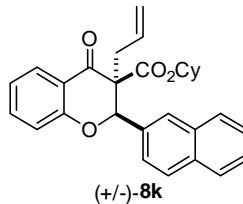

Data File C:\CHEM32\1\DATA\ZHOU-19\YZN012416.D  
 Sample Name: HZ-5-84C

=====  
 Acq. Operator :  
 Acq. Instrument : Instrument 1 Location : -  
 Injection Date : 4/18/2019 12:16:08 AM  
 Acq. Method : C:\CHEM32\1\METHODS\DEF\_LC11.M  
 Last changed : 4/18/2019 12:13:07 AM  
 (modified after loading)  
 Analysis Method : C:\CHEM32\1\METHODS\DEF\_LC11.M  
 Last changed : 7/12/2019 8:59:42 AM  
 (modified after loading)  
 Sample Info : IC, Hexane/i-PrOH =99/1, 1.0 mL/min, 30 oC, 254 nm

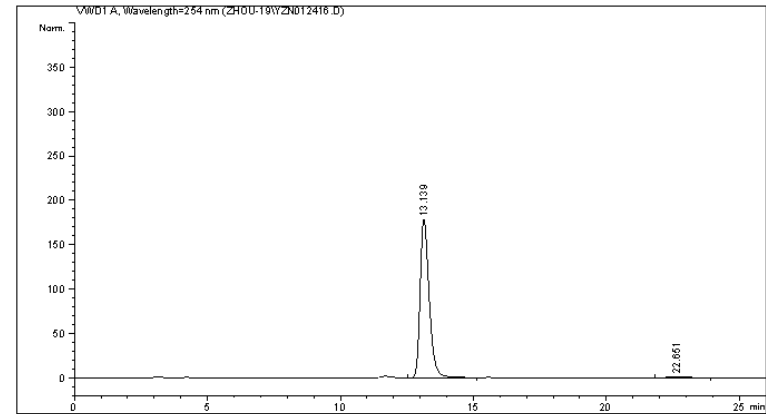

=====  
 Area Percent Report  
 =====

Sorted By : Signal  
 Multiplier: : 1.0000  
 Dilution: : 1.0000  
 Use Multiplier & Dilution Factor with ISTDs

Signal 1: VWD1 A, Wavelength=254 nm

| Peak # | RetTime [min] | Type | Width [min] | Area [mAU] | Height [mAU] | Area %  |
|--------|---------------|------|-------------|------------|--------------|---------|
| 1      | 13.139        | BB   | 0.3636      | 4226.47412 | 178.52505    | 98.7389 |
| 2      | 22.651        | BB   | 0.7410      | 53.98066   | 1.09522      | 1.2611  |

Totals : 4280.45478 179.62027

=====  
 \*\*\* End of Report \*\*\*

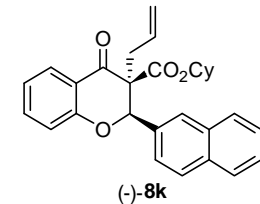

Data File D:\USERS\CHEMSTATION\1\DATA\HZ\YZ3000117.D  
 Sample Name: HZ-5-97A+

=====  
 Acq. Operator : SYSTEM  
 Sample Operator : SYSTEM  
 Acq. Instrument : 1260II Location : 1  
 Injection Date : 4/30/2019 4:49:24 PM Inj : 1  
 Inj Volume : No inj  
 Acq. Method : C:\Users\Public\Documents\ChemStation\1\Methods\def\_LC.M  
 Last changed : 4/30/2019 3:21:41 PM by SYSTEM  
 (modified after loading)  
 Analysis Method : C:\Users\Public\Documents\ChemStation\1\Methods\def\_LC.M  
 Last changed : 7/11/2019 11:58:30 PM by SYSTEM  
 (modified after loading)  
 Sample Info : IC, n-Hexane/i-PrOH = 99/1, 1.0 mL/min, 30 oC, 254 nm

Additional Info : Peak(s) manually integrated

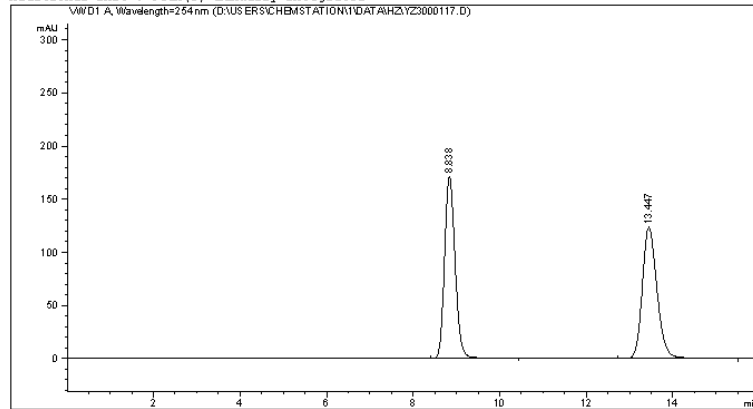

=====  
 Area Percent Report  
 =====

Sorted By : Signal  
 Multiplier : 1.0000  
 Dilution : 1.0000  
 Do not use Multiplier & Dilution Factor with ISTDs

Signal 1: VWD1 A, Wavelength=254 nm

| Peak # | RetTime [min] | Type | Width [min] | Area [mAU*s] | Height [mAU] | Area %  |
|--------|---------------|------|-------------|--------------|--------------|---------|
| 1      | 8.838         | VB   | 0.2632      | 2891.92334   | 171.12738    | 49.9343 |
| 2      | 13.447        | BB   | 0.3620      | 2899.53442   | 123.44003    | 50.0657 |

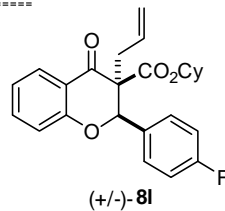

Data File D:\USERS\CHEMSTATION\1\DATA\HZ\YZ3000119.D  
 Sample Name: HZ-5-99A

=====  
 Acq. Operator : SYSTEM  
 Sample Operator : SYSTEM  
 Acq. Instrument : 1260II Location : 1  
 Injection Date : 4/30/2019 5:23:41 PM Inj : 1  
 Inj Volume : No inj  
 Acq. Method : C:\Users\Public\Documents\ChemStation\1\Methods\def\_LC.M  
 Last changed : 4/30/2019 3:21:41 PM by SYSTEM  
 (modified after loading)  
 Analysis Method : C:\Users\Public\Documents\ChemStation\1\Methods\def\_LC.M  
 Last changed : 7/11/2019 9:33:23 PM by SYSTEM  
 (modified after loading)  
 Sample Info : IC, n-Hexane/i-PrOH = 99/1, 1.0 mL/min, 30 oC, 254 nm

Additional Info : Peak(s) manually integrated

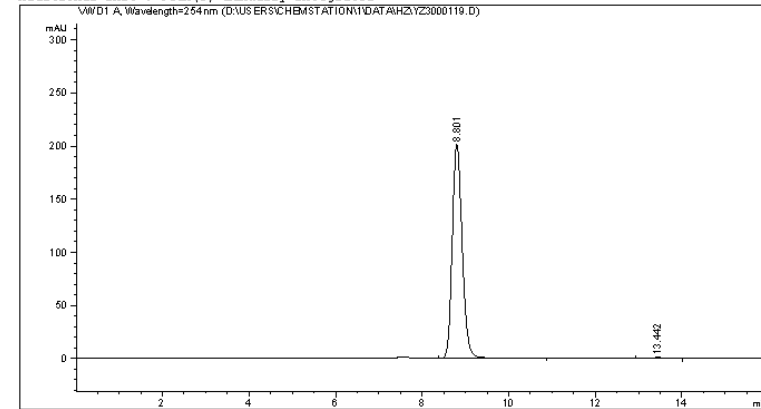

=====  
 Area Percent Report  
 =====

Sorted By : Signal  
 Multiplier : 1.0000  
 Dilution : 1.0000  
 Do not use Multiplier & Dilution Factor with ISTDs

Signal 1: VWD1 A, Wavelength=254 nm

| Peak # | RetTime [min] | Type | Width [min] | Area [mAU*s] | Height [mAU] | Area %  |
|--------|---------------|------|-------------|--------------|--------------|---------|
| 1      | 8.801         | VB   | 0.2485      | 3216.52051   | 201.22316    | 99.3524 |
| 2      | 13.442        | BB   | 0.3473      | 20.96466     | 9.43304e-1   | 0.6476  |

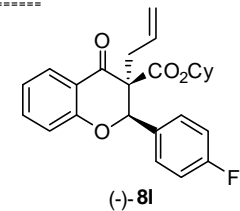

Data File C:\CHEM32\1\DATA\ZHOU-19\YZN012566.D  
 Sample Name: HZ-6-4+

=====  
 Acq. Operator :  
 Acq. Instrument : Instrument 1 Location : -  
 Injection Date : 5/8/2019 10:42:29 AM  
 Acq. Method : C:\CHEM32\1\METHODS\DEF\_LC11.M  
 Last changed : 5/8/2019 10:39:41 AM  
 (modified after loading)  
 Analysis Method : C:\CHEM32\1\METHODS\DEF\_LC11.M  
 Last changed : 7/12/2019 7:03:42 AM  
 (modified after loading)  
 Sample Info : IC, Hexane/i-PrOH = 99/1, 1.0 mL/min, 30 oC, 254nm

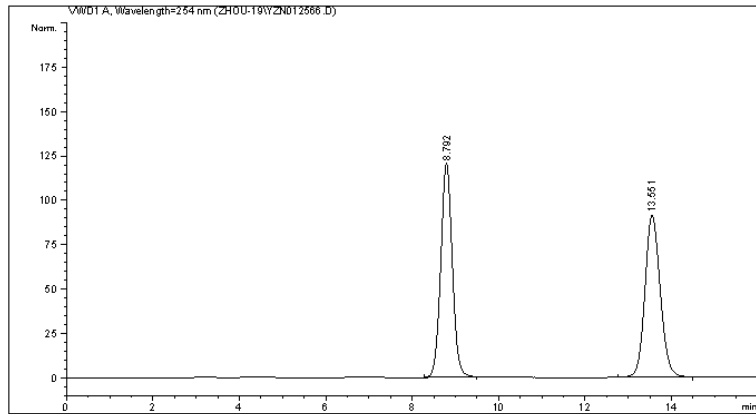

=====  
 Area Percent Report  
 =====

Sorted By : Signal  
 Multiplier: : 1.0000  
 Dilution: : 1.0000  
 Use Multiplier & Dilution Factor with ISTDs

Signal 1: VWD1 A, Wavelength=254 nm

| Peak # | RetTime [min] | Type | Width [min] | Area [mAU] | Height [%s] | Area [%] |
|--------|---------------|------|-------------|------------|-------------|----------|
| 1      | 8.792         | BB   | 0.2844      | 2228.45142 | 120.36389   | 49.7765  |
| 2      | 13.551        | BB   | 0.3786      | 2248.46362 | 91.43044    | 50.2235  |

Totals : 4476.91504 211.79433

=====  
 \*\*\* End of Report \*\*\*

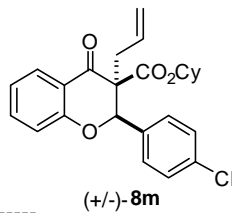

Data File C:\CHEM32\1\DATA\ZHOU-19\YZN012565.D  
 Sample Name: HZ-6-4

=====  
 Acq. Operator :  
 Acq. Instrument : Instrument 1 Location : -  
 Injection Date : 5/8/2019 10:16:03 AM  
 Acq. Method : C:\CHEM32\1\METHODS\DEF\_LC11.M  
 Last changed : 5/8/2019 10:13:10 AM  
 (modified after loading)  
 Analysis Method : C:\CHEM32\1\METHODS\DEF\_LC11.M  
 Last changed : 7/12/2019 7:10:16 AM  
 (modified after loading)  
 Sample Info : IC, Hexane/i-PrOH = 99/1, 1.0 mL/min, 30 oC, 254nm

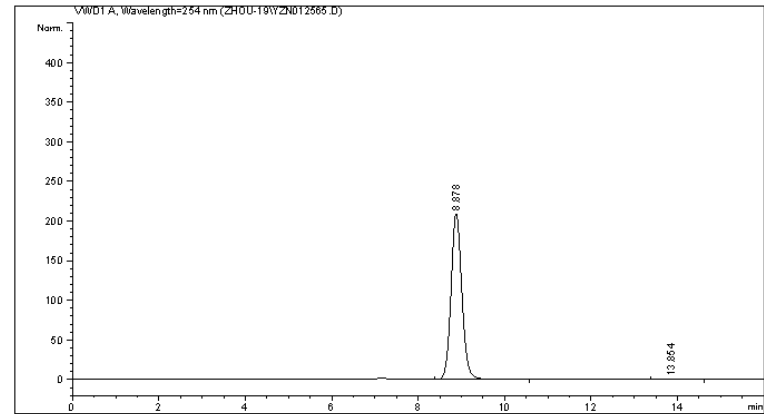

=====  
 Area Percent Report  
 =====

Sorted By : Signal  
 Multiplier: : 1.0000  
 Dilution: : 1.0000  
 Use Multiplier & Dilution Factor with ISTDs

Signal 1: VWD1 A, Wavelength=254 nm

| Peak # | RetTime [min] | Type | Width [min] | Area [mAU] | Height [%s] | Area [%] |
|--------|---------------|------|-------------|------------|-------------|----------|
| 1      | 8.878         | BB   | 0.2677      | 3654.65991 | 209.41612   | 99.1768  |
| 2      | 13.854        | BB   | 0.3642      | 30.33416   | 1.26511     | 0.8232   |

Totals : 3684.99407 210.68123

=====  
 \*\*\* End of Report \*\*\*

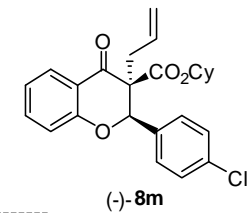

Data File D:\USERS\CHEMSTATION\1\DATA\HZ\YZ3000109.D  
 Sample Name: HZ-5-98E+

=====  
 Acq. Operator : SYSTEM  
 Sample Operator : SYSTEM  
 Acq. Instrument : 1260II Location : 1  
 Injection Date : 4/30/2019 10:42:04 AM Inj : 1  
 Inj Volume : No inj  
 Acq. Method : C:\Users\Public\Documents\ChemStation\1\Methods\def\_LC.M  
 Last changed : 4/30/2019 8:15:06 AM by SYSTEM  
 (modified after loading)  
 Analysis Method : C:\Users\Public\Documents\ChemStation\1\Methods\def\_LC.M  
 Last changed : 7/11/2019 11:57:00 PM by SYSTEM  
 (modified after loading)  
 Sample Info : IC, n-Hexane/i-PrOH = 99/1, 1.0 mL/min, 30 oC, 254 nm

Additional Info : Peak(s) manually integrated

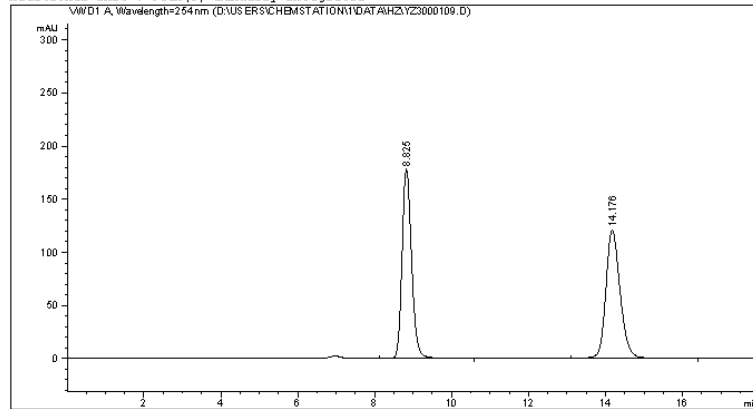

=====  
 Area Percent Report  
 =====

Sorted By : Signal  
 Multiplier : 1.0000  
 Dilution : 1.0000  
 Do not use Multiplier & Dilution Factor with ISTDs

Signal 1: VWD1 A, Wavelength=254 nm

| Peak # | RetTime [min] | Type | Width [min] | Area [mAU*s] | Height [mAU] | Area %  |
|--------|---------------|------|-------------|--------------|--------------|---------|
| 1      | 8.825         | BB   | 0.2649      | 3068.51440   | 178.19858    | 49.6171 |
| 2      | 14.176        | BB   | 0.3964      | 3115.87427   | 121.02505    | 50.3829 |

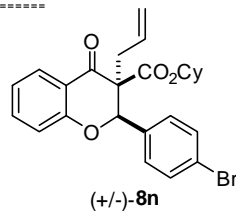

Data File D:\USERS\CHEMSTATION\1\DATA\HZ\YZ3000111.D  
 Sample Name: HZ-5-100E

=====  
 Acq. Operator : SYSTEM  
 Sample Operator : SYSTEM  
 Acq. Instrument : 1260II Location : 1  
 Injection Date : 4/30/2019 11:28:31 AM Inj : 1  
 Inj Volume : No inj  
 Acq. Method : C:\Users\Public\Documents\ChemStation\1\Methods\def\_LC.M  
 Last changed : 4/30/2019 8:15:06 AM by SYSTEM  
 (modified after loading)  
 Analysis Method : C:\Users\Public\Documents\ChemStation\1\Methods\def\_LC.M  
 Last changed : 7/11/2019 11:55:04 PM by SYSTEM  
 (modified after loading)  
 Sample Info : IC, n-Hexane/i-PrOH = 99/1, 1.0 mL/min, 30 oC, 254 nm

Additional Info : Peak(s) manually integrated

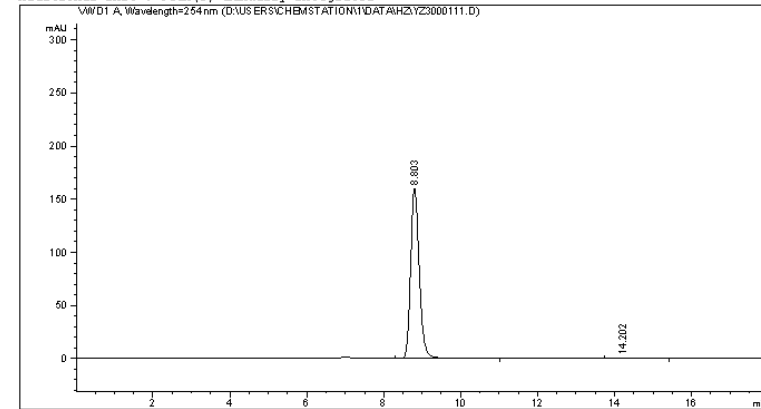

=====  
 Area Percent Report  
 =====

Sorted By : Signal  
 Multiplier : 1.0000  
 Dilution : 1.0000  
 Do not use Multiplier & Dilution Factor with ISTDs

Signal 1: VWD1 A, Wavelength=254 nm

| Peak # | RetTime [min] | Type | Width [min] | Area [mAU*s] | Height [mAU] | Area %  |
|--------|---------------|------|-------------|--------------|--------------|---------|
| 1      | 8.803         | BB   | 0.2409      | 2506.81030   | 159.88077    | 99.3593 |
| 2      | 14.202        | BB   | 0.3853      | 16.16588     | 6.56519e-1   | 0.6407  |

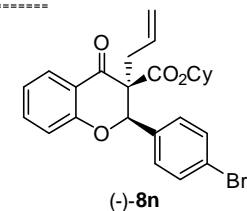

Data File C:\CHEM32\1\DATA\ZHOU-19\YZN012614.D  
 Sample Name: HZ-6-8A+-

=====  
 Acq. Operator :  
 Acq. Instrument : Instrument 1 Location : -  
 Injection Date : 5/14/2019 11:36:49 AM  
 Acq. Method : C:\CHEM32\1\METHODS\DEF\_LC11.M  
 Last changed : 5/14/2019 11:35:45 AM  
 (modified after loading)  
 Analysis Method : C:\CHEM32\1\METHODS\DEF\_LC11.M  
 Last changed : 7/12/2019 7:13:39 AM  
 (modified after loading)  
 Sample Info : IC, Hexane/i-PrOH = 99/1, 1.0 mL/min, 30 oC, 254 nm

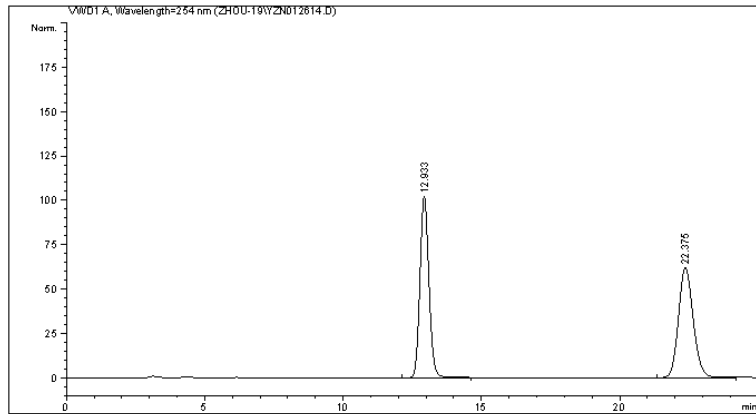

=====  
 Area Percent Report  
 =====

Sorted By : Signal  
 Multiplier: : 1.0000  
 Dilution: : 1.0000  
 Use Multiplier & Dilution Factor with ISTDs

Signal 1: VWD1 A, Wavelength=254 nm

| Peak # | RetTime [min] | Type | Width [min] | Area mAU   | Height *s [mAU] | Area %  |
|--------|---------------|------|-------------|------------|-----------------|---------|
| 1      | 12.933        | BB   | 0.3501      | 2299.66626 | 102.11424       | 50.0695 |
| 2      | 22.375        | BB   | 0.5737      | 2293.27881 | 62.07491        | 49.9305 |

Totals : 4592.94507 164.18915

=====  
 \*\*\* End of Report \*\*\*

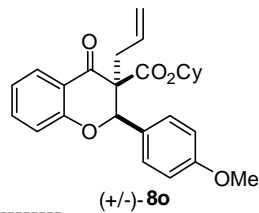

Data File C:\CHEM32\1\DATA\ZHOU-19\YZN012613.D  
 Sample Name: HZ-6-8A

=====  
 Acq. Operator :  
 Acq. Instrument : Instrument 1 Location : -  
 Injection Date : 5/14/2019 11:08:48 AM  
 Acq. Method : C:\CHEM32\1\METHODS\DEF\_LC11.M  
 Last changed : 5/14/2019 10:37:18 AM  
 (modified after loading)  
 Analysis Method : C:\CHEM32\1\METHODS\DEF\_LC11.M  
 Last changed : 7/12/2019 7:16:59 AM  
 (modified after loading)  
 Sample Info : IC, Hexane/i-PrOH = 99/1, 1.0 mL/min, 30 oC, 254 nm

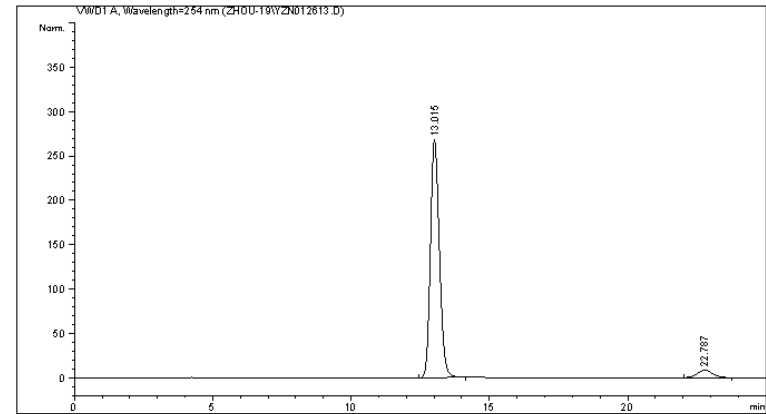

=====  
 Area Percent Report  
 =====

Sorted By : Signal  
 Multiplier: : 1.0000  
 Dilution: : 1.0000  
 Use Multiplier & Dilution Factor with ISTDs

Signal 1: VWD1 A, Wavelength=254 nm

| Peak # | RetTime [min] | Type | Width [min] | Area mAU   | Height *s [mAU] | Area %  |
|--------|---------------|------|-------------|------------|-----------------|---------|
| 1      | 13.015        | BB   | 0.3494      | 6026.62988 | 268.27670       | 94.8859 |
| 2      | 22.787        | BB   | 0.5884      | 324.81699  | 8.52953         | 5.1141  |

Totals : 6351.44687 276.80623

=====  
 \*\*\* End of Report \*\*\*

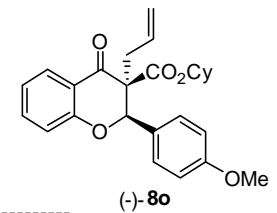

Data File C:\CHEM32\1\DATA\ZHOU-19\YZN012495.D  
 Sample Name: HZ-5-90B+

=====  
 Acq. Operator :  
 Acq. Instrument : Instrument 1 Location : -  
 Injection Date : 4/26/2019 10:07:28 AM  
 Acq. Method : C:\CHEM32\1\METHODS\DEF\_LC11.M  
 Last changed : 4/26/2019 10:04:30 AM  
 (modified after loading)  
 Analysis Method : C:\CHEM32\1\METHODS\DEF\_LC11.M  
 Last changed : 7/12/2019 9:01:30 AM  
 (modified after loading)  
 Sample Info : IC, Hexane/i-PrOH = 98/2, 0.8 mL/min, 30 oC, 254 nm

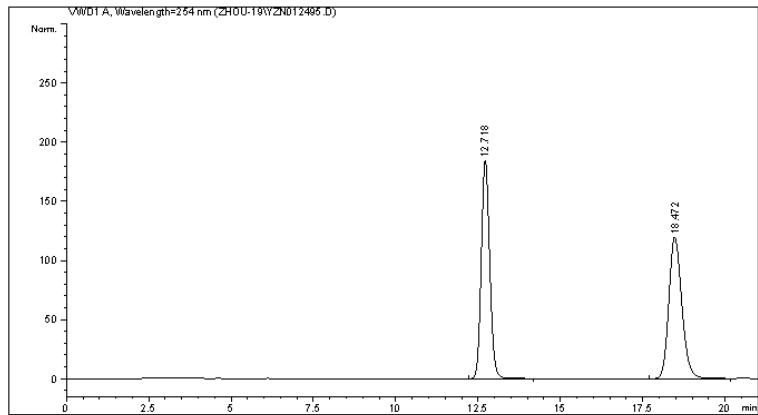

=====  
 Area Percent Report  
 =====

Sorted By : Signal  
 Multiplier: : 1.0000  
 Dilution: : 1.0000  
 Use Multiplier & Dilution Factor with ISTDs

Signal 1: VWD1 A, Wavelength=254 nm

| Peak # | RetTime [min] | Type | Width [min] | Area [mAU*s] | Height [mAU] | Area %  |
|--------|---------------|------|-------------|--------------|--------------|---------|
| 1      | 12.718        | BB   | 0.2750      | 3297.26880   | 184.88219    | 50.0874 |
| 2      | 18.472        | BB   | 0.4221      | 3285.76343   | 119.71832    | 49.9126 |

Totals : 6583.03223 304.60050

=====  
 \*\*\* End of Report \*\*\*

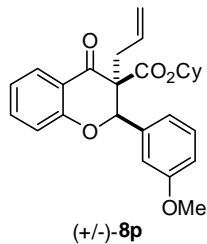

Data File C:\CHEM32\1\DATA\ZHOU-19\YZN012497.D  
 Sample Name: HZ-5-93B

=====  
 Acq. Operator :  
 Acq. Instrument : Instrument 1 Location : -  
 Injection Date : 4/26/2019 11:05:50 AM  
 Acq. Method : C:\CHEM32\1\METHODS\DEF\_LC11.M  
 Last changed : 4/26/2019 11:04:25 AM  
 (modified after loading)  
 Analysis Method : C:\CHEM32\1\METHODS\DEF\_LC11.M  
 Last changed : 7/12/2019 9:03:58 AM  
 (modified after loading)  
 Sample Info : IC, Hexane/i-PrOH = 98/2, 0.8 mL/min, 30 oC, 254 nm

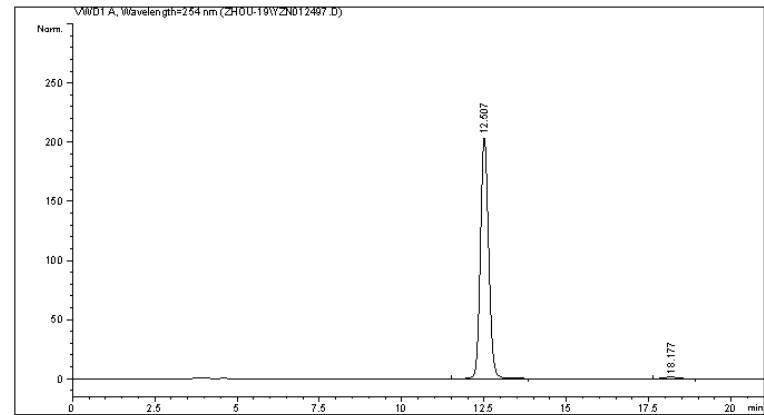

=====  
 Area Percent Report  
 =====

Sorted By : Signal  
 Multiplier: : 1.0000  
 Dilution: : 1.0000  
 Use Multiplier & Dilution Factor with ISTDs

Signal 1: VWD1 A, Wavelength=254 nm

| Peak # | RetTime [min] | Type | Width [min] | Area [mAU*s] | Height [mAU] | Area %  |
|--------|---------------|------|-------------|--------------|--------------|---------|
| 1      | 12.507        | BB   | 0.2704      | 3555.88794   | 203.96745    | 98.9343 |
| 2      | 18.177        | BB   | 0.4274      | 38.30169     | 1.39785      | 1.0657  |

Totals : 3594.18963 205.36530

=====  
 \*\*\* End of Report \*\*\*

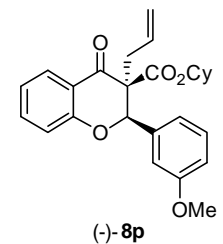

Data File C:\CHEM32\1\DATA\ZHOU-19\YZN012720.D  
 Sample Name: HZ-6-13A+

=====  
 Acq. Operator :  
 Acq. Instrument : Instrument 1 Location : -  
 Injection Date : 5/23/2019 11:13:16 AM  
 Acq. Method : C:\CHEM32\1\METHODS\DEF\_LC11.M  
 Last changed : 5/23/2019 11:10:55 AM  
 (modified after loading)  
 Analysis Method : C:\CHEM32\1\METHODS\DEF\_LC11.M  
 Last changed : 7/12/2019 7:25:44 AM  
 (modified after loading)  
 Sample Info : IC, Hexane/i-PrOH = 99/1, 1.0 mL/min, 30 oC, 254 nm

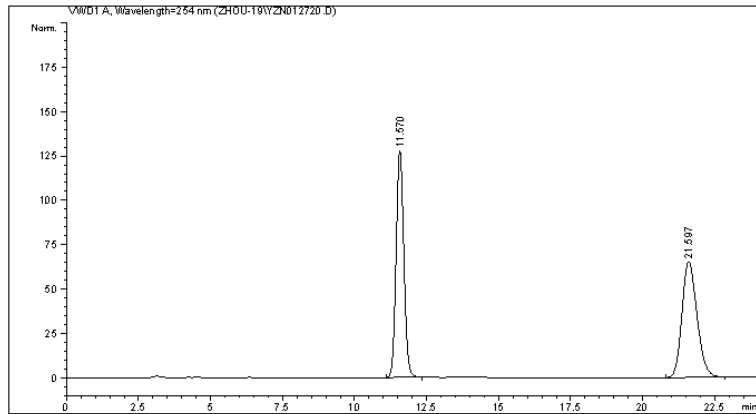

=====  
 Area Percent Report  
 =====

Sorted By : Signal  
 Multiplier: : 1.0000  
 Dilution: : 1.0000  
 Use Multiplier & Dilution Factor with ISTDs

Signal 1: VWD1 A, Wavelength=254 nm

| Peak # | RetTime [min] | Type | Width [min] | Area [mAU] | Height [mAU] | Area %  |
|--------|---------------|------|-------------|------------|--------------|---------|
| 1      | 11.570        | BB   | 0.2884      | 2379.09741 | 127.86348    | 50.0762 |
| 2      | 21.597        | BB   | 0.5617      | 2371.85791 | 65.35931     | 49.9238 |

Totals : 4750.95532 193.22279

=====  
 \*\*\* End of Report \*\*\*

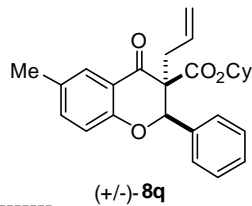

Data File C:\CHEM32\1\DATA\ZHOU-19\YZN012724.D  
 Sample Name: HZ-6-15A

=====  
 Acq. Operator :  
 Acq. Instrument : Instrument 1 Location : -  
 Injection Date : 5/23/2019 1:22:54 PM  
 Acq. Method : C:\CHEM32\1\METHODS\DEF\_LC11.M  
 Last changed : 5/23/2019 1:21:48 PM  
 (modified after loading)  
 Analysis Method : C:\CHEM32\1\METHODS\DEF\_LC11.M  
 Last changed : 7/12/2019 7:27:02 AM  
 (modified after loading)  
 Sample Info : IC, Hexane/i-PrOH = 99/1, 1.0 mL/min, 30 oC, 254 nm

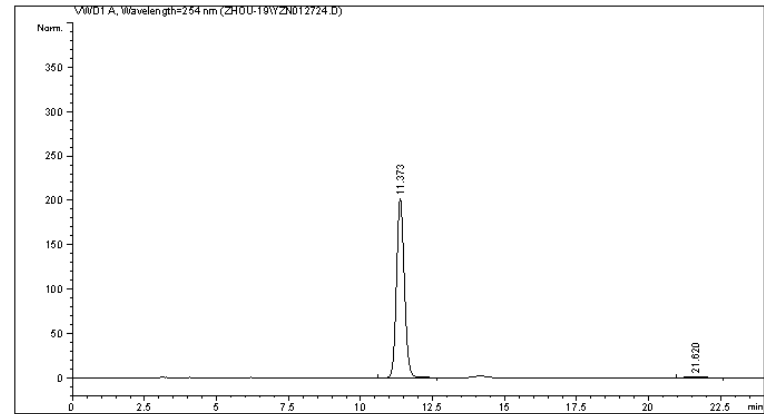

=====  
 Area Percent Report  
 =====

Sorted By : Signal  
 Multiplier: : 1.0000  
 Dilution: : 1.0000  
 Use Multiplier & Dilution Factor with ISTDs

Signal 1: VWD1 A, Wavelength=254 nm

| Peak # | RetTime [min] | Type | Width [min] | Area [mAU] | Height [mAU] | Area %  |
|--------|---------------|------|-------------|------------|--------------|---------|
| 1      | 11.373        | BB   | 0.2934      | 3813.63843 | 201.73183    | 98.9318 |
| 2      | 21.620        | BB   | 0.5686      | 41.17778   | 1.09063      | 1.0682  |

Totals : 3854.81620 202.82246

=====  
 \*\*\* End of Report \*\*\*

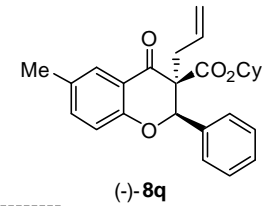

Data File C:\CHEM32\1\DATA\ZHOU-19\YZN012809.D  
 Sample Name: HZ-6-25+-

=====  
 Acq. Operator :  
 Acq. Instrument : Instrument 1 Location : -  
 Injection Date : 6/6/2019 7:34:07 PM  
 Acq. Method : C:\CHEM32\1\METHODS\DEF\_LC11.M  
 Last changed : 6/6/2019 7:32:10 PM  
 (modified after loading)  
 Analysis Method : C:\CHEM32\1\METHODS\DEF\_LC11.M  
 Last changed : 7/12/2019 7:33:45 AM  
 (modified after loading)  
 Sample Info : IC, Hexane/i-PrOH = 99/1, 1.0 mL/min, 30 oC, 254nm

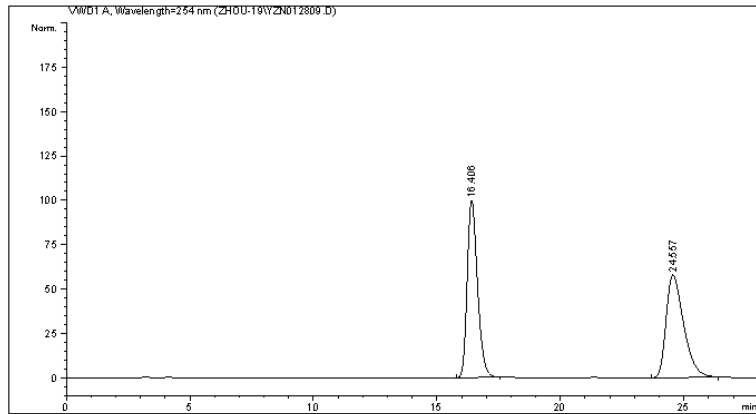

=====  
 Area Percent Report  
 =====

Sorted By : Signal  
 Multiplier: : 1.0000  
 Dilution: : 1.0000  
 Use Multiplier & Dilution Factor with ISTDs

Signal 1: VWD1 A, Wavelength=254 nm

| Peak # | RetTime [min] | Type | Width [min] | Area [mAU] | Area %  | Height [mAU] |
|--------|---------------|------|-------------|------------|---------|--------------|
| 1      | 16.406        | BB   | 0.4455      | 2892.05713 | 50.1896 | 99.90707     |
| 2      | 24.557        | BB   | 0.7534      | 2870.20605 | 49.8104 | 58.01248     |

Totals : 5762.26318 157.91956

=====  
 \*\*\* End of Report \*\*\*

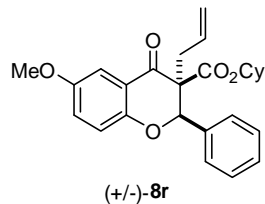

Data File C:\CHEM32\1\DATA\ZHOU-19\YZN012808.D  
 Sample Name: HZ-6-28

=====  
 Acq. Operator :  
 Acq. Instrument : Instrument 1 Location : -  
 Injection Date : 6/6/2019 6:54:12 PM  
 Acq. Method : C:\CHEM32\1\METHODS\DEF\_LC11.M  
 Last changed : 6/6/2019 6:52:23 PM  
 (modified after loading)  
 Analysis Method : C:\CHEM32\1\METHODS\DEF\_LC11.M  
 Last changed : 7/12/2019 7:34:35 AM  
 (modified after loading)  
 Sample Info : IC, Hexane/i-PrOH = 99/1, 1.0 mL/min, 30 oC, 254nm

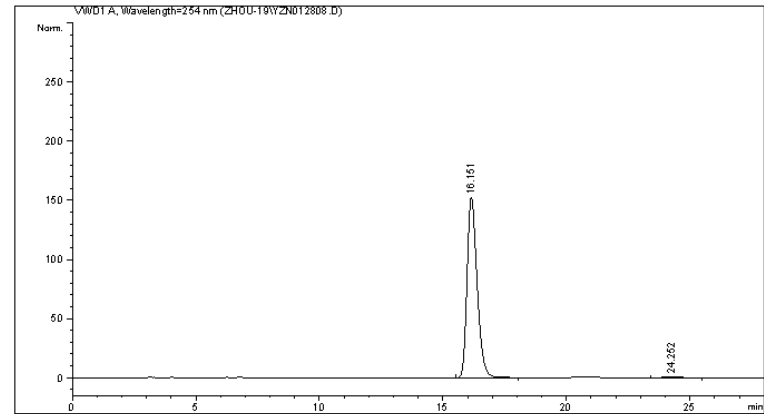

=====  
 Area Percent Report  
 =====

Sorted By : Signal  
 Multiplier: : 1.0000  
 Dilution: : 1.0000  
 Use Multiplier & Dilution Factor with ISTDs

Signal 1: VWD1 A, Wavelength=254 nm

| Peak # | RetTime [min] | Type | Width [min] | Area [mAU] | Area %  | Height [mAU] |
|--------|---------------|------|-------------|------------|---------|--------------|
| 1      | 16.151        | BB   | 0.4339      | 4305.24219 | 99.0482 | 152.64198    |
| 2      | 24.262        | BB   | 0.7059      | 41.37173   | 0.9518  | 8.70460e-1   |

Totals : 4346.61392 153.51244

=====  
 \*\*\* End of Report \*\*\*

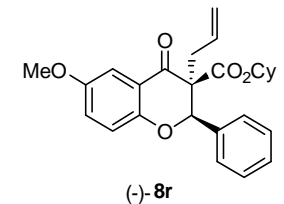



Data File C:\CHEM32\1\DATA\ZHOU-19\YZN012725.D  
 Sample Name: HZ-6-14B+

=====  
 Acq. Operator :  
 Acq. Instrument : Instrument 1 Location : -  
 Injection Date : 5/23/2019 1:52:58 PM  
 Acq. Method : C:\CHEM32\1\METHODS\DEF\_LC11.M  
 Last changed : 5/23/2019 1:49:04 PM  
 (modified after loading)  
 Analysis Method : C:\CHEM32\1\METHODS\DEF\_LC11.M  
 Last changed : 7/12/2019 7:28:44 AM  
 (modified after loading)  
 Sample Info : IC, Hexane/i-PrOH = 99/1, 1.0 mL/min, 30 oC, 254 nm

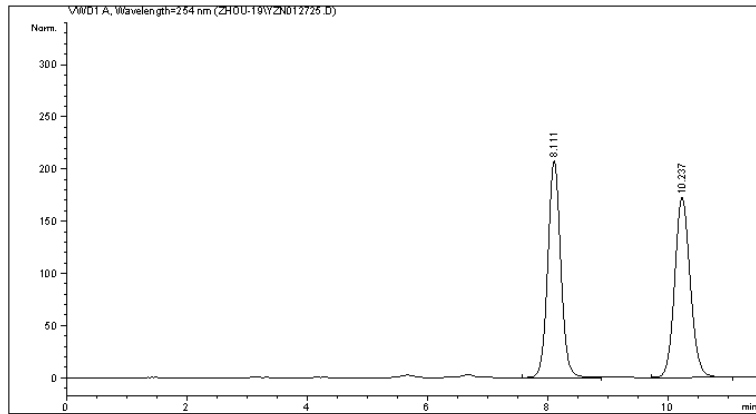

=====  
 Area Percent Report  
 =====

Sorted By : Signal  
 Multiplier: : 1.0000  
 Dilution: : 1.0000  
 Use Multiplier & Dilution Factor with ISTDs

Signal 1: VWD1 A, Wavelength=254 nm

| Peak # | RetTime [min] | Type | Width [min] | Area mAU   | Area %  | Height [mAU] | Area %  |
|--------|---------------|------|-------------|------------|---------|--------------|---------|
| 1      | 8.111         | BB   | 0.2294      | 3098.75928 | 49.9645 | 207.66937    | 49.9645 |
| 2      | 10.237        | BB   | 0.2770      | 3103.15991 | 50.0355 | 172.36786    | 50.0355 |

Totals : 6201.91919 380.03723

=====  
 \*\*\* End of Report \*\*\*

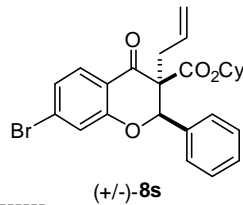

Data File C:\CHEM32\1\DATA\ZHOU-19\YZN012728.D  
 Sample Name: HZ-6-16B

=====  
 Acq. Operator :  
 Acq. Instrument : Instrument 1 Location : -  
 Injection Date : 5/23/2019 2:44:34 PM  
 Acq. Method : C:\CHEM32\1\METHODS\DEF\_LC11.M  
 Last changed : 5/23/2019 2:42:13 PM  
 (modified after loading)  
 Analysis Method : C:\CHEM32\1\METHODS\DEF\_LC11.M  
 Last changed : 7/12/2019 7:28:44 AM  
 (modified after loading)  
 Sample Info : IC, Hexane/i-PrOH = 99/1, 1.0 mL/min, 30 oC, 254 nm

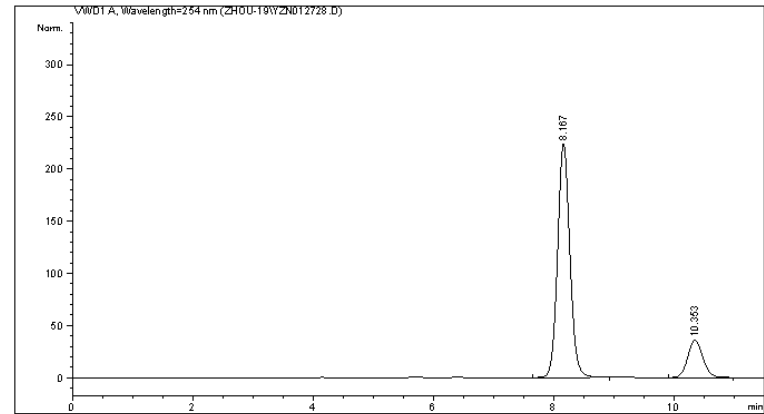

=====  
 Area Percent Report  
 =====

Sorted By : Signal  
 Multiplier: : 1.0000  
 Dilution: : 1.0000  
 Use Multiplier & Dilution Factor with ISTDs

Signal 1: VWD1 A, Wavelength=254 nm

| Peak # | RetTime [min] | Type | Width [min] | Area mAU   | Area %  | Height [mAU] | Area %  |
|--------|---------------|------|-------------|------------|---------|--------------|---------|
| 1      | 8.167         | BB   | 0.2184      | 3187.21680 | 83.4842 | 224.07458    | 83.4842 |
| 2      | 10.353        | BB   | 0.2696      | 630.53333  | 16.5158 | 36.05210     | 16.5158 |

Totals : 3817.75012 260.12669

=====  
 \*\*\* End of Report \*\*\*

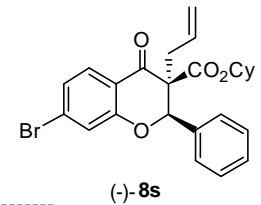

Data File C:\CHEM32\1\DATA\ZHOU-19\YZN012615.D  
 Sample Name: HZ-6-9B+-

=====  
 Acq. Operator :  
 Acq. Instrument : Instrument 1 Location : -  
 Injection Date : 5/14/2019 2:16:32 PM  
 Acq. Method : C:\CHEM32\1\METHODS\DEF\_LC11.M  
 Last changed : 5/14/2019 1:45:51 PM  
 (modified after loading)  
 Analysis Method : C:\CHEM32\1\METHODS\DEF\_LC11.M  
 Last changed : 7/12/2019 7:22:37 AM  
 (modified after loading)  
 Sample Info : IC, Hexane/i-PrOH = 99/1, 1.0 mL/min, 30 oC, 254 nm

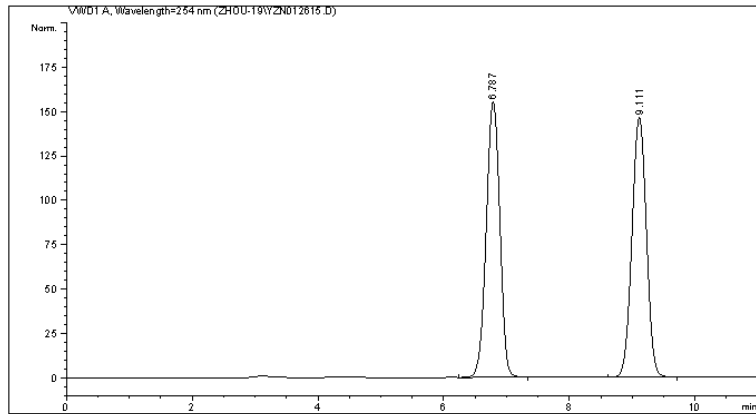

=====  
 Area Percent Report  
 =====

Sorted By : Signal  
 Multiplier: : 1.0000  
 Dilution: : 1.0000  
 Use Multiplier & Dilution Factor with ISTDs

Signal 1: VWD1 A, Wavelength=254 nm

| Peak # | RetTime [min] | Type | Width [min] | Area [mAU] | Height [%s] | Area [%] |
|--------|---------------|------|-------------|------------|-------------|----------|
| 1      | 6.787         | VB   | 0.2381      | 2334.02466 | 155.16696   | 49.8979  |
| 2      | 9.111         | BB   | 0.2523      | 2343.57910 | 146.38698   | 50.1021  |

Totals : 4677.60376 301.55394

=====  
 \*\*\* End of Report \*\*\*

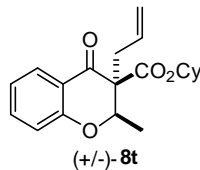

Data File C:\CHEM32\1\DATA\ZHOU-19\YZN012617.D  
 Sample Name: HZ-6-9B

=====  
 Acq. Operator :  
 Acq. Instrument : Instrument 1 Location : -  
 Injection Date : 5/14/2019 3:06:42 PM  
 Acq. Method : C:\CHEM32\1\METHODS\DEF\_LC11.M  
 Last changed : 5/14/2019 3:05:04 PM  
 (modified after loading)  
 Analysis Method : C:\CHEM32\1\METHODS\DEF\_LC11.M  
 Last changed : 7/12/2019 7:23:32 AM  
 (modified after loading)  
 Sample Info : IC, Hexane/i-PrOH = 99/1, 1.0 mL/min, 30 oC, 254 nm

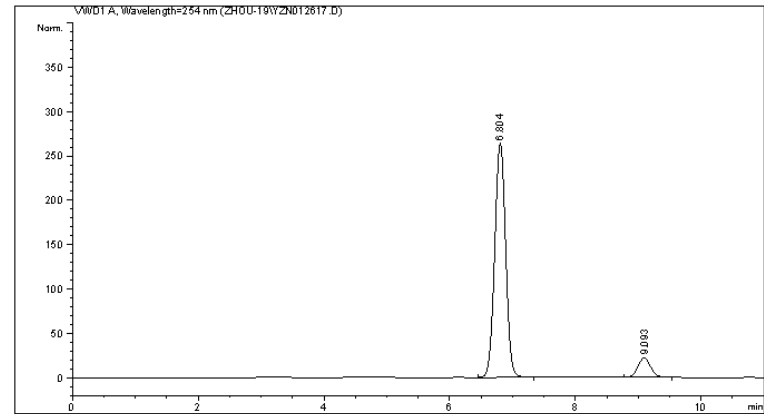

=====  
 Area Percent Report  
 =====

Sorted By : Signal  
 Multiplier: : 1.0000  
 Dilution: : 1.0000  
 Use Multiplier & Dilution Factor with ISTDs

Signal 1: VWD1 A, Wavelength=254 nm

| Peak # | RetTime [min] | Type | Width [min] | Area [mAU] | Height [%s] | Area [%] |
|--------|---------------|------|-------------|------------|-------------|----------|
| 1      | 6.804         | BB   | 0.1891      | 3189.43066 | 263.81479   | 91.0900  |
| 2      | 9.093         | BB   | 0.2214      | 3111.97650 | 21.91809    | 8.9100   |

Totals : 3501.40717 285.73288

=====  
 \*\*\* End of Report \*\*\*

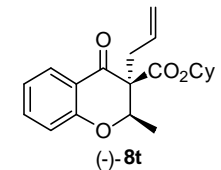

Data File C:\CHEM32\1\DATA\ZHOU-19\YZN012895.D  
 Sample Name: HZ-6-32A+

=====  
 Acq. Operator :  
 Acq. Instrument : Instrument 1 Location : -  
 Injection Date : 6/18/2019 3:47:26 PM  
 Acq. Method : C:\CHEM32\1\METHODS\DEF\_LC11.M  
 Last changed : 6/18/2019 3:45:19 PM  
 (modified after loading)  
 Analysis Method : C:\CHEM32\1\METHODS\DEF\_LC11.M  
 Last changed : 7/12/2019 7:36:30 AM  
 (modified after loading)  
 Sample Info : IC, Hexane/i-PrOH = 99/1, 1.0 mL/min, 30 oC, 254 nm

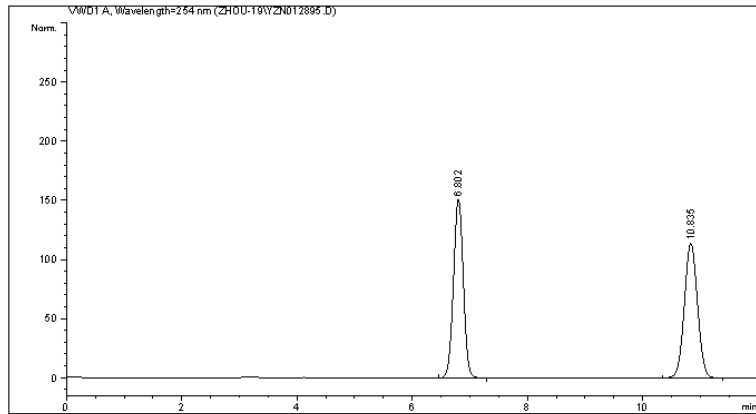

=====  
 Area Percent Report  
 =====

Sorted By : Signal  
 Multiplier: : 1.0000  
 Dilution: : 1.0000  
 Use Multiplier & Dilution Factor with ISTDs

Signal 1: VWD1 A, Wavelength=254 nm

| Peak # | RetTime [min] | Type | Width [min] | Area mAU   | Height %s | Area [mAU] | Area % |
|--------|---------------|------|-------------|------------|-----------|------------|--------|
| 1      | 6.802         | VB   | 0.1849      | 1793.43872 | 151.29637 | 49.8426    |        |
| 2      | 10.835        | BB   | 0.2475      | 1804.76294 | 113.89653 | 50.1574    |        |

Totals : 3598.20166 265.19290

=====  
 \*\*\* End of Report \*\*\*

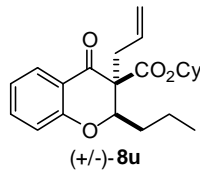

Data File C:\CHEM32\1\DATA\ZHOU-19\YZN012894.D  
 Sample Name: HZ-6-38B

=====  
 Acq. Operator :  
 Acq. Instrument : Instrument 1 Location : -  
 Injection Date : 6/18/2019 3:28:28 PM  
 Acq. Method : C:\CHEM32\1\METHODS\DEF\_LC11.M  
 Last changed : 6/18/2019 3:14:53 PM  
 (modified after loading)  
 Analysis Method : C:\CHEM32\1\METHODS\DEF\_LC11.M  
 Last changed : 7/12/2019 7:36:55 AM  
 (modified after loading)  
 Sample Info : IC, Hexane/i-PrOH = 99/1, 1.0 mL/min, 30 oC, 254 nm

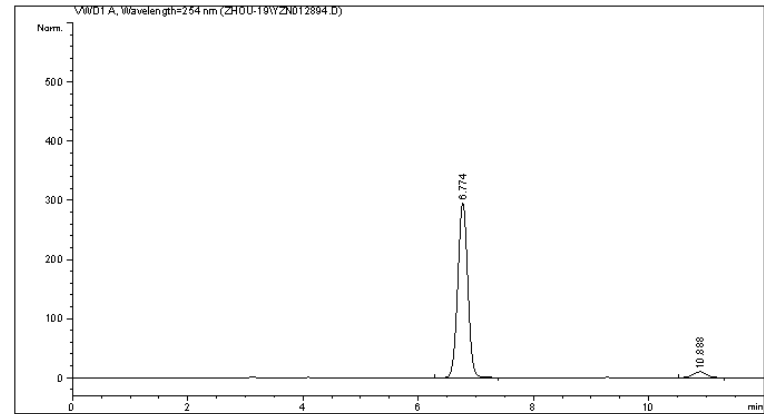

=====  
 Area Percent Report  
 =====

Sorted By : Signal  
 Multiplier: : 1.0000  
 Dilution: : 1.0000  
 Use Multiplier & Dilution Factor with ISTDs

Signal 1: VWD1 A, Wavelength=254 nm

| Peak # | RetTime [min] | Type | Width [min] | Area mAU   | Height %s | Area [mAU] | Area % |
|--------|---------------|------|-------------|------------|-----------|------------|--------|
| 1      | 6.774         | BB   | 0.1877      | 3538.31787 | 295.53546 | 95.6065    |        |
| 2      | 10.888        | BB   | 0.2538      | 162.59843  | 9.99957   | 4.3935     |        |

Totals : 3700.91631 305.53503

=====  
 \*\*\* End of Report \*\*\*

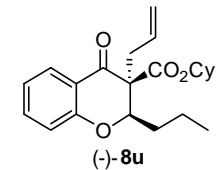

Data File C:\CHEM32\1\DATA\ZHOU-19\YZN012892.D  
 Sample Name: HZ-6-33B+

=====  
 Acq. Operator :  
 Acq. Instrument : Instrument 1 Location : -  
 Injection Date : 6/18/2019 2:17:51 PM  
 Acq. Method : C:\CHEM32\1\METHODS\DEF\_LC11.M  
 Last changed : 6/18/2019 2:07:51 PM  
 (modified after loading)  
 Analysis Method : C:\CHEM32\1\METHODS\DEF\_LC11.M  
 Last changed : 7/12/2019 7:45:11 AM  
 (modified after loading)  
 Sample Info : IC, Hexane/i-PrOH = 99/1, 1.0 mL/min, 30 oC, 254 nm

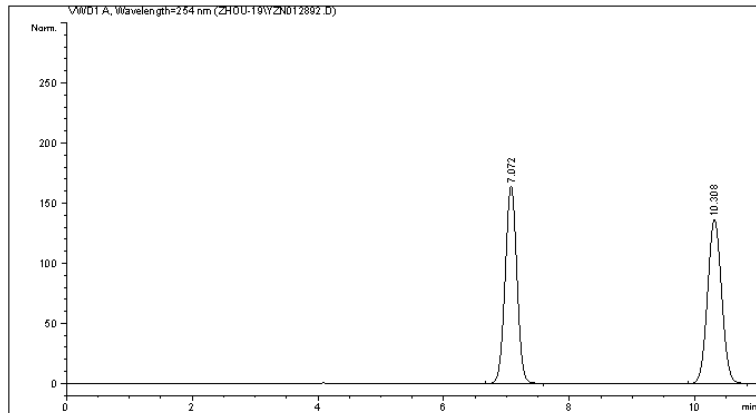

=====  
 Area Percent Report  
 =====

Sorted By : Signal  
 Multiplier: : 1.0000  
 Dilution: : 1.0000  
 Use Multiplier & Dilution Factor with ISTDs

Signal 1: VWD1 A, Wavelength=254 nm

| Peak # | RetTime [min] | Type | Width [min] | Area mAU   | Height %s | Area [mAU] | Area % |
|--------|---------------|------|-------------|------------|-----------|------------|--------|
| 1      | 7.072         | BB   | 0.2035      | 2126.85376 | 164.21469 | 50.0675    |        |
| 2      | 10.308        | BB   | 0.2425      | 2121.11694 | 136.48390 | 49.9325    |        |

Totals : 4247.97070 300.69859

=====  
 \*\*\* End of Report \*\*\*

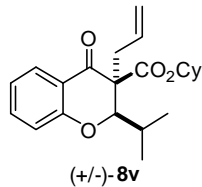

Data File C:\CHEM32\1\DATA\ZHOU-19\YZN012890.D  
 Sample Name: HZ-6-38C

=====  
 Acq. Operator :  
 Acq. Instrument : Instrument 1 Location : -  
 Injection Date : 6/18/2019 1:37:16 PM  
 Acq. Method : C:\CHEM32\1\METHODS\DEF\_LC11.M  
 Last changed : 6/18/2019 1:36:10 PM  
 (modified after loading)  
 Analysis Method : C:\CHEM32\1\METHODS\DEF\_LC11.M  
 Last changed : 7/12/2019 7:43:59 AM  
 (modified after loading)  
 Sample Info : IC, Hexane/i-PrOH = 99/1, 1.0 mL/min, 30 oC, 254 nm

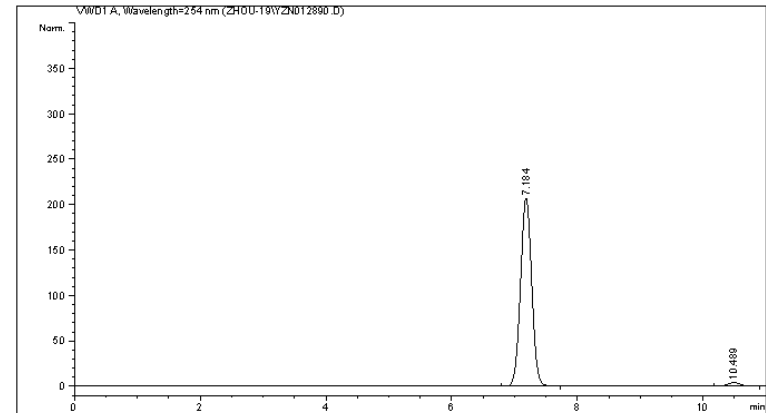

=====  
 Area Percent Report  
 =====

Sorted By : Signal  
 Multiplier: : 1.0000  
 Dilution: : 1.0000  
 Use Multiplier & Dilution Factor with ISTDs

Signal 1: VWD1 A, Wavelength=254 nm

| Peak # | RetTime [min] | Type | Width [min] | Area mAU   | Height %s | Area [mAU] | Area % |
|--------|---------------|------|-------------|------------|-----------|------------|--------|
| 1      | 7.184         | BB   | 0.1940      | 2566.23267 | 207.14871 | 97.7005    |        |
| 2      | 10.489        | BB   | 0.2374      | 60.39883   | 3.96568   | 2.2995     |        |

Totals : 2626.63150 211.11439

=====  
 \*\*\* End of Report \*\*\*

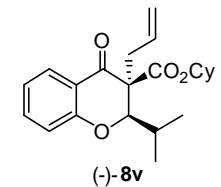

Data File C:\CHEM32\1\DATA\ZHOU-19\YZN012744.D  
 Sample Name: HZ-6-14C+

=====  
 Acq. Operator :  
 Acq. Instrument : Instrument 1 Location : -  
 Injection Date : 5/24/2019 1:58:19 PM  
 Acq. Method : C:\CHEM32\1\METHODS\DEF\_LC11.M  
 Last changed : 5/24/2019 1:41:23 PM  
 (modified after loading)  
 Analysis Method : C:\CHEM32\1\METHODS\DEF\_LC11.M  
 Last changed : 7/12/2019 7:30:54 AM  
 (modified after loading)  
 Sample Info : IC, Hexane/i-PrOH = 99/1, 0.7 mL/min, 30 oC, 254 nm

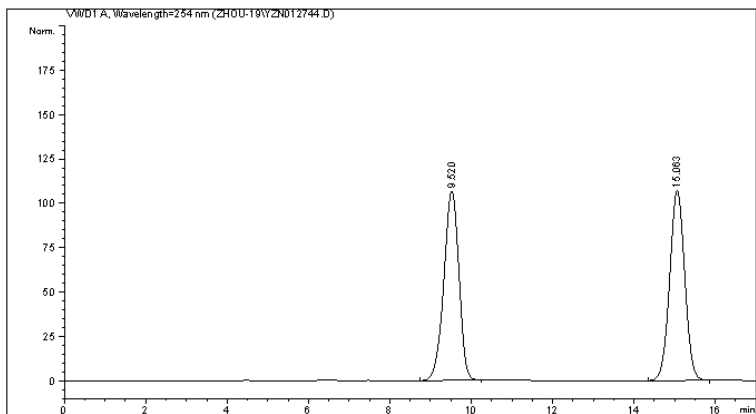

=====  
 Area Percent Report  
 =====

Sorted By : Signal  
 Multiplier: : 1.0000  
 Dilution: : 1.0000  
 Use Multiplier & Dilution Factor with ISTDs

Signal 1: VWD1 A, Wavelength=254 nm

| Peak # | RetTime [min] | Type | Width [min] | Area [mAU] | Area %  | Height [mAU] |
|--------|---------------|------|-------------|------------|---------|--------------|
| 1      | 9.520         | BB   | 0.4011      | 2752.42163 | 49.9998 | 106.80527    |
| 2      | 15.063        | BB   | 0.3991      | 2752.44312 | 50.0002 | 106.99122    |

Totals : 5504.86475 213.79649

=====  
 \*\*\* End of Report \*\*\*

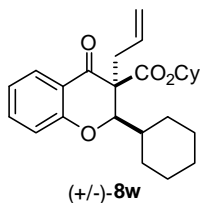

Data File C:\CHEM32\1\DATA\ZHOU-19\YZN012738.D  
 Sample Name: HZ-6-16C

=====  
 Acq. Operator :  
 Acq. Instrument : Instrument 1 Location : -  
 Injection Date : 5/24/2019 11:01:39 AM  
 Acq. Method : C:\CHEM32\1\METHODS\DEF\_LC11.M  
 Last changed : 5/24/2019 11:00:02 AM  
 (modified after loading)  
 Analysis Method : C:\CHEM32\1\METHODS\DEF\_LC11.M  
 Last changed : 7/12/2019 7:30:54 AM  
 (modified after loading)  
 Sample Info : IC, Hexane/i-PrOH = 99/1, 0.7 mL/min, 30 oC, 254 nm

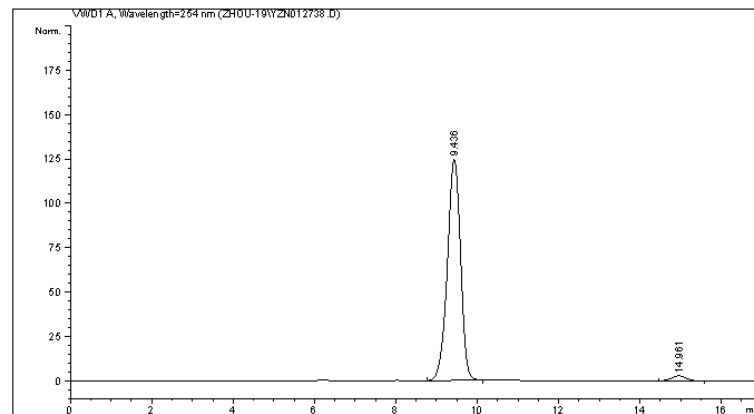

=====  
 Area Percent Report  
 =====

Sorted By : Signal  
 Multiplier: : 1.0000  
 Dilution: : 1.0000  
 Use Multiplier & Dilution Factor with ISTDs

Signal 1: VWD1 A, Wavelength=254 nm

| Peak # | RetTime [min] | Type | Width [min] | Area [mAU] | Area %  | Height [mAU] |
|--------|---------------|------|-------------|------------|---------|--------------|
| 1      | 9.436         | BB   | 0.3503      | 2808.21704 | 97.6537 | 124.61282    |
| 2      | 14.961        | BB   | 0.3749      | 67.47202   | 2.3463  | 2.77970      |

Totals : 2875.68906 127.39252

=====  
 \*\*\* End of Report \*\*\*

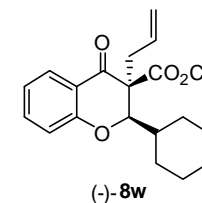

Data File C:\CHEM32\1\DATA\ZHOU-19\YZN013044.D  
 Sample Name: HZ-6-49+-

=====  
 Acq. Operator :  
 Acq. Instrument : Instrument 1 Location : -  
 Injection Date : 6/30/2019 10:48:17 PM  
 Acq. Method : C:\CHEM32\1\METHODS\DEF\_LC11.M  
 Last changed : 6/30/2019 10:46:47 PM  
 (modified after loading)  
 Analysis Method : C:\CHEM32\1\METHODS\DEF\_LC11.M  
 Last changed : 7/12/2019 7:51:05 AM  
 (modified after loading)  
 Sample Info : IC, Hexane/i-PrOH = 98/2, 1.0 mL/min, 30 oC, 230 nm

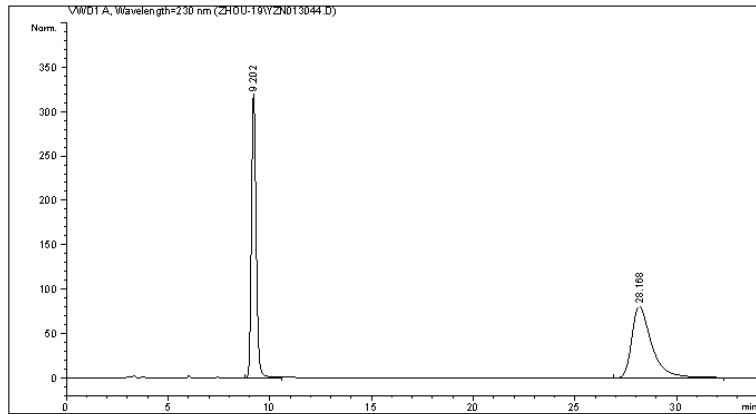

=====  
 Area Percent Report  
 =====

Sorted By : Signal  
 Multiplier: : 1.0000  
 Dilution: : 1.0000  
 Use Multiplier & Dilution Factor with ISTDs

Signal 1: VWD1 A, Wavelength=230 nm

| Peak # | RetTime [min] | Type | Width [min] | Area mAU   | Height %s | Area [mAU] | Area % |
|--------|---------------|------|-------------|------------|-----------|------------|--------|
| 1      | 9.202         | BV   | 0.2496      | 5161.31494 | 319.48514 | 48.7492    |        |
| 2      | 28.168        | BB   | 1.0141      | 5426.16504 | 80.14133  | 51.2508    |        |

Totals : 1.05875e4 399.62646

=====  
 \*\*\* End of Report \*\*\*

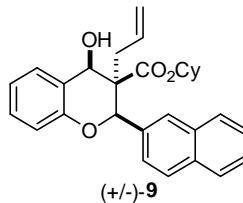

Data File C:\CHEM32\1\DATA\ZHOU-19\YZN013043.D  
 Sample Name: HZ-6-49

=====  
 Acq. Operator :  
 Acq. Instrument : Instrument 1 Location : -  
 Injection Date : 6/30/2019 10:09:52 PM  
 Acq. Method : C:\CHEM32\1\METHODS\DEF\_LC11.M  
 Last changed : 6/30/2019 10:09:15 PM  
 (modified after loading)  
 Analysis Method : C:\CHEM32\1\METHODS\DEF\_LC11.M  
 Last changed : 7/12/2019 7:51:38 AM  
 (modified after loading)  
 Sample Info : IC, Hexane/i-PrOH = 98/2, 1.0 mL/min, 30 oC, 230 nm

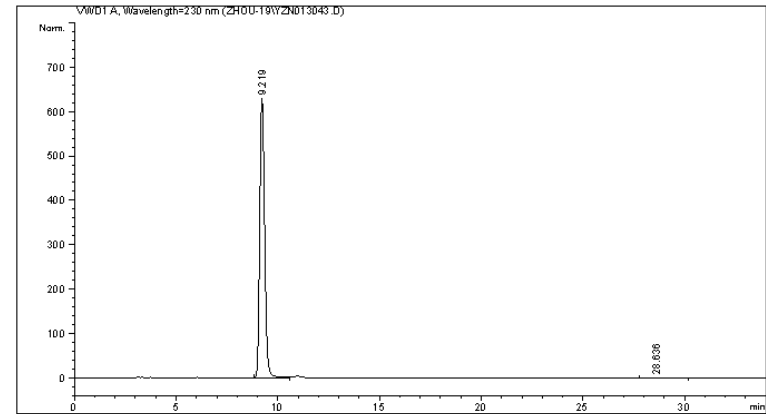

=====  
 Area Percent Report  
 =====

Sorted By : Signal  
 Multiplier: : 1.0000  
 Dilution: : 1.0000  
 Use Multiplier & Dilution Factor with ISTDs

Signal 1: VWD1 A, Wavelength=230 nm

| Peak # | RetTime [min] | Type | Width [min] | Area mAU  | Height %s  | Area [mAU] | Area % |
|--------|---------------|------|-------------|-----------|------------|------------|--------|
| 1      | 9.219         | BV   | 0.2629      | 1.05737e4 | 629.63544  | 99.7380    |        |
| 2      | 28.636        | BB   | 0.8190      | 27.77522  | 4.05735e-1 | 0.2620     |        |

Totals : 1.06014e4 630.04117

=====  
 \*\*\* End of Report \*\*\*

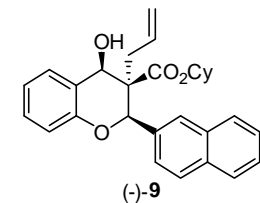

Data File C:\CHEM32\1\DATA\ZHOU-19\YZN013079.D  
 Sample Name: HZ-6-59+-

=====  
 Acq. Operator :  
 Acq. Instrument : Instrument 1 Location : -  
 Injection Date : 7/5/2019 3:46:44 PM  
 Acq. Method : C:\CHEM32\1\METHODS\DEF\_LC11.M  
 Last changed : 7/5/2019 3:42:04 PM  
 (modified after loading)  
 Analysis Method : C:\CHEM32\1\METHODS\DEF\_LC11.M  
 Last changed : 7/12/2019 7:53:00 AM  
 (modified after loading)  
 Sample Info : IA, Hexane/i-PrOH = 95/5, 1.0 mL/min, 30 oC, 230 nm

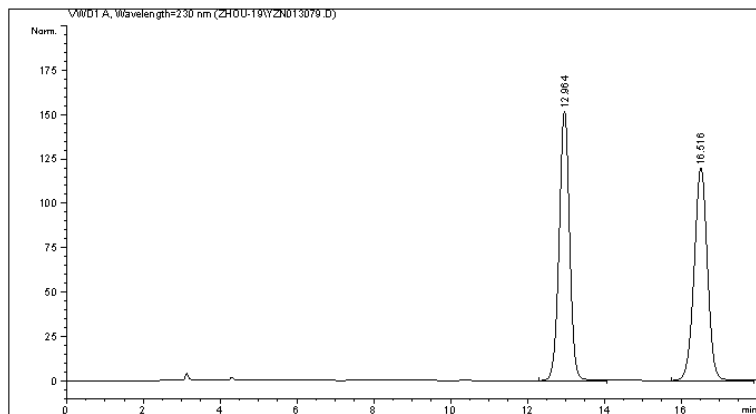

=====  
 Area Percent Report  
 =====

Sorted By : Signal  
 Multiplier: : 1.0000  
 Dilution: : 1.0000  
 Use Multiplier & Dilution Factor with ISTDs

Signal 1: VWD1 A, Wavelength=230 nm

| Peak # | RetTime [min] | Type | Width [min] | Area mAU   | Height %s | Area [mAU] | Area % |
|--------|---------------|------|-------------|------------|-----------|------------|--------|
| 1      | 12.964        | BB   | 0.2897      | 2862.83130 | 151.93648 | 49.9196    |        |
| 2      | 16.516        | BB   | 0.3728      | 2872.05151 | 119.83685 | 50.0804    |        |

Totals : 5734.88281 271.77333

=====  
 \*\*\* End of Report \*\*\*

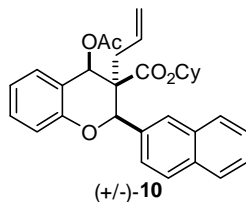

Data File C:\CHEM32\1\DATA\ZHOU-19\YZN013078.D  
 Sample Name: HZ-6-53

=====  
 Acq. Operator :  
 Acq. Instrument : Instrument 1 Location : -  
 Injection Date : 7/5/2019 3:21:50 PM  
 Acq. Method : C:\CHEM32\1\METHODS\DEF\_LC11.M  
 Last changed : 7/5/2019 3:18:37 PM  
 (modified after loading)  
 Analysis Method : C:\CHEM32\1\METHODS\DEF\_LC11.M  
 Last changed : 7/12/2019 7:55:39 AM  
 (modified after loading)  
 Sample Info : IA, Hexane/i-PrOH = 95/5, 1.0 mL/min, 30 oC, 230 nm

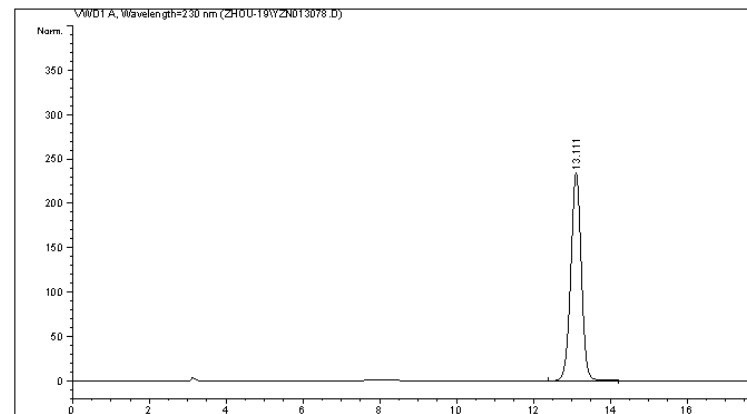

=====  
 Area Percent Report  
 =====

Sorted By : Signal  
 Multiplier: : 1.0000  
 Dilution: : 1.0000  
 Use Multiplier & Dilution Factor with ISTDs

Signal 1: VWD1 A, Wavelength=230 nm

| Peak # | RetTime [min] | Type | Width [min] | Area mAU   | Height %s | Area [mAU] | Area % |
|--------|---------------|------|-------------|------------|-----------|------------|--------|
| 1      | 13.111        | BB   | 0.2929      | 4446.59863 | 234.11324 | 100.0000   |        |

Totals : 4446.59863 234.11324

=====  
 \*\*\* End of Report \*\*\*

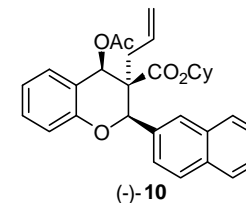

Data File C:\CHEM32\1\DATA\ZHOU-19\YZN013093.D  
 Sample Name: HZ-6-60+-

=====  
 Acq. Operator :  
 Acq. Instrument : Instrument 1 Location : -  
 Injection Date : 7/8/2019 11:16:10 AM  
 Acq. Method : C:\CHEM32\1\METHODS\DEF\_LC11.M  
 Last changed : 7/8/2019 11:15:52 AM  
 (modified after loading)  
 Analysis Method : C:\CHEM32\1\METHODS\DEF\_LC11.M  
 Last changed : 7/12/2019 7:58:33 AM  
 (modified after loading)  
 Sample Info : IC, Hexane/i-PrOH = 95/5, 0.8 mL/min, 30 oC, 230nm

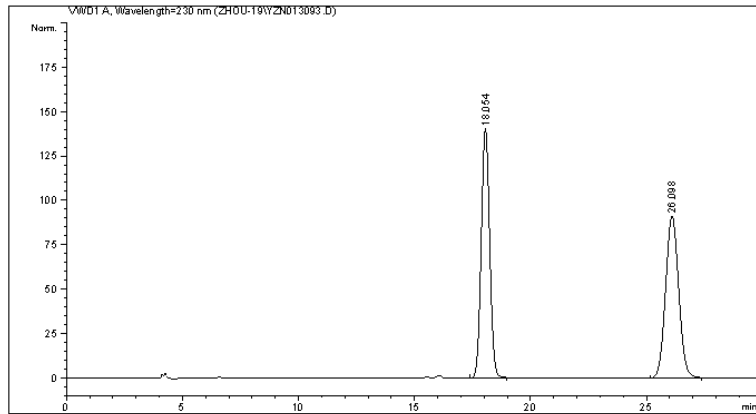

=====  
 Area Percent Report  
 =====

Sorted By : Signal  
 Multiplier: : 1.0000  
 Dilution: : 1.0000  
 Use Multiplier & Dilution Factor with ISTDs

Signal 1: VWD1 A, Wavelength=230 nm

| Peak # | RetTime [min] | Type | Width [min] | Area [mAU] | Height [mAU] | Area %  |
|--------|---------------|------|-------------|------------|--------------|---------|
| 1      | 18.054        | BB   | 0.3942      | 3535.55273 | 140.41505    | 49.6575 |
| 2      | 26.098        | BB   | 0.6123      | 3584.32813 | 91.31763     | 50.3425 |

Totals : 7119.88086 231.73269

=====  
 \*\*\* End of Report \*\*\*

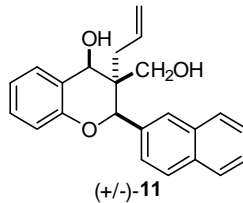

Data File C:\CHEM32\1\DATA\ZHOU-19\YZN013091.D  
 Sample Name: HZ-6-55

=====  
 Acq. Operator :  
 Acq. Instrument : Instrument 1 Location : -  
 Injection Date : 7/8/2019 10:14:42 AM  
 Acq. Method : C:\CHEM32\1\METHODS\DEF\_LC11.M  
 Last changed : 7/8/2019 10:13:28 AM  
 (modified after loading)  
 Analysis Method : C:\CHEM32\1\METHODS\DEF\_LC11.M  
 Last changed : 7/12/2019 7:57:37 AM  
 (modified after loading)  
 Sample Info : IC, Hexane/i-PrOH = 95/5, 0.8 mL/min, 30 oC, 230nm

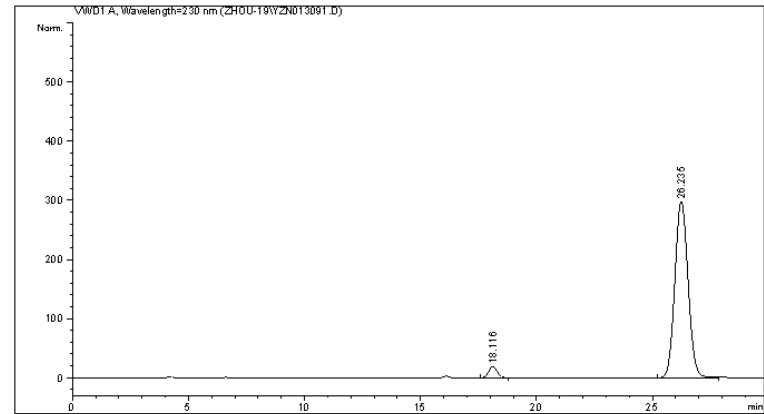

=====  
 Area Percent Report  
 =====

Sorted By : Signal  
 Multiplier: : 1.0000  
 Dilution: : 1.0000  
 Use Multiplier & Dilution Factor with ISTDs

Signal 1: VWD1 A, Wavelength=230 nm

| Peak # | RetTime [min] | Type | Width [min] | Area [mAU] | Height [mAU] | Area %  |
|--------|---------------|------|-------------|------------|--------------|---------|
| 1      | 18.116        | BB   | 0.3912      | 477.47681  | 19.06427     | 3.8962  |
| 2      | 26.235        | BB   | 0.6205      | 1.17773e4  | 297.52084    | 96.1038 |

Totals : 1.22548e4 316.58512

=====  
 \*\*\* End of Report \*\*\*

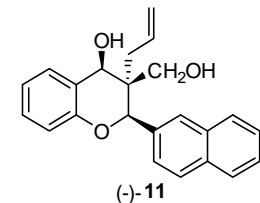



Data File C:\CHEM32\1\DATA\ZHOU-19\YZN013097.D  
 Sample Name: HZ-6-62+-

=====  
 Acq. Operator :  
 Acq. Instrument : Instrument 1 Location : -  
 Injection Date : 7/8/2019 10:41:07 PM  
 Acq. Method : C:\CHEM32\1\METHODS\DEF\_LC11.M  
 Last changed : 7/8/2019 10:38:06 PM  
 (modified after loading)  
 Analysis Method : C:\CHEM32\1\METHODS\DEF\_LC11.M  
 Last changed : 7/12/2019 8:00:25 AM  
 (modified after loading)  
 Sample Info : IA, Hexane/i-PrOH = 95/5, 1.0 mL/min, 30 oC, 230nm

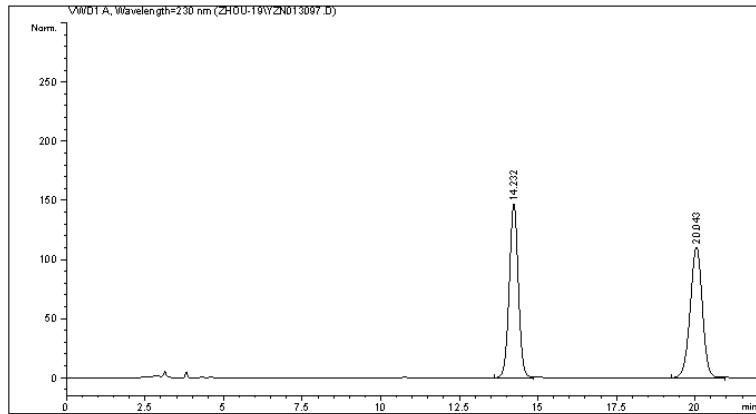

=====  
 Area Percent Report  
 =====

Sorted By : Signal  
 Multiplier: : 1.0000  
 Dilution: : 1.0000  
 Use Multiplier & Dilution Factor with ISTDs

Signal 1: VWD1 A, Wavelength=230 nm

| Peak # | RetTime [min] | Type | Width [min] | Area mAU   | Height %s | Area [mAU] | Area % |
|--------|---------------|------|-------------|------------|-----------|------------|--------|
| 1      | 14.232        | BB   | 0.3091      | 2936.47437 | 146.76790 | 49.8710    |        |
| 2      | 20.043        | BB   | 0.4137      | 2951.66016 | 110.46583 | 50.1290    |        |

Totals : 5888.13452 257.23373

=====  
 \*\*\* End of Report \*\*\*

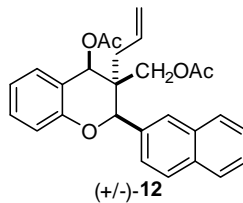

Data File C:\CHEM32\1\DATA\ZHOU-19\YZN013096.D  
 Sample Name: HZ-6-61

=====  
 Acq. Operator :  
 Acq. Instrument : Instrument 1 Location : -  
 Injection Date : 7/8/2019 10:12:40 PM  
 Acq. Method : C:\CHEM32\1\METHODS\DEF\_LC11.M  
 Last changed : 7/8/2019 10:11:31 PM  
 (modified after loading)  
 Analysis Method : C:\CHEM32\1\METHODS\DEF\_LC11.M  
 Last changed : 7/12/2019 7:59:40 AM  
 (modified after loading)  
 Sample Info : IA, Hexane/i-PrOH = 95/5, 1.0 mL/min, 30 oC, 230nm

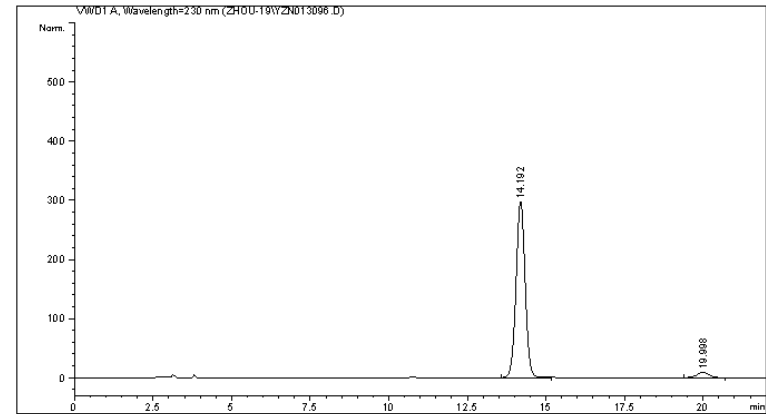

=====  
 Area Percent Report  
 =====

Sorted By : Signal  
 Multiplier: : 1.0000  
 Dilution: : 1.0000  
 Use Multiplier & Dilution Factor with ISTDs

Signal 1: VWD1 A, Wavelength=230 nm

| Peak # | RetTime [min] | Type | Width [min] | Area mAU   | Height %s | Area [mAU] | Area % |
|--------|---------------|------|-------------|------------|-----------|------------|--------|
| 1      | 14.192        | BB   | 0.3111      | 6003.69434 | 297.58200 | 96.2212    |        |
| 2      | 19.998        | BB   | 0.4099      | 235.77727  | 8.88931   | 3.7788     |        |

Totals : 6239.47160 306.47131

=====  
 \*\*\* End of Report \*\*\*

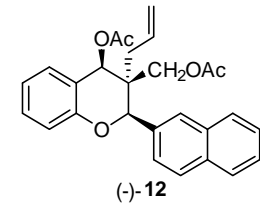

Supplement: d0sc04188b1.pdf [file d0sc04188b1.pdf]
